# Supplementary material for: Somatic Alteration Burden Involving Non-Cancer Genes Predicts Prognosis in Early-Stage Non-Small Cell Lung Cancer
Source: Cancers (Basel). 2019 Jul 19;11(7):1009. doi: 10.3390/cancers11071009 (PMC6678704; doi:10.3390/cancers11071009)
Supplement: Supplementary file 1 [file cancers-11-01009-s001.zip › cancers-549668-Supplementary Tables S1,S2,S3,S4,S7.xlsx]

## Sheet: Table S1
Table S1: List of 865 genes found to carry prognostic somatic mutations and copy number alterations
Gene	Description	% Altered in PDXs	mutations and chromosome location	CNV alteration location
A1CF	APOBEC1 complementation factor	0.111111	AC=1;AF=0.500;AN=2;BaseQRankSum=-11.230;DP=500;Dels=0.00;EFF=NON_SYNONYMOUS_CODING(MODERATE|MISSENSE|Ccc/Tcc|P64S|586|A1CF||CODING|NM_001198818.1|5|1),NON_SYNONYMOUS_CODING(MODERATE|MISSENSE|Ccc/Tcc|P64S|586|A1CF||CODING|NM_014576.3|4|1),NON_SYNONYMOUS_CODING(MODERATE|MISSENSE|Ccc/Tcc|P64S|594|A1CF||CODING|NM_138932.2|4|1),NON_SYNONYMOUS_CODING(MODERATE|MISSENSE|Ccc/Tcc|P72S|594|A1CF||CODING|NM_0…	chr10.52559168-52645435 ; 10q11.23 ; gain
A4GNT	alpha-1,4-N-acetylglucosaminyltransferase	0.0555556	AC=1;AF=0.500;AN=2;BaseQRankSum=5.263;DP=500;Dels=0.00;EFF=NON_SYNONYMOUS_CODING(MODERATE|MISSENSE|Cgc/Tgc|R313C|340|A4GNT||CODING|NM_016161.2|3|1);FS=16.501;HaplotypeScore=4.0849;MLEAC=1;MLEAF=0.500;MQ=60.00;MQ0=0;MQRankSum=-0.578;QD=12.41;ReadPosRankSum=1.523	chr3.137842559-137851229 ; 3q22.3 ; gain
ABCA1	ATP-binding cassette, sub-family A (ABC1), member 1	0.222222	AC=1;AF=0.500;AN=2;BaseQRankSum=10.216;DB;DP=500;Dels=0.00;EFF=NON_SYNONYMOUS_CODING(MODERATE|MISSENSE|atA/atG|I883M|2261|ABCA1||CODING|NM_005502.3|18|1);FS=9.328;HaplotypeScore=11.7265;MLEAC=1;MLEAF=0.500;MQ=60.00;MQ0=0;MQRankSum=0.307;QD=23.59;ReadPosRankSum=0.800	chr9.107543283-107690527 ; 9q31.1 ; loss
ABCA12	ATP-binding cassette, sub-family A (ABC1), member 12	0.0833333	AC=1;AF=0.500;AN=2;BaseQRankSum=-8.102;DP=500;Dels=0.00;EFF=NON_SYNONYMOUS_CODING(MODERATE|MISSENSE|gGa/gTa|G151V|2595|ABCA12||CODING|NM_173076.2|5|1);FS=5.142;HaplotypeScore=9.4065;MLEAC=1;MLEAF=0.500;MQ=59.95;MQ0=0;MQRankSum=0.048;QD=10.73;ReadPosRankSum=1.466	chr2.215796265-216003151 ; 2q35 ; gain
ABCA13	ATP-binding cassette, sub-family A (ABC1), member 13	0.388889	AC=1;AF=0.500;AN=2;BaseQRankSum=2.462;DB;DP=500;Dels=0.00;EFF=NON_SYNONYMOUS_CODING(MODERATE|MISSENSE|tAt/tTt|Y3851F|5058|ABCA13||CODING|NM_152701.3|37|1);FS=8.973;HaplotypeScore=5.7561;MLEAC=1;MLEAF=0.500;MQ=60.00;MQ0=0;MQRankSum=1.392;QD=9.90;ReadPosRankSum=0.025	chr7.48211056-48687091 ; 7p12.3 ; gain
ABCC1	ATP-binding cassette, sub-family C (CFTR/MRP), member 1	0.111111	AC=1;AF=0.500;AN=2;BaseQRankSum=-3.165;DP=500;Dels=0.00;EFF=NON_SYNONYMOUS_CODING(MODERATE|MISSENSE|Ctc/Ttc|L38F|1531|ABCC1||CODING|NM_004996.3|2|1);FS=1.934;HaplotypeScore=5.0802;MLEAC=1;MLEAF=0.500;MQ=60.00;MQ0=0;MQRankSum=0.469;QD=11.64;ReadPosRankSum=0.744	chr16.16043433-16236930 ; 16p13.11 ; gain
ABCC3	ATP-binding cassette, sub-family C (CFTR/MRP), member 3	0.166667	AC=1;AF=0.500;AN=2;BaseQRankSum=-0.988;DB;DP=500;Dels=0.00;EFF=NON_SYNONYMOUS_CODING(MODERATE|MISSENSE|cGc/cAc|R1297H|1527|ABCC3||CODING|NM_003786.3|27|1);FS=7.463;HaplotypeScore=8.2224;MLEAC=1;MLEAF=0.500;MQ=60.00;MQ0=0;MQRankSum=0.956;QD=9.07;ReadPosRankSum=3.624	chr17.48712217-48769063 ; 17q21.33 ; loss
ABI3BP	ABI family, member 3 (NESH) binding protein	0.111111	AC=1;AF=0.500;AN=2;BaseQRankSum=3.776;DP=500;Dels=0.00;EFF=NON_SYNONYMOUS_CODING(MODERATE|MISSENSE|aCa/aGa|T506R|1075|ABI3BP||CODING|NM_015429.3|17|1);FS=5.815;HaplotypeScore=9.1335;MLEAC=1;MLEAF=0.500;MQ=60.00;MQ0=0;MQRankSum=0.786;QD=7.12;ReadPosRankSum=-2.110	chr3.100468178-100712334 ; 3q12.2 ; gain
ACACB	acetyl-Coenzyme A carboxylase beta	0.138889	AC=1;AF=0.500;AN=2;BaseQRankSum=-5.195;DP=500;Dels=0.00;EFF=NON_SYNONYMOUS_CODING(MODERATE|MISSENSE|Gag/Aag|E660K|2458|ACACB||CODING|NM_001093.3|11|1);FS=3.795;HaplotypeScore=6.0860;MLEAC=1;MLEAF=0.500;MQ=60.00;MQ0=0;MQRankSum=0.158;QD=14.01;ReadPosRankSum=1.079	chr12.109577201-109706030 ; 12q24.11 ; gain
ACER1	alkaline ceramidase 1	0.0833333	AC=2;AF=1.00;AN=2;BaseQRankSum=0.908;DP=500;Dels=0.00;EFF=NON_SYNONYMOUS_CODING(MODERATE|MISSENSE|Atc/Ttc|I121F|264|ACER1||CODING|NM_133492.2|4|1);FS=6.920;HaplotypeScore=13.1571;MLEAC=2;MLEAF=1.00;MQ=59.99;MQ0=0;MQRankSum=-0.092;QD=33.36;ReadPosRankSum=1.655	chr19.6306509-6333640 ; 19p13.3 ; loss
ACTN2	actinin, alpha 2	0.0555556	AC=1;AF=0.500;AN=2;BaseQRankSum=3.315;DP=500;Dels=0.00;EFF=NON_SYNONYMOUS_CODING(MODERATE|MISSENSE|gCg/gAg|A446E|894|ACTN2||CODING|NM_001103.2|12|1);FS=2.160;HaplotypeScore=9.4291;MLEAC=1;MLEAF=0.500;MQ=59.95;MQ0=0;MQRankSum=-1.166;QD=22.59;ReadPosRankSum=-1.253	chr1.236849769-236927558 ; 1q43 ; gain
ACY3	aspartoacylase (aminocyclase) 3	0.0555556	NA	chr11.67410025-67418130 ; 11q13.2 ; gain
ADAM19	ADAM metallopeptidase domain 19 (meltrin beta)	0.0555556	AC=1;AF=0.500;AN=2;BaseQRankSum=-3.328;DP=500;Dels=0.00;EFF=NON_SYNONYMOUS_CODING(MODERATE|MISSENSE|aAg/aTg|K225M|918|ADAM19||CODING|NM_033274.3|8|1);FS=3.861;HaplotypeScore=1.9952;MLEAC=1;MLEAF=0.500;MQ=60.00;MQ0=0;MQRankSum=0.803;QD=10.46;ReadPosRankSum=-0.454	chr5.156904311-157002783 ; 5q33.3 ; gain
ADAM32	ADAM metallopeptidase domain 32	0.111111	AC=1;AF=0.500;AN=2;BaseQRankSum=-13.868;DP=500;Dels=0.00;EFF=NON_SYNONYMOUS_CODING(MODERATE|MISSENSE|tCa/tTa|S737L|787|ADAM32||CODING|NM_145004.5|21|1);FS=9.170;HaplotypeScore=15.2435;MLEAC=1;MLEAF=0.500;MQ=59.92;MQ0=1;MQRankSum=0.572;QD=14.59;ReadPosRankSum=-0.513	chr8.38965049-39142436 ; 8p11.22 ; gain
ADAM8	ADAM metallopeptidase domain 8	0.0833333	AC=1;AF=0.500;AN=2;BaseQRankSum=-4.267;DP=500;Dels=0.00;EFF=NON_SYNONYMOUS_CODING(MODERATE|MISSENSE|Ggt/Agt|G718S|742|ADAM8||CODING|NM_001164489.1|20|1),SYNONYMOUS_CODING(LOW|SILENT|caG/caA|Q708|733|ADAM8||CODING|NM_001164490.1|19|1),SYNONYMOUS_CODING(LOW|SILENT|caG/caA|Q773|824|ADAM8||CODING|NM_001109.4|21|1);FS=3.887;HaplotypeScore=10.4840;MLEAC=1;MLEAF=0.500;MQ=60.00;MQ0=0;MQRankSum=0.588;QD=1…	chr10.135075919-135090407 ; 10q26.3 ; gain
ADAMTS12	ADAM metallopeptidase with thrombospondin type 1 motif, 12	0.333333	AC=1;AF=0.500;AN=2;BaseQRankSum=-9.962;DB;DP=500;Dels=0.00;EFF=NON_SYNONYMOUS_CODING(MODERATE|MISSENSE|Cca/Aca|P1414T|1594|ADAMTS12||CODING|NM_030955.2|21|1);FS=8.367;HaplotypeScore=4.7430;MLEAC=1;MLEAF=0.500;MQ=60.00;MQ0=0;MQRankSum=-0.900;QD=13.50;ReadPosRankSum=-0.254 , AC=1;AF=0.500;AN=2;BaseQRankSum=-4.897;DB;DP=500;Dels=0.00;EFF=NON_SYNONYMOUS_CODING(MODERATE|MISSENSE|Tgg/Cgg|W1177R|1594|AD…	chr5.33527286-33892124 ; 5p13.3 ; gain
ADAMTS16	ADAM metallopeptidase with thrombospondin type 1 motif, 16	0.111111	AC=1;AF=0.500;AN=2;BaseQRankSum=-4.627;DP=500;Dels=0.00;EFF=NON_SYNONYMOUS_CODING(MODERATE|MISSENSE|gCc/gTc|A216V|1224|ADAMTS16||CODING|NM_139056.2|4|1);FS=6.451;HaplotypeScore=3.7743;MLEAC=1;MLEAF=0.500;MQ=60.00;MQ0=0;MQRankSum=-0.468;QD=2.47;ReadPosRankSum=0.061	chr5.5140442-5320412 ; 5p15.32 ; gain
ADAMTS20	ADAM metallopeptidase with thrombospondin type 1 motif, 20	0.138889	AC=1;AF=0.500;AN=2;BaseQRankSum=-8.252;DP=500;Dels=0.00;EFF=NON_SYNONYMOUS_CODING(MODERATE|MISSENSE|aGg/aAg|R1496K|1910|ADAMTS20||CODING|NM_025003.3|30|1);FS=1.182;HaplotypeScore=5.7601;MLEAC=1;MLEAF=0.500;MQ=59.95;MQ0=0;MQRankSum=-1.108;QD=14.13;ReadPosRankSum=-0.935	chr12.43748011-43945724 ; 12q12 ; gain
ADCY8	adenylate cyclase 8 (brain)	0.111111	AC=1;AF=0.500;AN=2;BaseQRankSum=-8.543;DP=500;Dels=0.00;EFF=NON_SYNONYMOUS_CODING(MODERATE|MISSENSE|Gga/Aga|G470R|1251|ADCY8||CODING|NM_001115.2|5|1);FS=7.454;HaplotypeScore=5.4320;MLEAC=1;MLEAF=0.500;MQ=60.00;MQ0=0;MQRankSum=-0.293;QD=10.73;ReadPosRankSum=0.627	chr8.131792546-132052835 ; 8q24.22 ; gain
AFM	afamin	0.0555556	NA	chr4.74347461-74369718 ; 4q13.3 ; gain
AGAP2	ArfGAP with GTPase domain, ankyrin repeat and PH domain 2	0.0555556	AC=1;AF=0.500;AN=2;BaseQRankSum=-2.674;DP=500;Dels=0.00;EFF=DOWNSTREAM(MODIFIER|||||LOC100130776||NON_CODING|NR_027032.1||1),NON_SYNONYMOUS_CODING(MODERATE|MISSENSE|aGg/aTg|R406M|836|AGAP2||CODING|NM_014770.3|11|1),NON_SYNONYMOUS_CODING(MODERATE|MISSENSE|aGg/aTg|R742M|1192|AGAP2||CODING|NM_001122772.2|11|1);FS=2.586;HaplotypeScore=11.3418;MLEAC=1;MLEAF=0.500;MQ=60.00;MQ0=0;MQRankSum=1.629;QD=5.14…	chr12.58118075-58135944 ; 12q14.1 ; gain
AGBL2	ATP/GTP binding protein-like 2	0.0555556	AC=1;AF=0.500;AN=2;BaseQRankSum=0.267;DP=500;Dels=0.00;EFF=NON_SYNONYMOUS_CODING(MODERATE|MISSENSE|agG/agC|R354S|902|AGBL2||CODING|NM_024783.3|10|1);FS=9.747;HaplotypeScore=10.0348;MLEAC=1;MLEAF=0.500;MQ=60.00;MQ0=0;MQRankSum=0.455;QD=5.50;ReadPosRankSum=0.245	chr11.47681142-47736928 ; 11p11.2 ; gain
AGTPBP1	ATP/GTP binding protein 1	0.0555556	AC=1;AF=0.500;AN=2;BaseQRankSum=-7.321;DP=500;Dels=0.00;EFF=NON_SYNONYMOUS_CODING(MODERATE|MISSENSE|caA/caC|Q52H|1186|AGTPBP1||CODING|NM_015239.2|3|1);FS=0.347;HaplotypeScore=7.2531;MLEAC=1;MLEAF=0.500;MQ=60.00;MQ0=0;MQRankSum=-0.406;QD=19.03;ReadPosRankSum=-0.957	chr9.88161453-88356944 ; 9q21.33 ; gain
AGTR1	angiotensin II receptor, type 1	0.111111	AC=1;AF=0.500;AN=2;BaseQRankSum=-2.567;DP=500;Dels=0.00;EFF=NON_SYNONYMOUS_CODING(MODERATE|MISSENSE|caT/caA|H166Q|359|AGTR1||CODING|NM_000685.4|3|1),NON_SYNONYMOUS_CODING(MODERATE|MISSENSE|caT/caA|H166Q|359|AGTR1||CODING|NM_009585.3|2|1),NON_SYNONYMOUS_CODING(MODERATE|MISSENSE|caT/caA|H195Q|388|AGTR1||CODING|NM_032049.3|3|1),NON_SYNONYMOUS_CODING(MODERATE|MISSENSE|caT/caA|H201Q|394|AGTR1||CODING|…	chr3.148415657-148460790 ; 3q24 ; gain
AIF1L	allograft inflammatory factor 1-like	0.277778	AC=2;AF=1.00;AN=2;BaseQRankSum=-0.154;DB;DP=485;Dels=0.00;EFF=INTRON(MODIFIER||||102|AIF1L||CODING|NM_001185096.1|2|1),INTRON(MODIFIER||||150|AIF1L||CODING|NM_031426.3|2|1),INTRON(MODIFIER|||||AIF1L||CODING|NR_033701.1|2|1),NON_SYNONYMOUS_CODING(MODERATE|MISSENSE|Tgc/Cgc|C50R|176|AIF1L||CODING|NM_001185095.1|3|1);FS=0.000;HaplotypeScore=8.3586;MLEAC=2;MLEAF=1.00;MQ=59.94;MQ0=1;MQRankSum=-0.068;QD…	chr9.133971862-133998539 ; 9q34.12 ; loss
ALDH6A1	aldehyde dehydrogenase 6 family, member A1	0.0833333	AC=2;AF=1.00;AN=2;BaseQRankSum=0.669;DP=500;Dels=0.00;EFF=NON_SYNONYMOUS_CODING(MODERATE|MISSENSE|tGg/tTg|W93L|535|ALDH6A1||CODING|NM_005589.2|4|1);FS=0.000;HaplotypeScore=12.1340;MLEAC=2;MLEAF=1.00;MQ=60.00;MQ0=0;MQRankSum=-0.956;QD=32.01;ReadPosRankSum=-1.020	chr14.74526871-74551196 ; 14q24.3 ; gain
ANK1	ankyrin 1, erythrocytic	0.111111	AC=1;AF=0.500;AN=2;BaseQRankSum=-13.382;DB;DP=500;Dels=0.00;EFF=NON_SYNONYMOUS_CODING(MODERATE|MISSENSE|gCa/gTa|A1462V|1719|ANK1||CODING|NM_020477.2|36|1),NON_SYNONYMOUS_CODING(MODERATE|MISSENSE|gCa/gTa|A1462V|1856|ANK1||CODING|NM_020475.2|36|1),NON_SYNONYMOUS_CODING(MODERATE|MISSENSE|gCa/gTa|A1462V|1880|ANK1||CODING|NM_000037.3|36|1),NON_SYNONYMOUS_CODING(MODERATE|MISSENSE|gCa/gTa|A1462V|1881|AN…	chr8.41510743-41754280 ; 8p11.21 ; gain
ANK3	ankyrin 3, node of Ranvier (ankyrin G)	0.111111	AC=1;AF=0.500;AN=2;BaseQRankSum=3.290;DB;DP=500;Dels=0.00;EFF=INTRON(MODIFIER||||1001|ANK3||CODING|NM_001149.3|13|1),INTRON(MODIFIER||||1861|ANK3||CODING|NM_001204403.1|36|1),INTRON(MODIFIER||||1868|ANK3||CODING|NM_001204404.1|36|1),NON_SYNONYMOUS_CODING(MODERATE|MISSENSE|Atc/Gtc|I3117V|4377|ANK3||CODING|NM_020987.3|37|1);FS=9.015;HaplotypeScore=7.7639;MLEAC=1;MLEAF=0.500;MQ=60.00;MQ0=0;MQRankSum…	chr10.61786055-62493284 ; 10q21.2 ; gain
ANKDD1A	ankyrin repeat and death domain containing 1A	0.472222	AC=1;AF=0.500;AN=2;BaseQRankSum=12.606;DB;DP=500;Dels=0.00;EFF=NON_SYNONYMOUS_CODING(MODERATE|MISSENSE|Aag/Gag|K355E|522|ANKDD1A||CODING|NM_182703.3|11|1);FS=1.508;HaplotypeScore=8.9713;MLEAC=1;MLEAF=0.500;MQ=60.15;MQ0=0;MQRankSum=0.740;QD=14.01;ReadPosRankSum=0.184	chr15.65204100-65251041 ; 15q22.31 ; gain
ANKMY1	ankyrin repeat and MYND domain containing 1	0.0555556	AC=1;AF=0.500;AN=2;BaseQRankSum=5.620;DP=437;Dels=0.00;EFF=NON_SYNONYMOUS_CODING(MODERATE|MISSENSE|aCg/aTg|T615M|717|ANKMY1||CODING|NM_017844.2|11|1),NON_SYNONYMOUS_CODING(MODERATE|MISSENSE|aCg/aTg|T839M|941|ANKMY1||CODING|NM_016552.2|14|1);FS=0.000;HaplotypeScore=6.2417;MLEAC=1;MLEAF=0.500;MQ=60.00;MQ0=0;MQRankSum=0.946;QD=15.31;ReadPosRankSum=-0.479	chr2.241418838-241497405 ; 2q37.3 ; gain
ANKRD30A	ankyrin repeat domain 30A	0.111111	AC=1;AF=0.500;AN=2;BaseQRankSum=13.098;DB;DP=500;Dels=0.00;EFF=NON_SYNONYMOUS_CODING(MODERATE|MISSENSE|aCg/aTg|T125M|1341|ANKRD30A||CODING|NM_052997.2|4|1);FS=0.709;HaplotypeScore=0.7887;MLEAC=1;MLEAF=0.500;MQ=59.98;MQ0=0;MQRankSum=-1.345;QD=11.78;ReadPosRankSum=-0.202	chr10.37414784-37521495 ; 10p11.21 ; loss
ANKRD34A	ankyrin repeat domain 34A	0.138889	NA	chr1.145470507-145475647 ; 1q21.1 ; gain
ANKRD36	ankyrin repeat domain 36; similar to ankyrin repeat domain 36	0.583333	AC=1;AF=0.500;AN=2;BaseQRankSum=1.250;DB;DP=500;Dels=0.00;EFF=NON_SYNONYMOUS_CODING(MODERATE|MISSENSE|Gtg/Atg|V1157M|1941|ANKRD36||CODING|NM_001164315.1|58|1);FS=3.663;HaplotypeScore=7.2108;MLEAC=1;MLEAF=0.500;MQ=59.77;MQ0=0;MQRankSum=0.139;QD=14.75;ReadPosRankSum=1.717	chr2.97779232-97930257 ; 2q11.2 ; loss
ANPEP	alanyl (membrane) aminopeptidase	0.194444	AC=1;AF=0.500;AN=2;BaseQRankSum=-2.171;DB;DP=500;Dels=0.00;EFF=NON_SYNONYMOUS_CODING(MODERATE|MISSENSE|gCg/gTg|A311V|967|ANPEP||CODING|NM_001150.2|5|1);FS=1.892;HaplotypeScore=9.1279;MLEAC=1;MLEAF=0.500;MQ=60.00;MQ0=0;MQRankSum=0.776;QD=12.84;ReadPosRankSum=0.759	chr15.90328125-90358072 ; 15q26.1 ; gain
APAF1	apoptotic peptidase activating factor 1	0.222222	AC=1;AF=0.500;AN=2;BaseQRankSum=4.445;DP=493;Dels=0.00;EFF=INTRON(MODIFIER||||338|APAF1||CODING|NM_181869.1|7|1),NON_SYNONYMOUS_CODING(MODERATE|MISSENSE|gAg/gCg|E328A|1194|APAF1||CODING|NM_001160.2|8|1),NON_SYNONYMOUS_CODING(MODERATE|MISSENSE|gAg/gCg|E328A|1237|APAF1||CODING|NM_013229.2|8|1),NON_SYNONYMOUS_CODING(MODERATE|MISSENSE|gAg/gCg|E339A|1205|APAF1||CODING|NM_181868.1|8|1),NON_SYNONYMOUS_C…	chr12.99039077-99129211 ; 12q23.1 ; gain
APBB1IP	amyloid beta (A4) precursor protein-binding, family B, member 1 interacting protein	0.0833333	AC=1;AF=0.500;AN=2;BaseQRankSum=-9.947;DP=500;Dels=0.00;EFF=NON_SYNONYMOUS_CODING(MODERATE|MISSENSE|Ctg/Atg|L199M|666|APBB1IP||CODING|NM_019043.3|7|1);FS=2.031;HaplotypeScore=8.5697;MLEAC=1;MLEAF=0.500;MQ=60.00;MQ0=0;MQRankSum=-1.966;QD=13.70;ReadPosRankSum=2.235	chr10.26727265-26856732 ; 10p12.1 ; gain
APEH	N-acylaminoacyl-peptide hydrolase	0.444444	AC=2;AF=1.00;AN=2;BaseQRankSum=2.124;DB;DP=500;Dels=0.00;EFF=DOWNSTREAM(MODIFIER||||732|APEH||CODING|NM_001640.3||1),NON_SYNONYMOUS_CODING(MODERATE|MISSENSE|Cgc/Tgc|R703C|725|MST1||CODING|NM_020998.3|18|1);FS=2.574;HaplotypeScore=7.9532;MLEAC=2;MLEAF=1.00;MQ=59.41;MQ0=0;MQRankSum=-0.713;QD=33.81;ReadPosRankSum=-1.631	chr3.49711434-49720934 ; 3p21.31 ; gain
APOB	apolipoprotein B (including Ag(x) antigen)	0.111111	AC=1;AF=0.500;AN=2;BaseQRankSum=3.619;DB;DP=500;Dels=0.00;EFF=NON_SYNONYMOUS_CODING(MODERATE|MISSENSE|cGg/cCg|R3507P|4563|APOB||CODING|NM_000384.2|26|1);FS=1.920;HaplotypeScore=5.9637;MLEAC=1;MLEAF=0.500;MQ=60.00;MQ0=0;MQRankSum=1.581;QD=11.21;ReadPosRankSum=-1.388	chr2.21224300-21266945 ; 2p24.1 ; loss
AQP7	aquaporin 7	0.111111	AC=1;AF=0.500;AN=2;BaseQRankSum=0.595;DP=500;Dels=0.00;EFF=NON_SYNONYMOUS_CODING(MODERATE|MISSENSE|aAc/aTc|N71I|342|AQP7||CODING|NM_001170.1|4|1);FS=5.441;HaplotypeScore=1.5661;MLEAC=1;MLEAF=0.500;MQ=49.88;MQ0=1;MQRankSum=-10.185;QD=3.64;ReadPosRankSum=0.866	chr9.33384947-33402517 ; 9p13.3 ; gain
AQR	aquarius homolog (mouse)	0.111111	AC=1;AF=0.500;AN=2;BaseQRankSum=-12.784;DP=500;Dels=0.00;EFF=NON_SYNONYMOUS_CODING(MODERATE|MISSENSE|Cac/Tac|H548Y|1485|AQR||CODING|NM_014691.2|17|1);FS=0.000;HaplotypeScore=2.6598;MLEAC=1;MLEAF=0.500;MQ=60.00;MQ0=0;MQRankSum=-1.521;QD=12.65;ReadPosRankSum=-0.277	chr15.35148551-35261995 ; 15q14 ; gain
ARF4	ADP-ribosylation factor 4	0.25	NA	chr3.57557089-57583215 ; 3p14.3 ; gain
ARHGAP21	Rho GTPase activating protein 21	0.0833333	AC=1;AF=0.500;AN=2;BaseQRankSum=13.958;DP=498;Dels=0.00;EFF=NON_SYNONYMOUS_CODING(MODERATE|MISSENSE|cGg/cTg|R1159L|1958|ARHGAP21||CODING|NM_020824.3|17|1);FS=3.454;HaplotypeScore=7.2724;MLEAC=1;MLEAF=0.500;MQ=55.21;MQ0=0;MQRankSum=-0.615;QD=11.14;ReadPosRankSum=0.409	chr10.24872537-25012597 ; 10p12.1 ; gain
ARHGAP22	Rho GTPase activating protein 22	0.111111	NA	chr10.49654067-49864310 ; 10q11.22 ; gain
ARHGAP26	Rho GTPase activating protein 26	0.361111	AC=2;AF=1.00;AN=2;BaseQRankSum=-3.660;DP=500;Dels=0.00;EFF=NON_SYNONYMOUS_CODING(MODERATE|MISSENSE|aaG/aaT|K184N|759|ARHGAP26||CODING|NM_001135608.1|6|1),NON_SYNONYMOUS_CODING(MODERATE|MISSENSE|aaG/aaT|K184N|814|ARHGAP26||CODING|NM_015071.4|6|1);FS=12.431;HaplotypeScore=11.5120;MLEAC=2;MLEAF=1.00;MQ=59.88;MQ0=1;MQRankSum=2.752;QD=34.05;ReadPosRankSum=0.563	chr5.142150291-142608572 ; 5q31.3 ; loss
ARHGAP32	Rho GTPase-activating protein	0.0833333	AC=1;AF=0.500;AN=2;BaseQRankSum=-9.026;DP=500;Dels=0.00;EFF=NON_SYNONYMOUS_CODING(MODERATE|MISSENSE|tCt/tTt|S555F|1738|ARHGAP32||CODING|NM_014715.3|11|1),NON_SYNONYMOUS_CODING(MODERATE|MISSENSE|tCt/tTt|S904F|2087|ARHGAP32||CODING|NM_001142685.1|20|1);FS=2.828;HaplotypeScore=6.6193;MLEAC=1;MLEAF=0.500;MQ=60.00;MQ0=0;MQRankSum=1.972;QD=11.44;ReadPosRankSum=-0.345	chr11.128834954-129062093 ; 11q24.3 ; gain
ARHGEF11	Rho guanine nucleotide exchange factor (GEF) 11	0.111111	AC=1;AF=0.500;AN=2;BaseQRankSum=-5.185;DP=500;Dels=0.00;EFF=NON_SYNONYMOUS_CODING(MODERATE|MISSENSE|Ctg/Atg|L369M|1522|ARHGEF11||CODING|NM_014784.3|13|1),NON_SYNONYMOUS_CODING(MODERATE|MISSENSE|Ctg/Atg|L409M|1562|ARHGEF11||CODING|NM_198236.2|14|1);FS=1.825;HaplotypeScore=5.5730;MLEAC=1;MLEAF=0.500;MQ=60.00;MQ0=0;MQRankSum=0.364;QD=23.58;ReadPosRankSum=0.090	chr1.156904631-157015162 ; 1q23.1 ; gain
ARHGEF2	Rho/Rac guanine nucleotide exchange factor (GEF) 2	0.111111	AC=2;AF=1.00;AN=2;BaseQRankSum=-3.091;DP=500;Dels=0.00;EFF=NON_SYNONYMOUS_CODING(MODERATE|MISSENSE|Cgg/Tgg|R856W|958|ARHGEF2||CODING|NM_004723.3|20|1),NON_SYNONYMOUS_CODING(MODERATE|MISSENSE|Cgg/Tgg|R883W|985|ARHGEF2||CODING|NM_001162384.1|20|1),NON_SYNONYMOUS_CODING(MODERATE|MISSENSE|Cgg/Tgg|R884W|986|ARHGEF2||CODING|NM_001162383.1|20|1);FS=0.000;HaplotypeScore=15.7720;MLEAC=2;MLEAF=1.00;MQ=60.0…	chr1.155916629-155948336 ; 1q22 ; gain
ARHGEF26	NA	0.111111	AC=1;AF=0.500;AN=2;BaseQRankSum=0.110;DP=500;Dels=0.00;EFF=NON_SYNONYMOUS_CODING(MODERATE|MISSENSE|Gcc/Acc|A624T|791|ARHGEF26||CODING|NM_001251963.1|10|1),NON_SYNONYMOUS_CODING(MODERATE|MISSENSE|Gcc/Acc|A624T|871|ARHGEF26||CODING|NM_001251962.1|10|1),NON_SYNONYMOUS_CODING(MODERATE|MISSENSE|Gcc/Acc|A624T|871|ARHGEF26||CODING|NM_015595.3|10|1);FS=1.553;HaplotypeScore=3.4596;MLEAC=1;MLEAF=0.500;MQ=6…	chr3.153838791-153975616 ; 3q25.2 ; gain
ARHGEF37	NA	0.111111	AC=1;AF=0.500;AN=2;BaseQRankSum=-13.755;DB;DP=500;Dels=0.00;EFF=NON_SYNONYMOUS_CODING(MODERATE|MISSENSE|Agt/Cgt|S518R|675|ARHGEF37||CODING|NM_001001669.2|11|1);FS=0.712;HaplotypeScore=7.3060;MLEAC=1;MLEAF=0.500;MQ=60.00;MQ0=0;MQRankSum=0.255;QD=12.02;ReadPosRankSum=0.374	chr5.148961134-149014527 ; 5q32 ; loss
ARHGEF4	Rho guanine nucleotide exchange factor (GEF) 4	0.0833333	AC=1;AF=0.500;AN=2;BaseQRankSum=-4.779;DB;DP=500;Dels=0.00;EFF=NON_SYNONYMOUS_CODING(MODERATE|MISSENSE|cAg/cGg|Q283R|670|ARHGEF4||CODING|NM_032995.1|7|1),NON_SYNONYMOUS_CODING(MODERATE|MISSENSE|cAg/cGg|Q283R|690|ARHGEF4||CODING|NM_015320.2|7|1);FS=0.701;HaplotypeScore=3.9922;MLEAC=1;MLEAF=0.500;MQ=60.00;MQ0=0;MQRankSum=-2.161;QD=13.43;ReadPosRankSum=-2.348	chr2.131674223-131804836 ; 2q21.1 ; gain
ARID1B	AT rich interactive domain 1B (SWI1-like)	0.194444	NA	chr6.157099063-157531913 ; 6q25.3 ; loss
ARID2	AT rich interactive domain 2 (ARID, RFX-like)	0.111111	AC=1;AF=0.500;AN=2;BaseQRankSum=-9.847;DP=500;Dels=0.00;EFF=NON_SYNONYMOUS_CODING(MODERATE|MISSENSE|aGa/aAa|R30K|1835|ARID2||CODING|NM_152641.2|1|1),UPSTREAM(MODIFIER|||||LOC400027||NON_CODING|NR_028408.1||1);FS=1.947;HaplotypeScore=13.8780;MLEAC=1;MLEAF=0.500;MQ=60.00;MQ0=0;MQRankSum=0.304;QD=13.31;ReadPosRankSum=-0.714	chr12.46123619-46301819 ; 12q12 ; gain
ARIH2	ariadne homolog 2 (Drosophila)	0.111111	NA	chr3.48956280-49022971 ; 3p21.31 ; gain
ARL6	ADP-ribosylation factor-like 6	0.138889	AC=1;AF=0.500;AN=2;BaseQRankSum=-5.068;DP=500;Dels=0.00;EFF=NON_SYNONYMOUS_CODING(MODERATE|MISSENSE|Gtg/Ttg|V143L|186|ARL6||CODING|NM_032146.3|7|1),NON_SYNONYMOUS_CODING(MODERATE|MISSENSE|Gtg/Ttg|V143L|186|ARL6||CODING|NM_177976.1|7|1);FS=3.912;HaplotypeScore=2.8400;MLEAC=1;MLEAF=0.500;MQ=60.00;MQ0=0;MQRankSum=1.112;QD=20.86;ReadPosRankSum=1.223	chr3.97483594-97517373 ; 3q11.2 ; gain
ARPP21	cyclic AMP-regulated phosphoprotein, 21 kD	0.0833333	AC=1;AF=0.500;AN=2;BaseQRankSum=-13.069;DP=500;Dels=0.00;EFF=NON_SYNONYMOUS_CODING(MODERATE|MISSENSE|Ccg/Acg|P567T|793|ARPP21||CODING|NM_001267617.1|16|1),NON_SYNONYMOUS_CODING(MODERATE|MISSENSE|Ccg/Acg|P586T|812|ARPP21||CODING|NM_016300.4|17|1),NON_SYNONYMOUS_CODING(MODERATE|MISSENSE|Ccg/Acg|P587T|813|ARPP21||CODING|NM_001267619.1|16|1);FS=10.782;HaplotypeScore=5.5736;MLEAC=1;MLEAF=0.500;MQ=60.0…	chr3.35680665-35835988 ; 3p22.3 ; gain
ATAD5	ATPase family, AAA domain containing 5	0.0833333	AC=1;AF=0.500;AN=2;BaseQRankSum=4.672;DP=500;Dels=0.00;EFF=NON_SYNONYMOUS_CODING(MODERATE|MISSENSE|tAt/tTt|Y514F|1844|ATAD5||CODING|NM_024857.3|2|1);FS=3.321;HaplotypeScore=6.4494;MLEAC=1;MLEAF=0.500;MQ=59.99;MQ0=0;MQRankSum=0.181;QD=14.01;ReadPosRankSum=0.700	chr17.29159022-29222295 ; 17q11.2 ; gain
ATE1	arginyltransferase 1	0.0833333	AC=1;AF=0.500;AN=2;BaseQRankSum=11.357;DP=500;Dels=0.00;EFF=INTRON(MODIFIER||||518|ATE1||CODING|NM_001001976.1|7|1),NON_SYNONYMOUS_CODING(MODERATE|MISSENSE|tAt/tGt|Y298C|518|ATE1||CODING|NM_007041.2|7|1);FS=1.077;HaplotypeScore=6.7437;MLEAC=1;MLEAF=0.500;MQ=59.94;MQ0=0;MQRankSum=-0.029;QD=15.53;ReadPosRankSum=0.644	chr10.123502624-123687546 ; 10q26.13 ; gain
ATF6	activating transcription factor 6	0.138889	NA	chr1.161736033-161933860 ; 1q23.3 ; gain
ATG2A	ATG2 autophagy related 2 homolog A (S. cerevisiae)	0.333333	NA	chr11.64662003-64684722 ; 11q13.1 ; gain
ATP10A	ATPase, class V, type 10A	0.138889	AC=1;AF=0.500;AN=2;BaseQRankSum=-13.601;DP=500;Dels=0.00;EFF=NON_SYNONYMOUS_CODING(MODERATE|MISSENSE|aGc/aAc|S483N|1499|ATP10A||CODING|NM_024490.3|8|1);FS=19.563;HaplotypeScore=11.3935;MLEAC=1;MLEAF=0.500;MQ=60.00;MQ0=0;MQRankSum=-0.586;QD=13.19;ReadPosRankSum=-0.736	chr15.25923859-26108349 ; 15q12 ; gain
ATP12A	ATPase, H+/K+ transporting, nongastric, alpha polypeptide	0.111111	AC=2;AF=1.00;AN=2;BaseQRankSum=1.421;DB;DP=500;Dels=0.00;EFF=NON_SYNONYMOUS_CODING(MODERATE|MISSENSE|cGc/cAc|R517H|1039|ATP12A||CODING|NM_001676.5|12|1),NON_SYNONYMOUS_CODING(MODERATE|MISSENSE|cGc/cAc|R523H|1045|ATP12A||CODING|NM_001185085.1|12|1);FS=0.000;HaplotypeScore=2.4167;MLEAC=2;MLEAF=1.00;MQ=59.99;MQ0=0;MQRankSum=0.154;QD=32.74;ReadPosRankSum=1.577	chr13.25254548-25285923 ; 13q12.12 ; gain
ATP1A4	ATPase, Na+/K+ transporting, alpha 4 polypeptide	0.138889	AC=1;AF=0.500;AN=2;BaseQRankSum=9.686;DP=500;Dels=0.00;EFF=NON_SYNONYMOUS_CODING(MODERATE|MISSENSE|Cgg/Ggg|R503G|1029|ATP1A4||CODING|NM_144699.3|11|1);FS=24.724;HaplotypeScore=5.7122;MLEAC=1;MLEAF=0.500;MQ=60.00;MQ0=0;MQRankSum=-0.565;QD=10.68;ReadPosRankSum=0.025	chr1.160121351-160156767 ; 1q23.2 ; gain
ATP2B2	ATPase, Ca++ transporting, plasma membrane 2	0.0555556	AC=1;AF=0.500;AN=2;BaseQRankSum=-3.254;DP=500;Dels=0.00;EFF=NON_SYNONYMOUS_CODING(MODERATE|MISSENSE|gGg/gAg|G581E|1198|ATP2B2||CODING|NM_001683.3|10|1),NON_SYNONYMOUS_CODING(MODERATE|MISSENSE|gGg/gAg|G626E|1243|ATP2B2||CODING|NM_001001331.2|13|1);FS=0.719;HaplotypeScore=6.7096;MLEAC=1;MLEAF=0.500;MQ=59.99;MQ0=0;MQRankSum=0.685;QD=10.34;ReadPosRankSum=-0.559	chr3.10365706-10547268 ; 3p25.3 ; gain
ATP5S	ATP synthase, H+ transporting, mitochondrial F0 complex, subunit s (factor B)	0.722222	AC=1;AF=0.500;AN=2;BaseQRankSum=11.966;DB;DP=500;Dels=0.00;EFF=EXON(MODIFIER|||||ATP5S||CODING|NR_033761.1|3|1),NON_SYNONYMOUS_CODING(MODERATE|MISSENSE|cCg/cTg|P18L|127|ATP5S||CODING|NM_001003805.2|2|1),NON_SYNONYMOUS_CODING(MODERATE|MISSENSE|cCg/cTg|P18L|136|ATP5S||CODING|NM_015684.3|2|1),NON_SYNONYMOUS_CODING(MODERATE|MISSENSE|cCg/cTg|P18L|215|ATP5S||CODING|NM_001003803.2|2|1);FS=1.455;Haplotyp…	chr14.50779046-50792946 ; 14q21.3 ; gain
ATR	ataxia telangiectasia and Rad3 related; similar to ataxia telangiectasia and Rad3 related protein	0.305556	AC=1;AF=0.500;AN=2;BaseQRankSum=11.862;DB;DP=500;Dels=0.00;EFF=NON_SYNONYMOUS_CODING(MODERATE|MISSENSE|cGa/cAa|R2425Q|2644|ATR||CODING|NM_001184.3|43|1);FS=0.353;HaplotypeScore=5.9899;MLEAC=1;MLEAF=0.500;MQ=59.94;MQ0=1;MQRankSum=-0.993;QD=9.65;ReadPosRankSum=1.747	chr3.142168076-142297668 ; 3q23 ; gain
ATXN1	ataxin 1	0.138889	AC=1;AF=0.500;AN=2;BaseQRankSum=4.191;DP=500;Dels=0.00;EFF=NON_SYNONYMOUS_CODING(MODERATE|MISSENSE|Gag/Aag|E725K|815|ATXN1||CODING|NM_000332.3|9|1),NON_SYNONYMOUS_CODING(MODERATE|MISSENSE|Gag/Aag|E725K|815|ATXN1||CODING|NM_001128164.1|8|1);FS=0.333;HaplotypeScore=24.4698;MLEAC=1;MLEAF=0.500;MQ=59.94;MQ0=1;MQRankSum=-2.622;QD=13.61;ReadPosRankSum=0.241	chr6.16299342-16761721 ; 6p22.3 ; gain
AZI1	5-azacytidine induced 1	0.194444	AC=1;AF=0.500;AN=2;BaseQRankSum=-5.801;DB;DP=500;Dels=0.00;EFF=NON_SYNONYMOUS_CODING(MODERATE|MISSENSE|cCa/cTa|P418L|1044|AZI1||CODING|NM_001009811.2|11|1),NON_SYNONYMOUS_CODING(MODERATE|MISSENSE|cCa/cTa|P418L|1080|AZI1||CODING|NM_014984.2|11|1);FS=9.348;HaplotypeScore=7.5716;MLEAC=1;MLEAF=0.500;MQ=60.00;MQ0=0;MQRankSum=0.452;QD=13.50;ReadPosRankSum=4.060	chr17.79163392-79196751 ; 17q25.3 ; gain
BACE1	beta-site APP-cleaving enzyme 1	0.111111	AC=1;AF=0.500;AN=2;BaseQRankSum=4.890;DP=500;Dels=0.00;EFF=DOWNSTREAM(MODIFIER||||376|BACE1||CODING|NM_001207049.1||1),DOWNSTREAM(MODIFIER||||401|BACE1||CODING|NM_001207048.1||1),DOWNSTREAM(MODIFIER||||432|BACE1||CODING|NM_138973.3||1),DOWNSTREAM(MODIFIER||||457|BACE1||CODING|NM_138971.3||1),DOWNSTREAM(MODIFIER||||476|BACE1||CODING|NM_138972.3||1),DOWNSTREAM(MODIFIER||||501|BACE1||CODING|NM_01210…	chr11.117156401-117186972 ; 11q23.3 ; gain
BAI3	brain-specific angiogenesis inhibitor 3	0.0833333	AC=2;AF=1.00;AN=2;BaseQRankSum=-0.659;DP=500;Dels=0.00;EFF=NON_SYNONYMOUS_CODING(MODERATE|MISSENSE|gGa/gCa|G21A|1522|BAI3||CODING|NM_001704.2|3|1);FS=1.796;HaplotypeScore=5.2283;MLEAC=2;MLEAF=1.00;MQ=60.00;MQ0=0;MQRankSum=0.150;QD=34.53;ReadPosRankSum=1.268	chr6.69345631-70099403 ; 6q12 ; gain
BARX2	BARX homeobox 2	0.0833333	AC=1;AF=0.500;AN=2;BaseQRankSum=-3.024;DP=500;Dels=0.00;EFF=NON_SYNONYMOUS_CODING(MODERATE|MISSENSE|Gtc/Ttc|V87F|279|BARX2||CODING|NM_003658.4|2|1);FS=2.629;HaplotypeScore=18.8358;MLEAC=1;MLEAF=0.500;MQ=60.00;MQ0=0;MQRankSum=-0.830;QD=5.53;ReadPosRankSum=-0.385	chr11.129245880-129322174 ; 11q24.3 ; gain
BBS1	Bardet-Biedl syndrome 1	0.0833333	AC=1;AF=0.500;AN=2;BaseQRankSum=8.271;DP=500;Dels=0.00;EFF=NON_SYNONYMOUS_CODING(MODERATE|MISSENSE|Cgt/Tgt|R359C|593|BBS1||CODING|NM_024649.4|11|1);FS=0.000;HaplotypeScore=3.3108;MLEAC=1;MLEAF=0.500;MQ=60.00;MQ0=0;MQRankSum=0.583;QD=13.55;ReadPosRankSum=-0.114	chr11.66278118-66301084 ; 11q13.2 ; gain
BBX	bobby sox homolog (Drosophila)	0.111111	AC=1;AF=0.500;AN=2;BaseQRankSum=-1.842;DP=500;Dels=0.00;EFF=INTRON(MODIFIER||||628|BBX||CODING|NM_001276286.1|10|1),NON_SYNONYMOUS_CODING(MODERATE|MISSENSE|gaG/gaC|E541D|911|BBX||CODING|NM_020235.6|11|1),NON_SYNONYMOUS_CODING(MODERATE|MISSENSE|gaG/gaC|E541D|941|BBX||CODING|NM_001142568.2|11|1);FS=10.352;HaplotypeScore=1.5115;MLEAC=1;MLEAF=0.500;MQ=59.95;MQ0=0;MQRankSum=-0.163;QD=8.95;ReadPosRankS…	chr3.107241782-107530176 ; 3q13.12 ; gain
BCAM	basal cell adhesion molecule (Lutheran blood group)	0.138889	NA	chr19.45312315-45324678 ; 19q13.32 ; gain
BCAS1	breast carcinoma amplified sequence 1	0.222222	AC=1;AF=0.500;AN=2;BaseQRankSum=6.877;DB;DP=500;Dels=0.00;EFF=NON_SYNONYMOUS_CODING(MODERATE|MISSENSE|Tcc/Ccc|S583P|584|BCAS1||CODING|NM_003657.2|12|1);FS=9.031;HaplotypeScore=7.3784;MLEAC=1;MLEAF=0.500;MQ=60.00;MQ0=0;MQRankSum=0.080;QD=15.36;ReadPosRankSum=0.604	chr20.52560078-52687304 ; 20q13.2 ; loss
BCL9	B-cell CLL/lymphoma 9	0.166667	NA	chr1.147013181-147098015 ; 1q21.2 ; gain
BHMT	betaine-homocysteine methyltransferase	0.0555556	AC=1;AF=0.500;AN=2;BaseQRankSum=-12.699;DP=500;Dels=0.00;EFF=NON_SYNONYMOUS_CODING(MODERATE|MISSENSE|Cac/Aac|H52N|406|BHMT||CODING|NM_001713.2|2|1);FS=9.658;HaplotypeScore=5.5224;MLEAC=1;MLEAF=0.500;MQ=59.99;MQ0=0;MQRankSum=0.342;QD=13.96;ReadPosRankSum=-0.805	chr5.78407603-78428113 ; 5q14.1 ; gain
BIN2	bridging integrator 2	0.0555556	AC=1;AF=0.500;AN=2;BaseQRankSum=-8.258;DP=500;Dels=0.00;EFF=NON_SYNONYMOUS_CODING(MODERATE|MISSENSE|cAa/cGa|Q305R|565|BIN2||CODING|NM_016293.2|10|1);FS=0.325;HaplotypeScore=12.1327;MLEAC=1;MLEAF=0.500;MQ=58.27;MQ0=0;MQRankSum=1.914;QD=12.63;ReadPosRankSum=-1.433	chr12.51674821-51717938 ; 12q13.13 ; gain
BIRC6	baculoviral IAP repeat-containing 6	0.277778	AC=1;AF=0.500;AN=2;BaseQRankSum=-5.710;DP=500;Dels=0.00;EFF=NON_SYNONYMOUS_CODING(MODERATE|MISSENSE|Tta/Ata|L178I|4857|BIRC6||CODING|NM_016252.3|3|1);FS=17.053;HaplotypeScore=6.7806;MLEAC=1;MLEAF=0.500;MQ=58.73;MQ0=0;MQRankSum=-5.499;QD=3.34;ReadPosRankSum=10.150 , AC=1;AF=0.500;AN=2;BaseQRankSum=-4.269;DP=500;Dels=0.00;EFF=NON_SYNONYMOUS_CODING(MODERATE|MISSENSE|Gta/Ata|V181I|4857|BIRC6||CODING|…	chr2.32582095-32843965 ; 2p22.3 ; loss
BIRC7	baculoviral IAP repeat-containing 7	0.0555556	NA	chr20.61867275-61871854 ; 20q13.33 ; gain
BIRC8	baculoviral IAP repeat-containing 8	0.0833333	NA	chr19.53792853-53794875 ; 19q13.42 ; gain
BMPER	BMP binding endothelial regulator	0.0555556	AC=1;AF=0.500;AN=2;BaseQRankSum=-9.903;DP=500;Dels=0.00;EFF=NON_SYNONYMOUS_CODING(MODERATE|MISSENSE|Cca/Aca|P654T|685|BMPER||CODING|NM_133468.4|16|1);FS=0.768;HaplotypeScore=8.2367;MLEAC=1;MLEAF=0.500;MQ=60.00;MQ0=0;MQRankSum=0.128;QD=18.66;ReadPosRankSum=1.606	chr7.33944522-34195484 ; 7p14.3 ; loss
BPI	bactericidal/permeability-increasing protein	0.666667	AC=1;AF=0.500;AN=2;BaseQRankSum=2.386;DB;DP=500;Dels=0.00;EFF=NON_SYNONYMOUS_CODING(MODERATE|MISSENSE|Gag/Aag|E216K|487|BPI||CODING|NM_001725.2|6|1);FS=3.659;HaplotypeScore=5.2885;MLEAC=1;MLEAF=0.500;MQ=60.00;MQ0=0;MQRankSum=-0.379;QD=21.06;ReadPosRankSum=0.461	chr20.36932551-36965905 ; 20q11.23 ; gain
BRCA1	breast cancer 1, early onset	0.0833333	AC=1;AF=0.500;AN=2;BaseQRankSum=0.979;DB;DP=498;Dels=0.00;EFF=EXON(MODIFIER|||||BRCA1||CODING|NR_027676.1|10|1),INTRON(MODIFIER||||699|BRCA1||CODING|NM_007299.3|10|1),INTRON(MODIFIER||||759|BRCA1||CODING|NM_007298.3|9|1),NON_SYNONYMOUS_CODING(MODERATE|MISSENSE|Caa/Gaa|Q712E|1816|BRCA1||CODING|NM_007297.3|9|1),NON_SYNONYMOUS_CODING(MODERATE|MISSENSE|Caa/Gaa|Q759E|1863|BRCA1||CODING|NM_007294.3|10|…	chr17.41196311-41277500 ; 17q21.31 ; gain
BRD9	bromodomain containing 9	0.416667	AC=1;AF=0.500;AN=2;BaseQRankSum=-4.832;DB;DP=500;Dels=0.00;EFF=EXON(MODIFIER|||||BRD9||CODING|NR_027633.1|11|1),NON_SYNONYMOUS_CODING(MODERATE|MISSENSE|Atg/Ttg|M353L|544|BRD9||CODING|NM_001009877.2|11|1),NON_SYNONYMOUS_CODING(MODERATE|MISSENSE|Atg/Ttg|M406L|597|BRD9||CODING|NM_023924.4|11|1);FS=16.874;HaplotypeScore=3.8368;MLEAC=1;MLEAF=0.500;MQ=48.18;MQ0=48;MQRankSum=-14.747;QD=2.06;ReadPosRankS…	chr5.863849-892939 ; 5p15.33 ; gain
BTBD11	BTB (POZ) domain containing 11	0.222222	AC=1;AF=0.500;AN=2;BaseQRankSum=6.432;DB;DP=500;Dels=0.00;EFF=NON_SYNONYMOUS_CODING(MODERATE|MISSENSE|Ggc/Agc|G448S|1104|BTBD11||CODING|NM_001018072.1|3|1);FS=0.000;HaplotypeScore=19.6606;MLEAC=1;MLEAF=0.500;MQ=59.95;MQ0=0;MQRankSum=-0.242;QD=21.60;ReadPosRankSum=1.388	chr12.107712196-108053419 ; 12q23.3 ; gain
BTBD17	BTB (POZ) domain containing 17	0.111111	AC=1;AF=0.500;AN=2;BaseQRankSum=2.468;DP=500;Dels=0.00;EFF=DOWNSTREAM(MODIFIER||||478|BTBD17||CODING|NM_001080466.1||1),NON_SYNONYMOUS_CODING(MODERATE|MISSENSE|cGg/cAg|R791Q|998|KIF19||CODING|NM_153209.3|18|1);FS=3.347;HaplotypeScore=10.1747;MLEAC=1;MLEAF=0.500;MQ=60.00;MQ0=0;MQRankSum=-0.021;QD=9.25;ReadPosRankSum=-1.074	chr17.72352554-72357958 ; 17q25.1 ; gain
C10orf90	chromosome 10 open reading frame 90	0.0833333	AC=1;AF=0.500;AN=2;BaseQRankSum=15.034;DB;DP=500;Dels=0.00;EFF=NON_SYNONYMOUS_CODING(MODERATE|MISSENSE|cGg/cTg|R590L|699|C10orf90||CODING|NM_001004298.2|6|1);FS=2.067;HaplotypeScore=0.8667;MLEAC=1;MLEAF=0.500;MQ=60.00;MQ0=0;MQRankSum=0.113;QD=13.65;ReadPosRankSum=-1.906	chr10.128113573-128210010 ; 10q26.2 ; gain
C1R	complement component 1, r subcomponent	0.0833333	NA	chr12.7187514-7245043 ; 12p13.31 ; gain
C20orf26	chromosome 20 open reading frame 26	0.0555556	AC=1;AF=0.500;AN=2;BaseQRankSum=5.364;DB;DP=500;Dels=0.00;EFF=INTRON(MODIFIER||||1237|C20orf26||CODING|NM_015585.3|1|1),NON_SYNONYMOUS_CODING(MODERATE|MISSENSE|Cgg/Tgg|R52W|848|CRNKL1||CODING|NM_016652.4|2|1),UPSTREAM(MODIFIER||||470|C20orf26||CODING|NM_001167816.1||1);FS=0.329;HaplotypeScore=8.6134;MLEAC=1;MLEAF=0.500;MQ=60.00;MQ0=0;MQRankSum=0.248;QD=13.19;ReadPosRankSum=-0.066	chr20.20033157-20341346 ; 20p11.23 ; gain
C4orf3	chromosome 4 open reading frame 3	0.527778	AC=1;AF=0.500;AN=2;BaseQRankSum=7.878;DB;DP=500;Dels=0.00;EFF=DOWNSTREAM(MODIFIER||||199|C4orf3||CODING|NM_001170330.1||1),DOWNSTREAM(MODIFIER||||66|C4orf3||CODING|NM_001001701.3||1),NON_SYNONYMOUS_CODING(MODERATE|MISSENSE|agT/agG|S962R|1073|USP53||CODING|NM_019050.2|18|1);FS=5.198;HaplotypeScore=3.7147;MLEAC=1;MLEAF=0.500;MQ=59.96;MQ0=0;MQRankSum=-0.126;QD=12.86;ReadPosRankSum=-0.256	chr4.120217573-120225600 ; 4q26 ; loss
CA13	carbonic anhydrase XIII	0.0833333	AC=1;AF=0.500;AN=2;BaseQRankSum=-9.658;DP=500;Dels=0.00;EFF=NON_SYNONYMOUS_CODING(MODERATE|MISSENSE|ttG/ttC|L145F|262|CA13||CODING|NM_198584.2|4|1);FS=1.175;HaplotypeScore=7.6689;MLEAC=1;MLEAF=0.500;MQ=59.97;MQ0=0;MQRankSum=0.959;QD=5.33;ReadPosRankSum=0.906	chr8.86157715-86196302 ; 8q21.2 ; gain
CACNA2D2	calcium channel, voltage-dependent, alpha 2/delta subunit 2	0.111111	AC=1;AF=0.500;AN=2;BaseQRankSum=10.570;DP=500;Dels=0.00;EFF=NON_SYNONYMOUS_CODING(MODERATE|MISSENSE|Acg/Tcg|T212S|1143|CACNA2D2||CODING|NM_006030.2|6|1),NON_SYNONYMOUS_CODING(MODERATE|MISSENSE|Acg/Tcg|T212S|1145|CACNA2D2||CODING|NM_001005505.1|6|1),NON_SYNONYMOUS_CODING(MODERATE|MISSENSE|Acg/Tcg|T212S|1150|CACNA2D2||CODING|NM_001174051.1|6|1);FS=26.221;HaplotypeScore=2.7286;MLEAC=1;MLEAF=0.500;MQ…	chr3.50400230-50540892 ; 3p21.31 ; gain
CACNB4	calcium channel, voltage-dependent, beta 4 subunit	0.0555556	AC=1;AF=0.500;AN=2;BaseQRankSum=-12.039;DP=500;Dels=0.00;EFF=NON_SYNONYMOUS_CODING(MODERATE|MISSENSE|Gac/Aac|D453N|458|CACNB4||CODING|NM_001145798.1|13|1),NON_SYNONYMOUS_CODING(MODERATE|MISSENSE|Gac/Aac|D481N|486|CACNB4||CODING|NM_001005747.2|13|1),NON_SYNONYMOUS_CODING(MODERATE|MISSENSE|Gac/Aac|D497N|502|CACNB4||CODING|NM_001005746.2|14|1),NON_SYNONYMOUS_CODING(MODERATE|MISSENSE|Gac/Aac|D515N|52…	chr2.152689285-152955593 ; 2q23.3 ; gain
CADM3	cell adhesion molecule 3	0.138889	AC=1;AF=0.500;AN=2;BaseQRankSum=-5.596;DP=500;Dels=0.00;EFF=DOWNSTREAM(MODIFIER||||398|CADM3||CODING|NM_001127173.1||1),DOWNSTREAM(MODIFIER||||432|CADM3||CODING|NM_021189.3||1),NON_SYNONYMOUS_CODING(MODERATE|MISSENSE|Cta/Ata|L306I|336|DARC||CODING|NM_002036.3|2|1),NON_SYNONYMOUS_CODING(MODERATE|MISSENSE|Cta/Ata|L308I|338|DARC||CODING|NM_001122951.2|1|1),UPSTREAM(MODIFIER|||||LOC100131825||NON_COD…	chr1.159141376-159172932 ; 1q23.2 ; gain
CADPS	Ca++-dependent secretion activator	0.166667	AC=2;AF=1.00;AN=2;BaseQRankSum=1.160;DP=417;Dels=0.00;EFF=NON_SYNONYMOUS_CODING(MODERATE|MISSENSE|atG/atT|M238I|1274|CADPS||CODING|NM_183393.2|3|1),NON_SYNONYMOUS_CODING(MODERATE|MISSENSE|atG/atT|M238I|1314|CADPS||CODING|NM_183394.2|3|1),NON_SYNONYMOUS_CODING(MODERATE|MISSENSE|atG/atT|M238I|1353|CADPS||CODING|NM_003716.3|3|1);FS=5.111;HaplotypeScore=2.9795;MLEAC=2;MLEAF=1.00;MQ=60.00;MQ0=0;MQRank…	chr3.62384020-62861064 ; 3p14.2 ; gain
CAGE1	cancer antigen 1	0.138889	AC=1;AF=0.500;AN=2;BaseQRankSum=7.861;DP=500;Dels=0.00;EFF=NON_SYNONYMOUS_CODING(MODERATE|MISSENSE|Tcc/Gcc|S138A|641|CAGE1||CODING|NM_205864.2|4|1),NON_SYNONYMOUS_CODING(MODERATE|MISSENSE|Tcc/Gcc|S274A|824|CAGE1||CODING|NM_001170693.1|5|1),NON_SYNONYMOUS_CODING(MODERATE|MISSENSE|Tcc/Gcc|S274A|839|CAGE1||CODING|NM_001170692.1|5|1);FS=5.178;HaplotypeScore=4.5771;MLEAC=1;MLEAF=0.500;MQ=60.00;MQ0=0;M…	chr6.7326886-7389942 ; 6p24.3 ; gain
CAMK1D	calcium/calmodulin-dependent protein kinase ID	0.0555556	AC=1;AF=0.500;AN=2;BaseQRankSum=7.322;DP=500;Dels=0.00;EFF=DOWNSTREAM(MODIFIER||||357|CAMK1D||CODING|NM_020397.2||1),NON_SYNONYMOUS_CODING(MODERATE|MISSENSE|tCg/tTg|S361L|385|CAMK1D||CODING|NM_153498.2|11|1),UPSTREAM(MODIFIER|||||LOC283070||NON_CODING|NR_027322.1||1);FS=3.009;HaplotypeScore=8.6961;MLEAC=1;MLEAF=0.500;MQ=60.00;MQ0=0;MQRankSum=-0.757;QD=12.58;ReadPosRankSum=1.170	chr10.12391582-12871733 ; 10p13 ; gain
CAMTA1	calmodulin binding transcription activator 1	0.166667	NA	chr1.6845383-7829766 ; 1p36.31 ; gain
CAPRIN1	cell cycle associated protein 1	0.0555556	AC=1;AF=0.500;AN=2;BaseQRankSum=9.013;DB;DP=500;Dels=0.00;EFF=NON_SYNONYMOUS_CODING(MODERATE|MISSENSE|gCg/gTg|A429V|694|CAPRIN1||CODING|NM_203364.2|12|1),NON_SYNONYMOUS_CODING(MODERATE|MISSENSE|gCg/gTg|A429V|709|CAPRIN1||CODING|NM_005898.4|12|1);FS=5.821;HaplotypeScore=6.2193;MLEAC=1;MLEAF=0.500;MQ=59.97;MQ0=0;MQRankSum=-0.317;QD=11.09;ReadPosRankSum=1.540	chr11.34073229-34124157 ; 11p13 ; gain
CAPRIN2	caprin family member 2	0.0555556	AC=1;AF=0.500;AN=2;BaseQRankSum=8.229;DP=500;Dels=0.00;EFF=EXON(MODIFIER|||||CAPRIN2||CODING|NR_038177.1|14|1),INTRON(MODIFIER||||905|CAPRIN2||CODING|NM_001206856.1|13|1),NON_SYNONYMOUS_CODING(MODERATE|MISSENSE|Agc/Ggc|S787G|1077|CAPRIN2||CODING|NM_023925.3|14|1),NON_SYNONYMOUS_CODING(MODERATE|MISSENSE|Agc/Ggc|S836G|960|CAPRIN2||CODING|NM_032156.3|15|1),NON_SYNONYMOUS_CODING(MODERATE|MISSENSE|Agc…	chr12.30862485-30907448 ; 12p11.21 ; gain
CARD11	caspase recruitment domain family, member 11	0.0833333	AC=1;AF=0.500;AN=2;BaseQRankSum=-9.288;DP=500;Dels=0.00;EFF=NON_SYNONYMOUS_CODING(MODERATE|MISSENSE|Gag/Aag|E374K|1154|CARD11||CODING|NM_032415.4|8|1);FS=1.058;HaplotypeScore=2.9885;MLEAC=1;MLEAF=0.500;MQ=60.00;MQ0=0;MQRankSum=-0.177;QD=13.07;ReadPosRankSum=0.875	chr7.2945709-3083509 ; 7p22.2 ; gain
CBLB	Cas-Br-M (murine) ecotropic retroviral transforming sequence b	0.0833333	AC=1;AF=0.500;AN=2;BaseQRankSum=1.507;DP=500;Dels=0.00;EFF=NON_SYNONYMOUS_CODING(MODERATE|MISSENSE|cCc/cTc|P425L|982|CBLB||CODING|NM_170662.3|10|1);FS=0.755;HaplotypeScore=10.1508;MLEAC=1;MLEAF=0.500;MQ=59.99;MQ0=0;MQRankSum=0.019;QD=13.48;ReadPosRankSum=-1.552	chr3.105377108-105587887 ; 3q13.11 ; gain
CCDC101	coiled-coil domain containing 101	0.0833333	AC=1;AF=0.500;AN=2;BaseQRankSum=-2.774;DP=500;Dels=0.00;EFF=DOWNSTREAM(MODIFIER||||293|CCDC101||CODING|NM_138414.2||1),NON_SYNONYMOUS_CODING(MODERATE|MISSENSE|Ggg/Agg|G88R|295|SULT1A2||CODING|NM_001054.3|3|1),NON_SYNONYMOUS_CODING(MODERATE|MISSENSE|Ggg/Agg|G88R|295|SULT1A2||CODING|NM_177528.2|3|1);FS=5.002;HaplotypeScore=5.7533;MLEAC=1;MLEAF=0.500;MQ=59.24;MQ0=1;MQRankSum=2.051;QD=14.09;ReadPosRa…	chr16.28565248-28603111 ; 16p11.2 ; gain
CCDC14	coiled-coil domain containing 14	0.0555556	AC=1;AF=0.500;AN=2;BaseQRankSum=-2.348;DP=500;Dels=0.00;EFF=NON_SYNONYMOUS_CODING(MODERATE|MISSENSE|tGg/tTg|W41L|912|CCDC14||CODING|NM_022757.4|1|1);FS=0.000;HaplotypeScore=10.7748;MLEAC=1;MLEAF=0.500;MQ=60.00;MQ0=0;MQRankSum=-0.513;QD=13.21;ReadPosRankSum=-0.517	chr3.123632273-123680255 ; 3q21.1 ; gain
CCDC150	coiled-coil domain containing 150	0.166667	AC=1;AF=0.500;AN=2;BaseQRankSum=-0.380;DB;DP=500;Dels=0.00;EFF=NON_SYNONYMOUS_CODING(MODERATE|MISSENSE|Gaa/Aaa|E156K|1101|CCDC150||CODING|NM_001080539.1|4|1);FS=11.764;HaplotypeScore=2.9126;MLEAC=1;MLEAF=0.500;MQ=60.00;MQ0=0;MQRankSum=-0.426;QD=13.59;ReadPosRankSum=0.014	chr2.197504355-197597530 ; 2q33.1 ; gain
CCDC158	coiled-coil domain containing 158	0.0833333	AC=1;AF=0.500;AN=2;BaseQRankSum=-11.074;DP=500;Dels=0.00;EFF=NON_SYNONYMOUS_CODING(MODERATE|MISSENSE|gCa/gTa|A999V|1113|CCDC158||CODING|NM_001042784.1|21|1);FS=1.889;HaplotypeScore=5.2651;MLEAC=1;MLEAF=0.500;MQ=60.00;MQ0=0;MQRankSum=-0.637;QD=24.30;ReadPosRankSum=0.938	chr4.77234191-77328458 ; 4q21.1 ; gain
CCDC42	coiled-coil domain containing 42	0.0555556	AC=2;AF=1.00;AN=2;BaseQRankSum=1.725;DP=500;Dels=0.00;EFF=NON_SYNONYMOUS_CODING(MODERATE|MISSENSE|gCg/gTg|A134V|242|CCDC42||CODING|NM_001158261.1|4|1),NON_SYNONYMOUS_CODING(MODERATE|MISSENSE|gCg/gTg|A134V|316|CCDC42||CODING|NM_144681.2|4|1);FS=1.959;HaplotypeScore=7.9533;MLEAC=2;MLEAF=1.00;MQ=60.00;MQ0=0;MQRankSum=1.219;QD=33.45;ReadPosRankSum=0.459	chr17.8633245-8648154 ; 17p13.1 ; gain
CCDC60	coiled-coil domain containing 60	0.555556	AC=2;AF=1.00;AN=2;BaseQRankSum=0.892;DB;DP=500;Dels=0.00;EFF=NON_SYNONYMOUS_CODING(MODERATE|MISSENSE|Ata/Gta|I46V|550|CCDC60||CODING|NM_178499.3|2|1);FS=0.000;HaplotypeScore=9.0159;MLEAC=2;MLEAF=1.00;MQ=60.00;MQ0=0;MQRankSum=-0.969;QD=31.89;ReadPosRankSum=-1.515	chr12.119772516-119978852 ; 12q24.23 ; gain
CDC73	cell division cycle 73, Paf1/RNA polymerase II complex component, homolog (S. cerevisiae)	0.0555556	AC=1;AF=0.500;AN=2;BaseQRankSum=9.726;DP=500;Dels=0.00;EFF=INTRON(MODIFIER||||531|CDC73||CODING|NM_024529.4|10|1),NON_SYNONYMOUS_CODING(MODERATE|MISSENSE|Cgc/Agc|R335S|422|B3GALT2||CODING|NM_003783.3|2|1);FS=1.999;HaplotypeScore=11.8648;MLEAC=1;MLEAF=0.500;MQ=59.98;MQ0=0;MQRankSum=-0.295;QD=2.26;ReadPosRankSum=1.622	chr1.193091087-193223942 ; 1q31.2 ; loss
CDH11	cadherin 11, type 2, OB-cadherin (osteoblast)	0.0833333	NA	chr16.64980682-65155919 ; 16q21 ; gain
CDKL1	cyclin-dependent kinase-like 1 (CDC2-related kinase)	0.722222	AC=1;AF=0.500;AN=2;BaseQRankSum=3.149;DB;DP=500;Dels=0.00;EFF=NON_SYNONYMOUS_CODING(MODERATE|MISSENSE|Caa/Gaa|Q275E|358|CDKL1||CODING|NM_004196.3|8|1);FS=1.194;HaplotypeScore=3.4663;MLEAC=1;MLEAF=0.500;MQ=60.00;MQ0=0;MQRankSum=0.080;QD=14.66;ReadPosRankSum=0.511	chr14.50796719-50862617 ; 14q21.3 ; gain
CDKL2	cyclin-dependent kinase-like 2 (CDC2-related kinase)	0.0555556	AC=1;AF=0.500;AN=2;BaseQRankSum=-13.524;DP=500;Dels=0.00;EFF=NON_SYNONYMOUS_CODING(MODERATE|MISSENSE|caG/caT|Q210H|493|CDKL2||CODING|NM_003948.3|5|1);FS=3.780;HaplotypeScore=6.5402;MLEAC=1;MLEAF=0.500;MQ=60.00;MQ0=0;MQRankSum=-0.506;QD=13.87;ReadPosRankSum=0.061	chr4.76501703-76555721 ; 4q21.1 ; gain
CDKN2C	cyclin-dependent kinase inhibitor 2C (p18, inhibits CDK4)	0.0555556	NA	chr1.51434366-51440309 ; 1p32.3 ; loss
CDO1	cysteine dioxygenase, type I	0.0555556	NA	chr5.115140429-115152405 ; 5q22.3 ; gain
CEACAM6	carcinoembryonic antigen-related cell adhesion molecule 6 (non-specific cross reacting antigen)	0.111111	AC=1;AF=0.500;AN=2;BaseQRankSum=-5.991;DP=500;Dels=0.00;EFF=NON_SYNONYMOUS_CODING(MODERATE|MISSENSE|Gga/Aga|G336R|344|CEACAM6||CODING|NM_002483.4|5|1);FS=14.884;HaplotypeScore=6.9933;MLEAC=1;MLEAF=0.500;MQ=60.00;MQ0=0;MQRankSum=-1.117;QD=13.63;ReadPosRankSum=0.064	chr19.42259397-42276113 ; 19q13.2 ; gain
CELF2	CUG triplet repeat, RNA binding protein 2	0.0555556	AC=1;AF=0.500;AN=2;BaseQRankSum=-14.331;DP=500;Dels=0.00;EFF=NON_SYNONYMOUS_CODING(MODERATE|MISSENSE|Ctg/Atg|L317M|488|CELF2||CODING|NM_001083591.1|10|1),NON_SYNONYMOUS_CODING(MODERATE|MISSENSE|Ctg/Atg|L317M|490|CELF2||CODING|NM_001025076.2|10|1),NON_SYNONYMOUS_CODING(MODERATE|MISSENSE|Ctg/Atg|L341M|508|CELF2||CODING|NM_001025077.2|10|1),NON_SYNONYMOUS_CODING(MODERATE|MISSENSE|Ctg/Atg|L348M|521|C…	chr10.11047258-11378672 ; 10p14 ; gain
CENPC1	centromere protein C 1	0.0833333	AC=1;AF=0.500;AN=2;BaseQRankSum=-13.940;DP=499;Dels=0.00;EFF=NON_SYNONYMOUS_CODING(MODERATE|MISSENSE|Ctt/Ttt|L162F|943|CENPC1||CODING|NM_001812.2|6|1);FS=8.028;HaplotypeScore=5.5242;MLEAC=1;MLEAF=0.500;MQ=54.67;MQ0=0;MQRankSum=0.536;QD=12.20;ReadPosRankSum=0.570	chr4.68337988-68411256 ; 4q13.2 ; gain
CEP290	centrosomal protein 290kDa	0.111111	AC=2;AF=1.00;AN=2;BaseQRankSum=-1.436;DP=500;Dels=0.00;EFF=NON_SYNONYMOUS_CODING(MODERATE|MISSENSE|caG/caT|Q328H|2479|CEP290||CODING|NM_025114.3|12|1);FS=0.000;HaplotypeScore=5.3843;MLEAC=2;MLEAF=1.00;MQ=59.99;MQ0=0;MQRankSum=0.836;QD=32.42;ReadPosRankSum=1.680	chr12.88442789-88535993 ; 12q21.32 ; gain
CHD2	chromodomain helicase DNA binding protein 2	0.111111	AC=1;AF=0.500;AN=2;BaseQRankSum=-11.257;DP=500;Dels=0.00;EFF=NON_SYNONYMOUS_CODING(MODERATE|MISSENSE|gaA/gaC|E1377D|1828|CHD2||CODING|NM_001271.3|32|1);FS=0.000;HaplotypeScore=6.9178;MLEAC=1;MLEAF=0.500;MQ=60.00;MQ0=0;MQRankSum=0.698;QD=11.72;ReadPosRankSum=0.679	chr15.93443550-93571237 ; 15q26.1 ; gain
CHI3L2	chitinase 3-like 2	0.388889	AC=1;AF=0.500;AN=2;BaseQRankSum=3.649;DB;DP=495;Dels=0.00;EFF=NON_SYNONYMOUS_CODING(MODERATE|MISSENSE|gCg/gTg|A103V|311|CHI3L2||CODING|NM_001025199.1|5|1),NON_SYNONYMOUS_CODING(MODERATE|MISSENSE|gCg/gTg|A172V|380|CHI3L2||CODING|NM_001025197.1|5|1),NON_SYNONYMOUS_CODING(MODERATE|MISSENSE|gCg/gTg|A182V|390|CHI3L2||CODING|NM_004000.2|6|1);FS=5.541;HaplotypeScore=3.7775;MLEAC=1;MLEAF=0.500;MQ=60.00;M…	chr1.111770280-111786062 ; 1p13.3 ; loss
CHUK	conserved helix-loop-helix ubiquitous kinase	0.0555556	AC=1;AF=0.500;AN=2;BaseQRankSum=-2.574;DP=500;Dels=0.00;EFF=NON_SYNONYMOUS_CODING(MODERATE|MISSENSE|tTg/tCg|L491S|745|CHUK||CODING|NM_001278.3|13|1);FS=13.360;HaplotypeScore=4.9923;MLEAC=1;MLEAF=0.500;MQ=59.97;MQ0=0;MQRankSum=0.409;QD=12.07;ReadPosRankSum=-1.390	chr10.101948123-101989344 ; 10q24.31 ; gain
CIRH1A	cirrhosis, autosomal recessive 1A (cirhin)	0.0833333	AC=1;AF=0.500;AN=2;BaseQRankSum=-2.805;DP=500;Dels=0.00;EFF=NON_SYNONYMOUS_CODING(MODERATE|MISSENSE|cGc/cTc|R291L|686|CIRH1A||CODING|NM_032830.2|7|1);FS=0.886;HaplotypeScore=0.8321;MLEAC=1;MLEAF=0.500;MQ=60.00;MQ0=0;MQRankSum=-0.810;QD=22.92;ReadPosRankSum=-0.383	chr16.69166498-69202937 ; 16q22.1 ; gain
CISH	cytokine inducible SH2-containing protein	0.111111	AC=1;AF=0.500;AN=2;BaseQRankSum=-13.048;DP=500;Dels=0.00;EFF=INTRON(MODIFIER||||258|CISH||CODING|NM_145071.2|1|1),NON_SYNONYMOUS_CODING(MODERATE|MISSENSE|Gcc/Acc|A17T|275|CISH||CODING|NM_013324.5|2|1),UPSTREAM(MODIFIER||||382|MAPKAPK3||CODING|NM_001243926.1||1);FS=5.609;HaplotypeScore=15.1232;MLEAC=1;MLEAF=0.500;MQ=60.00;MQ0=0;MQRankSum=0.957;QD=12.70;ReadPosRankSum=-0.140	chr3.50643884-50649262 ; 3p21.2 ; gain
CIT	citron (rho-interacting, serine/threonine kinase 21)	0.111111	AC=1;AF=0.500;AN=2;BaseQRankSum=2.151;DP=500;Dels=0.00;EFF=NON_SYNONYMOUS_CODING(MODERATE|MISSENSE|Cgg/Tgg|R1183W|2027|CIT||CODING|NM_007174.2|28|1),NON_SYNONYMOUS_CODING(MODERATE|MISSENSE|Cgg/Tgg|R1225W|2069|CIT||CODING|NM_001206999.1|29|1);FS=1.596;HaplotypeScore=2.7569;MLEAC=1;MLEAF=0.500;MQ=60.00;MQ0=0;MQRankSum=0.377;QD=6.17;ReadPosRankSum=2.282	chr12.120123594-120315095 ; 12q24.23 ; gain
CIZ1	CDKN1A interacting zinc finger protein 1	0.25	AC=1;AF=0.500;AN=2;BaseQRankSum=5.584;DB;DP=500;Dels=0.00;EFF=NON_SYNONYMOUS_CODING(MODERATE|MISSENSE|Gtg/Atg|V537M|797|CIZ1||CODING|NM_001257976.1|10|1),NON_SYNONYMOUS_CODING(MODERATE|MISSENSE|Gtg/Atg|V558M|818|CIZ1||CODING|NM_001131018.1|11|1),NON_SYNONYMOUS_CODING(MODERATE|MISSENSE|Gtg/Atg|V577M|837|CIZ1||CODING|NM_001131017.1|12|1),NON_SYNONYMOUS_CODING(MODERATE|MISSENSE|Gtg/Atg|V582M|842|CIZ…	chr9.130928343-130966662 ; 9q34.11 ; loss
CKAP2L	cytoskeleton associated protein 2-like	0.0833333	AC=1;AF=0.500;AN=2;BaseQRankSum=-4.432;DP=500;Dels=0.00;EFF=NON_SYNONYMOUS_CODING(MODERATE|MISSENSE|Gag/Cag|E625Q|745|CKAP2L||CODING|NM_152515.3|8|1);FS=4.911;HaplotypeScore=8.5190;MLEAC=1;MLEAF=0.500;MQ=60.00;MQ0=0;MQRankSum=-0.619;QD=15.01;ReadPosRankSum=1.308	chr2.113495443-113522254 ; 2q13 ; gain
CLEC14A	C-type lectin domain family 14, member A	0.222222	AC=1;AF=0.500;AN=2;BaseQRankSum=-10.042;DP=500;Dels=0.00;EFF=NON_SYNONYMOUS_CODING(MODERATE|MISSENSE|Agg/Ggg|R304G|490|CLEC14A||CODING|NM_175060.2|1|1);FS=13.256;HaplotypeScore=15.9873;MLEAC=1;MLEAF=0.500;MQ=60.00;MQ0=0;MQRankSum=-0.162;QD=12.67;ReadPosRankSum=-1.513	chr14.38723204-38725575 ; 14q21.1 ; gain
CLIP1	CAP-GLY domain containing linker protein 1	0.222222	AC=1;AF=0.500;AN=2;BaseQRankSum=1.228;DP=500;Dels=0.00;EFF=NON_SYNONYMOUS_CODING(MODERATE|MISSENSE|cAg/cTg|Q478L|1392|CLIP1||CODING|NM_198240.1|9|1),NON_SYNONYMOUS_CODING(MODERATE|MISSENSE|cAg/cTg|Q513L|1427|CLIP1||CODING|NM_002956.2|10|1),NON_SYNONYMOUS_CODING(MODERATE|MISSENSE|cAg/cTg|Q524L|1438|CLIP1||CODING|NM_001247997.1|11|1);FS=0.360;HaplotypeScore=3.7846;MLEAC=1;MLEAF=0.500;MQ=59.92;MQ0=0…	chr12.122755980-122907116 ; 12q24.31 ; gain
CLIP2	CAP-GLY domain containing linker protein 2	0.0555556	AC=1;AF=0.500;AN=2;BaseQRankSum=-12.205;DP=486;Dels=0.00;EFF=NON_SYNONYMOUS_CODING(MODERATE|MISSENSE|gGc/gTc|G153V|1011|CLIP2||CODING|NM_032421.2|3|1),NON_SYNONYMOUS_CODING(MODERATE|MISSENSE|gGc/gTc|G153V|1046|CLIP2||CODING|NM_003388.4|3|1);FS=4.539;HaplotypeScore=11.6333;MLEAC=1;MLEAF=0.500;MQ=60.00;MQ0=0;MQRankSum=-0.495;QD=11.81;ReadPosRankSum=-1.508	chr7.73703804-73820273 ; 7q11.23 ; gain
CLRN3	clarin 3	0.0833333	AC=1;AF=0.500;AN=2;BaseQRankSum=-7.386;DP=500;Dels=0.00;EFF=NON_SYNONYMOUS_CODING(MODERATE|MISSENSE|Gcc/Acc|A204T|226|CLRN3||CODING|NM_152311.3|3|1);FS=6.253;HaplotypeScore=4.8211;MLEAC=1;MLEAF=0.500;MQ=60.00;MQ0=0;MQRankSum=-0.492;QD=13.59;ReadPosRankSum=-0.002	chr10.129676113-129691211 ; 10q26.2 ; gain
CLSTN2	calsyntenin 2	0.0555556	AC=1;AF=0.500;AN=2;BaseQRankSum=-12.529;DP=500;Dels=0.00;EFF=NON_SYNONYMOUS_CODING(MODERATE|MISSENSE|tCc/tAc|S274Y|955|CLSTN2||CODING|NM_022131.2|6|1);FS=6.691;HaplotypeScore=8.8303;MLEAC=1;MLEAF=0.500;MQ=59.89;MQ0=1;MQRankSum=-0.295;QD=5.11;ReadPosRankSum=1.351	chr3.139654026-140286919 ; 3q23 ; gain
CNBD1	cyclic nucleotide binding domain containing 1	0.0833333	AC=1;AF=0.500;AN=2;BaseQRankSum=2.476;DP=500;Dels=0.00;EFF=NON_SYNONYMOUS_CODING(MODERATE|MISSENSE|gAc/gTc|D286V|436|CNBD1||CODING|NM_173538.2|7|1);FS=0.444;HaplotypeScore=2.7470;MLEAC=1;MLEAF=0.500;MQ=60.00;MQ0=0;MQRankSum=0.056;QD=6.01;ReadPosRankSum=-1.487	chr8.87878675-88394955 ; 8q21.3 ; gain
CNGA1	cyclic nucleotide gated channel alpha 1	0.0833333	AC=1;AF=0.500;AN=2;BaseQRankSum=6.507;DP=500;Dels=0.00;EFF=NON_SYNONYMOUS_CODING(MODERATE|MISSENSE|cGa/cAa|R514Q|690|CNGA1||CODING|NM_000087.3|11|1),NON_SYNONYMOUS_CODING(MODERATE|MISSENSE|cGa/cAa|R583Q|759|CNGA1||CODING|NM_001142564.1|10|1);FS=13.654;HaplotypeScore=3.9967;MLEAC=1;MLEAF=0.500;MQ=60.00;MQ0=0;MQRankSum=-0.418;QD=13.58;ReadPosRankSum=-0.785	chr4.47937993-48014961 ; 4p12 ; gain
CNGB1	cyclic nucleotide gated channel beta 1	0.0555556	AC=1;AF=0.500;AN=2;BaseQRankSum=-7.552;DP=500;Dels=0.00;EFF=NON_SYNONYMOUS_CODING(MODERATE|MISSENSE|cAa/cGa|Q150R|1251|CNGB1||CODING|NM_001297.4|7|1),NON_SYNONYMOUS_CODING(MODERATE|MISSENSE|cAa/cGa|Q150R|299|CNGB1||CODING|NM_001135639.1|7|1);FS=7.067;HaplotypeScore=9.3237;MLEAC=1;MLEAF=0.500;MQ=60.00;MQ0=0;MQRankSum=0.201;QD=6.32;ReadPosRankSum=-0.063	chr16.57916243-58005020 ; 16q21 ; gain
CNGB3	cyclic nucleotide gated channel beta 3	0.111111	AC=1;AF=0.500;AN=2;BaseQRankSum=-6.555;DP=500;Dels=0.00;EFF=NON_SYNONYMOUS_CODING(MODERATE|MISSENSE|gaG/gaT|E289D|809|CNGB3||CODING|NM_019098.4|7|1);FS=44.694;HaplotypeScore=2.9241;MLEAC=1;MLEAF=0.500;MQ=60.00;MQ0=0;MQRankSum=-0.160;QD=5.32;ReadPosRankSum=-0.971	chr8.87586162-87755903 ; 8q21.3 ; gain
CNNM2	cyclin M2	0.0833333	AC=2;AF=1.00;AN=2;BaseQRankSum=-1.590;DP=233;Dels=0.00;EFF=NON_SYNONYMOUS_CODING(MODERATE|MISSENSE|tGc/tTc|C293F|552|CNNM2||CODING|NM_199077.2|1|1),NON_SYNONYMOUS_CODING(MODERATE|MISSENSE|tGc/tTc|C293F|853|CNNM2||CODING|NM_199076.2|1|1),NON_SYNONYMOUS_CODING(MODERATE|MISSENSE|tGc/tTc|C293F|875|CNNM2||CODING|NM_017649.4|1|1);FS=3.345;HaplotypeScore=3.1985;MLEAC=2;MLEAF=1.00;MQ=59.92;MQ0=0;MQRankSu…	chr10.104678074-104838344 ; 10q24.32 ; gain
CNTN1	contactin 1	0.111111	AC=1;AF=0.500;AN=2;BaseQRankSum=8.873;DB;DP=500;Dels=0.00;EFF=NON_SYNONYMOUS_CODING(MODERATE|MISSENSE|Cgc/Tgc|R966C|1007|CNTN1||CODING|NM_175038.2|21|1),NON_SYNONYMOUS_CODING(MODERATE|MISSENSE|Cgc/Tgc|R977C|1018|CNTN1||CODING|NM_001843.3|23|1);FS=3.507;HaplotypeScore=6.5309;MLEAC=1;MLEAF=0.500;MQ=59.88;MQ0=1;MQRankSum=-0.596;QD=10.99;ReadPosRankSum=3.052	chr12.41086243-41466213 ; 12q12 ; gain
CNTN5	contactin 5	0.0833333	AC=1;AF=0.500;AN=2;BaseQRankSum=0.825;DB;DP=500;Dels=0.00;EFF=NON_SYNONYMOUS_CODING(MODERATE|MISSENSE|Gaa/Aaa|E610K|1026|CNTN5||CODING|NM_175566.2|14|1),NON_SYNONYMOUS_CODING(MODERATE|MISSENSE|Gaa/Aaa|E684K|1100|CNTN5||CODING|NM_001243270.1|16|1),NON_SYNONYMOUS_CODING(MODERATE|MISSENSE|Gaa/Aaa|E684K|1100|CNTN5||CODING|NM_014361.3|17|1),NON_SYNONYMOUS_CODING(MODERATE|MISSENSE|Gaa/Aaa|E684K|911|CNT…	chr11.98891705-100229616 ; 11q22.1 ; gain
CNTNAP4	contactin associated protein-like 4	0.166667	AC=1;AF=0.500;AN=2;BaseQRankSum=-8.764;DP=500;Dels=0.00;EFF=NON_SYNONYMOUS_CODING(MODERATE|MISSENSE|Ccc/Tcc|P191S|1307|CNTNAP4||CODING|NM_033401.3|5|1),NON_SYNONYMOUS_CODING(MODERATE|MISSENSE|tCc/tTc|S166F|1235|CNTNAP4||CODING|NM_138994.3|5|1);FS=1.504;HaplotypeScore=3.9034;MLEAC=1;MLEAF=0.500;MQ=60.00;MQ0=0;MQRankSum=-0.198;QD=12.03;ReadPosRankSum=1.064 , AC=1;AF=0.500;AN=2;BaseQRankSum=9.222;DP…	chr16.76311175-76593135 ; 16q23.1 ; gain
CNTNAP5	contactin associated protein-like 5	0.138889	AC=1;AF=0.500;AN=2;BaseQRankSum=6.180;DP=500;Dels=0.00;EFF=NON_SYNONYMOUS_CODING(MODERATE|MISSENSE|Ggc/Agc|G964S|1306|CNTNAP5||CODING|NM_130773.2|18|1);FS=2.266;HaplotypeScore=3.7965;MLEAC=1;MLEAF=0.500;MQ=60.00;MQ0=0;MQRankSum=-0.659;QD=4.15;ReadPosRankSum=-1.575	chr2.124782863-125672863 ; 2q14.3 ; gain
COL19A1	collagen, type XIX, alpha 1	0.0833333	AC=1;AF=0.500;AN=2;BaseQRankSum=-3.368;DP=500;Dels=0.00;EFF=NON_SYNONYMOUS_CODING(MODERATE|MISSENSE|aCa/aAa|T209K|1142|COL19A1||CODING|NM_001858.4|6|1);FS=19.848;HaplotypeScore=5.9775;MLEAC=1;MLEAF=0.500;MQ=60.00;MQ0=0;MQRankSum=-0.640;QD=11.67;ReadPosRankSum=0.556	chr6.70576447-70922157 ; 6q13 ; gain
COL20A1	collagen, type XX, alpha 1	0.0833333	AC=1;AF=0.500;AN=2;BaseQRankSum=-4.303;DP=500;Dels=0.00;EFF=NON_SYNONYMOUS_CODING(MODERATE|MISSENSE|gaG/gaC|E1225D|1284|COL20A1||CODING|NM_020882.2|34|1);FS=3.051;HaplotypeScore=11.1154;MLEAC=1;MLEAF=0.500;MQ=60.00;MQ0=0;MQRankSum=1.041;QD=11.83;ReadPosRankSum=0.567	chr20.61924537-61962285 ; 20q13.33 ; gain
COL24A1	collagen, type XXIV, alpha 1	0.194444	AC=1;AF=0.500;AN=2;BaseQRankSum=4.636;DB;DP=500;Dels=0.00;EFF=NON_SYNONYMOUS_CODING(MODERATE|MISSENSE|aTc/aCc|I293T|1714|COL24A1||CODING|NM_152890.5|3|1);FS=6.866;HaplotypeScore=5.4992;MLEAC=1;MLEAF=0.500;MQ=60.00;MQ0=0;MQRankSum=-1.122;QD=21.26;ReadPosRankSum=0.456	chr1.86194915-86622121 ; 1p22.3 ; gain
COL28A1	collagen, type XXVIII, alpha 1	0.444444	AC=2;AF=1.00;AN=2;BaseQRankSum=2.345;DB;DP=500;Dels=0.00;EFF=NON_SYNONYMOUS_CODING(MODERATE|MISSENSE|gaG/gaC|E433D|1125|COL28A1||CODING|NM_001037763.2|15|1);FS=0.000;HaplotypeScore=5.6919;MLEAC=2;MLEAF=1.00;MQ=59.98;MQ0=0;MQRankSum=1.601;QD=23.52;ReadPosRankSum=1.809	chr7.7398243-7575460 ; 7p21.3 ; gain
COL4A2	collagen, type IV, alpha 2	0.194444	AC=2;AF=1.00;AN=2;BaseQRankSum=1.679;DB;DP=270;Dels=0.00;EFF=INTRON(MODIFIER|||||COL4A2-AS1||NON_CODING|NR_046583.1|2|1),NON_SYNONYMOUS_CODING(MODERATE|MISSENSE|Gtc/Atc|V1399I|1712|COL4A2||CODING|NM_001846.2|44|1);FS=0.000;HaplotypeScore=2.6707;MLEAC=2;MLEAF=1.00;MQ=60.00;MQ0=0;MQRankSum=-1.122;QD=29.81;ReadPosRankSum=-1.613	chr13.110959630-111165373 ; 13q34 ; gain
COL5A2	collagen, type V, alpha 2	0.0833333	AC=1;AF=0.500;AN=2;BaseQRankSum=-4.723;DP=500;Dels=0.00;EFF=NON_SYNONYMOUS_CODING(MODERATE|MISSENSE|atG/atC|M614I|1499|COL5A2||CODING|NM_000393.3|27|1);FS=3.973;HaplotypeScore=11.8773;MLEAC=1;MLEAF=0.500;MQ=60.00;MQ0=0;MQRankSum=0.364;QD=12.18;ReadPosRankSum=2.550	chr2.189896640-190044605 ; 2q32.2 ; gain
COL8A1	collagen, type VIII, alpha 1	0.138889	AC=1;AF=0.500;AN=2;BaseQRankSum=-8.211;DP=500;Dels=0.00;EFF=INTRON(MODIFIER|||||MIR548G||NON_CODING|NR_031662.1|3|1),NON_SYNONYMOUS_CODING(MODERATE|MISSENSE|cCa/cAa|P269Q|744|COL8A1||CODING|NM_001850.4|5|1),NON_SYNONYMOUS_CODING(MODERATE|MISSENSE|cCa/cAa|P269Q|744|COL8A1||CODING|NM_020351.3|4|1);FS=0.000;HaplotypeScore=5.4681;MLEAC=1;MLEAF=0.500;MQ=60.00;MQ0=0;MQRankSum=-0.846;QD=8.34;ReadPosRank…	chr3.99357439-99515577 ; 3q12.1 ; gain
COL9A1	collagen, type IX, alpha 1	0.0833333	AC=1;AF=0.500;AN=2;BaseQRankSum=-15.413;DP=500;Dels=0.00;EFF=NON_SYNONYMOUS_CODING(MODERATE|MISSENSE|gGa/gTa|G604V|678|COL9A1||CODING|NM_078485.3|31|1),NON_SYNONYMOUS_CODING(MODERATE|MISSENSE|gGa/gTa|G847V|921|COL9A1||CODING|NM_001851.4|37|1);FS=11.082;HaplotypeScore=11.6242;MLEAC=1;MLEAF=0.500;MQ=59.92;MQ0=0;MQRankSum=0.307;QD=11.79;ReadPosRankSum=-0.870	chr6.70925742-71012786 ; 6q13 ; gain
CORIN	corin, serine peptidase	0.0833333	AC=1;AF=0.500;AN=2;BaseQRankSum=-8.070;DP=500;Dels=0.00;EFF=NON_SYNONYMOUS_CODING(MODERATE|MISSENSE|gGt/gTt|G401V|1042|CORIN||CODING|NM_006587.2|9|1);FS=2.239;HaplotypeScore=4.7087;MLEAC=1;MLEAF=0.500;MQ=60.00;MQ0=0;MQRankSum=0.610;QD=22.65;ReadPosRankSum=0.032	chr4.47596017-47840059 ; 4p12 ; gain
CPAMD8	C3 and PZP-like, alpha-2-macroglobulin domain containing 8	0.0555556	AC=1;AF=0.500;AN=2;BaseQRankSum=-6.364;DP=500;Dels=0.00;EFF=NON_SYNONYMOUS_CODING(MODERATE|MISSENSE|Cct/Tct|P1160S|1932|CPAMD8||CODING|NM_015692.2|25|1);FS=29.770;HaplotypeScore=0.0000;MLEAC=1;MLEAF=0.500;MQ=60.00;MQ0=0;MQRankSum=-0.453;QD=12.94;ReadPosRankSum=4.133 , AC=1;AF=0.500;AN=2;BaseQRankSum=3.515;DP=500;Dels=0.00;EFF=NON_SYNONYMOUS_CODING(MODERATE|MISSENSE|Gag/Aag|E1148K|1932|CPAMD8||COD…	chr19.17003761-17137625 ; 19p13.11 ; loss
CPS1	carbamoyl-phosphate synthetase 1, mitochondrial	0.166667	AC=2;AF=1.00;AN=2;BaseQRankSum=-1.195;DP=500;Dels=0.00;EFF=NON_SYNONYMOUS_CODING(MODERATE|MISSENSE|atG/atT|M508I|1500|CPS1||CODING|NM_001875.4|14|1),NON_SYNONYMOUS_CODING(MODERATE|MISSENSE|atG/atT|M514I|1506|CPS1||CODING|NM_001122633.2|15|1),NON_SYNONYMOUS_CODING(MODERATE|MISSENSE|atG/atT|M57I|1049|CPS1||CODING|NM_001122634.2|4|1);FS=4.902;HaplotypeScore=9.2612;MLEAC=2;MLEAF=1.00;MQ=59.99;MQ0=0;M…	chr2.211342405-211543831 ; 2q34 ; gain
CPXM2	carboxypeptidase X (M14 family), member 2	0.111111	AC=1;AF=0.500;AN=2;BaseQRankSum=-9.661;DP=500;Dels=0.00;EFF=NON_SYNONYMOUS_CODING(MODERATE|MISSENSE|Gag/Aag|E573K|756|CPXM2||CODING|NM_198148.2|11|1);FS=2.479;HaplotypeScore=8.4032;MLEAC=1;MLEAF=0.500;MQ=59.94;MQ0=0;MQRankSum=0.024;QD=13.63;ReadPosRankSum=0.804	chr10.125505151-125651500 ; 10q26.13 ; gain
CREBBP	CREB binding protein	0.0833333	AC=2;AF=1.00;AN=2;BaseQRankSum=-0.985;DP=500;Dels=0.00;EFF=NON_SYNONYMOUS_CODING(MODERATE|MISSENSE|cTc/cGc|L2292R|2404|CREBBP||CODING|NM_001079846.1|30|1),NON_SYNONYMOUS_CODING(MODERATE|MISSENSE|cTc/cGc|L2330R|2442|CREBBP||CODING|NM_004380.2|31|1);FS=2.952;HaplotypeScore=6.2687;MLEAC=2;MLEAF=1.00;MQ=60.00;MQ0=0;MQRankSum=-1.353;QD=31.74;ReadPosRankSum=2.375	chr16.3775055-3930121 ; 16p13.3 ; gain
CRELD2	cysteine-rich with EGF-like domains 2	0.194444	AC=1;AF=0.500;AN=2;BaseQRankSum=-5.057;DB;DP=500;Dels=0.00;EFF=NON_SYNONYMOUS_CODING(MODERATE|MISSENSE|Tca/Gca|S295A|353|CRELD2||CODING|NM_024324.3|9|1),NON_SYNONYMOUS_CODING(MODERATE|MISSENSE|Tca/Gca|S344A|402|CRELD2||CODING|NM_001135101.1|10|1);FS=9.098;HaplotypeScore=5.5457;MLEAC=1;MLEAF=0.500;MQ=60.00;MQ0=0;MQRankSum=-0.644;QD=13.06;ReadPosRankSum=0.428 , AC=1;AF=0.500;AN=2;BaseQRankSum=10.26…	chr22.50312282-50321186 ; 22q13.33 ; gain
CRNN	cornulin	0.0833333	AC=1;AF=0.500;AN=2;BaseQRankSum=-3.580;DP=500;Dels=0.00;EFF=NON_SYNONYMOUS_CODING(MODERATE|MISSENSE|Ggg/Tgg|G10W|495|CRNN||CODING|NM_016190.2|2|1);FS=10.598;HaplotypeScore=5.7193;MLEAC=1;MLEAF=0.500;MQ=60.00;MQ0=0;MQRankSum=0.220;QD=12.75;ReadPosRankSum=1.072	chr1.152381718-152386750 ; 1q21.3 ; gain
CRTAM	cytotoxic and regulatory T cell molecule	0.111111	AC=1;AF=0.500;AN=2;BaseQRankSum=-11.485;DP=500;Dels=0.00;EFF=NON_SYNONYMOUS_CODING(MODERATE|MISSENSE|gGa/gTa|G280V|393|CRTAM||CODING|NM_019604.2|8|1);FS=0.000;HaplotypeScore=6.4578;MLEAC=1;MLEAF=0.500;MQ=59.89;MQ0=0;MQRankSum=1.736;QD=24.77;ReadPosRankSum=-0.156	chr11.122709254-122743347 ; 11q24.1 ; gain
CSMD3	CUB and Sushi multiple domains 3	0.388889	AC=1;AF=0.500;AN=2;BaseQRankSum=-12.380;DP=500;Dels=0.00;EFF=NON_SYNONYMOUS_CODING(MODERATE|MISSENSE|Cca/Tca|P2741S|3538|CSMD3||CODING|NM_052900.2|53|1),NON_SYNONYMOUS_CODING(MODERATE|MISSENSE|Cca/Tca|P2870S|3667|CSMD3||CODING|NM_198124.1|56|1),NON_SYNONYMOUS_CODING(MODERATE|MISSENSE|Cca/Tca|P2910S|3707|CSMD3||CODING|NM_198123.1|55|1);FS=5.038;HaplotypeScore=6.5518;MLEAC=1;MLEAF=0.500;MQ=59.99;MQ…	chr8.113235158-114449242 ; 8q23.3 ; gain
CSRP2BP	CSRP2 binding protein	0.0555556	AC=1;AF=0.500;AN=2;BaseQRankSum=-4.243;DP=500;Dels=0.00;EFF=EXON(MODIFIER|||||CSRP2BP||CODING|NR_028402.2|6|1),NON_SYNONYMOUS_CODING(MODERATE|MISSENSE|Gta/Tta|V578L|782|CSRP2BP||CODING|NM_020536.4|7|1);FS=15.300;HaplotypeScore=5.4384;MLEAC=1;MLEAF=0.500;MQ=59.98;MQ0=0;MQRankSum=-1.107;QD=17.57;ReadPosRankSum=2.554	chr20.18122867-18169031 ; 20p11.23 ; gain
CST2	cystatin SA	0.194444	AC=1;AF=0.500;AN=2;BaseQRankSum=-1.974;DB;DP=500;Dels=0.00;EFF=NON_SYNONYMOUS_CODING(MODERATE|MISSENSE|gaA/gaT|E140D|141|CST2||CODING|NM_001322.2|3|1);FS=1.462;HaplotypeScore=7.9034;MLEAC=1;MLEAF=0.500;MQ=55.29;MQ0=0;MQRankSum=3.355;QD=14.11;ReadPosRankSum=1.091	chr20.23804403-23807312 ; 20p11.21 ; gain
CST4	cystatin S	0.0833333	AC=1;AF=0.500;AN=2;BaseQRankSum=-3.497;DP=500;Dels=0.00;EFF=NON_SYNONYMOUS_CODING(MODERATE|MISSENSE|gCc/gTc|A141V|141|CST4||CODING|NM_001899.2|3|1);FS=2.356;HaplotypeScore=10.5874;MLEAC=1;MLEAF=0.500;MQ=55.30;MQ0=0;MQRankSum=6.245;QD=12.43;ReadPosRankSum=3.268	chr20.23666276-23669662 ; 20p11.21 ; gain
CSTL1	cystatin-like 1	0.222222	AC=1;AF=0.500;AN=2;BaseQRankSum=12.258;DB;DP=500;Dels=0.00;EFF=NON_SYNONYMOUS_CODING(MODERATE|MISSENSE|aCg/aTg|T96M|145|CSTL1||CODING|NM_138283.1|3|1);FS=0.000;HaplotypeScore=0.9734;MLEAC=1;MLEAF=0.500;MQ=60.00;MQ0=0;MQRankSum=-0.849;QD=14.38;ReadPosRankSum=0.341	chr20.23420321-23425567 ; 20p11.21 ; gain
CTNNB1	catenin (cadherin-associated protein), beta 1, 88kDa	0.111111	AC=1;AF=0.500;AN=2;BaseQRankSum=-6.905;DB;DP=500;Dels=0.00;EFF=NON_SYNONYMOUS_CODING(MODERATE|MISSENSE|gaC/gaA|D665E|781|CTNNB1||CODING|NM_001098209.1|13|1),NON_SYNONYMOUS_CODING(MODERATE|MISSENSE|gaC/gaA|D665E|781|CTNNB1||CODING|NM_001098210.1|13|1),NON_SYNONYMOUS_CODING(MODERATE|MISSENSE|gaC/gaA|D665E|781|CTNNB1||CODING|NM_001904.3|13|1);FS=475.590;HaplotypeScore=13.2228;MLEAC=1;MLEAF=0.500;MQ=…	chr3.41240941-41281939 ; 3p22.1 ; gain
CWF19L1	CWF19-like 1, cell cycle control (S. pombe)	0.138889	AC=1;AF=0.500;AN=2;BaseQRankSum=-11.724;DB;DP=500;Dels=0.00;EFF=NON_SYNONYMOUS_CODING(MODERATE|MISSENSE|tGt/tAt|C160Y|538|CWF19L1||CODING|NM_018294.4|5|1);FS=3.013;HaplotypeScore=3.9132;MLEAC=1;MLEAF=0.500;MQ=60.00;MQ0=0;MQRankSum=-1.371;QD=13.15;ReadPosRankSum=-0.455	chr10.101992054-102027437 ; 10q24.31 ; gain
CXCR5	chemokine (C-X-C motif) receptor 5	0.0833333	AC=1;AF=0.500;AN=2;BaseQRankSum=-6.713;DP=500;Dels=0.00;EFF=DOWNSTREAM(MODIFIER||||327|CXCR5||CODING|NM_032966.2||1),DOWNSTREAM(MODIFIER||||372|CXCR5||CODING|NM_001716.4||1),NON_SYNONYMOUS_CODING(MODERATE|MISSENSE|Gcg/Tcg|A1367S|1499|BCL9L||CODING|NM_182557.2|8|1);FS=3.616;HaplotypeScore=10.5066;MLEAC=1;MLEAF=0.500;MQ=59.97;MQ0=0;MQRankSum=1.659;QD=20.44;ReadPosRankSum=-1.373	chr11.118754474-118766980 ; 11q23.3 ; gain
CYP2A6	cytochrome P450, family 2, subfamily A, polypeptide 6	0.111111	AC=1;AF=0.500;AN=2;BaseQRankSum=-0.958;DP=500;Dels=0.00;EFF=NON_SYNONYMOUS_CODING(MODERATE|MISSENSE|gaC/gaA|D377E|494|CYP2A6||CODING|NM_000762.5|7|1);FS=25.617;HaplotypeScore=7.7367;MLEAC=1;MLEAF=0.500;MQ=52.77;MQ0=1;MQRankSum=5.864;QD=5.04;ReadPosRankSum=0.757	chr19.41349442-41356352 ; 19q13.2 ; gain
CYP2A7	cytochrome P450, family 2, subfamily A, polypeptide 7	0.166667	AC=2;AF=1.00;AN=2;BaseQRankSum=-2.571;DB;DP=389;Dels=0.00;EFF=NON_SYNONYMOUS_CODING(MODERATE|MISSENSE|tTc/tAc|F341Y|443|CYP2A7||CODING|NM_030589.2|7|1),NON_SYNONYMOUS_CODING(MODERATE|MISSENSE|tTc/tAc|F392Y|494|CYP2A7||CODING|NM_000764.2|8|1);FS=1.679;HaplotypeScore=6.8987;MLEAC=2;MLEAF=1.00;MQ=53.59;MQ0=8;MQRankSum=0.540;QD=29.07;ReadPosRankSum=-1.725	chr19.41381343-41388657 ; 19q13.2 ; gain
CYP8B1	cytochrome P450, family 8, subfamily B, polypeptide 1	0.111111	AC=1;AF=0.500;AN=2;BaseQRankSum=-14.900;DP=500;Dels=0.00;EFF=NON_SYNONYMOUS_CODING(MODERATE|MISSENSE|ttC/ttA|F49L|501|CYP8B1||CODING|NM_004391.2|1|1);FS=3.185;HaplotypeScore=6.4116;MLEAC=1;MLEAF=0.500;MQ=59.89;MQ0=0;MQRankSum=1.053;QD=12.61;ReadPosRankSum=-2.217	chr3.42913683-42917633 ; 3p22.1 ; gain
CYTH3	cytohesin 3	0.0555556	AC=1;AF=0.500;AN=2;BaseQRankSum=-1.679;DP=500;Dels=0.00;EFF=DOWNSTREAM(MODIFIER||||399|CYTH3||CODING|NM_004227.3||1),NON_SYNONYMOUS_CODING(MODERATE|MISSENSE|Gcc/Acc|A1268T|1316|USP42||CODING|NM_032172.2|16|1);FS=2.022;HaplotypeScore=12.6990;MLEAC=1;MLEAF=0.500;MQ=60.00;MQ0=0;MQRankSum=-1.797;QD=12.12;ReadPosRankSum=-0.159	chr7.6201411-6312242 ; 7p22.1 ; gain
DAB2	disabled homolog 2, mitogen-responsive phosphoprotein (Drosophila)	0.138889	AC=2;AF=1.00;AN=2;BaseQRankSum=3.837;DP=499;Dels=0.00;EFF=NON_SYNONYMOUS_CODING(MODERATE|MISSENSE|cGt/cTt|R275L|749|DAB2||CODING|NM_001244871.1|9|1),NON_SYNONYMOUS_CODING(MODERATE|MISSENSE|cGt/cTt|R296L|770|DAB2||CODING|NM_001343.3|10|1);FS=0.000;HaplotypeScore=10.3743;MLEAC=2;MLEAF=1.00;MQ=59.97;MQ0=0;MQRankSum=0.633;QD=28.24;ReadPosRankSum=-0.878	chr5.39371775-39425335 ; 5p13.1 ; gain
DALRD3	DALR anticodon binding domain containing 3	0.111111	AC=1;AF=0.500;AN=2;BaseQRankSum=-6.832;DP=477;Dels=0.00;EFF=DOWNSTREAM(MODIFIER||||376|DALRD3||CODING|NM_018114.5||1),DOWNSTREAM(MODIFIER||||516|DALRD3||CODING|NM_001276405.1||1),DOWNSTREAM(MODIFIER||||543|DALRD3||CODING|NM_001009996.2||1),NON_SYNONYMOUS_CODING(MODERATE|MISSENSE|cAt/cGt|H730R|1151|WDR6||CODING|NM_018031.3|2|1);FS=5.940;HaplotypeScore=11.7659;MLEAC=1;MLEAF=0.500;MQ=60.00;MQ0=0;MQR…	chr3.49052920-49058504 ; 3p21.31 ; gain
DAO	D-amino-acid oxidase	0.111111	AC=1;AF=0.500;AN=2;BaseQRankSum=-8.959;DP=500;Dels=0.00;EFF=NON_SYNONYMOUS_CODING(MODERATE|MISSENSE|tCt/tTt|S166F|347|DAO||CODING|NM_001917.4|6|1);FS=1.129;HaplotypeScore=21.4158;MLEAC=1;MLEAF=0.500;MQ=59.85;MQ0=0;MQRankSum=1.599;QD=16.92;ReadPosRankSum=-2.016	chr12.109273856-109294710 ; 12q24.11 ; gain
DBF4B	DBF4 homolog B (S. cerevisiae)	0.0555556	AC=2;AF=1.00;AN=2;BaseQRankSum=0.941;DP=500;Dels=0.00;EFF=DOWNSTREAM(MODIFIER|||||DBF4B||CODING|NR_036623.1||1),INTRON(MODIFIER||||431|DBF4B||CODING|NM_025104.3|14|1),NON_SYNONYMOUS_CODING(MODERATE|MISSENSE|aaG/aaT|K436N|615|DBF4B||CODING|NM_145663.2|14|1);FS=3.071;HaplotypeScore=7.3150;MLEAC=2;MLEAF=1.00;MQ=60.00;MQ0=0;MQRankSum=0.295;QD=33.44;ReadPosRankSum=3.399 , AC=2;AF=1.00;AN=2;BaseQRankSu…	chr17.42785975-42829636 ; 17q21.31 ; gain
DCAF4L2	WD repeat domain 21C	0.138889	AC=1;AF=0.500;AN=2;BaseQRankSum=2.643;DP=497;Dels=0.00;EFF=NON_SYNONYMOUS_CODING(MODERATE|MISSENSE|Agc/Tgc|S63C|395|DCAF4L2||CODING|NM_152418.3|1|1);FS=1.551;HaplotypeScore=6.4196;MLEAC=1;MLEAF=0.500;MQ=59.96;MQ0=0;MQRankSum=-0.996;QD=20.87;ReadPosRankSum=-0.625	chr8.88882970-88886296 ; 8q21.3 ; gain
DCAF6	IQ motif and WD repeats 1	0.111111	NA	chr1.167905796-168045083 ; 1q24.2 ; gain
DCAKD	dephospho-CoA kinase domain containing	0.0555556	AC=1;AF=0.500;AN=2;BaseQRankSum=-0.269;DB;DP=500;Dels=0.00;EFF=NON_SYNONYMOUS_CODING(MODERATE|MISSENSE|Cgg/Tgg|R147W|231|DCAKD||CODING|NM_001128631.1|5|1),NON_SYNONYMOUS_CODING(MODERATE|MISSENSE|Cgg/Tgg|R147W|231|DCAKD||CODING|NM_024819.4|5|1);FS=6.991;HaplotypeScore=15.1772;MLEAC=1;MLEAF=0.500;MQ=60.00;MQ0=0;MQRankSum=0.714;QD=12.30;ReadPosRankSum=-2.211	chr17.43100705-43138473 ; 17q21.31 ; gain
DDR2	discoidin domain receptor tyrosine kinase 2	0.138889	AC=2;AF=1.00;AN=2;BaseQRankSum=2.050;DP=497;Dels=0.00;EFF=NON_SYNONYMOUS_CODING(MODERATE|MISSENSE|tGg/tTg|W778L|855|DDR2||CODING|NM_001014796.1|18|1),NON_SYNONYMOUS_CODING(MODERATE|MISSENSE|tGg/tTg|W778L|855|DDR2||CODING|NM_006182.2|17|1);FS=2.965;HaplotypeScore=10.3569;MLEAC=2;MLEAF=1.00;MQ=60.00;MQ0=0;MQRankSum=-0.716;QD=34.51;ReadPosRankSum=-2.021	chr1.162602227-162750247 ; 1q23.3 ; gain
DEFB115	defensin, beta 115	0.111111	AC=1;AF=0.500;AN=2;BaseQRankSum=-11.962;DP=500;Dels=0.00;EFF=NON_SYNONYMOUS_CODING(MODERATE|MISSENSE|gGa/gTa|G33V|88|DEFB115||CODING|NM_001037730.1|2|1);FS=1.958;HaplotypeScore=2.5584;MLEAC=1;MLEAF=0.500;MQ=60.00;MQ0=0;MQRankSum=2.017;QD=15.96;ReadPosRankSum=-2.594	chr20.29845466-29847435 ; 20q11.21 ; gain
DENND5B	DENN/MADD domain containing 5B	0.0833333	AC=1;AF=0.500;AN=2;BaseQRankSum=-10.519;DP=500;Dels=0.00;EFF=NON_SYNONYMOUS_CODING(MODERATE|MISSENSE|gGa/gTa|G666V|1274|DENND5B||CODING|NM_144973.3|7|1);FS=2.848;HaplotypeScore=43.4243;MLEAC=1;MLEAF=0.500;MQ=59.99;MQ0=0;MQRankSum=-0.071;QD=14.41;ReadPosRankSum=-1.398	chr12.31535156-31743952 ; 12p11.21 ; gain
DGCR8	DiGeorge syndrome critical region gene 8	0.166667	AC=1;AF=0.500;AN=2;BaseQRankSum=6.637;DP=500;Dels=0.00;EFF=NON_SYNONYMOUS_CODING(MODERATE|MISSENSE|cGa/cTa|R537L|740|DGCR8||CODING|NM_001190326.1|8|1),NON_SYNONYMOUS_CODING(MODERATE|MISSENSE|cGa/cTa|R570L|773|DGCR8||CODING|NM_022720.6|9|1);FS=3.369;HaplotypeScore=15.8421;MLEAC=1;MLEAF=0.500;MQ=59.95;MQ0=0;MQRankSum=2.273;QD=13.08;ReadPosRankSum=3.735	chr22.20067754-20099400 ; 22q11.21 ; gain
DHRS2	dehydrogenase/reductase (SDR family) member 2	0.111111	AC=2;AF=1.00;AN=2;BaseQRankSum=-1.552;DP=500;Dels=0.00;EFF=NON_SYNONYMOUS_CODING(MODERATE|MISSENSE|Cat/Aat|H227N|280|DHRS2||CODING|NM_005794.3|8|1),NON_SYNONYMOUS_CODING(MODERATE|MISSENSE|ttC/ttA|F230L|300|DHRS2||CODING|NM_182908.4|8|1);FS=3.134;HaplotypeScore=4.7694;MLEAC=2;MLEAF=1.00;MQ=59.97;MQ0=0;MQRankSum=1.275;QD=31.66;ReadPosRankSum=-0.831	chr14.24105572-24114848 ; 14q11.2 ; gain
DHTKD1	dehydrogenase E1 and transketolase domain containing 1	0.0555556	AC=1;AF=0.500;AN=2;BaseQRankSum=-5.115;DP=500;Dels=0.00;EFF=NON_SYNONYMOUS_CODING(MODERATE|MISSENSE|Cct/Tct|P343S|919|DHTKD1||CODING|NM_018706.5|6|1);FS=2.327;HaplotypeScore=6.5532;MLEAC=1;MLEAF=0.500;MQ=60.00;MQ0=0;MQRankSum=-1.085;QD=12.73;ReadPosRankSum=-1.762	chr10.12110933-12165224 ; 10p14 ; gain
DHX58	DEXH (Asp-Glu-X-His) box polypeptide 58	0.0555556	NA	chr17.40253421-40264751 ; 17q21.2 ; gain
DIP2C	DIP2 disco-interacting protein 2 homolog C (Drosophila)	0.0555556	AC=1;AF=0.500;AN=2;BaseQRankSum=13.125;DP=500;Dels=0.00;EFF=NON_SYNONYMOUS_CODING(MODERATE|MISSENSE|Gtt/Att|V1470I|1556|DIP2C||CODING|NM_014974.2|36|1);FS=8.952;HaplotypeScore=4.2388;MLEAC=1;MLEAF=0.500;MQ=60.00;MQ0=0;MQRankSum=0.687;QD=13.69;ReadPosRankSum=1.024	chr10.320129-735608 ; 10p15.3 ; gain
DLGAP2	discs, large (Drosophila) homolog-associated protein 2	0.0833333	AC=1;AF=0.500;AN=2;BaseQRankSum=6.980;DP=338;Dels=0.00;EFF=NON_SYNONYMOUS_CODING(MODERATE|MISSENSE|cGc/cTc|R93L|975|DLGAP2||CODING|NM_004745.3|2|1);FS=6.705;HaplotypeScore=7.1380;MLEAC=1;MLEAF=0.500;MQ=60.00;MQ0=0;MQRankSum=-0.315;QD=20.06;ReadPosRankSum=-0.084	chr8.1449531-1656642 ; 8p23.3 ; gain
DMBT1	deleted in malignant brain tumors 1	0.111111	AC=1;AF=0.500;AN=2;BaseQRankSum=-12.490;DP=500;Dels=0.00;EFF=NON_SYNONYMOUS_CODING(MODERATE|MISSENSE|Tgg/Cgg|W1004R|2403|DMBT1||CODING|NM_017579.2|25|1),NON_SYNONYMOUS_CODING(MODERATE|MISSENSE|Tgg/Cgg|W1014R|2413|DMBT1||CODING|NM_007329.2|26|1),NON_SYNONYMOUS_CODING(MODERATE|MISSENSE|Tgg/Cgg|W515R|1785|DMBT1||CODING|NM_004406.2|16|1);FS=1.917;HaplotypeScore=6.7428;MLEAC=1;MLEAF=0.500;MQ=59.13;MQ0…	chr10.124320180-124403252 ; 10q26.13 ; gain
DMKN	dermokine	0.361111	AC=1;AF=0.500;AN=2;BaseQRankSum=-6.658;DP=500;Dels=0.00;EFF=DOWNSTREAM(MODIFIER||||369|DMKN||CODING|NM_001190349.1||1),DOWNSTREAM(MODIFIER||||386|DMKN||CODING|NM_001126058.2||1),DOWNSTREAM(MODIFIER||||398|DMKN||CODING|NM_001126057.2||1),DOWNSTREAM(MODIFIER||||436|DMKN||CODING|NM_001190348.1||1),EXON(MODIFIER|||||DMKN||CODING|NR_033746.1|7|1),NON_SYNONYMOUS_CODING(MODERATE|MISSENSE|Ctc/Atc|L119I|1…	chr19.35988118-36004560 ; 19q13.12 ; gain
DMP1	dentin matrix acidic phosphoprotein 1	0.0833333	AC=1;AF=0.500;AN=2;BaseQRankSum=-7.412;DP=500;Dels=0.00;EFF=NON_SYNONYMOUS_CODING(MODERATE|MISSENSE|gaC/gaA|D203E|497|DMP1||CODING|NM_001079911.2|5|1),NON_SYNONYMOUS_CODING(MODERATE|MISSENSE|gaC/gaA|D219E|513|DMP1||CODING|NM_004407.3|6|1);FS=1.058;HaplotypeScore=5.5631;MLEAC=1;MLEAF=0.500;MQ=60.00;MQ0=0;MQRankSum=0.835;QD=11.85;ReadPosRankSum=1.538	chr4.88571453-88585512 ; 4q22.1 ; gain
DMWD	dystrophia myotonica, WD repeat containing	0.0833333	NA	chr19.46286263-46296060 ; 19q13.32 ; gain
DMXL2	Dmx-like 2	0.5	AC=1;AF=0.500;AN=2;BaseQRankSum=8.548;DB;DP=500;Dels=0.00;EFF=INTRON(MODIFIER||||2400|DMXL2||CODING|NM_001174117.1|16|1),NON_SYNONYMOUS_CODING(MODERATE|MISSENSE|Tct/Cct|S1288P|3036|DMXL2||CODING|NM_015263.3|18|1),NON_SYNONYMOUS_CODING(MODERATE|MISSENSE|Tct/Cct|S1288P|3037|DMXL2||CODING|NM_001174116.1|18|1);FS=0.323;HaplotypeScore=4.9192;MLEAC=1;MLEAF=0.500;MQ=60.00;MQ0=0;MQRankSum=-0.571;QD=13.91…	chr15.51739920-51914967 ; 15q21.2 ; gain
DNAH1	dynein, axonemal, heavy chain 1	0.166667	AC=1;AF=0.500;AN=2;BaseQRankSum=-8.832;DP=500;Dels=0.00;EFF=NON_SYNONYMOUS_CODING(MODERATE|MISSENSE|ttG/ttT|L1340F|4265|DNAH1||CODING|NM_015512.4|24|1);FS=0.333;HaplotypeScore=4.7923;MLEAC=1;MLEAF=0.500;MQ=60.00;MQ0=0;MQRankSum=0.578;QD=12.63;ReadPosRankSum=0.602	chr3.52350334-52434513 ; 3p21.1 ; gain
DNAH10	dynein, axonemal, heavy chain 10	0.166667	AC=1;AF=0.500;AN=2;BaseQRankSum=-5.878;DP=500;Dels=0.00;EFF=NON_SYNONYMOUS_CODING(MODERATE|MISSENSE|aaC/aaA|N2124K|4471|DNAH10||CODING|NM_207437.3|37|1);FS=5.160;HaplotypeScore=19.1951;MLEAC=1;MLEAF=0.500;MQ=59.95;MQ0=0;MQRankSum=-1.684;QD=6.23;ReadPosRankSum=2.951	chr12.124247041-124420267 ; 12q24.31 ; gain
DNAH11	dynein, axonemal, heavy chain 11	0.0555556	AC=2;AF=1.00;AN=2;BaseQRankSum=1.690;DP=500;Dels=0.00;EFF=NON_SYNONYMOUS_CODING(MODERATE|MISSENSE|cGa/cAa|R1843Q|4523|DNAH11||CODING|NM_003777.3|33|1);FS=4.549;HaplotypeScore=2.5728;MLEAC=2;MLEAF=1.00;MQ=59.97;MQ0=0;MQRankSum=-0.342;QD=32.80;ReadPosRankSum=-0.573	chr7.21582832-21941186 ; 7p15.3 ; loss
DNAH12	dynein, axonemal, heavy chain 12	0.111111	AC=1;AF=0.500;AN=2;BaseQRankSum=-10.531;DP=500;Dels=0.00;EFF=NON_SYNONYMOUS_CODING(MODERATE|MISSENSE|Ctg/Gtg|L480V|3092|DNAH12||CODING|NM_178504.4|12|1);FS=1.472;HaplotypeScore=5.4078;MLEAC=1;MLEAF=0.500;MQ=60.00;MQ0=0;MQRankSum=0.974;QD=11.02;ReadPosRankSum=-0.327	chr3.57327726-57530071 ; 3p14.3 ; gain
DNAJA1	DnaJ (Hsp40) homolog, subfamily A, member 1	0.111111	AC=1;AF=0.500;AN=2;BaseQRankSum=0.023;DP=500;Dels=0.00;EFF=NON_SYNONYMOUS_CODING(MODERATE|MISSENSE|aGa/aCa|R192T|397|DNAJA1||CODING|NM_001539.2|5|1);FS=0.000;HaplotypeScore=3.6727;MLEAC=1;MLEAF=0.500;MQ=59.97;MQ0=0;MQRankSum=1.634;QD=5.80;ReadPosRankSum=-1.115	chr9.33025208-33039062 ; 9p21.1 ; gain
DNASE1L3	deoxyribonuclease I-like 3	0.166667	AC=2;AF=1.00;AN=2;BaseQRankSum=1.713;DB;DP=294;Dels=0.00;EFF=NON_SYNONYMOUS_CODING(MODERATE|MISSENSE|Cgc/Tgc|R176C|275|DNASE1L3||CODING|NM_001256560.1|5|1),NON_SYNONYMOUS_CODING(MODERATE|MISSENSE|Cgc/Tgc|R206C|305|DNASE1L3||CODING|NM_004944.3|6|1);FS=0.000;HaplotypeScore=5.6725;MLEAC=2;MLEAF=1.00;MQ=60.00;MQ0=0;MQRankSum=-0.867;QD=32.47;ReadPosRankSum=-0.326	chr3.58178352-58196730 ; 3p14.3 ; gain
DOCK3	dedicator of cytokinesis 3	0.222222	AC=1;AF=0.500;AN=2;BaseQRankSum=5.749;DB;DP=500;Dels=0.00;EFF=NON_SYNONYMOUS_CODING(MODERATE|MISSENSE|cGg/cAg|R621Q|2030|DOCK3||CODING|NM_004947.4|19|1);FS=11.499;HaplotypeScore=7.4989;MLEAC=1;MLEAF=0.500;MQ=60.00;MQ0=0;MQRankSum=0.178;QD=13.68;ReadPosRankSum=0.572	chr3.50712671-51421629 ; 3p21.2 ; gain
DOCK5	dedicator of cytokinesis 5	0.416667	AC=2;AF=1.00;AN=2;BaseQRankSum=-0.712;DB;DP=500;Dels=0.00;EFF=NON_SYNONYMOUS_CODING(MODERATE|MISSENSE|cAg/cGg|Q1023R|1870|DOCK5||CODING|NM_024940.6|30|1);FS=3.792;HaplotypeScore=2.9636;MLEAC=2;MLEAF=1.00;MQ=60.00;MQ0=0;MQRankSum=0.725;QD=33.76;ReadPosRankSum=-0.073	chr8.25042286-25270619 ; 8p21.2 ; gain
DPAGT1	dolichyl-phosphate (UDP-N-acetylglucosamine) N-acetylglucosaminephosphotransferase 1 (GlcNAc-1-P transferase)	0.111111	AC=1;AF=0.500;AN=2;BaseQRankSum=5.192;DP=488;Dels=0.00;EFF=NON_SYNONYMOUS_CODING(MODERATE|MISSENSE|gTg/gAg|V60E|408|DPAGT1||CODING|NM_001382.3|2|1);FS=0.000;HaplotypeScore=6.4281;MLEAC=1;MLEAF=0.500;MQ=59.78;MQ0=0;MQRankSum=-0.689;QD=12.45;ReadPosRankSum=-1.051	chr11.118967212-118972785 ; 11q23.3 ; gain
DPEP3	dipeptidase 3	0.111111	AC=1;AF=0.500;AN=2;BaseQRankSum=12.641;DB;DP=500;Dels=0.00;EFF=NON_SYNONYMOUS_CODING(MODERATE|MISSENSE|cGt/cAt|R422H|512|DPEP3||CODING|NM_001129758.1|9|1),NON_SYNONYMOUS_CODING(MODERATE|MISSENSE|cGt/cAt|R423H|513|DPEP3||CODING|NM_022357.3|9|1);FS=2.616;HaplotypeScore=9.7322;MLEAC=1;MLEAF=0.500;MQ=59.78;MQ0=0;MQRankSum=1.600;QD=10.56;ReadPosRankSum=1.083	chr16.68009565-68014452 ; 16q22.1 ; gain
DPP10	dipeptidyl-peptidase 10	0.0555556	AC=2;AF=1.00;AN=2;BaseQRankSum=1.103;DP=500;Dels=0.00;EFF=NON_SYNONYMOUS_CODING(MODERATE|MISSENSE|Gaa/Caa|E147Q|746|DPP10||CODING|NM_001178036.1|9|1),NON_SYNONYMOUS_CODING(MODERATE|MISSENSE|Gaa/Caa|E190Q|789|DPP10||CODING|NM_001004360.3|8|1),NON_SYNONYMOUS_CODING(MODERATE|MISSENSE|Gaa/Caa|E193Q|792|DPP10||CODING|NM_001178037.1|8|1),NON_SYNONYMOUS_CODING(MODERATE|MISSENSE|Gaa/Caa|E197Q|796|DPP10||…	chr2.115199898-116602326 ; 2q14.1 ; gain
DPP3	dipeptidyl-peptidase 3	0.25	AC=2;AF=1.00;AN=2;DB;DP=500;Dels=0.00;EFF=NON_SYNONYMOUS_CODING(MODERATE|MISSENSE|caG/caT|Q115H|707|DPP3||CODING|NM_001256670.1|3|1),NON_SYNONYMOUS_CODING(MODERATE|MISSENSE|caG/caT|Q145H|737|DPP3||CODING|NM_005700.4|4|1),NON_SYNONYMOUS_CODING(MODERATE|MISSENSE|caG/caT|Q145H|737|DPP3||CODING|NM_130443.3|4|1);FS=0.000;HaplotypeScore=6.1660;MLEAC=2;MLEAF=1.00;MQ=60.00;MQ0=0;QD=32.05	chr11.66247483-66277130 ; 11q13.2 ; gain
DSC1	desmocollin 1	0.277778	AC=1;AF=0.500;AN=2;BaseQRankSum=9.058;DB;DP=500;Dels=0.00;EFF=NON_SYNONYMOUS_CODING(MODERATE|MISSENSE|Gtt/Att|V460I|840|DSC1||CODING|NM_004948.3|10|1),NON_SYNONYMOUS_CODING(MODERATE|MISSENSE|Gtt/Att|V460I|894|DSC1||CODING|NM_024421.2|10|1);FS=14.536;HaplotypeScore=5.7506;MLEAC=1;MLEAF=0.500;MQ=60.00;MQ0=0;MQRankSum=-2.006;QD=13.82;ReadPosRankSum=-0.743	chr18.28709213-28742819 ; 18q12.1 ; gain
DSCAML1	Down syndrome cell adhesion molecule like 1	0.138889	AC=2;AF=1.00;AN=2;BaseQRankSum=-2.070;DP=319;Dels=0.00;EFF=NON_SYNONYMOUS_CODING(MODERATE|MISSENSE|Ctc/Atc|L1769I|2113|DSCAML1||CODING|NM_020693.2|30|1);FS=0.000;HaplotypeScore=17.2125;MLEAC=2;MLEAF=1.00;MQ=59.96;MQ0=0;MQRankSum=-0.062;QD=29.14;ReadPosRankSum=0.498	chr11.117298488-117667976 ; 11q23.3 ; gain
DSP	desmoplakin	0.138889	NA	chr6.7541869-7586946 ; 6p24.3 ; gain
DTX2	deltex homolog 2 (Drosophila)	0.0833333	AC=1;AF=0.500;AN=2;BaseQRankSum=-6.399;DP=500;Dels=0.00;EFF=NON_SYNONYMOUS_CODING(MODERATE|MISSENSE|Ccc/Tcc|P227S|575|DTX2||CODING|NM_001102596.1|2|1),NON_SYNONYMOUS_CODING(MODERATE|MISSENSE|Ccc/Tcc|P227S|622|DTX2||CODING|NM_001102594.1|4|1),NON_SYNONYMOUS_CODING(MODERATE|MISSENSE|Ccc/Tcc|P227S|622|DTX2||CODING|NM_001102595.1|3|1),NON_SYNONYMOUS_CODING(MODERATE|MISSENSE|Ccc/Tcc|P227S|622|DTX2||CO…	chr7.76090971-76135312 ; 7q11.23 ; gain
DUOX1	dual oxidase 1	0.305556	AC=1;AF=0.500;AN=2;BaseQRankSum=-13.505;DB;DP=500;Dels=0.00;EFF=NON_SYNONYMOUS_CODING(MODERATE|MISSENSE|Tgt/Cgt|C1026R|1551|DUOX1||CODING|NM_017434.3|25|1),NON_SYNONYMOUS_CODING(MODERATE|MISSENSE|Tgt/Cgt|C1026R|1551|DUOX1||CODING|NM_175940.1|24|1);FS=11.343;HaplotypeScore=5.2862;MLEAC=1;MLEAF=0.500;MQ=60.00;MQ0=0;MQRankSum=0.513;QD=10.52;ReadPosRankSum=-0.102	chr15.45422191-45457774 ; 15q21.1 ; gain
DYNC1I1	dynein, cytoplasmic 1, intermediate chain 1	0.222222	AC=1;AF=0.500;AN=2;BaseQRankSum=-1.220;DP=500;Dels=0.00;EFF=NON_SYNONYMOUS_CODING(MODERATE|MISSENSE|Gat/Tat|D116Y|645|DYNC1I1||CODING|NM_004411.4|4|1),NON_SYNONYMOUS_CODING(MODERATE|MISSENSE|Gat/Tat|D99Y|608|DYNC1I1||CODING|NM_001135557.1|4|1),NON_SYNONYMOUS_CODING(MODERATE|MISSENSE|Gat/Tat|D99Y|628|DYNC1I1||CODING|NM_001135556.1|4|1);FS=3.699;HaplotypeScore=9.0600;MLEAC=1;MLEAF=0.500;MQ=60.06;MQ…	chr7.95401817-95727736 ; 7q21.3 ; gain
DYSF	dysferlin, limb girdle muscular dystrophy 2B (autosomal recessive)	0.0555556	NA	chr2.71680752-71913893 ; 2p13.2 ; loss
ECD	ecdysoneless homolog (Drosophila)	0.0833333	AC=1;AF=0.500;AN=2;BaseQRankSum=3.962;DP=500;Dels=0.00;EFF=EXON(MODIFIER|||||ECD||CODING|NR_024203.1|4|1),NON_SYNONYMOUS_CODING(MODERATE|MISSENSE|Cgc/Tgc|R194C|601|ECD||CODING|NM_001135753.1|5|1),NON_SYNONYMOUS_CODING(MODERATE|MISSENSE|Cgc/Tgc|R194C|644|ECD||CODING|NM_007265.2|5|1),NON_SYNONYMOUS_CODING(MODERATE|MISSENSE|Cgc/Tgc|R194C|677|ECD||CODING|NM_001135752.1|5|1);FS=5.575;HaplotypeScore=3.…	chr10.74894281-74927853 ; 10q22.1 ; gain
EEA1	early endosome antigen 1	0.111111	AC=1;AF=0.500;AN=2;BaseQRankSum=12.743;DP=500;Dels=0.00;EFF=NON_SYNONYMOUS_CODING(MODERATE|MISSENSE|Aaa/Gaa|K658E|1411|EEA1||CODING|NM_003566.3|16|1);FS=8.334;HaplotypeScore=7.3626;MLEAC=1;MLEAF=0.500;MQ=60.00;MQ0=0;MQRankSum=1.894;QD=13.97;ReadPosRankSum=-0.033	chr12.93166284-93323107 ; 12q22 ; gain
EGFR	epidermal growth factor receptor (erythroblastic leukemia viral (v-erb-b) oncogene homolog, avian)	0.138889	AC=1;AF=0.500;AN=2;BaseQRankSum=-7.701;DB;DP=500;Dels=0.00;EFF=NON_SYNONYMOUS_CODING(MODERATE|MISSENSE|cTg/cGg|L858R|1210|EGFR||CODING|NM_005228.3|21|1),UPSTREAM(MODIFIER|||||EGFR-AS1||NON_CODING|NR_047551.1||1);FS=2.047;HaplotypeScore=6.2506;MLEAC=1;MLEAF=0.500;MQ=60.00;MQ0=0;MQRankSum=1.032;QD=16.66;ReadPosRankSum=-0.987	chr7.55086724-55275031 ; 7p11.2 ; gain
EHD2	EH-domain containing 2	0.0555556	AC=1;AF=0.500;AN=2;BaseQRankSum=-2.602;DP=500;Dels=0.00;EFF=NON_SYNONYMOUS_CODING(MODERATE|MISSENSE|aCc/aTc|T405I|543|EHD2||CODING|NM_014601.3|6|1),UPSTREAM(MODIFIER||||478|GLTSCR2||CODING|NM_015710.4||1);FS=40.759;HaplotypeScore=19.6005;MLEAC=1;MLEAF=0.500;MQ=60.00;MQ0=0;MQRankSum=-0.174;QD=13.24;ReadPosRankSum=-0.637	chr19.48216600-48246391 ; 19q13.33 ; gain
EHD4	EH-domain containing 4	0.305556	AC=1;AF=0.500;AN=2;BaseQRankSum=-5.807;DP=272;Dels=0.00;EFF=NON_SYNONYMOUS_CODING(MODERATE|MISSENSE|aGc/aAc|S522N|541|EHD4||CODING|NM_139265.3|6|1);FS=5.180;HaplotypeScore=9.2426;MLEAC=1;MLEAF=0.500;MQ=59.80;MQ0=1;MQRankSum=-2.293;QD=2.68;ReadPosRankSum=-0.449	chr15.42191638-42264755 ; 15q15.1 ; gain
EIF2A	eukaryotic translation initiation factor 2A, 65kDa	0.444444	AC=1;AF=0.500;AN=2;BaseQRankSum=-0.875;DB;DP=500;Dels=0.00;EFF=NON_SYNONYMOUS_CODING(MODERATE|MISSENSE|aCt/aGt|T97S|585|EIF2A||CODING|NM_032025.3|4|1);FS=4.044;HaplotypeScore=3.8028;MLEAC=1;MLEAF=0.500;MQ=60.13;MQ0=0;MQRankSum=-0.505;QD=14.68;ReadPosRankSum=-1.558	chr3.150264573-150303803 ; 3q25.1 ; gain
ELK3	ELK3, ETS-domain protein (SRF accessory protein 2)	0.0833333	NA	chr12.96588206-96661606 ; 12q23.1 ; gain
ELOVL4	elongation of very long chain fatty acids (FEN1/Elo2, SUR4/Elo3, yeast)-like 4	0.0555556	AC=1;AF=0.500;AN=2;BaseQRankSum=-2.946;DP=500;Dels=0.00;EFF=NON_SYNONYMOUS_CODING(MODERATE|MISSENSE|tGg/tTg|W47L|314|ELOVL4||CODING|NM_022726.3|2|1);FS=4.826;HaplotypeScore=12.9810;MLEAC=1;MLEAF=0.500;MQ=60.00;MQ0=0;MQRankSum=1.318;QD=11.31;ReadPosRankSum=-2.204	chr6.80624528-80657315 ; 6q14.1 ; gain
EMILIN2	elastin microfibril interfacer 2	0.0555556	AC=1;AF=0.500;AN=2;BaseQRankSum=-8.705;DP=500;Dels=0.00;EFF=NON_SYNONYMOUS_CODING(MODERATE|MISSENSE|Gaa/Aaa|E181K|1053|EMILIN2||CODING|NM_032048.2|4|1);FS=1.453;HaplotypeScore=1.9305;MLEAC=1;MLEAF=0.500;MQ=60.00;MQ0=0;MQRankSum=-0.091;QD=14.05;ReadPosRankSum=-1.535	chr18.2847027-2914090 ; 18p11.32 ; gain
EML6	echinoderm microtubule associated protein like 6	0.0555556	AC=1;AF=0.500;AN=2;BaseQRankSum=1.502;DP=500;Dels=0.00;EFF=NON_SYNONYMOUS_CODING(MODERATE|MISSENSE|Gat/Tat|D1192Y|1958|EML6||CODING|NM_001039753.2|25|1);FS=20.883;HaplotypeScore=8.0065;MLEAC=1;MLEAF=0.500;MQ=60.00;MQ0=0;MQRankSum=0.158;QD=13.51;ReadPosRankSum=1.774	chr2.54952148-55199156 ; 2p16.2 ; loss
ENKUR	enkurin, TRPC channel interacting protein	0.0833333	AC=1;AF=0.500;AN=2;BaseQRankSum=7.192;DP=500;Dels=0.00;EFF=INTRON(MODIFIER||||194|ENKUR||CODING|NM_001270383.1|2|1),NON_SYNONYMOUS_CODING(MODERATE|MISSENSE|Att/Ctt|I514L|743|THNSL1||CODING|NM_024838.4|3|1);FS=0.000;HaplotypeScore=8.3191;MLEAC=1;MLEAF=0.500;MQ=60.00;MQ0=0;MQRankSum=1.246;QD=5.03;ReadPosRankSum=-0.173	chr10.25270907-25351208 ; 10p12.1 ; gain
EPHA5	EPH receptor A5	0.138889	NA	chr4.66185280-66535653 ; 4q13.1 ; gain
ESRP1	epithelial splicing regulatory protein 1	0.111111	NA	chr8.95653363-95719694 ; 8q22.1 ; gain
EXOSC4	exosome component 4	0.0833333	AC=1;AF=0.500;AN=2;BaseQRankSum=-1.889;DP=500;Dels=0.00;EFF=DOWNSTREAM(MODIFIER||||245|EXOSC4||CODING|NM_019037.2||1),NON_SYNONYMOUS_CODING(MODERATE|MISSENSE|Gat/Tat|D236Y|621|GPAA1||CODING|NM_003801.3|6|1);FS=0.000;HaplotypeScore=12.5732;MLEAC=1;MLEAF=0.500;MQ=59.98;MQ0=0;MQRankSum=0.543;QD=13.66;ReadPosRankSum=1.202	chr8.145133521-145135551 ; 8q24.3 ; gain
EXPH5	exophilin 5	0.694444	AC=1;AF=0.500;AN=2;BaseQRankSum=13.753;DB;DP=500;Dels=0.00;EFF=NON_SYNONYMOUS_CODING(MODERATE|MISSENSE|Gga/Aga|G1663R|1989|EXPH5||CODING|NM_015065.2|6|1);FS=2.602;HaplotypeScore=2.4524;MLEAC=1;MLEAF=0.500;MQ=59.94;MQ0=0;MQRankSum=0.520;QD=22.14;ReadPosRankSum=-0.789 , AC=1;AF=0.500;AN=2;BaseQRankSum=-13.357;DB;DP=500;Dels=0.00;EFF=NON_SYNONYMOUS_CODING(MODERATE|MISSENSE|Agg/Ggg|R19G|1989|EXPH5||C…	chr11.108376157-108464374 ; 11q22.3 ; gain
FAM118B	family with sequence similarity 118, member B	0.0555556	AC=2;AF=1.00;AN=2;BaseQRankSum=-0.163;DP=432;Dels=0.00;EFF=NON_SYNONYMOUS_CODING(MODERATE|MISSENSE|Ggg/Tgg|G176W|351|FAM118B||CODING|NM_024556.3|5|1);FS=4.672;HaplotypeScore=7.3064;MLEAC=2;MLEAF=1.00;MQ=60.00;MQ0=0;MQRankSum=1.216;QD=31.25;ReadPosRankSum=0.122	chr11.126081618-126132879 ; 11q24.2 ; gain
FAM135B	family with sequence similarity 135, member B	0.166667	AC=1;AF=0.500;AN=2;BaseQRankSum=0.385;DP=500;Dels=0.00;EFF=NON_SYNONYMOUS_CODING(MODERATE|MISSENSE|atC/atG|I1346M|1406|FAM135B||CODING|NM_015912.3|20|1);FS=2.602;HaplotypeScore=2.7444;MLEAC=1;MLEAF=0.500;MQ=60.00;MQ0=0;MQRankSum=0.307;QD=18.38;ReadPosRankSum=0.211	chr8.139142265-139509065 ; 8q24.23 ; gain
FAM170B	family with sequence similarity 170, member B	0.138889	AC=1;AF=0.500;AN=2;BaseQRankSum=1.341;DP=162;Dels=0.00;EFF=INTRON(MODIFIER|||||FAM170B-AS1||NON_CODING|NR_038973.1|1|1),NON_SYNONYMOUS_CODING(MODERATE|MISSENSE|cCa/cGa|P75R|283|FAM170B||CODING|NM_001164484.1|2|1);FS=0.583;HaplotypeScore=0.0000;MLEAC=1;MLEAF=0.500;MQ=60.00;MQ0=0;MQRankSum=-0.015;QD=12.18;ReadPosRankSum=-0.367 , AC=1;AF=0.500;AN=2;BaseQRankSum=3.023;DP=160;Dels=0.00;EFF=INTRON(MODI…	chr10.50339200-50342065 ; 10q11.23 ; gain
FAM171A1	family with sequence similarity 171, member A1	0.0833333	AC=1;AF=0.500;AN=2;BaseQRankSum=6.610;DP=500;Dels=0.00;EFF=NON_SYNONYMOUS_CODING(MODERATE|MISSENSE|Gac/Tac|D675Y|890|FAM171A1||CODING|NM_001010924.1|8|1);FS=3.456;HaplotypeScore=4.4179;MLEAC=1;MLEAF=0.500;MQ=59.97;MQ0=0;MQRankSum=0.015;QD=13.89;ReadPosRankSum=-1.189	chr10.15253643-15413058 ; 10p13 ; gain
FAM187B	family with sequence similarity 187, member B	0.0555556	AC=2;AF=1.00;AN=2;BaseQRankSum=1.230;DP=500;Dels=0.00;EFF=NON_SYNONYMOUS_CODING(MODERATE|MISSENSE|aTt/aCt|I168T|369|FAM187B||CODING|NM_152481.1|1|1);FS=0.000;HaplotypeScore=10.3690;MLEAC=2;MLEAF=1.00;MQ=59.94;MQ0=1;MQRankSum=0.417;QD=34.09;ReadPosRankSum=-1.485	chr19.35715703-35719628 ; 19q13.12 ; gain
FAM5C	family with sequence similarity 5, member C	0.25	AC=1;AF=0.500;AN=2;BaseQRankSum=-3.351;DP=500;Dels=0.00;EFF=NON_SYNONYMOUS_CODING(MODERATE|MISSENSE|Gac/Tac|D45Y|766|FAM5C||CODING|NM_199051.1|2|1);FS=3.538;HaplotypeScore=3.9710;MLEAC=1;MLEAF=0.500;MQ=60.00;MQ0=0;MQRankSum=-1.546;QD=9.32;ReadPosRankSum=-0.911	chr1.190066796-190446759 ; 1q31.1 ; loss
FAM71B	family with sequence similarity 71, member B	0.0833333	AC=1;AF=0.500;AN=2;BaseQRankSum=5.386;DP=500;Dels=0.00;EFF=NON_SYNONYMOUS_CODING(MODERATE|MISSENSE|caC/caA|H242Q|605|FAM71B||CODING|NM_130899.2|2|1);FS=7.509;HaplotypeScore=1.7653;MLEAC=1;MLEAF=0.500;MQ=60.00;MQ0=0;MQRankSum=0.118;QD=6.95;ReadPosRankSum=0.687	chr5.156589343-156593279 ; 5q33.3 ; gain
FAM83B	family with sequence similarity 83, member B	0.0555556	AC=1;AF=0.500;AN=2;BaseQRankSum=-6.301;DP=500;Dels=0.00;EFF=NON_SYNONYMOUS_CODING(MODERATE|MISSENSE|aGg/aTg|R203M|1011|FAM83B||CODING|NM_001010872.2|3|1);FS=2.419;HaplotypeScore=9.4555;MLEAC=1;MLEAF=0.500;MQ=59.94;MQ0=0;MQRankSum=-1.230;QD=24.33;ReadPosRankSum=1.177	chr6.54711568-54809897 ; 6p12.1 ; loss
FAM83C	family with sequence similarity 83, member C	0.111111	AC=1;AF=0.500;AN=2;BaseQRankSum=-8.136;DP=500;Dels=0.00;EFF=NON_SYNONYMOUS_CODING(MODERATE|MISSENSE|gGa/gAa|G521E|747|FAM83C||CODING|NM_178468.5|4|1),UPSTREAM(MODIFIER||||226|EIF6||CODING|NM_181466.2||1),UPSTREAM(MODIFIER||||245|EIF6||CODING|NM_001267810.1||1),UPSTREAM(MODIFIER||||245|EIF6||CODING|NM_002212.3||1),UPSTREAM(MODIFIER||||245|EIF6||CODING|NM_181468.2||1),UPSTREAM(MODIFIER|||||EIF6||CO…	chr20.33873533-33880225 ; 20q11.22 ; gain
FANK1	fibronectin type III and ankyrin repeat domains 1	0.0833333	AC=1;AF=0.500;AN=2;BaseQRankSum=5.851;DP=500;Dels=0.00;EFF=NON_SYNONYMOUS_CODING(MODERATE|MISSENSE|Cgc/Tgc|R84C|345|FANK1||CODING|NM_145235.3|3|1);FS=28.223;HaplotypeScore=5.4647;MLEAC=1;MLEAF=0.500;MQ=60.00;MQ0=0;MQRankSum=2.711;QD=13.32;ReadPosRankSum=0.171	chr10.127585107-127698161 ; 10q26.2 ; gain
FAP	fibroblast activation protein, alpha	0.0555556	AC=1;AF=0.500;AN=2;BaseQRankSum=-12.449;DP=500;Dels=0.00;EFF=NON_SYNONYMOUS_CODING(MODERATE|MISSENSE|gCa/gTa|A726V|760|FAP||CODING|NM_004460.2|25|1);FS=1.844;HaplotypeScore=17.7891;MLEAC=1;MLEAF=0.500;MQ=59.87;MQ0=0;MQRankSum=-1.301;QD=13.54;ReadPosRankSum=0.945	chr2.163027199-163100045 ; 2q24.2 ; loss
FAT1	FAT tumor suppressor homolog 1 (Drosophila)	0.138889	AC=1;AF=0.500;AN=2;BaseQRankSum=-2.321;DP=500;Dels=0.00;EFF=NON_SYNONYMOUS_CODING(MODERATE|MISSENSE|gGg/gCg|G798A|4588|FAT1||CODING|NM_005245.3|2|1);FS=7.259;HaplotypeScore=11.6996;MLEAC=1;MLEAF=0.500;MQ=60.00;MQ0=0;MQRankSum=-1.202;QD=13.62;ReadPosRankSum=0.891	chr4.187508936-187644987 ; 4q35.2 ; gain
FAT2	FAT tumor suppressor homolog 2 (Drosophila)	0.138889	AC=2;AF=1.00;AN=2;BaseQRankSum=2.370;DB;DP=500;Dels=0.00;EFF=NON_SYNONYMOUS_CODING(MODERATE|MISSENSE|Ggc/Agc|G1515S|4349|FAT2||CODING|NM_001447.2|7|1);FS=2.366;HaplotypeScore=10.0419;MLEAC=2;MLEAF=1.00;MQ=59.94;MQ0=0;MQRankSum=0.221;QD=32.52;ReadPosRankSum=-0.881 , AC=2;AF=1.00;AN=2;BaseQRankSum=0.446;DB;DP=476;Dels=0.00;EFF=NON_SYNONYMOUS_CODING(MODERATE|MISSENSE|Gtg/Atg|V1462M|4349|FAT2||CODING…	chr5.150883652-150948505 ; 5q33.1 ; loss
FBLN2	fibulin 2	0.0555556	AC=1;AF=0.500;AN=2;BaseQRankSum=1.285;DP=311;Dels=0.00;EFF=NON_SYNONYMOUS_CODING(MODERATE|MISSENSE|Gtg/Atg|V373M|1184|FBLN2||CODING|NM_001998.2|2|1),NON_SYNONYMOUS_CODING(MODERATE|MISSENSE|Gtg/Atg|V373M|1231|FBLN2||CODING|NM_001004019.1|2|1),NON_SYNONYMOUS_CODING(MODERATE|MISSENSE|Gtg/Atg|V373M|1231|FBLN2||CODING|NM_001165035.1|2|1);FS=8.603;HaplotypeScore=4.1709;MLEAC=1;MLEAF=0.500;MQ=60.00;MQ0=…	chr3.13590624-13679922 ; 3p25.1 ; gain
FBN3	fibrillin 3	0.305556	AC=2;AF=1.00;AN=2;BaseQRankSum=1.835;DB;DP=127;Dels=0.00;EFF=NON_SYNONYMOUS_CODING(MODERATE|MISSENSE|cCg/cTg|P329L|2809|FBN3||CODING|NM_032447.3|8|1);FS=7.267;HaplotypeScore=1.7853;MLEAC=2;MLEAF=1.00;MQ=60.00;MQ0=0;MQRankSum=0.069;QD=30.88;ReadPosRankSum=-0.288	chr19.8130286-8212385 ; 19p13.2 ; loss
FBXO36	F-box protein 36	0.388889	AC=1;AF=0.500;AN=2;BaseQRankSum=-6.804;DB;DP=500;Dels=0.00;EFF=NON_SYNONYMOUS_CODING(MODERATE|MISSENSE|ttG/ttT|L86F|188|FBXO36||CODING|NM_174899.4|3|1);FS=5.294;HaplotypeScore=1.5983;MLEAC=1;MLEAF=0.500;MQ=51.40;MQ0=0;MQRankSum=4.063;QD=6.12;ReadPosRankSum=1.467	chr2.230787206-230877825 ; 2q36.3 ; gain
FBXO38	F-box protein 38	0.277778	AC=1;AF=0.500;AN=2;BaseQRankSum=2.297;DB;DP=500;Dels=0.00;EFF=NON_SYNONYMOUS_CODING(MODERATE|MISSENSE|Tca/Cca|S592P|1113|FBXO38||CODING|NM_030793.4|14|1),NON_SYNONYMOUS_CODING(MODERATE|MISSENSE|Tca/Cca|S592P|943|FBXO38||CODING|NM_001271723.1|14|1);FS=21.101;HaplotypeScore=2.8279;MLEAC=1;MLEAF=0.500;MQ=59.94;MQ0=1;MQRankSum=-0.673;QD=9.62;ReadPosRankSum=-0.834	chr5.147763497-147822399 ; 5q32 ; loss
FCHO2	FCH domain only 2	0.0555556	AC=1;AF=0.500;AN=2;BaseQRankSum=0.951;DP=500;Dels=0.00;EFF=NON_SYNONYMOUS_CODING(MODERATE|MISSENSE|aAc/aTc|N598I|777|FCHO2||CODING|NM_001146032.1|21|1),NON_SYNONYMOUS_CODING(MODERATE|MISSENSE|aAc/aTc|N631I|810|FCHO2||CODING|NM_138782.2|22|1);FS=3.827;HaplotypeScore=3.8171;MLEAC=1;MLEAF=0.500;MQ=60.00;MQ0=0;MQRankSum=-0.074;QD=12.95;ReadPosRankSum=0.640	chr5.72251807-72386349 ; 5q13.2 ; gain
FCHSD2	FCH and double SH3 domains 2	0.0555556	NA	chr11.72547789-72853143 ; 11q13.4 ; gain
FCRL2	Fc receptor-like 2	0.111111	AC=2;AF=1.00;AN=2;BaseQRankSum=-5.563;DP=500;Dels=0.00;EFF=NON_SYNONYMOUS_CODING(MODERATE|MISSENSE|caG/caT|Q163H|508|FCRL2||CODING|NM_030764.3|4|1);FS=2.269;HaplotypeScore=5.5091;MLEAC=2;MLEAF=1.00;MQ=59.95;MQ0=0;MQRankSum=1.069;QD=30.51;ReadPosRankSum=-2.081	chr1.157715522-157746922 ; 1q23.1 ; gain
FCRL5	Fc receptor-like 5	0.111111	AC=1;AF=0.500;AN=2;BaseQRankSum=7.371;DP=493;Dels=0.00;EFF=NON_SYNONYMOUS_CODING(MODERATE|MISSENSE|Act/Gct|T718A|977|FCRL5||CODING|NM_031281.2|10|1),NON_SYNONYMOUS_CODING(MODERATE|MISSENSE|Act/Gct|T718A|998|FCRL5||CODING|NM_001195388.1|10|1);FS=1.149;HaplotypeScore=3.7905;MLEAC=1;MLEAF=0.500;MQ=60.00;MQ0=0;MQRankSum=-0.675;QD=21.94;ReadPosRankSum=-2.212	chr1.157483166-157522310 ; 1q23.1 ; gain
FFAR3	free fatty acid receptor 3	0.388889	AC=1;AF=0.500;AN=2;BaseQRankSum=-5.055;DB;DP=500;Dels=0.00;EFF=NON_SYNONYMOUS_CODING(MODERATE|MISSENSE|cGc/cAc|R45H|346|FFAR3||CODING|NM_005304.3|2|1);FS=2.171;HaplotypeScore=3.5870;MLEAC=1;MLEAF=0.500;MQ=44.68;MQ0=33;MQRankSum=1.963;QD=4.10;ReadPosRankSum=2.861	chr19.35849487-35851389 ; 19q13.12 ; gain
FGA	fibrinogen alpha chain	0.166667	AC=1;AF=0.500;AN=2;BaseQRankSum=-1.863;DP=500;Dels=0.00;EFF=DOWNSTREAM(MODIFIER||||644|FGA||CODING|NM_021871.2||1),NON_SYNONYMOUS_CODING(MODERATE|MISSENSE|Tgg/Agg|W708R|866|FGA||CODING|NM_000508.3|6|1);FS=0.341;HaplotypeScore=5.8367;MLEAC=1;MLEAF=0.500;MQ=60.00;MQ0=0;MQRankSum=0.200;QD=10.86;ReadPosRankSum=0.748 , AC=1;AF=0.500;AN=2;BaseQRankSum=5.812;DP=500;Dels=0.00;EFF=DOWNSTREAM(MODIFIER||||6…	chr4.155504279-155511897 ; 4q31.3 ; loss
FGL1	fibrinogen-like 1	0.111111	NA	chr8.17721899-17753047 ; 8p22 ; gain
FHL2	four and a half LIM domains 2	0.0555556	AC=1;AF=0.500;AN=2;BaseQRankSum=2.581;DP=500;Dels=0.00;EFF=NON_SYNONYMOUS_CODING(MODERATE|MISSENSE|aAg/aTg|K167M|279|FHL2||CODING|NM_001039492.2|5|1),NON_SYNONYMOUS_CODING(MODERATE|MISSENSE|aAg/aTg|K167M|279|FHL2||CODING|NM_001450.3|4|1),NON_SYNONYMOUS_CODING(MODERATE|MISSENSE|aAg/aTg|K167M|279|FHL2||CODING|NM_201555.1|6|1),NON_SYNONYMOUS_CODING(MODERATE|MISSENSE|aAg/aTg|K167M|279|FHL2||CODING|NM…	chr2.105977282-106055230 ; 2q12.1 ; gain
FILIP1	filamin A interacting protein 1	0.0555556	AC=1;AF=0.500;AN=2;BaseQRankSum=-10.088;DP=500;Dels=0.00;EFF=NON_SYNONYMOUS_CODING(MODERATE|MISSENSE|atG/atT|M165I|1213|FILIP1||CODING|NM_015687.2|4|1);FS=2.171;HaplotypeScore=3.8593;MLEAC=1;MLEAF=0.500;MQ=60.00;MQ0=0;MQRankSum=-0.188;QD=21.87;ReadPosRankSum=0.011	chr6.76017799-76203496 ; 6q14.1 ; gain
FLI1	Friend leukemia virus integration 1	0.0555556	AC=1;AF=0.500;AN=2;BaseQRankSum=2.993;DP=500;Dels=0.00;EFF=INTRON(MODIFIER||||259|FLI1||CODING|NM_001271012.1|2|1),NON_SYNONYMOUS_CODING(MODERATE|MISSENSE|Gac/Cac|D122H|419|FLI1||CODING|NM_001167681.2|5|1),NON_SYNONYMOUS_CODING(MODERATE|MISSENSE|Gac/Cac|D155H|452|FLI1||CODING|NM_002017.4|4|1),NON_SYNONYMOUS_CODING(MODERATE|MISSENSE|Gac/Cac|D89H|386|FLI1||CODING|NM_001271010.1|5|1);FS=1.351;Haplot…	chr11.128556429-128683162 ; 11q24.3 ; gain
FLII	flightless I homolog (Drosophila)	0.0555556	NA	chr17.18148130-18162230 ; 17p11.2 ; gain
FLNC	filamin C, gamma (actin binding protein 280)	0.0555556	AC=1;AF=0.500;AN=2;BaseQRankSum=7.343;DP=500;Dels=0.00;EFF=NON_SYNONYMOUS_CODING(MODERATE|MISSENSE|caC/caA|H2085Q|2692|FLNC||CODING|NM_001127487.1|37|1),NON_SYNONYMOUS_CODING(MODERATE|MISSENSE|caC/caA|H2118Q|2725|FLNC||CODING|NM_001458.4|38|1);FS=6.604;HaplotypeScore=5.7326;MLEAC=1;MLEAF=0.500;MQ=59.99;MQ0=0;MQRankSum=-1.589;QD=5.08;ReadPosRankSum=-0.112	chr7.128470482-128499328 ; 7q32.1 ; gain
FMO3	flavin containing monooxygenase 3	0.0555556	AC=1;AF=0.500;AN=2;BaseQRankSum=-6.990;DP=500;Dels=0.00;EFF=NON_SYNONYMOUS_CODING(MODERATE|MISSENSE|gGa/gAa|G240E|532|FMO3||CODING|NM_001002294.2|6|1),NON_SYNONYMOUS_CODING(MODERATE|MISSENSE|gGa/gAa|G240E|532|FMO3||CODING|NM_006894.5|6|1);FS=6.893;HaplotypeScore=5.8547;MLEAC=1;MLEAF=0.500;MQ=60.00;MQ0=0;MQRankSum=-0.065;QD=13.28;ReadPosRankSum=0.634 , AC=1;AF=0.500;AN=2;BaseQRankSum=0.639;DP=500;…	chr1.171060017-171086959 ; 1q24.3 ; gain
FOLR1	folate receptor 1 (adult)	0.0555556	AC=1;AF=0.500;AN=2;BaseQRankSum=8.139;DB;DP=500;Dels=0.00;EFF=NON_SYNONYMOUS_CODING(MODERATE|MISSENSE|Cgg/Tgg|R98W|257|FOLR1||CODING|NM_000802.3|3|1),NON_SYNONYMOUS_CODING(MODERATE|MISSENSE|Cgg/Tgg|R98W|257|FOLR1||CODING|NM_016724.2|4|1),NON_SYNONYMOUS_CODING(MODERATE|MISSENSE|Cgg/Tgg|R98W|257|FOLR1||CODING|NM_016725.2|3|1),NON_SYNONYMOUS_CODING(MODERATE|MISSENSE|Cgg/Tgg|R98W|257|FOLR1||CODING|NM…	chr11.71900601-71907367 ; 11q13.4 ; gain
FRS2	fibroblast growth factor receptor substrate 2	0.222222	NA	chr12.69864128-69973562 ; 12q15 ; gain
FSCB	fibrous sheath CABYR binding protein	0.166667	AC=1;AF=0.500;AN=2;BaseQRankSum=3.721;DB;DP=500;Dels=0.00;EFF=NON_SYNONYMOUS_CODING(MODERATE|MISSENSE|cTt/cCt|L380P|825|FSCB||CODING|NM_032135.3|1|1);FS=0.000;HaplotypeScore=7.2792;MLEAC=1;MLEAF=0.500;MQ=59.95;MQ0=0;MQRankSum=1.611;QD=12.79;ReadPosRankSum=1.341 , AC=1;AF=0.500;AN=2;BaseQRankSum=-7.190;DB;DP=500;Dels=0.00;EFF=NON_SYNONYMOUS_CODING(MODERATE|MISSENSE|caC/caA|H195Q|825|FSCB||CODING|N…	chr14.44973353-44976499 ; 14q21.2 ; gain
FUBP1	far upstream element (FUSE) binding protein 1	0.0555556	AC=1;AF=0.500;AN=2;BaseQRankSum=9.838;DP=500;Dels=0.00;EFF=NON_SYNONYMOUS_CODING(MODERATE|MISSENSE|aTa/aGa|I402R|644|FUBP1||CODING|NM_003902.3|14|1);FS=14.715;HaplotypeScore=11.8485;MLEAC=1;MLEAF=0.500;MQ=59.99;MQ0=0;MQRankSum=-1.298;QD=7.13;ReadPosRankSum=-0.437	chr1.78413590-78444777 ; 1p31.1 ; gain
FZD10	frizzled homolog 10 (Drosophila)	0.138889	AC=1;AF=0.500;AN=2;BaseQRankSum=-12.542;DP=500;Dels=0.00;EFF=NON_SYNONYMOUS_CODING(MODERATE|MISSENSE|ttC/ttA|F421L|581|FZD10||CODING|NM_007197.3|1|1),UPSTREAM(MODIFIER|||||FLJ31485||NON_CODING|NR_033834.1||1);FS=4.358;HaplotypeScore=13.0372;MLEAC=1;MLEAF=0.500;MQ=59.94;MQ0=0;MQRankSum=-0.051;QD=6.08;ReadPosRankSum=0.273	chr12.130647003-130650285 ; 12q24.33 ; gain
G6PC2	glucose-6-phosphatase, catalytic, 2	0.111111	AC=1;AF=0.500;AN=2;BaseQRankSum=-1.561;DB;DP=498;Dels=0.00;EFF=NON_SYNONYMOUS_CODING(MODERATE|MISSENSE|tCt/tGt|S342C|355|G6PC2||CODING|NM_021176.2|5|1),UTR_3_PRIME(MODIFIER||||154|G6PC2||CODING|NM_001081686.1|4|1);FS=0.403;HaplotypeScore=2.8256;MLEAC=1;MLEAF=0.500;MQ=60.00;MQ0=0;MQRankSum=1.041;QD=3.26;ReadPosRankSum=-0.037	chr2.169757749-169766510 ; 2q31.1 ; loss
GAB4	GRB2-associated binding protein family, member 4	0.0555556	AC=1;AF=0.500;AN=2;BaseQRankSum=6.513;DP=301;Dels=0.00;EFF=NON_SYNONYMOUS_CODING(MODERATE|MISSENSE|Cgc/Agc|R216S|574|GAB4||CODING|NM_001037814.1|3|1);FS=1.551;HaplotypeScore=5.7540;MLEAC=1;MLEAF=0.500;MQ=60.00;MQ0=0;MQRankSum=-0.968;QD=16.34;ReadPosRankSum=-0.679	chr22.17442826-17489112 ; 22q11.1 ; loss
GAD2	glutamate decarboxylase 2 (pancreatic islets and brain, 65kDa)	0.111111	AC=1;AF=0.500;AN=2;BaseQRankSum=-10.414;DP=499;Dels=0.00;EFF=NON_SYNONYMOUS_CODING(MODERATE|MISSENSE|gCc/gAc|A28D|585|GAD2||CODING|NM_000818.2|2|1),NON_SYNONYMOUS_CODING(MODERATE|MISSENSE|gCc/gAc|A28D|585|GAD2||CODING|NM_001134366.1|2|1);FS=3.379;HaplotypeScore=16.2777;MLEAC=1;MLEAF=0.500;MQ=59.86;MQ0=1;MQRankSum=-1.142;QD=11.58;ReadPosRankSum=-0.482	chr10.26505235-26593491 ; 10p12.1 ; gain
GALNTL6	UDP-N-acetyl-alpha-D-galactosamine:polypeptide N-acetylgalactosaminyltransferase-like 6	0.0833333	AC=1;AF=0.500;AN=2;BaseQRankSum=-4.058;DP=500;Dels=0.00;EFF=NON_SYNONYMOUS_CODING(MODERATE|MISSENSE|cCc/cAc|P563H|601|GALNTL6||CODING|NM_001034845.2|13|1);FS=2.641;HaplotypeScore=7.9949;MLEAC=1;MLEAF=0.500;MQ=60.00;MQ0=0;MQRankSum=-0.706;QD=5.24;ReadPosRankSum=0.769	chr4.172734574-173961558 ; 4q34.1 ; gain
GAP43	growth associated protein 43	0.0833333	AC=1;AF=0.500;AN=2;BaseQRankSum=0.836;DP=500;Dels=0.00;EFF=NON_SYNONYMOUS_CODING(MODERATE|MISSENSE|gGg/gAg|G114E|238|GAP43||CODING|NM_002045.3|2|1),NON_SYNONYMOUS_CODING(MODERATE|MISSENSE|gGg/gAg|G150E|274|GAP43||CODING|NM_001130064.1|3|1);FS=8.339;HaplotypeScore=6.6503;MLEAC=1;MLEAF=0.500;MQ=60.00;MQ0=0;MQRankSum=-0.049;QD=12.20;ReadPosRankSum=0.042	chr3.115342150-115440334 ; 3q13.31 ; gain
GATA3	GATA binding protein 3	0.0833333	AC=1;AF=0.500;AN=2;BaseQRankSum=-8.136;DP=500;Dels=0.00;EFF=NON_SYNONYMOUS_CODING(MODERATE|MISSENSE|cCc/cAc|P227H|443|GATA3||CODING|NM_002051.2|3|1),NON_SYNONYMOUS_CODING(MODERATE|MISSENSE|cCc/cAc|P227H|444|GATA3||CODING|NM_001002295.1|3|1);FS=8.524;HaplotypeScore=5.9338;MLEAC=1;MLEAF=0.500;MQ=60.00;MQ0=0;MQRankSum=1.270;QD=11.38;ReadPosRankSum=-1.302	chr10.8096666-8117164 ; 10p14 ; gain
GATA6	GATA binding protein 6	0.0833333	AC=1;AF=0.500;AN=2;BaseQRankSum=-0.079;DP=500;Dels=0.00;EFF=NON_SYNONYMOUS_CODING(MODERATE|MISSENSE|Agc/Tgc|S137C|595|GATA6||CODING|NM_005257.4|2|1);FS=20.375;HaplotypeScore=3.8104;MLEAC=1;MLEAF=0.500;MQ=60.00;MQ0=0;MQRankSum=-0.040;QD=14.68;ReadPosRankSum=1.015	chr18.19749403-19782491 ; 18q11.2 ; gain
GBE1	glucan (1,4-alpha-), branching enzyme 1	0.166667	NA	chr3.81538849-81810950 ; 3p12.2 ; gain
GBP4	guanylate binding protein 4	0.333333	AC=2;AF=1.00;AN=2;BaseQRankSum=2.498;DB;DP=500;Dels=0.00;EFF=NON_SYNONYMOUS_CODING(MODERATE|MISSENSE|gAg/gGg|E551G|640|GBP4||CODING|NM_052941.4|10|1);FS=0.000;HaplotypeScore=5.5270;MLEAC=2;MLEAF=1.00;MQ=47.44;MQ0=2;MQRankSum=-1.949;QD=28.12;ReadPosRankSum=1.617 , AC=2;AF=1.00;AN=2;BaseQRankSum=1.643;DB;DP=494;Dels=0.00;EFF=NON_SYNONYMOUS_CODING(MODERATE|MISSENSE|Ttg/Atg|L549M|640|GBP4||CODING|NM_…	chr1.89646830-89664633 ; 1p22.2 ; loss
GDAP1	ganglioside-induced differentiation-associated protein 1	0.0833333	AC=1;AF=0.500;AN=2;BaseQRankSum=-11.532;DP=500;Dels=0.00;EFF=EXON(MODIFIER|||||GDAP1||CODING|NR_046346.1|6|1),NON_SYNONYMOUS_CODING(MODERATE|MISSENSE|gCa/gTa|A262V|290|GDAP1||CODING|NM_001040875.2|6|1),NON_SYNONYMOUS_CODING(MODERATE|MISSENSE|gCa/gTa|A330V|358|GDAP1||CODING|NM_018972.2|6|1);FS=5.077;HaplotypeScore=10.4150;MLEAC=1;MLEAF=0.500;MQ=60.00;MQ0=0;MQRankSum=0.069;QD=2.72;ReadPosRankSum=-0…	chr8.75262617-75279335 ; 8q21.11 ; gain
GDF5	growth differentiation factor 5	0.0833333	AC=1;AF=0.500;AN=2;BaseQRankSum=12.279;DP=500;Dels=0.00;EFF=NON_SYNONYMOUS_CODING(MODERATE|MISSENSE|cGg/cAg|R120Q|501|GDF5||CODING|NM_000557.2|1|1);FS=9.841;HaplotypeScore=7.2844;MLEAC=1;MLEAF=0.500;MQ=60.00;MQ0=0;MQRankSum=-1.484;QD=13.12;ReadPosRankSum=2.117	chr20.34021148-34026027 ; 20q11.22 ; gain
GHR	growth hormone receptor	0.0833333	AC=1;AF=0.500;AN=2;BaseQRankSum=-3.797;DP=500;Dels=0.00;EFF=NON_SYNONYMOUS_CODING(MODERATE|MISSENSE|Gtg/Atg|V300M|616|GHR||CODING|NM_001242460.1|8|1),NON_SYNONYMOUS_CODING(MODERATE|MISSENSE|Gtg/Atg|V322M|638|GHR||CODING|NM_000163.4|10|1),NON_SYNONYMOUS_CODING(MODERATE|MISSENSE|Gtg/Atg|V322M|638|GHR||CODING|NM_001242400.2|11|1),NON_SYNONYMOUS_CODING(MODERATE|MISSENSE|Gtg/Atg|V322M|638|GHR||CODING|…	chr5.42423876-42721980 ; 5p13.1 ; gain
GIMAP6	GTPase, IMAP family member 6	0.25	AC=1;AF=0.500;AN=2;BaseQRankSum=12.141;DB;DP=500;Dels=0.00;EFF=NON_SYNONYMOUS_CODING(MODERATE|MISSENSE|Ggc/Agc|G171S|292|GIMAP6||CODING|NM_024711.5|3|1),NON_SYNONYMOUS_CODING(MODERATE|MISSENSE|Ggc/Agc|G241S|362|GIMAP6||CODING|NM_001244072.1|3|1),UTR_3_PRIME(MODIFIER||||62|GIMAP6||CODING|NM_001244071.1|3|1);FS=2.364;HaplotypeScore=9.8701;MLEAC=1;MLEAF=0.500;MQ=60.00;MQ0=0;MQRankSum=1.388;QD=14.28;…	chr7.150322463-150329736 ; 7q36.1 ; loss
GJA10	gap junction protein, alpha 10, 62kDa	0.0555556	AC=1;AF=0.500;AN=2;BaseQRankSum=-2.282;DP=500;Dels=0.00;EFF=NON_SYNONYMOUS_CODING(MODERATE|MISSENSE|Tgc/Agc|C61S|543|GJA10||CODING|NM_032602.1|1|1);FS=0.325;HaplotypeScore=9.5439;MLEAC=1;MLEAF=0.500;MQ=60.00;MQ0=0;MQRankSum=-1.011;QD=13.62;ReadPosRankSum=-0.855	chr6.90604187-90605819 ; 6q15 ; gain
GLIS2	GLIS family zinc finger 2	0.0833333	AC=1;AF=0.500;AN=2;BaseQRankSum=-2.924;DP=483;Dels=0.00;EFF=NON_SYNONYMOUS_CODING(MODERATE|MISSENSE|Ggt/Agt|G215S|524|GLIS2||CODING|NM_032575.2|4|1);FS=0.000;HaplotypeScore=7.8363;MLEAC=1;MLEAF=0.500;MQ=60.04;MQ0=0;MQRankSum=-0.822;QD=11.95;ReadPosRankSum=0.041	chr16.4382224-4389598 ; 16p13.3 ; gain
GLYATL2	glycine-N-acyltransferase-like 2	0.138889	AC=2;AF=1.00;AN=2;BaseQRankSum=2.281;DB;DP=500;Dels=0.00;EFF=NON_SYNONYMOUS_CODING(MODERATE|MISSENSE|Gaa/Aaa|E160K|294|GLYATL2||CODING|NM_145016.3|6|1);FS=0.000;HaplotypeScore=7.8643;MLEAC=2;MLEAF=1.00;MQ=60.00;MQ0=0;MQRankSum=0.363;QD=34.20;ReadPosRankSum=0.398	chr11.58601539-58611997 ; 11q12.1 ; loss
GNAS	GNAS complex locus	0.0833333	AC=1;AF=0.500;AN=2;BaseQRankSum=6.673;DP=500;Dels=0.00;EFF=INTRON(MODIFIER||||245|GNAS||CODING|NM_016592.2|1|1),NON_SYNONYMOUS_CODING(MODERATE|MISSENSE|Gcc/Ccc|A280P|1037|GNAS||CODING|NM_080425.2|1|1),SYNONYMOUS_CODING(LOW|SILENT|gcG/gcC|A217|626|GNAS||CODING|NM_001077490.1|1|1),UPSTREAM(MODIFIER|||||GNAS-AS1||NON_CODING|NR_002785.2||1);FS=3.409;HaplotypeScore=5.5388;MLEAC=1;MLEAF=0.500;MQ=60.00;…	chr20.57414794-57486250 ; 20q13.32 ; gain
GNAT3	guanine nucleotide binding protein, alpha transducing 3	0.0555556	NA	chr7.80087986-80141242 ; 7q21.11 ; loss
GNMT	glycine N-methyltransferase	0.0555556	AC=1;AF=0.500;AN=2;BaseQRankSum=-7.782;DP=500;Dels=0.00;EFF=DOWNSTREAM(MODIFIER||||295|GNMT||CODING|NM_018960.4||1),NON_SYNONYMOUS_CODING(MODERATE|MISSENSE|tCt/tTt|S807F|980|PEX6||CODING|NM_000287.3|13|1);FS=2.333;HaplotypeScore=8.2824;MLEAC=1;MLEAF=0.500;MQ=60.00;MQ0=0;MQRankSum=0.715;QD=4.24;ReadPosRankSum=0.616	chr6.42928499-42931618 ; 6p21.1 ; gain
GOLGB1	golgin B1, golgi integral membrane protein	0.0555556	AC=1;AF=0.500;AN=2;BaseQRankSum=-3.950;DP=500;Dels=0.00;EFF=NON_SYNONYMOUS_CODING(MODERATE|MISSENSE|cCa/cTa|P1211L|3184|GOLGB1||CODING|NM_001256488.1|12|1),NON_SYNONYMOUS_CODING(MODERATE|MISSENSE|cCa/cTa|P1252L|3225|GOLGB1||CODING|NM_001256487.1|13|1),NON_SYNONYMOUS_CODING(MODERATE|MISSENSE|cCa/cTa|P1286L|3259|GOLGB1||CODING|NM_004487.4|13|1),NON_SYNONYMOUS_CODING(MODERATE|MISSENSE|cCa/cTa|P1291L…	chr3.121382045-121468614 ; 3q13.33 ; gain
GPA33	glycoprotein A33 (transmembrane)	0.111111	AC=1;AF=0.500;AN=2;BaseQRankSum=10.171;DB;DP=500;Dels=0.00;EFF=NON_SYNONYMOUS_CODING(MODERATE|MISSENSE|cCg/cTg|P27L|319|GPA33||CODING|NM_005814.1|2|1);FS=8.645;HaplotypeScore=9.5572;MLEAC=1;MLEAF=0.500;MQ=60.02;MQ0=0;MQRankSum=1.421;QD=6.75;ReadPosRankSum=-0.267	chr1.167022081-167059868 ; 1q24.1 ; gain
GPD1L	glycerol-3-phosphate dehydrogenase 1-like	0.0555556	AC=1;AF=0.500;AN=2;BaseQRankSum=-8.309;DP=500;Dels=0.00;EFF=NON_SYNONYMOUS_CODING(MODERATE|MISSENSE|aCt/aTt|T325I|351|GPD1L||CODING|NM_015141.3|8|1);FS=7.133;HaplotypeScore=2.7345;MLEAC=1;MLEAF=0.500;MQ=60.00;MQ0=0;MQRankSum=-0.037;QD=13.01;ReadPosRankSum=-0.917	chr3.32148002-32210207 ; 3p22.3 ; gain
GPR125	G protein-coupled receptor 125	0.305556	AC=1;AF=0.500;AN=2;BaseQRankSum=11.880;DB;DP=500;Dels=0.00;EFF=NON_SYNONYMOUS_CODING(MODERATE|MISSENSE|Gtg/Atg|V1043M|1321|GPR125||CODING|NM_145290.3|19|1);FS=0.000;HaplotypeScore=3.9237;MLEAC=1;MLEAF=0.500;MQ=59.95;MQ0=0;MQRankSum=-1.075;QD=13.42;ReadPosRankSum=2.961	chr4.22388996-22517677 ; 4p15.2 ; loss
GPR128	G protein-coupled receptor 128	0.111111	AC=1;AF=0.500;AN=2;BaseQRankSum=-1.470;DP=497;Dels=0.00;EFF=NON_SYNONYMOUS_CODING(MODERATE|MISSENSE|atG/atT|M365I|797|GPR128||CODING|NM_032787.2|9|1);FS=0.809;HaplotypeScore=4.6703;MLEAC=1;MLEAF=0.500;MQ=60.00;MQ0=0;MQRankSum=-0.693;QD=6.79;ReadPosRankSum=1.716 , AC=1;AF=0.500;AN=2;BaseQRankSum=-2.761;DP=497;Dels=0.00;EFF=NON_SYNONYMOUS_CODING(MODERATE|MISSENSE|Gtc/Ttc|V366F|797|GPR128||CODING|NM…	chr3.100328432-100414323 ; 3q12.2 ; gain
GPR15	G protein-coupled receptor 15	0.111111	AC=1;AF=0.500;AN=2;BaseQRankSum=1.489;DP=500;Dels=0.00;EFF=NON_SYNONYMOUS_CODING(MODERATE|MISSENSE|Gtg/Ctg|V358L|360|GPR15||CODING|NM_005290.2|1|1);FS=3.054;HaplotypeScore=7.5870;MLEAC=1;MLEAF=0.500;MQ=59.96;MQ0=0;MQRankSum=-1.251;QD=9.52;ReadPosRankSum=-3.280	chr3.98250742-98251994 ; 3q11.2 ; gain
GPR161	G protein-coupled receptor 161	0.111111	AC=1;AF=0.500;AN=2;BaseQRankSum=1.974;DP=500;Dels=0.00;EFF=NON_SYNONYMOUS_CODING(MODERATE|MISSENSE|Ccc/Tcc|P189S|397|GPR161||CODING|NM_001267612.1|3|1),NON_SYNONYMOUS_CODING(MODERATE|MISSENSE|Ccc/Tcc|P207S|415|GPR161||CODING|NM_001267614.1|2|1),NON_SYNONYMOUS_CODING(MODERATE|MISSENSE|Ccc/Tcc|P243S|451|GPR161||CODING|NM_001267613.1|2|1),NON_SYNONYMOUS_CODING(MODERATE|MISSENSE|Ccc/Tcc|P321S|529|GPR…	chr1.168048779-168106905 ; 1q24.2 ; gain
GREB1	GREB1 protein	0.111111	AC=1;AF=0.500;AN=2;BaseQRankSum=4.404;DP=500;Dels=0.00;EFF=NON_SYNONYMOUS_CODING(MODERATE|MISSENSE|Tac/Aac|Y1466N|1949|GREB1||CODING|NM_014668.3|25|1);FS=1.289;HaplotypeScore=13.2401;MLEAC=1;MLEAF=0.500;MQ=59.96;MQ0=0;MQRankSum=0.139;QD=3.13;ReadPosRankSum=0.756	chr2.11674241-11782912 ; 2p25.1 ; gain
GRIK2	glutamate receptor, ionotropic, kainate 2	0.0555556	AC=2;AF=1.00;AN=2;BaseQRankSum=0.848;DP=500;Dels=0.00;EFF=NON_SYNONYMOUS_CODING(MODERATE|MISSENSE|cTc/cAc|L619H|869|GRIK2||CODING|NM_175768.3|12|1),NON_SYNONYMOUS_CODING(MODERATE|MISSENSE|cTc/cAc|L619H|892|GRIK2||CODING|NM_001166247.1|12|1),NON_SYNONYMOUS_CODING(MODERATE|MISSENSE|cTc/cAc|L619H|908|GRIK2||CODING|NM_021956.4|12|1);FS=22.632;HaplotypeScore=10.0678;MLEAC=2;MLEAF=1.00;MQ=59.84;MQ0=0;M…	chr6.101846860-102517958 ; 6q16.3 ; loss
GRM7	glutamate receptor, metabotropic 7	0.0833333	AC=1;AF=0.500;AN=2;BaseQRankSum=-4.959;DP=422;Dels=0.00;EFF=NON_SYNONYMOUS_CODING(MODERATE|MISSENSE|Cac/Tac|H424Y|915|GRM7||CODING|NM_000844.3|6|1),NON_SYNONYMOUS_CODING(MODERATE|MISSENSE|Cac/Tac|H424Y|922|GRM7||CODING|NM_181874.2|6|1);FS=6.327;HaplotypeScore=8.3949;MLEAC=1;MLEAF=0.500;MQ=60.00;MQ0=0;MQRankSum=-0.699;QD=11.62;ReadPosRankSum=0.483	chr3.6902801-7783218 ; 3p26.1 ; gain
GRM8	glutamate receptor, metabotropic 8	0.0555556	AC=1;AF=0.500;AN=2;BaseQRankSum=-1.174;DP=500;Dels=0.00;EFF=EXON(MODIFIER|||||GRM8||CODING|NR_028041.1|3|1),NON_SYNONYMOUS_CODING(MODERATE|MISSENSE|atC/atG|I266M|908|GRM8||CODING|NM_000845.2|3|1),NON_SYNONYMOUS_CODING(MODERATE|MISSENSE|atC/atG|I266M|908|GRM8||CODING|NM_001127323.1|4|1);FS=4.632;HaplotypeScore=7.4216;MLEAC=1;MLEAF=0.500;MQ=56.52;MQ0=0;MQRankSum=5.436;QD=13.57;ReadPosRankSum=-1.237	chr7.126078651-126892428 ; 7q31.33 ; loss
GTF2IRD1	GTF2I repeat domain containing 1	0.0555556	AC=1;AF=0.500;AN=2;BaseQRankSum=9.548;DP=500;Dels=0.00;EFF=NON_SYNONYMOUS_CODING(MODERATE|MISSENSE|Cgg/Tgg|R129W|944|GTF2IRD1||CODING|NM_005685.3|4|1),NON_SYNONYMOUS_CODING(MODERATE|MISSENSE|Cgg/Tgg|R129W|959|GTF2IRD1||CODING|NM_016328.2|4|1),NON_SYNONYMOUS_CODING(MODERATE|MISSENSE|Cgg/Tgg|R161W|976|GTF2IRD1||CODING|NM_001199207.1|4|1);FS=1.089;HaplotypeScore=6.3610;MLEAC=1;MLEAF=0.500;MQ=60.00;M…	chr7.73868119-74016920 ; 7q11.23 ; gain
GUK1	guanylate kinase 1	0.0555556	AC=1;AF=0.500;AN=2;BaseQRankSum=-13.518;DP=478;Dels=0.00;EFF=INTRON(MODIFIER||||241|GUK1||CODING|NM_001242840.1|6|1),NON_SYNONYMOUS_CODING(MODERATE|MISSENSE|gCa/gTa|A179V|197|GUK1||CODING|NM_000858.5|8|1),NON_SYNONYMOUS_CODING(MODERATE|MISSENSE|gCa/gTa|A179V|197|GUK1||CODING|NM_001159391.1|7|1),NON_SYNONYMOUS_CODING(MODERATE|MISSENSE|gCa/gTa|A179V|197|GUK1||CODING|NM_001242839.1|7|1),NON_SYNONYMO…	chr1.228327784-228336655 ; 1q42.13 ; gain
GZMB	granzyme B (granzyme 2, cytotoxic T-lymphocyte-associated serine esterase 1)	0.333333	AC=1;AF=0.500;AN=2;BaseQRankSum=3.457;DB;DP=500;Dels=0.00;EFF=NON_SYNONYMOUS_CODING(MODERATE|MISSENSE|Tac/Cac|Y247H|247|GZMB||CODING|NM_004131.4|5|1);FS=4.475;HaplotypeScore=3.9160;MLEAC=1;MLEAF=0.500;MQ=60.00;MQ0=0;MQRankSum=-0.032;QD=14.39;ReadPosRankSum=0.306	chr14.25100160-25103432 ; 14q12 ; gain
HAPLN1	hyaluronan and proteoglycan link protein 1	0.0555556	AC=2;AF=1.00;AN=2;BaseQRankSum=3.591;DP=500;Dels=0.00;EFF=NON_SYNONYMOUS_CODING(MODERATE|MISSENSE|tAt/tCt|Y345S|354|HAPLN1||CODING|NM_001884.3|5|1);FS=6.359;HaplotypeScore=10.3457;MLEAC=2;MLEAF=1.00;MQ=60.00;MQ0=0;MQRankSum=0.412;QD=33.80;ReadPosRankSum=0.116	chr5.82934016-83016896 ; 5q14.3 ; gain
HAVCR2	hepatitis A virus cellular receptor 2	0.0555556	AC=1;AF=0.500;AN=2;BaseQRankSum=-8.407;DP=500;Dels=0.00;EFF=NON_SYNONYMOUS_CODING(MODERATE|MISSENSE|Cta/Ata|L84I|301|HAVCR2||CODING|NM_032782.4|2|1);FS=1.174;HaplotypeScore=4.7253;MLEAC=1;MLEAF=0.500;MQ=60.00;MQ0=0;MQRankSum=-1.000;QD=9.42;ReadPosRankSum=-0.884	chr5.156512842-156536248 ; 5q33.3 ; gain
HEATR5A	HEAT repeat containing 5A	0.194444	AC=1;AF=0.500;AN=2;BaseQRankSum=8.379;DP=500;Dels=0.00;EFF=NON_SYNONYMOUS_CODING(MODERATE|MISSENSE|cGa/cAa|R289Q|2046|HEATR5A||CODING|NM_015473.3|7|1);FS=1.051;HaplotypeScore=6.8484;MLEAC=1;MLEAF=0.500;MQ=59.94;MQ0=1;MQRankSum=0.205;QD=12.92;ReadPosRankSum=1.241	chr14.31760993-31889788 ; 14q12 ; gain
HELLS	helicase, lymphoid-specific	0.0555556	AC=1;AF=0.500;AN=2;BaseQRankSum=-9.358;DP=500;Dels=0.00;EFF=NON_SYNONYMOUS_CODING(MODERATE|MISSENSE|Cca/Tca|P471S|838|HELLS||CODING|NM_018063.3|13|1);FS=1.850;HaplotypeScore=8.5645;MLEAC=1;MLEAF=0.500;MQ=60.00;MQ0=0;MQRankSum=-0.671;QD=13.28;ReadPosRankSum=-0.215	chr10.96305573-96361856 ; 10q23.33 ; gain
HEXDC	hexosaminidase (glycosyl hydrolase family 20, catalytic domain) containing	0.0833333	NA	chr17.80376251-80400516 ; 17q25.3 ; gain
HIPK2	homeodomain interacting protein kinase 2; similar to homeodomain interacting protein kinase 2	0.0555556	NA	chr7.139246315-139477693 ; 7q34 ; gain
HIST1H3F	histone cluster 1, H3j; histone cluster 1, H3i; histone cluster 1, H3h; histone cluster 1, H3g; histone cluster 1, H3f; histone cluster 1, H3e; histone cluster 1, H3d; histone cluster 1, H3c; histone cluster 1, H3b; histone cluster 1, H3a; histone cluster 1, H2ad; histone cluster 2, H3a; histone cluster 2, H3c; histone cluster 2, H3d	0.0833333	AC=1;AF=0.500;AN=2;BaseQRankSum=12.121;DP=500;Dels=0.00;EFF=NON_SYNONYMOUS_CODING(MODERATE|MISSENSE|Gag/Aag|E98K|136|HIST1H3F||CODING|NM_021018.2|1|1),UPSTREAM(MODIFIER||||126|HIST1H2BH||CODING|NM_003524.2||1),UPSTREAM(MODIFIER||||98|HIST1H4G||CODING|NM_003547.2||1);FS=5.706;HaplotypeScore=7.4985;MLEAC=1;MLEAF=0.500;MQ=60.00;MQ0=0;MQRankSum=0.623;QD=14.26;ReadPosRankSum=0.964	chr6.26250369-26250835 ; 6p22.2 ; gain
HPDL	4-hydroxyphenylpyruvate dioxygenase-like	0.0555556	AC=1;AF=0.500;AN=2;BaseQRankSum=7.298;DP=500;Dels=0.00;EFF=DOWNSTREAM(MODIFIER||||371|HPDL||CODING|NM_032756.2||1),NON_SYNONYMOUS_CODING(MODERATE|MISSENSE|cGg/cAg|R163Q|521|MUTYH||CODING|NM_001048173.1|7|1),NON_SYNONYMOUS_CODING(MODERATE|MISSENSE|cGg/cAg|R163Q|521|MUTYH||CODING|NM_001048174.1|7|1),NON_SYNONYMOUS_CODING(MODERATE|MISSENSE|cGg/cAg|R164Q|522|MUTYH||CODING|NM_001048172.1|7|1),NON_SYNO…	chr1.45792544-45794346 ; 1p34.1 ; gain
HTR1B	5-hydroxytryptamine (serotonin) receptor 1B	0.138889	AC=1;AF=0.500;AN=2;BaseQRankSum=6.133;DP=266;Dels=0.00;EFF=NON_SYNONYMOUS_CODING(MODERATE|MISSENSE|gTt/gCt|V274A|390|HTR1B||CODING|NM_000863.1|1|1);FS=5.478;HaplotypeScore=10.4400;MLEAC=1;MLEAF=0.500;MQ=60.00;MQ0=0;MQRankSum=-1.110;QD=1.86;ReadPosRankSum=-0.839	chr6.78171947-78173120 ; 6q14.1 ; gain
HTR1F	5-hydroxytryptamine (serotonin) receptor 1F	0.138889	AC=2;AF=1.00;AN=2;BaseQRankSum=-3.610;DP=500;Dels=0.00;EFF=NON_SYNONYMOUS_CODING(MODERATE|MISSENSE|tCa/tTa|S13L|366|HTR1F||CODING|NM_000866.3|2|1);FS=1.473;HaplotypeScore=11.2829;MLEAC=2;MLEAF=1.00;MQ=59.98;MQ0=0;MQRankSum=1.123;QD=32.86;ReadPosRankSum=0.506	chr3.88031725-88042919 ; 3p11.1 ; gain
HTR4	5-hydroxytryptamine (serotonin) receptor 4	0.138889	AC=1;AF=0.500;AN=2;BaseQRankSum=11.442;DB;DP=500;Dels=0.00;EFF=NON_SYNONYMOUS_CODING(MODERATE|MISSENSE|Gtt/Att|V362I|387|HTR4||CODING|NM_001040169.2|6|1),UTR_3_PRIME(MODIFIER||||378|HTR4||CODING|NM_199453.3|7|1);FS=8.603;HaplotypeScore=4.7682;MLEAC=1;MLEAF=0.500;MQ=59.93;MQ0=0;MQRankSum=-0.415;QD=9.23;ReadPosRankSum=-2.169	chr5.147830594-148033739 ; 5q32 ; loss
HTR6	5-hydroxytryptamine (serotonin) receptor 6	0.222222	AC=1;AF=0.500;AN=2;BaseQRankSum=-8.569;DP=500;Dels=0.00;EFF=NON_SYNONYMOUS_CODING(MODERATE|MISSENSE|Ctc/Atc|L68I|440|HTR6||CODING|NM_000871.1|1|1);FS=2.906;HaplotypeScore=11.1132;MLEAC=1;MLEAF=0.500;MQ=59.99;MQ0=0;MQRankSum=-1.235;QD=12.91;ReadPosRankSum=-0.409	chr1.19991779-20006055 ; 1p36.13 ; gain
HYAL1	hyaluronoglucosaminidase 1	0.111111	AC=2;AF=1.00;AN=2;BaseQRankSum=0.921;DP=253;Dels=0.00;EFF=EXON(MODIFIER|||||HYAL1||CODING|NR_047690.1|1|1),INTRON(MODIFIER||||176|HYAL1||CODING|NM_153285.2|1|1),INTRON(MODIFIER||||253|HYAL1||CODING|NM_153283.2|1|1),NON_SYNONYMOUS_CODING(MODERATE|MISSENSE|aTt/aGt|I103S|405|HYAL1||CODING|NM_153282.2|2|1),NON_SYNONYMOUS_CODING(MODERATE|MISSENSE|aTt/aGt|I103S|435|HYAL1||CODING|NM_033159.3|2|1),NON_SY…	chr3.50337319-50349812 ; 3p21.31 ; gain
HYOU1	hypoxia up-regulated 1	0.111111	AC=2;AF=1.00;AN=2;BaseQRankSum=-4.327;DP=500;Dels=0.00;EFF=NON_SYNONYMOUS_CODING(MODERATE|MISSENSE|Gca/Aca|A28T|999|HYOU1||CODING|NM_001130991.1|2|1),NON_SYNONYMOUS_CODING(MODERATE|MISSENSE|Gca/Aca|A28T|999|HYOU1||CODING|NM_006389.3|2|1);FS=5.661;HaplotypeScore=8.3071;MLEAC=2;MLEAF=1.00;MQ=60.00;MQ0=0;MQRankSum=0.192;QD=30.19;ReadPosRankSum=0.452	chr11.118914895-118927925 ; 11q23.3 ; gain
IFIT3	interferon-induced protein with tetratricopeptide repeats 3	0.0555556	AC=2;AF=1.00;AN=2;BaseQRankSum=0.890;DP=500;Dels=0.00;EFF=NON_SYNONYMOUS_CODING(MODERATE|MISSENSE|Ctt/Att|L367I|490|IFIT3||CODING|NM_001031683.2|2|1),NON_SYNONYMOUS_CODING(MODERATE|MISSENSE|Ctt/Att|L367I|490|IFIT3||CODING|NM_001549.4|2|1);FS=0.000;HaplotypeScore=8.1833;MLEAC=2;MLEAF=1.00;MQ=59.96;MQ0=0;MQRankSum=1.896;QD=33.47;ReadPosRankSum=-1.805	chr10.91087601-91100725 ; 10q23.31 ; gain
IFLTD1	intermediate filament tail domain containing 1	0.111111	AC=1;AF=0.500;AN=2;BaseQRankSum=-4.316;DP=500;Dels=0.00;EFF=NON_SYNONYMOUS_CODING(MODERATE|MISSENSE|Gat/Cat|D201H|291|IFLTD1||CODING|NM_001256266.1|7|1),NON_SYNONYMOUS_CODING(MODERATE|MISSENSE|Gat/Cat|D235H|325|IFLTD1||CODING|NM_001145727.2|5|1),NON_SYNONYMOUS_CODING(MODERATE|MISSENSE|Gat/Cat|D279H|369|IFLTD1||CODING|NM_001145729.1|6|1),NON_SYNONYMOUS_CODING(MODERATE|MISSENSE|Gat/Cat|D298H|388|IF…	chr12.25629015-25801496 ; 12p12.1 ; gain
IL26	interleukin 26	0.0555556	NA	chr12.68595128-68619571 ; 12q15 ; gain
IL32	interleukin 32	0.305556	AC=1;AF=0.500;AN=2;BaseQRankSum=11.165;DB;DP=500;Dels=0.00;EFF=NON_SYNONYMOUS_CODING(MODERATE|MISSENSE|gAc/gGc|D115G|131|IL32||CODING|NM_001012633.1|8|1),NON_SYNONYMOUS_CODING(MODERATE|MISSENSE|gAc/gGc|D152G|168|IL32||CODING|NM_001012634.1|6|1),NON_SYNONYMOUS_CODING(MODERATE|MISSENSE|gAc/gGc|D152G|168|IL32||CODING|NM_001012635.1|6|1),NON_SYNONYMOUS_CODING(MODERATE|MISSENSE|gAc/gGc|D163G|179|IL32|…	chr16.3115312-3119668 ; 16p13.3 ; gain
IMPG1	interphotoreceptor matrix proteoglycan 1	0.138889	AC=2;AF=1.00;AN=2;BaseQRankSum=-1.354;DP=379;Dels=0.00;EFF=NON_SYNONYMOUS_CODING(MODERATE|MISSENSE|gCt/gGt|A252G|797|IMPG1||CODING|NM_001563.2|7|1);FS=0.000;HaplotypeScore=10.9349;MLEAC=2;MLEAF=1.00;MQ=59.95;MQ0=0;MQRankSum=-1.060;QD=32.69;ReadPosRankSum=0.820	chr6.76631061-76782335 ; 6q14.1 ; gain
IMPG2	interphotoreceptor matrix proteoglycan 2	0.138889	AC=1;AF=0.500;AN=2;BaseQRankSum=-1.979;DP=500;Dels=0.00;EFF=NON_SYNONYMOUS_CODING(MODERATE|MISSENSE|Ttc/Atc|F536I|1241|IMPG2||CODING|NM_016247.3|13|1);FS=1.203;HaplotypeScore=7.2919;MLEAC=1;MLEAF=0.500;MQ=60.00;MQ0=0;MQRankSum=-1.150;QD=6.64;ReadPosRankSum=1.243	chr3.100941389-101039419 ; 3q12.3 ; gain
INPP4B	inositol polyphosphate-4-phosphatase, type II, 105kDa	0.194444	AC=1;AF=0.500;AN=2;BaseQRankSum=-6.924;DP=500;Dels=0.00;EFF=NON_SYNONYMOUS_CODING(MODERATE|MISSENSE|caG/caT|Q904H|924|INPP4B||CODING|NM_001101669.1|26|1),NON_SYNONYMOUS_CODING(MODERATE|MISSENSE|caG/caT|Q904H|924|INPP4B||CODING|NM_003866.2|27|1);FS=19.172;HaplotypeScore=5.4055;MLEAC=1;MLEAF=0.500;MQ=60.00;MQ0=0;MQRankSum=-2.116;QD=6.55;ReadPosRankSum=0.524	chr4.142949181-143767604 ; 4q31.21 ; loss
INTS4	integrator complex subunit 4	0.0555556	AC=1;AF=0.500;AN=2;BaseQRankSum=-10.677;DP=500;Dels=0.00;EFF=NON_SYNONYMOUS_CODING(MODERATE|MISSENSE|Gtt/Ttt|V298F|963|INTS4||CODING|NM_033547.3|8|1);FS=0.692;HaplotypeScore=3.7591;MLEAC=1;MLEAF=0.500;MQ=47.99;MQ0=0;MQRankSum=-0.849;QD=12.16;ReadPosRankSum=-1.719	chr11.77589765-77705717 ; 11q14.1 ; gain
IP6K2	inositol hexakisphosphate kinase 2	0.111111	AC=1;AF=0.500;AN=2;BaseQRankSum=-0.441;DP=208;Dels=0.00;EFF=EXON(MODIFIER|||||IP6K2||CODING|NR_027437.2|2|1),EXON(MODIFIER|||||IP6K2||CODING|NR_027438.2|2|1),NON_SYNONYMOUS_CODING(MODERATE|MISSENSE|aAa/aGa|K116R|185|IP6K2||CODING|NM_001190316.1|3|1),NON_SYNONYMOUS_CODING(MODERATE|MISSENSE|aAa/aGa|K119R|188|IP6K2||CODING|NM_001190317.1|3|1),NON_SYNONYMOUS_CODING(MODERATE|MISSENSE|aAa/aGa|K61R|426|…	chr3.48725435-48754711 ; 3p21.31 ; gain
IP6K3	inositol hexakisphosphate kinase 3	0.0555556	NA	chr6.33689442-33714762 ; 6p21.31 ; gain
IQCA1	IQ motif containing with AAA domain 1	0.0555556	AC=1;AF=0.500;AN=2;BaseQRankSum=9.064;DP=500;Dels=0.00;EFF=EXON(MODIFIER|||||IQCA1||CODING|NR_073043.1|2|1),NON_SYNONYMOUS_CODING(MODERATE|MISSENSE|tAc/tGc|Y60C|781|IQCA1||CODING|NM_001270584.1|2|1),NON_SYNONYMOUS_CODING(MODERATE|MISSENSE|tAc/tGc|Y60C|822|IQCA1||CODING|NM_024726.4|2|1),NON_SYNONYMOUS_CODING(MODERATE|MISSENSE|tAc/tGc|Y67C|830|IQCA1||CODING|NM_001270585.1|2|1);FS=0.716;HaplotypeSco…	chr2.237232789-237416178 ; 2q37.2 ; gain
IQCB1	IQ motif containing B1	0.0555556	AC=1;AF=0.500;AN=2;BaseQRankSum=-3.435;DP=500;Dels=0.00;EFF=NON_SYNONYMOUS_CODING(MODERATE|MISSENSE|atG/atC|M362I|465|IQCB1||CODING|NM_001023571.2|11|1),NON_SYNONYMOUS_CODING(MODERATE|MISSENSE|atG/atC|M495I|598|IQCB1||CODING|NM_001023570.2|14|1);FS=0.325;HaplotypeScore=8.9625;MLEAC=1;MLEAF=0.500;MQ=59.91;MQ0=0;MQRankSum=1.384;QD=12.76;ReadPosRankSum=-0.647	chr3.121488609-121553926 ; 3q13.33 ; gain
ITGA10	integrin, alpha 10	0.305556	AC=1;AF=0.500;AN=2;BaseQRankSum=8.919;DB;DP=500;Dels=0.00;EFF=NON_SYNONYMOUS_CODING(MODERATE|MISSENSE|cGg/cAg|R725Q|1167|ITGA10||CODING|NM_003637.3|17|1);FS=5.824;HaplotypeScore=7.7050;MLEAC=1;MLEAF=0.500;MQ=60.00;MQ0=0;MQRankSum=-0.368;QD=11.14;ReadPosRankSum=-1.020	chr1.145524989-145543868 ; 1q21.1 ; gain
ITGAM	integrin, alpha M (complement component 3 receptor 3 subunit)	0.0833333	AC=1;AF=0.500;AN=2;BaseQRankSum=-3.109;DP=500;Dels=0.00;EFF=NON_SYNONYMOUS_CODING(MODERATE|MISSENSE|gGg/gTg|G458V|1152|ITGAM||CODING|NM_000632.3|13|1),NON_SYNONYMOUS_CODING(MODERATE|MISSENSE|gGg/gTg|G458V|1153|ITGAM||CODING|NM_001145808.1|13|1);FS=1.229;HaplotypeScore=4.0498;MLEAC=1;MLEAF=0.500;MQ=58.14;MQ0=0;MQRankSum=2.586;QD=21.42;ReadPosRankSum=0.214	chr16.31271287-31344213 ; 16p11.2 ; gain
ITIH1	inter-alpha (globulin) inhibitor H1	0.138889	AC=1;AF=0.500;AN=2;BaseQRankSum=-12.427;DP=500;Dels=0.00;EFF=DOWNSTREAM(MODIFIER||||623|ITIH1||CODING|NM_001166435.2||1),DOWNSTREAM(MODIFIER||||623|ITIH1||CODING|NM_001166436.2||1),DOWNSTREAM(MODIFIER||||769|ITIH1||CODING|NM_001166434.2||1),DOWNSTREAM(MODIFIER||||911|ITIH1||CODING|NM_002215.3||1),NON_SYNONYMOUS_CODING(MODERATE|MISSENSE|Cac/Tac|H60Y|890|ITIH3||CODING|NM_002217.3|3|1);FS=8.764;Hapl…	chr3.52811601-52826084 ; 3p21.1 ; gain
ITIH2	inter-alpha (globulin) inhibitor H2	0.111111	AC=1;AF=0.500;AN=2;BaseQRankSum=-11.350;DP=500;Dels=0.00;EFF=NON_SYNONYMOUS_CODING(MODERATE|MISSENSE|tCc/tTc|S98F|946|ITIH2||CODING|NM_002216.2|4|1);FS=0.000;HaplotypeScore=6.8699;MLEAC=1;MLEAF=0.500;MQ=60.00;MQ0=0;MQRankSum=1.013;QD=13.65;ReadPosRankSum=-0.426	chr10.7745235-7791483 ; 10p14 ; gain
ITIH5	inter-alpha (globulin) inhibitor H5	0.111111	AC=1;AF=0.500;AN=2;BaseQRankSum=-11.838;DP=500;Dels=0.00;EFF=NON_SYNONYMOUS_CODING(MODERATE|MISSENSE|gCa/gAa|A92E|702|ITIH5||CODING|NM_001001851.2|3|1),NON_SYNONYMOUS_CODING(MODERATE|MISSENSE|gCa/gAa|A92E|942|ITIH5||CODING|NM_030569.6|3|1);FS=1.485;HaplotypeScore=6.4648;MLEAC=1;MLEAF=0.500;MQ=59.99;MQ0=0;MQRankSum=1.225;QD=14.29;ReadPosRankSum=-0.538	chr10.7601231-7708961 ; 10p14 ; gain
ITSN1	intersectin 1 (SH3 domain protein)	0.0555556	AC=2;AF=1.00;AN=2;BaseQRankSum=1.577;DP=500;Dels=0.00;EFF=NON_SYNONYMOUS_CODING(MODERATE|MISSENSE|cGc/cTc|R1461L|1721|ITSN1||CODING|NM_003024.2|35|1);FS=5.942;HaplotypeScore=20.2228;MLEAC=2;MLEAF=1.00;MQ=59.98;MQ0=0;MQRankSum=1.725;QD=33.31;ReadPosRankSum=-0.575	chr21.35014783-35261609 ; 21q22.11 ; gain
IVL	involucrin	0.138889	NA	chr1.152881038-152884362 ; 1q21.3 ; gain
IZUMO2	NA	0.0555556	AC=1;AF=0.500;AN=2;BaseQRankSum=-4.602;DP=500;Dels=0.00;EFF=NON_SYNONYMOUS_CODING(MODERATE|MISSENSE|Ggc/Agc|G59S|221|IZUMO2||CODING|NM_152358.2|1|1);FS=4.035;HaplotypeScore=4.3071;MLEAC=1;MLEAF=0.500;MQ=60.00;MQ0=0;MQRankSum=-0.394;QD=12.03;ReadPosRankSum=2.421	chr19.50655804-50666538 ; 19q13.33 ; gain
JAKMIP1	Janus kinase and microtubule interacting protein 1	0.0833333	AC=1;AF=0.500;AN=2;BaseQRankSum=-4.341;DP=500;Dels=0.00;EFF=DOWNSTREAM(MODIFIER||||626|JAKMIP1||CODING|NM_144720.3||1),NON_SYNONYMOUS_CODING(MODERATE|MISSENSE|Ctg/Atg|L673M|831|JAKMIP1||CODING|NM_001099433.1|16|1);FS=1.434;HaplotypeScore=8.6807;MLEAC=1;MLEAF=0.500;MQ=60.00;MQ0=0;MQRankSum=0.094;QD=13.95;ReadPosRankSum=-2.424	chr4.6027925-6202318 ; 4p16.1 ; gain
KALRN	kalirin, RhoGEF kinase	0.0555556	AC=1;AF=0.500;AN=2;BaseQRankSum=-13.694;DP=500;Dels=0.00;EFF=NON_SYNONYMOUS_CODING(MODERATE|MISSENSE|Gat/Tat|D318Y|1663|KALRN||CODING|NM_003947.4|5|1),NON_SYNONYMOUS_CODING(MODERATE|MISSENSE|Gat/Tat|D318Y|2986|KALRN||CODING|NM_001024660.3|5|1);FS=0.720;HaplotypeScore=6.6970;MLEAC=1;MLEAF=0.500;MQ=59.94;MQ0=0;MQRankSum=1.260;QD=19.49;ReadPosRankSum=-1.747	chr3.123813557-124440036 ; 3q21.2 ; gain
KCNA3	potassium voltage-gated channel, shaker-related subfamily, member 3	0.111111	AC=1;AF=0.500;AN=2;BaseQRankSum=6.719;DP=447;Dels=0.00;EFF=NON_SYNONYMOUS_CODING(MODERATE|MISSENSE|Gag/Cag|E262Q|575|KCNA3||CODING|NM_002232.3|1|1);FS=4.450;HaplotypeScore=32.2112;MLEAC=1;MLEAF=0.500;MQ=60.00;MQ0=0;MQRankSum=1.398;QD=11.20;ReadPosRankSum=0.445	chr1.111214309-111217655 ; 1p13.3 ; loss
KCNB2	potassium voltage-gated channel, Shab-related subfamily, member 2	0.0833333	NA	chr8.73449625-73850584 ; 8q13.3 ; gain
KCNC1	potassium voltage-gated channel, Shaw-related subfamily, member 1	0.222222	AC=1;AF=0.500;AN=2;BaseQRankSum=-11.244;DP=500;Dels=0.00;EFF=NON_SYNONYMOUS_CODING(MODERATE|MISSENSE|Gaa/Aaa|E497K|511|KCNC1||CODING|NM_004976.4|2|1),NON_SYNONYMOUS_CODING(MODERATE|MISSENSE|Gaa/Aaa|E497K|585|KCNC1||CODING|NM_001112741.1|2|1);FS=1.450;HaplotypeScore=5.5181;MLEAC=1;MLEAF=0.500;MQ=60.00;MQ0=0;MQRankSum=2.001;QD=13.66;ReadPosRankSum=-0.622	chr11.17757494-17804602 ; 11p15.1 ; gain
KCNH1	potassium voltage-gated channel, subfamily H (eag-related), member 1	0.0555556	AC=1;AF=0.500;AN=2;BaseQRankSum=-10.084;DP=500;Dels=0.00;EFF=NON_SYNONYMOUS_CODING(MODERATE|MISSENSE|aaG/aaT|K217N|962|KCNH1||CODING|NM_002238.3|6|1),NON_SYNONYMOUS_CODING(MODERATE|MISSENSE|aaG/aaT|K217N|989|KCNH1||CODING|NM_172362.2|6|1);FS=2.037;HaplotypeScore=4.9980;MLEAC=1;MLEAF=0.500;MQ=60.00;MQ0=0;MQRankSum=0.853;QD=6.02;ReadPosRankSum=0.861 , AC=1;AF=0.500;AN=2;BaseQRankSum=-3.134;DP=500;D…	chr1.210851656-211307457 ; 1q32.2 ; gain
KCNK4	potassium channel, subfamily K, member 4	0.0555556	AC=1;AF=0.500;AN=2;BaseQRankSum=-6.406;DP=500;Dels=0.00;EFF=NON_SYNONYMOUS_CODING(MODERATE|MISSENSE|Gac/Aac|D196N|393|KCNK4||CODING|NM_033310.2|5|1),UPSTREAM(MODIFIER||||200|TEX40||CODING|NM_001039496.1||1);FS=4.761;HaplotypeScore=4.9597;MLEAC=1;MLEAF=0.500;MQ=60.00;MQ0=0;MQRankSum=-0.591;QD=13.38;ReadPosRankSum=0.191	chr11.64058792-64067503 ; 11q13.1 ; gain
KCNMA1	potassium large conductance calcium-activated channel, subfamily M, alpha member 1	0.0555556	AC=1;AF=0.500;AN=2;BaseQRankSum=-5.846;DP=500;Dels=0.00;EFF=NON_SYNONYMOUS_CODING(MODERATE|MISSENSE|Ccg/Acg|P1031T|1178|KCNMA1||CODING|NM_002247.3|25|1),NON_SYNONYMOUS_CODING(MODERATE|MISSENSE|Ccg/Acg|P1035T|1182|KCNMA1||CODING|NM_001014797.2|26|1),NON_SYNONYMOUS_CODING(MODERATE|MISSENSE|Ccg/Acg|P1061T|1208|KCNMA1||CODING|NM_001271519.1|27|1),NON_SYNONYMOUS_CODING(MODERATE|MISSENSE|Ccg/Acg|P1072T…	chr10.78629358-79397577 ; 10q22.3 ; gain
KCNN1	potassium intermediate/small conductance calcium-activated channel, subfamily N, member 1	0.0555556	AC=1;AF=0.500;AN=2;BaseQRankSum=9.012;DP=500;Dels=0.00;EFF=NON_SYNONYMOUS_CODING(MODERATE|MISSENSE|cGg/cAg|R367Q|543|KCNN1||CODING|NM_002248.4|7|1);FS=0.326;HaplotypeScore=14.5149;MLEAC=1;MLEAF=0.500;MQ=59.98;MQ0=0;MQRankSum=1.437;QD=13.13;ReadPosRankSum=2.140	chr19.18062110-18109930 ; 19p13.11 ; loss
KCTD5	potassium channel tetramerisation domain containing 5	0.0833333	AC=2;AF=1.00;AN=2;BaseQRankSum=2.861;DP=500;Dels=0.00;EFF=NON_SYNONYMOUS_CODING(MODERATE|MISSENSE|tCg/tTg|S150L|234|KCTD5||CODING|NM_018992.3|3|1);FS=9.122;HaplotypeScore=8.8557;MLEAC=2;MLEAF=1.00;MQ=59.83;MQ0=1;MQRankSum=-0.473;QD=33.83;ReadPosRankSum=-1.361	chr16.2732494-2759031 ; 16p13.3 ; gain
KDM3A	lysine (K)-specific demethylase 3A	0.0555556	NA	chr2.86668270-86719839 ; 2p11.2 ; loss
KDM4B	lysine (K)-specific demethylase 4B	0.0555556	AC=1;AF=0.500;AN=2;BaseQRankSum=12.472;DP=500;Dels=0.00;EFF=NON_SYNONYMOUS_CODING(MODERATE|MISSENSE|Tac/Cac|Y196H|1096|KDM4B||CODING|NM_015015.2|6|1);FS=3.608;HaplotypeScore=8.1852;MLEAC=1;MLEAF=0.500;MQ=59.73;MQ0=1;MQRankSum=-0.031;QD=8.68;ReadPosRankSum=2.621	chr19.4969123-5153608 ; 19p13.3 ; loss
KHDRBS2	KH domain containing, RNA binding, signal transduction associated 2	0.0555556	AC=1;AF=0.500;AN=2;BaseQRankSum=3.100;DP=500;Dels=0.00;EFF=NON_SYNONYMOUS_CODING(MODERATE|MISSENSE|cAt/cTt|H264L|349|KHDRBS2||CODING|NM_152688.2|6|1);FS=1.529;HaplotypeScore=3.8985;MLEAC=1;MLEAF=0.500;MQ=60.00;MQ0=0;MQRankSum=0.906;QD=13.67;ReadPosRankSum=2.191	chr6.62389864-62996100 ; 6q11.1 ; gain
KIAA0232	KIAA0232	0.111111	AC=1;AF=0.500;AN=2;BaseQRankSum=7.036;DP=500;Dels=0.00;EFF=NON_SYNONYMOUS_CODING(MODERATE|MISSENSE|gAt/gGt|D741G|1395|KIAA0232||CODING|NM_001100590.1|6|1),NON_SYNONYMOUS_CODING(MODERATE|MISSENSE|gAt/gGt|D741G|1395|KIAA0232||CODING|NM_014743.2|7|1);FS=2.019;HaplotypeScore=3.6388;MLEAC=1;MLEAF=0.500;MQ=59.91;MQ0=0;MQRankSum=0.873;QD=2.48;ReadPosRankSum=0.117	chr4.6784458-6885899 ; 4p16.1 ; gain
KIAA0355	KIAA0355	0.166667	AC=1;AF=0.500;AN=2;BaseQRankSum=-13.206;DP=500;Dels=0.00;EFF=NON_SYNONYMOUS_CODING(MODERATE|MISSENSE|Ccc/Tcc|P988S|1070|KIAA0355||CODING|NM_014686.3|14|1);FS=4.634;HaplotypeScore=31.1754;MLEAC=1;MLEAF=0.500;MQ=59.95;MQ0=0;MQRankSum=1.057;QD=12.00;ReadPosRankSum=-1.013	chr19.34745455-34846471 ; 19q13.11 ; gain
KIAA1024	KIAA1024	0.0555556	AC=1;AF=0.500;AN=2;BaseQRankSum=2.070;DB;DP=500;Dels=0.00;EFF=NON_SYNONYMOUS_CODING(MODERATE|MISSENSE|gaC/gaG|D29E|916|KIAA1024||CODING|NM_015206.2|2|1);FS=1.888;HaplotypeScore=4.6501;MLEAC=1;MLEAF=0.500;MQ=60.00;MQ0=0;MQRankSum=-0.460;QD=12.30;ReadPosRankSum=-0.650	chr15.79724857-79764642 ; 15q25.1 ; gain
KIAA1161	KIAA1161	0.138889	NA	chr9.34368906-34376894 ; 9p13.3 ; gain
KIAA1199	KIAA1199	0.0555556	AC=1;AF=0.500;AN=2;BaseQRankSum=-4.614;DP=499;Dels=0.00;EFF=NON_SYNONYMOUS_CODING(MODERATE|MISSENSE|Cac/Aac|H983N|1361|KIAA1199||CODING|NM_018689.1|22|1);FS=10.336;HaplotypeScore=8.7947;MLEAC=1;MLEAF=0.500;MQ=60.00;MQ0=0;MQRankSum=-0.954;QD=14.07;ReadPosRankSum=-1.552	chr15.81071711-81243999 ; 15q25.1 ; gain
KIAA1211	KIAA1211	0.111111	AC=1;AF=0.500;AN=2;BaseQRankSum=-11.559;DP=500;Dels=0.00;EFF=NON_SYNONYMOUS_CODING(MODERATE|MISSENSE|tGc/tTc|C235F|1233|KIAA1211||CODING|NM_020722.1|8|1);FS=0.000;HaplotypeScore=7.3502;MLEAC=1;MLEAF=0.500;MQ=60.00;MQ0=0;MQRankSum=-0.433;QD=15.61;ReadPosRankSum=-0.800	chr4.57036360-57196890 ; 4q12 ; gain
KIAA1377	KIAA1377	0.0555556	AC=1;AF=0.500;AN=2;BaseQRankSum=-11.471;DP=500;Dels=0.00;EFF=NON_SYNONYMOUS_CODING(MODERATE|MISSENSE|gGa/gTa|G702V|1117|KIAA1377||CODING|NM_020802.2|6|1);FS=0.000;HaplotypeScore=5.8174;MLEAC=1;MLEAF=0.500;MQ=59.96;MQ0=0;MQRankSum=-1.250;QD=21.86;ReadPosRankSum=-0.130	chr11.101785745-101871793 ; 11q22.1 ; gain
KIAA1462	KIAA1462	0.0833333	AC=1;AF=0.500;AN=2;BaseQRankSum=-2.975;DP=500;Dels=0.00;EFF=NON_SYNONYMOUS_CODING(MODERATE|MISSENSE|Cca/Aca|P1224T|1359|KIAA1462||CODING|NM_020848.2|3|1);FS=0.352;HaplotypeScore=6.4874;MLEAC=1;MLEAF=0.500;MQ=60.00;MQ0=0;MQRankSum=-0.484;QD=5.41;ReadPosRankSum=1.549	chr10.30301728-30348488 ; 10p11.23 ; gain
KIAA2018	KIAA2018	0.111111	AC=1;AF=0.500;AN=2;BaseQRankSum=-12.796;DP=500;Dels=0.00;EFF=NON_SYNONYMOUS_CODING(MODERATE|MISSENSE|tCa/tTa|S644L|2245|KIAA2018||CODING|NM_001009899.2|7|1);FS=1.865;HaplotypeScore=0.9958;MLEAC=1;MLEAF=0.500;MQ=59.90;MQ0=0;MQRankSum=1.087;QD=14.04;ReadPosRankSum=-0.825	chr3.113367232-113415493 ; 3q13.2 ; gain
KIF1C	kinesin family member 1C	0.0555556	NA	chr17.4901242-4931694 ; 17p13.2 ; gain
KIF21A	kinesin family member 21A	0.111111	AC=1;AF=0.500;AN=2;BaseQRankSum=-13.961;DP=500;Dels=0.00;EFF=NON_SYNONYMOUS_CODING(MODERATE|MISSENSE|tCc/tAc|S326Y|1621|KIF21A||CODING|NM_001173465.1|7|1),NON_SYNONYMOUS_CODING(MODERATE|MISSENSE|tCc/tAc|S326Y|1637|KIF21A||CODING|NM_001173463.1|7|1),NON_SYNONYMOUS_CODING(MODERATE|MISSENSE|tCc/tAc|S326Y|1661|KIF21A||CODING|NM_017641.3|7|1),NON_SYNONYMOUS_CODING(MODERATE|MISSENSE|tCc/tAc|S326Y|1674|…	chr12.39687029-39837192 ; 12q12 ; gain
KIF24	kinesin family member 24	0.138889	NA	chr9.34252377-34329198 ; 9p13.3 ; gain
KIF2B	kinesin family member 2B	0.0555556	AC=1;AF=0.500;AN=2;BaseQRankSum=-2.137;DP=500;Dels=0.00;EFF=NON_SYNONYMOUS_CODING(MODERATE|MISSENSE|gaA/gaT|E192D|673|KIF2B||CODING|NM_032559.4|1|1);FS=0.327;HaplotypeScore=9.6150;MLEAC=1;MLEAF=0.500;MQ=60.00;MQ0=0;MQRankSum=-0.422;QD=13.91;ReadPosRankSum=0.289	chr17.51900238-51902573 ; 17q22 ; loss
KIF5A	kinesin family member 5A	0.0555556	AC=1;AF=0.500;AN=2;BaseQRankSum=-8.174;DP=500;Dels=0.00;EFF=NON_SYNONYMOUS_CODING(MODERATE|MISSENSE|Gcc/Tcc|A916S|1032|KIF5A||CODING|NM_004984.2|24|1);FS=10.082;HaplotypeScore=35.4074;MLEAC=1;MLEAF=0.500;MQ=59.87;MQ0=0;MQRankSum=-0.600;QD=15.68;ReadPosRankSum=-0.369	chr12.57943846-57978554 ; 12q13.3 ; gain
KIFAP3	kinesin-associated protein 3	0.138889	AC=1;AF=0.500;AN=2;BaseQRankSum=7.168;DP=500;Dels=0.00;EFF=NON_SYNONYMOUS_CODING(MODERATE|MISSENSE|cGa/cTa|R117L|748|KIFAP3||CODING|NM_001204516.1|4|1),NON_SYNONYMOUS_CODING(MODERATE|MISSENSE|cGa/cTa|R121L|752|KIFAP3||CODING|NM_001204517.1|5|1),NON_SYNONYMOUS_CODING(MODERATE|MISSENSE|cGa/cTa|R161L|792|KIFAP3||CODING|NM_014970.3|5|1),NON_SYNONYMOUS_CODING(MODERATE|MISSENSE|cGa/cTa|R83L|714|KIFAP3|…	chr1.169890469-170043879 ; 1q24.2 ; gain
KIR2DL3	killer cell immunoglobulin-like receptor, two domains, long cytoplasmic tail, 3	0.5	AC=1;AF=0.500;AN=2;BaseQRankSum=-2.501;DB;DP=500;Dels=0.00;EFF=NON_SYNONYMOUS_CODING(MODERATE|MISSENSE|cGc/cAc|R318H|341|KIR2DL3||CODING|NM_015868.2|8|1);FS=1.061;HaplotypeScore=11.0042;MLEAC=1;MLEAF=0.500;MQ=52.70;MQ0=0;MQRankSum=4.845;QD=12.49;ReadPosRankSum=1.066	chr19.55249973-55264504 ; 19q13.42 ; gain
KIRREL3	kin of IRRE like 3 (Drosophila)	0.0555556	AC=1;AF=0.500;AN=2;BaseQRankSum=13.278;DP=500;Dels=0.00;EFF=NON_SYNONYMOUS_CODING(MODERATE|MISSENSE|Gtg/Ctg|V226L|600|KIRREL3||CODING|NM_001161707.1|6|1),NON_SYNONYMOUS_CODING(MODERATE|MISSENSE|Gtg/Ctg|V226L|778|KIRREL3||CODING|NM_032531.3|6|1);FS=4.433;HaplotypeScore=3.4057;MLEAC=1;MLEAF=0.500;MQ=60.00;MQ0=0;MQRankSum=-0.190;QD=14.67;ReadPosRankSum=-0.989	chr11.126293395-126870766 ; 11q24.2 ; gain
KLF17	Kruppel-like factor 17	0.416667	AC=1;AF=0.500;AN=2;BaseQRankSum=-3.442;DB;DP=500;Dels=0.00;EFF=NON_SYNONYMOUS_CODING(MODERATE|MISSENSE|aTc/aAc|I35N|389|KLF17||CODING|NM_173484.3|2|1);FS=0.000;HaplotypeScore=4.3043;MLEAC=1;MLEAF=0.500;MQ=60.00;MQ0=0;MQRankSum=-0.961;QD=13.99;ReadPosRankSum=1.005	chr1.44584521-44600809 ; 1p34.1 ; loss
KLF6	Kruppel-like factor 6	0.0555556	AC=1;AF=0.500;AN=2;BaseQRankSum=-10.326;DP=500;Dels=0.00;EFF=EXON(MODIFIER|||||KLF6||CODING|NR_027653.1|3|1),INTRON(MODIFIER||||237|KLF6||CODING|NM_001160125.1|2|1),NON_SYNONYMOUS_CODING(MODERATE|MISSENSE|Gag/Aag|E204K|241|KLF6||CODING|NM_001160124.1|3|1),NON_SYNONYMOUS_CODING(MODERATE|MISSENSE|Gag/Aag|E246K|283|KLF6||CODING|NM_001300.5|3|1);FS=0.666;HaplotypeScore=4.6915;MLEAC=1;MLEAF=0.500;MQ=6…	chr10.3818187-3827473 ; 10p15.1 ; gain
KLHL11	kelch-like 11 (Drosophila)	0.0555556	AC=1;AF=0.500;AN=2;BaseQRankSum=-1.665;DP=500;Dels=0.00;EFF=NON_SYNONYMOUS_CODING(MODERATE|MISSENSE|Gaa/Caa|E595Q|708|KLHL11||CODING|NM_018143.1|2|1);FS=1.501;HaplotypeScore=5.9571;MLEAC=1;MLEAF=0.500;MQ=59.89;MQ0=0;MQRankSum=-1.006;QD=9.69;ReadPosRankSum=-0.094	chr17.40009798-40021629 ; 17q21.2 ; gain
KLHL38	kelch-like 38 (Drosophila)	0.194444	AC=1;AF=0.500;AN=2;BaseQRankSum=-12.800;DB;DP=500;Dels=0.00;EFF=NON_SYNONYMOUS_CODING(MODERATE|MISSENSE|tGt/tAt|C504Y|581|KLHL38||CODING|NM_001081675.2|3|1);FS=22.741;HaplotypeScore=2.9690;MLEAC=1;MLEAF=0.500;MQ=60.00;MQ0=0;MQRankSum=0.772;QD=11.45;ReadPosRankSum=3.197	chr8.124657914-124665190 ; 8q24.13 ; gain
KLKB1	kallikrein B, plasma (Fletcher factor) 1	0.0555556	NA	chr4.187148671-187179625 ; 4q35.2 ; gain
KNDC1	kinase non-catalytic C-lobe domain (KIND) containing 1	0.0833333	AC=1;AF=0.500;AN=2;BaseQRankSum=-1.804;DP=500;Dels=0.00;EFF=NON_SYNONYMOUS_CODING(MODERATE|MISSENSE|Gcg/Acg|A440T|1749|KNDC1||CODING|NM_152643.6|6|1);FS=3.959;HaplotypeScore=6.8080;MLEAC=1;MLEAF=0.500;MQ=59.95;MQ0=0;MQRankSum=-1.856;QD=12.55;ReadPosRankSum=-0.465	chr10.134973970-135039916 ; 10q26.3 ; gain
KPRP	keratinocyte proline-rich protein	0.166667	AC=1;AF=0.500;AN=2;BaseQRankSum=-3.824;DP=499;Dels=0.00;EFF=NON_SYNONYMOUS_CODING(MODERATE|MISSENSE|tgG/tgT|W502C|579|KPRP||CODING|NM_001025231.1|2|1);FS=0.683;HaplotypeScore=10.1416;MLEAC=1;MLEAF=0.500;MQ=60.00;MQ0=0;MQRankSum=0.794;QD=13.41;ReadPosRankSum=-0.411	chr1.152730505-152734529 ; 1q21.3 ; gain
KRT27	keratin 27	0.0833333	AC=1;AF=0.500;AN=2;BaseQRankSum=6.788;DP=500;Dels=0.00;EFF=NON_SYNONYMOUS_CODING(MODERATE|MISSENSE|Cgt/Tgt|R129C|459|KRT27||CODING|NM_181537.3|1|1);FS=0.389;HaplotypeScore=2.9465;MLEAC=1;MLEAF=0.500;MQ=60.00;MQ0=0;MQRankSum=-1.573;QD=3.02;ReadPosRankSum=-0.508	chr17.38933059-38938786 ; 17q21.2 ; gain
KRT34	keratin 34	0.0555556	AC=1;AF=0.500;AN=2;BaseQRankSum=-0.701;DP=500;Dels=0.00;EFF=NON_SYNONYMOUS_CODING(MODERATE|MISSENSE|cTg/cAg|L52Q|436|KRT34||CODING|NM_021013.3|1|1);FS=6.998;HaplotypeScore=11.6721;MLEAC=1;MLEAF=0.500;MQ=59.98;MQ0=0;MQRankSum=0.952;QD=16.44;ReadPosRankSum=-0.590	chr17.39533920-39538636 ; 17q21.2 ; gain
KRT36	keratin 36	0.0555556	AC=1;AF=0.500;AN=2;BaseQRankSum=-7.815;DP=500;Dels=0.00;EFF=NON_SYNONYMOUS_CODING(MODERATE|MISSENSE|Gaa/Aaa|E234K|467|KRT36||CODING|NM_003771.4|4|1);FS=2.043;HaplotypeScore=8.0798;MLEAC=1;MLEAF=0.500;MQ=60.00;MQ0=0;MQRankSum=0.952;QD=13.64;ReadPosRankSum=-0.620	chr17.39642387-39646116 ; 17q21.2 ; gain
KRT38	keratin 38	0.0555556	NA	chr17.39592620-39597596 ; 17q21.2 ; gain
KRTAP4-11	keratin associated protein 4-6; keratin associated protein 4-7; keratin associated protein 4-8; keratin associated protein 4-11	0.222222	AC=1;AF=0.500;AN=2;BaseQRankSum=7.076;DB;DP=497;Dels=0.00;EFF=NON_SYNONYMOUS_CODING(MODERATE|MISSENSE|Atg/Gtg|M93V|195|KRTAP4-11||CODING|NM_033059.3|1|1);FS=0.359;HaplotypeScore=4.3010;MLEAC=1;MLEAF=0.500;MQ=45.86;MQ0=36;MQRankSum=-17.023;QD=1.79;ReadPosRankSum=-6.360	chr17.39273433-39274606 ; 17q21.2 ; loss
KRTCAP3	keratinocyte associated protein 3	0.0555556	AC=1;AF=0.500;AN=2;BaseQRankSum=-6.772;DP=500;Dels=0.00;EFF=DOWNSTREAM(MODIFIER||||240|KRTCAP3||CODING|NM_001168364.1||1),NON_SYNONYMOUS_CODING(MODERATE|MISSENSE|Gct/Act|A1351T|1749|IFT172||CODING|NM_015662.1|37|1);FS=5.671;HaplotypeScore=4.9160;MLEAC=1;MLEAF=0.500;MQ=60.00;MQ0=0;MQRankSum=0.135;QD=13.16;ReadPosRankSum=-1.292	chr2.27665232-27669348 ; 2p23.3 ; loss
KYNU	kynureninase (L-kynurenine hydrolase)	0.0555556	AC=1;AF=0.500;AN=2;BaseQRankSum=-5.278;DP=500;Dels=0.00;EFF=NON_SYNONYMOUS_CODING(MODERATE|MISSENSE|Cta/Gta|L133V|307|KYNU||CODING|NM_001032998.1|5|1),NON_SYNONYMOUS_CODING(MODERATE|MISSENSE|Cta/Gta|L133V|465|KYNU||CODING|NM_001199241.1|6|1),NON_SYNONYMOUS_CODING(MODERATE|MISSENSE|Cta/Gta|L133V|465|KYNU||CODING|NM_003937.2|5|1);FS=3.302;HaplotypeScore=4.8233;MLEAC=1;MLEAF=0.500;MQ=60.00;MQ0=0;MQR…	chr2.143635194-143799885 ; 2q22.2 ; loss
LAMA2	laminin, alpha 2	0.277778	AC=1;AF=0.500;AN=2;BaseQRankSum=-8.720;DP=500;Dels=0.00;EFF=NON_SYNONYMOUS_CODING(MODERATE|MISSENSE|tTc/tAc|F873Y|3118|LAMA2||CODING|NM_001079823.1|19|1),NON_SYNONYMOUS_CODING(MODERATE|MISSENSE|tTc/tAc|F873Y|3122|LAMA2||CODING|NM_000426.3|19|1);FS=24.151;HaplotypeScore=9.2236;MLEAC=1;MLEAF=0.500;MQ=59.99;MQ0=0;MQRankSum=-1.477;QD=2.22;ReadPosRankSum=-1.597	chr6.129204285-129837710 ; 6q22.33 ; gain
LAMB2	laminin, beta 2 (laminin S)	0.111111	AC=1;AF=0.500;AN=2;BaseQRankSum=-2.245;DP=500;Dels=0.00;EFF=NON_SYNONYMOUS_CODING(MODERATE|MISSENSE|cCc/cTc|P928L|1798|LAMB2||CODING|NM_002292.3|20|1),UPSTREAM(MODIFIER||||1318|USP19||CODING|NM_006677.2||1),UPSTREAM(MODIFIER||||1372|USP19||CODING|NM_001199162.1||1),UPSTREAM(MODIFIER||||1384|USP19||CODING|NM_001199161.1||1),UPSTREAM(MODIFIER||||1419|USP19||CODING|NM_001199160.1||1);FS=0.682;Haplot…	chr3.49158546-49170599 ; 3p21.31 ; gain
LELP1	late cornified envelope-like proline-rich 1	0.111111	AC=1;AF=0.500;AN=2;BaseQRankSum=-11.681;DP=500;Dels=0.00;EFF=NON_SYNONYMOUS_CODING(MODERATE|MISSENSE|caG/caT|Q32H|98|LELP1||CODING|NM_001010857.2|2|1);FS=6.500;HaplotypeScore=1.9142;MLEAC=1;MLEAF=0.500;MQ=60.00;MQ0=0;MQRankSum=0.927;QD=19.71;ReadPosRankSum=-1.613	chr1.153175905-153177601 ; 1q21.3 ; gain
LHX8	LIM homeobox 8	0.0833333	AC=1;AF=0.500;AN=2;BaseQRankSum=-0.066;DP=500;Dels=0.01;EFF=NON_SYNONYMOUS_CODING(MODERATE|MISSENSE|cAt/cCt|H323P|346|LHX8||CODING|NM_001256114.1|9|1),NON_SYNONYMOUS_CODING(MODERATE|MISSENSE|cAt/cCt|H333P|356|LHX8||CODING|NM_001001933.1|10|1);FS=8.131;HaplotypeScore=21.2192;MLEAC=1;MLEAF=0.500;MQ=59.97;MQ0=0;MQRankSum=-1.504;QD=8.85;ReadPosRankSum=-0.847	chr1.75594118-75627218 ; 1p31.1 ; loss
LILRB1	leukocyte immunoglobulin-like receptor, subfamily B (with TM and ITIM domains), member 1	0.138889	AC=1;AF=0.500;AN=2;BaseQRankSum=2.285;DP=500;Dels=0.00;EFF=NON_SYNONYMOUS_CODING(MODERATE|MISSENSE|gTg/gGg|V78G|650|LILRB1||CODING|NM_006669.3|5|1),NON_SYNONYMOUS_CODING(MODERATE|MISSENSE|gTg/gGg|V78G|651|LILRB1||CODING|NM_001081638.1|4|1),NON_SYNONYMOUS_CODING(MODERATE|MISSENSE|gTg/gGg|V78G|651|LILRB1||CODING|NM_001081639.1|4|1),NON_SYNONYMOUS_CODING(MODERATE|MISSENSE|gTg/gGg|V78G|652|LILRB1||CO…	chr19.55128628-55149004 ; 19q13.42 ; gain
LILRB4	leukocyte immunoglobulin-like receptor, subfamily B (with TM and ITIM domains), member 4	0.527778	AC=1;AF=0.500;AN=2;BaseQRankSum=-5.968;DB;DP=500;Dels=0.00;EFF=NON_SYNONYMOUS_CODING(MODERATE|MISSENSE|cAg/cGg|Q413R|447|LILRB4||CODING|NM_001081438.1|12|1),NON_SYNONYMOUS_CODING(MODERATE|MISSENSE|cAg/cGg|Q414R|448|LILRB4||CODING|NM_006847.3|12|1);FS=5.599;HaplotypeScore=5.8629;MLEAC=1;MLEAF=0.500;MQ=58.56;MQ0=1;MQRankSum=8.349;QD=12.41;ReadPosRankSum=1.142	chr19.55174123-55179846 ; 19q13.42 ; gain
LIMS1	LIM and senescent cell antigen-like domains 1	0.166667	AC=1;AF=0.500;AN=2;BaseQRankSum=10.816;DP=500;Dels=0.00;EFF=NON_SYNONYMOUS_CODING(MODERATE|MISSENSE|Gtg/Ttg|V204L|325|LIMS1||CODING|NM_001193488.1|6|1),NON_SYNONYMOUS_CODING(MODERATE|MISSENSE|Gtg/Ttg|V204L|325|LIMS1||CODING|NM_004987.5|6|1),NON_SYNONYMOUS_CODING(MODERATE|MISSENSE|Gtg/Ttg|V208L|329|LIMS1||CODING|NM_001193482.1|6|1),NON_SYNONYMOUS_CODING(MODERATE|MISSENSE|Gtg/Ttg|V216L|337|LIMS1||C…	chr2.109150810-109303702 ; 2q12.3 ; gain
LINGO2	leucine rich repeat and Ig domain containing 2	0.138889	AC=1;AF=0.500;AN=2;BaseQRankSum=-0.486;DP=500;Dels=0.00;EFF=NON_SYNONYMOUS_CODING(MODERATE|MISSENSE|aAc/aTc|N67I|606|LINGO2||CODING|NM_001258282.1|7|1),NON_SYNONYMOUS_CODING(MODERATE|MISSENSE|aAc/aTc|N67I|606|LINGO2||CODING|NM_152570.2|7|1);FS=4.386;HaplotypeScore=1.9325;MLEAC=1;MLEAF=0.500;MQ=60.00;MQ0=0;MQRankSum=-0.797;QD=13.71;ReadPosRankSum=-0.095	chr9.27948083-29212998 ; 9p21.2 ; gain
LMTK3	lemur tyrosine kinase 3	0.0555556	AC=1;AF=0.500;AN=2;BaseQRankSum=0.475;DP=324;Dels=0.00;EFF=NON_SYNONYMOUS_CODING(MODERATE|MISSENSE|gGg/gCg|G1364A|1489|LMTK3||CODING|NM_001080434.1|13|1);FS=4.609;HaplotypeScore=11.1248;MLEAC=1;MLEAF=0.500;MQ=59.97;MQ0=0;MQRankSum=0.466;QD=8.48;ReadPosRankSum=3.271 , AC=1;AF=0.500;AN=2;BaseQRankSum=10.248;DP=207;Dels=0.00;EFF=NON_SYNONYMOUS_CODING(MODERATE|MISSENSE|Gcg/Acg|A1351T|1489|LMTK3||CODI…	chr19.48988527-49016446 ; 19q13.33 ; gain
LOXHD1	lipoxygenase homology domains 1	0.222222	AC=1;AF=0.500;AN=2;BaseQRankSum=-11.585;DP=500;Dels=0.00;EFF=NON_SYNONYMOUS_CODING(MODERATE|MISSENSE|gCt/gTt|A291V|2211|LOXHD1||CODING|NM_144612.6|7|1);FS=2.470;HaplotypeScore=6.5274;MLEAC=1;MLEAF=0.500;MQ=59.97;MQ0=0;MQRankSum=0.844;QD=12.18;ReadPosRankSum=-0.305	chr18.44056934-44236996 ; 18q21.1 ; gain
LPHN3	latrophilin 3	0.0555556	AC=1;AF=0.500;AN=2;BaseQRankSum=1.496;DP=500;Dels=0.00;EFF=NON_SYNONYMOUS_CODING(MODERATE|MISSENSE|aAc/aTc|N1311I|1469|LPHN3||CODING|NM_015236.4|23|1);FS=4.838;HaplotypeScore=11.0887;MLEAC=1;MLEAF=0.500;MQ=60.00;MQ0=0;MQRankSum=-0.751;QD=5.67;ReadPosRankSum=-1.971	chr4.62362838-62938168 ; 4q13.1 ; gain
LRFN2	leucine rich repeat and fibronectin type III domain containing 2	0.0555556	AC=1;AF=0.500;AN=2;BaseQRankSum=-10.763;DP=500;Dels=0.00;EFF=NON_SYNONYMOUS_CODING(MODERATE|MISSENSE|tCc/tTc|S95F|789|LRFN2||CODING|NM_020737.1|2|1);FS=3.869;HaplotypeScore=12.2446;MLEAC=1;MLEAF=0.500;MQ=60.00;MQ0=0;MQRankSum=0.589;QD=11.17;ReadPosRankSum=0.776	chr6.40359372-40555126 ; 6p21.2 ; gain
LRFN5	leucine rich repeat and fibronectin type III domain containing 5	0.166667	AC=1;AF=0.500;AN=2;BaseQRankSum=1.386;DP=500;Dels=0.00;EFF=NON_SYNONYMOUS_CODING(MODERATE|MISSENSE|ttG/ttC|L248F|719|LRFN5||CODING|NM_152447.3|3|1);FS=2.574;HaplotypeScore=2.7264;MLEAC=1;MLEAF=0.500;MQ=59.91;MQ0=0;MQRankSum=-0.790;QD=19.17;ReadPosRankSum=0.217	chr14.42076763-42373752 ; 14q21.1 ; gain
LRIG1	leucine-rich repeats and immunoglobulin-like domains 1	0.111111	AC=2;AF=1.00;AN=2;BaseQRankSum=-3.499;DP=500;Dels=0.00;EFF=NON_SYNONYMOUS_CODING(MODERATE|MISSENSE|Cac/Gac|H606D|1093|LRIG1||CODING|NM_015541.2|14|1);FS=1.001;HaplotypeScore=13.8305;MLEAC=2;MLEAF=1.00;MQ=60.00;MQ0=0;MQRankSum=1.257;QD=28.39;ReadPosRankSum=-1.696	chr3.66429220-66550845 ; 3p14.1 ; gain
LRP6	low density lipoprotein receptor-related protein 6	0.111111	AC=2;AF=1.00;AN=2;BaseQRankSum=0.900;DP=500;Dels=0.00;EFF=NON_SYNONYMOUS_CODING(MODERATE|MISSENSE|cAg/cTg|Q870L|1613|LRP6||CODING|NM_002336.2|12|1);FS=18.181;HaplotypeScore=11.8798;MLEAC=2;MLEAF=1.00;MQ=60.00;MQ0=0;MQRankSum=0.866;QD=33.61;ReadPosRankSum=-1.316	chr12.12268960-12419811 ; 12p13.2 ; gain
LRRC66	leucine rich repeat containing 66	0.0833333	AC=1;AF=0.500;AN=2;BaseQRankSum=-11.216;DP=500;Dels=0.00;EFF=NON_SYNONYMOUS_CODING(MODERATE|MISSENSE|Gat/Tat|D825Y|880|LRRC66||CODING|NM_001024611.1|4|1);FS=9.913;HaplotypeScore=4.7366;MLEAC=1;MLEAF=0.500;MQ=60.00;MQ0=0;MQRankSum=0.238;QD=12.71;ReadPosRankSum=-1.238	chr4.52859865-52883786 ; 4q12 ; gain
LRRC7	leucine rich repeat containing 7	0.111111	AC=1;AF=0.500;AN=2;BaseQRankSum=-7.607;DP=500;Dels=0.00;EFF=NON_SYNONYMOUS_CODING(MODERATE|MISSENSE|gCc/gAc|A508D|1537|LRRC7||CODING|NM_020794.2|15|1);FS=7.309;HaplotypeScore=2.5673;MLEAC=1;MLEAF=0.500;MQ=60.00;MQ0=0;MQRankSum=0.395;QD=23.58;ReadPosRankSum=-1.180	chr1.70225857-70589171 ; 1p31.1 ; loss
LRRIQ1	leucine-rich repeats and IQ motif containing 1	0.111111	AC=1;AF=0.500;AN=2;BaseQRankSum=-2.480;DP=500;Dels=0.00;EFF=NON_SYNONYMOUS_CODING(MODERATE|MISSENSE|tgG/tgC|W1522C|1722|LRRIQ1||CODING|NM_001079910.1|22|1);FS=18.481;HaplotypeScore=4.3066;MLEAC=1;MLEAF=0.500;MQ=60.02;MQ0=0;MQRankSum=1.585;QD=9.33;ReadPosRankSum=0.450	chr12.85430098-85638883 ; 12q21.31 ; gain
MACF1	microtubule-actin crosslinking factor 1	0.305556	AC=1;AF=0.500;AN=2;BaseQRankSum=-4.040;DP=500;Dels=0.00;EFF=NON_SYNONYMOUS_CODING(MODERATE|MISSENSE|Tct/Act|S3022T|5430|MACF1||CODING|NM_012090.4|54|1);FS=10.624;HaplotypeScore=3.9354;MLEAC=1;MLEAF=0.500;MQ=59.99;MQ0=0;MQRankSum=1.368;QD=20.21;ReadPosRankSum=-0.406 , AC=1;AF=0.500;AN=2;BaseQRankSum=-6.882;DP=500;Dels=0.00;EFF=NON_SYNONYMOUS_CODING(MODERATE|MISSENSE|aGc/aTc|S4789I|5430|MACF1||CODI…	chr1.39547088-39952810 ; 1p34.3 ; gain
MAML2	mastermind-like 2 (Drosophila)	0.0555556	AC=1;AF=0.500;AN=2;BaseQRankSum=7.277;DP=500;Dels=0.00;EFF=NON_SYNONYMOUS_CODING(MODERATE|MISSENSE|gGt/gCt|G740A|1156|MAML2||CODING|NM_032427.1|3|1);FS=3.315;HaplotypeScore=6.4297;MLEAC=1;MLEAF=0.500;MQ=59.99;MQ0=0;MQRankSum=-1.133;QD=15.01;ReadPosRankSum=-0.455	chr11.95711439-96076344 ; 11q21 ; gain
MAN1B1	mannosidase, alpha, class 1B, member 1	0.0555556	NA	chr9.139981378-140003639 ; 9q34.3 ; gain
MANBA	mannosidase, beta A, lysosomal	0.638889	AC=1;AF=0.500;AN=2;BaseQRankSum=3.726;DB;DP=500;Dels=0.00;EFF=NON_SYNONYMOUS_CODING(MODERATE|MISSENSE|aCg/aTg|T701M|879|MANBA||CODING|NM_005908.3|15|1);FS=0.748;HaplotypeScore=3.8313;MLEAC=1;MLEAF=0.500;MQ=60.00;MQ0=0;MQRankSum=-0.920;QD=9.47;ReadPosRankSum=-0.512	chr4.103552642-103682151 ; 4q24 ; loss
MANEA	mannosidase, endo-alpha	0.222222	AC=1;AF=0.500;AN=2;BaseQRankSum=3.720;DB;DP=500;Dels=0.00;EFF=NON_SYNONYMOUS_CODING(MODERATE|MISSENSE|Ttt/Att|F344I|462|MANEA||CODING|NM_024641.3|5|1);FS=1.622;HaplotypeScore=3.9840;MLEAC=1;MLEAF=0.500;MQ=59.96;MQ0=0;MQRankSum=0.508;QD=14.09;ReadPosRankSum=-1.422	chr6.96025372-96057328 ; 6q16.1 ; gain
MASTL	microtubule associated serine/threonine kinase-like	0.0833333	AC=1;AF=0.500;AN=2;BaseQRankSum=-2.018;DP=500;Dels=0.00;EFF=NON_SYNONYMOUS_CODING(MODERATE|MISSENSE|Gat/Cat|D203H|840|MASTL||CODING|NM_001172304.1|5|1),NON_SYNONYMOUS_CODING(MODERATE|MISSENSE|Gat/Cat|D203H|878|MASTL||CODING|NM_032844.3|5|1),NON_SYNONYMOUS_CODING(MODERATE|MISSENSE|Gat/Cat|D203H|879|MASTL||CODING|NM_001172303.1|5|1);FS=5.433;HaplotypeScore=5.6290;MLEAC=1;MLEAF=0.500;MQ=59.94;MQ0=0;…	chr10.27443752-27475848 ; 10p12.1 ; gain
MATN4	matrilin 4	0.0833333	AC=1;AF=0.500;AN=2;BaseQRankSum=-5.507;DP=500;Dels=0.00;EFF=NON_SYNONYMOUS_CODING(MODERATE|MISSENSE|gaG/gaT|E227D|499|MATN4||CODING|NM_030592.2|4|1),NON_SYNONYMOUS_CODING(MODERATE|MISSENSE|gaG/gaT|E268D|540|MATN4||CODING|NM_030590.2|5|1),NON_SYNONYMOUS_CODING(MODERATE|MISSENSE|gaG/gaT|E309D|581|MATN4||CODING|NM_003833.3|6|1);FS=4.056;HaplotypeScore=6.3313;MLEAC=1;MLEAF=0.500;MQ=60.00;MQ0=0;MQRank…	chr20.43922086-43936967 ; 20q13.12 ; loss
MBD5	methyl-CpG binding domain protein 5	0.138889	AC=1;AF=0.500;AN=2;BaseQRankSum=-2.049;DP=500;Dels=0.00;EFF=NON_SYNONYMOUS_CODING(MODERATE|MISSENSE|cAg/cTg|Q931L|1494|MBD5||CODING|NM_018328.4|10|1);FS=5.542;HaplotypeScore=9.7899;MLEAC=1;MLEAF=0.500;MQ=60.00;MQ0=0;MQRankSum=1.496;QD=4.20;ReadPosRankSum=-0.345	chr2.148778579-149271044 ; 2q23.1 ; loss
MBIP	MAP3K12 binding inhibitory protein 1	0.222222	AC=1;AF=0.500;AN=2;BaseQRankSum=-3.665;DP=500;Dels=0.00;EFF=NON_SYNONYMOUS_CODING(MODERATE|MISSENSE|aGa/aCa|R225T|343|MBIP||CODING|NM_001144891.1|6|1),NON_SYNONYMOUS_CODING(MODERATE|MISSENSE|aGa/aCa|R225T|344|MBIP||CODING|NM_016586.2|6|1);FS=2.678;HaplotypeScore=7.4700;MLEAC=1;MLEAF=0.500;MQ=60.00;MQ0=0;MQRankSum=0.496;QD=13.88;ReadPosRankSum=0.128	chr14.36767763-36789882 ; 14q13.3 ; gain
MCF2L2	MCF.2 cell line derived transforming sequence-like 2	0.416667	AC=1;AF=0.500;AN=2;BaseQRankSum=8.623;DB;DP=500;Dels=0.00;EFF=NON_SYNONYMOUS_CODING(MODERATE|MISSENSE|Att/Ctt|I359L|1114|MCF2L2||CODING|NM_015078.2|10|1);FS=2.396;HaplotypeScore=1.9148;MLEAC=1;MLEAF=0.500;MQ=60.00;MQ0=0;MQRankSum=-0.678;QD=13.80;ReadPosRankSum=-1.242	chr3.182895830-183145855 ; 3q27.1 ; gain
MDGA2	MAM domain containing glycosylphosphatidylinositol anchor 2	0.166667	AC=1;AF=0.500;AN=2;BaseQRankSum=6.130;DP=500;Dels=0.00;EFF=NON_SYNONYMOUS_CODING(MODERATE|MISSENSE|Aac/Cac|N119H|727|MDGA2||CODING|NM_182830.3|7|1),NON_SYNONYMOUS_CODING(MODERATE|MISSENSE|Aac/Cac|N417H|1025|MDGA2||CODING|NM_001113498.2|7|1);FS=18.407;HaplotypeScore=6.2609;MLEAC=1;MLEAF=0.500;MQ=60.00;MQ0=0;MQRankSum=0.995;QD=21.22;ReadPosRankSum=-0.191	chr14.47308827-48144157 ; 14q21.3 ; gain
MDN1	MDN1, midasin homolog (yeast)	0.138889	AC=1;AF=0.500;AN=2;BaseQRankSum=-9.963;DP=500;Dels=0.00;EFF=NON_SYNONYMOUS_CODING(MODERATE|MISSENSE|Gat/Aat|D4775N|5596|MDN1||CODING|NM_014611.1|86|1);FS=13.177;HaplotypeScore=6.0426;MLEAC=1;MLEAF=0.500;MQ=60.00;MQ0=0;MQRankSum=0.268;QD=13.68;ReadPosRankSum=1.644	chr6.90353230-90529442 ; 6q15 ; gain
MED12L	mediator complex subunit 12-like	0.166667	AC=1;AF=0.500;AN=2;BaseQRankSum=8.981;DP=500;Dels=0.00;EFF=INTRON(MODIFIER||||2145|MED12L||CODING|NM_053002.4|14|1),NON_SYNONYMOUS_CODING(MODERATE|MISSENSE|Acc/Gcc|T259A|319|GPR171||CODING|NM_013308.3|3|1);FS=2.860;HaplotypeScore=1.7608;MLEAC=1;MLEAF=0.500;MQ=60.00;MQ0=0;MQRankSum=-1.032;QD=12.37;ReadPosRankSum=1.884	chr3.150804675-151154465 ; 3q25.1 ; gain
MED13L	mediator complex subunit 13-like	0.111111	AC=1;AF=0.500;AN=2;BaseQRankSum=11.343;DP=500;Dels=0.00;EFF=NON_SYNONYMOUS_CODING(MODERATE|MISSENSE|Gtg/Ttg|V1119L|2210|MED13L||CODING|NM_015335.4|17|1);FS=13.904;HaplotypeScore=7.2897;MLEAC=1;MLEAF=0.500;MQ=60.00;MQ0=0;MQRankSum=-0.819;QD=12.35;ReadPosRankSum=-0.812	chr12.116396380-116714991 ; 12q24.21 ; gain
MED17	mediator complex subunit 17	0.0833333	AC=1;AF=0.500;AN=2;BaseQRankSum=-9.551;DP=500;Dels=0.00;EFF=NON_SYNONYMOUS_CODING(MODERATE|MISSENSE|cAg/cGg|Q299R|651|MED17||CODING|NM_004268.4|6|1);FS=6.815;HaplotypeScore=1.9436;MLEAC=1;MLEAF=0.500;MQ=60.00;MQ0=0;MQRankSum=0.661;QD=12.58;ReadPosRankSum=-0.089	chr11.93517404-93546496 ; 11q21 ; gain
MEGF11	multiple EGF-like-domains 11	0.0555556	AC=1;AF=0.500;AN=2;BaseQRankSum=-6.625;DP=477;Dels=0.00;EFF=NON_SYNONYMOUS_CODING(MODERATE|MISSENSE|Ggc/Cgc|G599R|1044|MEGF11||CODING|NM_032445.2|14|1);FS=6.516;HaplotypeScore=6.7635;MLEAC=1;MLEAF=0.500;MQ=59.99;MQ0=0;MQRankSum=1.262;QD=10.97;ReadPosRankSum=-2.354	chr15.66187633-66546075 ; 15q22.31 ; gain
MEIS2	Meis homeobox 2	0.138889	AC=1;AF=0.500;AN=2;BaseQRankSum=-5.668;DP=500;Dels=0.00;EFF=EXON(MODIFIER|||||MEIS2||CODING|NR_051953.1|2|1),NON_SYNONYMOUS_CODING(MODERATE|MISSENSE|atG/atT|M52I|381|MEIS2||CODING|NM_002399.3|2|1),NON_SYNONYMOUS_CODING(MODERATE|MISSENSE|atG/atT|M52I|388|MEIS2||CODING|NM_172315.2|1|1),NON_SYNONYMOUS_CODING(MODERATE|MISSENSE|atG/atT|M65I|394|MEIS2||CODING|NM_170674.4|2|1),NON_SYNONYMOUS_CODING(MODE…	chr15.37183221-37393500 ; 15q14 ; gain
METTL13	methyltransferase like 13	0.25	AC=2;AF=1.00;AN=2;BaseQRankSum=-1.908;DB;DP=500;Dels=0.00;EFF=NON_SYNONYMOUS_CODING(MODERATE|MISSENSE|atG/atA|M203I|543|METTL13||CODING|NM_001007239.1|3|1),NON_SYNONYMOUS_CODING(MODERATE|MISSENSE|atG/atA|M273I|613|METTL13||CODING|NM_014955.2|3|1),NON_SYNONYMOUS_CODING(MODERATE|MISSENSE|atG/atA|M359I|699|METTL13||CODING|NM_015935.4|3|1);FS=3.173;HaplotypeScore=4.3601;MLEAC=2;MLEAF=1.00;MQ=60.00;MQ…	chr1.171750760-171766856 ; 1q24.3 ; gain
MFAP5	microfibrillar associated protein 5	0.0833333	AC=1;AF=0.500;AN=2;BaseQRankSum=11.370;DP=500;Dels=0.00;EFF=NON_SYNONYMOUS_CODING(MODERATE|MISSENSE|cGg/cAg|R99Q|173|MFAP5||CODING|NM_003480.2|8|1);FS=11.305;HaplotypeScore=4.3448;MLEAC=1;MLEAF=0.500;MQ=59.97;MQ0=0;MQRankSum=-0.877;QD=14.23;ReadPosRankSum=-1.985	chr12.8798539-8815433 ; 12p13.31 ; gain
MFRP	membrane frizzled-related protein	0.111111	AC=1;AF=0.500;AN=2;BaseQRankSum=0.964;DP=500;Dels=0.00;EFF=NON_SYNONYMOUS_CODING(MODERATE|MISSENSE|tCg/tTg|S16L|579|MFRP||CODING|NM_031433.2|1|1),START_GAINED(LOW||||243|C1QTNF5||CODING|NM_015645.3|1|1);FS=3.311;HaplotypeScore=2.6093;MLEAC=1;MLEAF=0.500;MQ=60.00;MQ0=0;MQRankSum=-0.090;QD=13.59;ReadPosRankSum=-0.239	chr11.119209651-119217383 ; 11q23.3 ; gain
MGAM	maltase-glucoamylase (alpha-glucosidase)	0.0555556	NA	chr7.141695678-141806547 ; 7q34 ; loss
MIA2	melanoma inhibitory activity 2	0.305556	AC=1;AF=0.500;AN=2;BaseQRankSum=-1.267;DB;DP=500;Dels=0.00;EFF=NON_SYNONYMOUS_CODING(MODERATE|MISSENSE|Gat/Cat|D547H|654|MIA2||CODING|NM_054024.3|5|1);FS=3.288;HaplotypeScore=1.7262;MLEAC=1;MLEAF=0.500;MQ=60.00;MQ0=0;MQRankSum=-0.477;QD=14.80;ReadPosRankSum=-0.631	chr14.39703124-39722575 ; 14q21.1 ; gain
MKI67IP	MKI67 (FHA domain) interacting nucleolar phosphoprotein	0.111111	NA	chr2.122484520-122494503 ; 2q14.3 ; gain
MKL1	megakaryoblastic leukemia (translocation) 1	0.5	AC=1;AF=0.500;AN=2;BaseQRankSum=-10.360;DB;DP=500;Dels=0.00;EFF=NON_SYNONYMOUS_CODING(MODERATE|MISSENSE|Agc/Ggc|S648G|931|MKL1||CODING|NM_020831.3|12|1);FS=0.000;HaplotypeScore=3.9740;MLEAC=1;MLEAF=0.500;MQ=60.00;MQ0=0;MQRankSum=-0.837;QD=10.28;ReadPosRankSum=1.597	chr22.40806291-41032690 ; 22q13.1 ; loss
MKRN3	makorin ring finger protein 3	0.194444	AC=1;AF=0.500;AN=2;BaseQRankSum=2.277;DP=500;Dels=0.00;EFF=NON_SYNONYMOUS_CODING(MODERATE|MISSENSE|cGt/cTt|R254L|507|MKRN3||CODING|NM_005664.3|1|1),UPSTREAM(MODIFIER|||||MIR4508||NON_CODING|NR_039731.1||1);FS=1.527;HaplotypeScore=7.3092;MLEAC=1;MLEAF=0.500;MQ=59.96;MQ0=0;MQRankSum=-0.226;QD=10.89;ReadPosRankSum=-0.870	chr15.23810453-23813166 ; 15q11.2 ; gain
MLH1	mutL homolog 1, colon cancer, nonpolyposis type 2 (E. coli)	0.388889	AC=1;AF=0.500;AN=2;BaseQRankSum=-2.459;DB;DP=500;Dels=0.00;EFF=NON_SYNONYMOUS_CODING(MODERATE|MISSENSE|Atc/Gtc|I121V|658|MLH1||CODING|NM_001167617.1|8|1),NON_SYNONYMOUS_CODING(MODERATE|MISSENSE|Atc/Gtc|I219V|687|MLH1||CODING|NM_001258271.1|8|1),NON_SYNONYMOUS_CODING(MODERATE|MISSENSE|Atc/Gtc|I219V|756|MLH1||CODING|NM_000249.3|8|1),START_GAINED(LOW||||515|MLH1||CODING|NM_001167618.1|8|1),START_GAI…	chr3.37034840-37092337 ; 3p22.2 ; gain
MLL	myeloid/lymphoid or mixed-lineage leukemia (trithorax homolog, Drosophila)	0.333333	AC=1;AF=0.500;AN=2;BaseQRankSum=-0.512;DP=500;Dels=0.00;EFF=NON_SYNONYMOUS_CODING(MODERATE|MISSENSE|gaA/gaT|E808D|3969|MLL||CODING|NM_005933.3|3|1),NON_SYNONYMOUS_CODING(MODERATE|MISSENSE|gaA/gaT|E808D|3972|MLL||CODING|NM_001197104.1|3|1);FS=1.106;HaplotypeScore=5.9657;MLEAC=1;MLEAF=0.500;MQ=59.94;MQ0=0;MQRankSum=0.807;QD=8.55;ReadPosRankSum=-0.807 , AC=1;AF=0.500;AN=2;BaseQRankSum=-10.573;DP=500…	chr11.118307204-118397539 ; 11q23.3 ; gain
MMP16	matrix metallopeptidase 16 (membrane-inserted)	0.138889	AC=1;AF=0.500;AN=2;BaseQRankSum=-14.361;DP=500;Dels=0.00;EFF=NON_SYNONYMOUS_CODING(MODERATE|MISSENSE|Cat/Aat|H114N|607|MMP16||CODING|NM_005941.4|3|1);FS=0.454;HaplotypeScore=5.4773;MLEAC=1;MLEAF=0.500;MQ=60.00;MQ0=0;MQRankSum=-0.630;QD=22.45;ReadPosRankSum=1.050	chr8.89049459-89339717 ; 8q21.3 ; gain
MMP27	matrix metallopeptidase 27	0.0555556	AC=1;AF=0.500;AN=2;BaseQRankSum=-5.820;DP=500;Dels=0.00;EFF=NON_SYNONYMOUS_CODING(MODERATE|MISSENSE|cCa/cTa|P247L|513|MMP27||CODING|NM_022122.2|5|1);FS=2.766;HaplotypeScore=3.1982;MLEAC=1;MLEAF=0.500;MQ=60.00;MQ0=0;MQRankSum=-1.572;QD=13.21;ReadPosRankSum=1.312	chr11.102562414-102576468 ; 11q22.2 ; gain
MOB2	HCCA2 protein	0.555556	AC=1;AF=0.500;AN=2;BaseQRankSum=1.353;DB;DP=500;Dels=0.00;EFF=INTRON(MODIFIER||||237|MOB2||CODING|NM_053005.4|1|1),NON_SYNONYMOUS_CODING(MODERATE|MISSENSE|tCc/tGc|S157C|237|KRTAP5-5||CODING|NM_001001480.2|1|1);FS=1.452;HaplotypeScore=14.7865;MLEAC=1;MLEAF=0.500;MQ=50.51;MQ0=11;MQRankSum=-11.548;QD=15.48;ReadPosRankSum=1.597	chr11.1490684-1785501 ; 11p15.5 ; gain
MORF4L1	mortality factor 4; mortality factor 4 like 1	0.25	NA	chr15.79165122-79190081 ; 15q25.1 ; gain
MORN3	MORN repeat containing 3	0.111111	AC=1;AF=0.500;AN=2;BaseQRankSum=1.807;DP=500;Dels=0.00;EFF=NON_SYNONYMOUS_CODING(MODERATE|MISSENSE|Tat/Aat|Y62N|240|MORN3||CODING|NM_173855.4|2|1);FS=9.405;HaplotypeScore=7.1883;MLEAC=1;MLEAF=0.500;MQ=59.99;MQ0=0;MQRankSum=-1.561;QD=13.45;ReadPosRankSum=0.979	chr12.122089292-122107560 ; 12q24.31 ; gain
MPP7	membrane protein, palmitoylated 7 (MAGUK p55 subfamily member 7)	0.0555556	AC=1;AF=0.500;AN=2;BaseQRankSum=-12.490;DP=500;Dels=0.00;EFF=NON_SYNONYMOUS_CODING(MODERATE|MISSENSE|Gca/Aca|A501T|576|MPP7||CODING|NM_173496.3|18|1);FS=9.576;HaplotypeScore=3.7838;MLEAC=1;MLEAF=0.500;MQ=60.00;MQ0=0;MQRankSum=1.730;QD=4.90;ReadPosRankSum=-0.727	chr10.28339922-28571067 ; 10p12.1 ; gain
MR1	major histocompatibility complex, class I-related	0.25	AC=1;AF=0.500;AN=2;BaseQRankSum=0.769;DB;DP=500;Dels=0.00;EFF=NON_SYNONYMOUS_CODING(MODERATE|MISSENSE|cAt/cGt|H39R|214|MR1||CODING|NM_001195035.1|3|1),NON_SYNONYMOUS_CODING(MODERATE|MISSENSE|cAt/cGt|H39R|249|MR1||CODING|NM_001195000.1|3|1),NON_SYNONYMOUS_CODING(MODERATE|MISSENSE|cAt/cGt|H39R|296|MR1||CODING|NM_001194999.1|3|1),NON_SYNONYMOUS_CODING(MODERATE|MISSENSE|cAt/cGt|H39R|341|MR1||CODING|N…	chr1.181002560-181031074 ; 1q25.3 ; loss
MRGPRD	MAS-related GPR, member D	0.0833333	AC=1;AF=0.500;AN=2;BaseQRankSum=8.191;DB;DP=500;Dels=0.00;EFF=NON_SYNONYMOUS_CODING(MODERATE|MISSENSE|aCg/aTg|T117M|321|MRGPRD||CODING|NM_198923.2|1|1);FS=9.741;HaplotypeScore=14.8482;MLEAC=1;MLEAF=0.500;MQ=60.00;MQ0=0;MQRankSum=-0.141;QD=12.48;ReadPosRankSum=-0.959	chr11.68747489-68748455 ; 11q13.3 ; gain
MRPL24	mitochondrial ribosomal protein L24	0.0833333	AC=1;AF=0.500;AN=2;BaseQRankSum=-0.459;DP=500;Dels=0.00;EFF=DOWNSTREAM(MODIFIER||||216|MRPL24||CODING|NM_024540.3||1),DOWNSTREAM(MODIFIER||||216|MRPL24||CODING|NM_145729.2||1),NON_SYNONYMOUS_CODING(MODERATE|MISSENSE|cAg/cTg|Q197L|277|RRNAD1||CODING|NM_001142560.1|5|1),NON_SYNONYMOUS_CODING(MODERATE|MISSENSE|cAg/cTg|Q197L|475|RRNAD1||CODING|NM_015997.3|5|1);FS=0.776;HaplotypeScore=10.5625;MLEAC=1;…	chr1.156707093-156710923 ; 1q23.1 ; gain
MRPL28	mitochondrial ribosomal protein L28	0.111111	NA	chr16.417383-420569 ; 16p13.3 ; gain
MS4A13	membrane-spanning 4-domains, subfamily A, member 13	0.0555556	AC=1;AF=0.500;AN=2;BaseQRankSum=11.647;DP=500;Dels=0.00;EFF=NON_SYNONYMOUS_CODING(MODERATE|MISSENSE|Aaa/Gaa|K22E|112|MS4A13||CODING|NM_001100909.1|3|1),NON_SYNONYMOUS_CODING(MODERATE|MISSENSE|Aaa/Gaa|K22E|152|MS4A13||CODING|NM_001012417.2|3|1);FS=3.473;HaplotypeScore=6.4531;MLEAC=1;MLEAF=0.500;MQ=60.00;MQ0=0;MQRankSum=-0.413;QD=12.67;ReadPosRankSum=-0.289	chr11.60282885-60310191 ; 11q12.2 ; gain
MSL2	male-specific lethal 2 homolog (Drosophila)	0.166667	NA	chr3.135867759-135914688 ; 3q22.3 ; loss
MTAP	methylthioadenosine phosphorylase	0.638889	AC=2;AF=1.00;AN=2;BaseQRankSum=0.629;DB;DP=500;Dels=0.00;EFF=NON_SYNONYMOUS_CODING(MODERATE|MISSENSE|Gtc/Atc|V56I|283|MTAP||CODING|NM_002451.3|3|1);FS=1.444;HaplotypeScore=8.5968;MLEAC=2;MLEAF=1.00;MQ=59.67;MQ0=2;MQRankSum=2.944;QD=33.70;ReadPosRankSum=-0.492	chr9.21802634-21865969 ; 9p21.3 ; gain
MTF2	metal response element binding transcription factor 2	0.166667	NA	chr1.93544791-93604638 ; 1p22.1 ; loss
MTMR3	myotubularin related protein 3	0.0555556	AC=1;AF=0.500;AN=2;BaseQRankSum=-10.207;DP=500;Dels=0.00;EFF=NON_SYNONYMOUS_CODING(MODERATE|MISSENSE|Gag/Aag|E836K|1161|MTMR3||CODING|NM_153051.2|17|1),NON_SYNONYMOUS_CODING(MODERATE|MISSENSE|Gag/Aag|E836K|1170|MTMR3||CODING|NM_153050.2|17|1),NON_SYNONYMOUS_CODING(MODERATE|MISSENSE|Gag/Aag|E836K|1198|MTMR3||CODING|NM_021090.3|17|1);FS=0.324;HaplotypeScore=5.6074;MLEAC=1;MLEAF=0.500;MQ=60.00;MQ0=0…	chr22.30279157-30426857 ; 22q12.2 ; loss
MXD4	MAX dimerization protein 4	0.0555556	NA	chr4.2249159-2263739 ; 4p16.3 ; gain
MYF5	myogenic factor 5	0.111111	AC=2;AF=1.00;AN=2;BaseQRankSum=2.671;DP=500;Dels=0.00;EFF=NON_SYNONYMOUS_CODING(MODERATE|MISSENSE|aTc/aCc|I251T|255|MYF5||CODING|NM_005593.2|3|1);FS=2.348;HaplotypeScore=1.9987;MLEAC=2;MLEAF=1.00;MQ=60.00;MQ0=0;MQRankSum=-0.972;QD=33.31;ReadPosRankSum=-0.235	chr12.81110707-81113447 ; 12q21.31 ; gain
MYF6	myogenic factor 6 (herculin)	0.138889	NA	chr12.81101407-81103256 ; 12q21.31 ; gain
MYH8	myosin, heavy chain 8, skeletal muscle, perinatal	0.0833333	AC=2;AF=1.00;AN=2;BaseQRankSum=-1.907;DP=406;Dels=0.00;EFF=NON_SYNONYMOUS_CODING(MODERATE|MISSENSE|Ctg/Atg|L1684M|1937|MYH8||CODING|NM_002472.2|35|1);FS=2.929;HaplotypeScore=7.5703;MLEAC=2;MLEAF=1.00;MQ=53.55;MQ0=0;MQRankSum=-1.661;QD=30.77;ReadPosRankSum=-0.139	chr17.10293641-10325267 ; 17p13.1 ; gain
MYL2	myosin, light chain 2, regulatory, cardiac, slow	0.111111	AC=1;AF=0.500;AN=2;BaseQRankSum=-1.199;DP=500;Dels=0.00;EFF=DOWNSTREAM(MODIFIER||||166|MYL2||CODING|NM_000432.3||1),NON_SYNONYMOUS_CODING(MODERATE|MISSENSE|cAg/cTg|Q527L|563|CCDC63||CODING|NM_152591.1|12|1);FS=0.693;HaplotypeScore=9.4032;MLEAC=1;MLEAF=0.500;MQ=60.00;MQ0=0;MQRankSum=-1.349;QD=10.97;ReadPosRankSum=-2.004	chr12.111348623-111358404 ; 12q24.11 ; gain
MYLK	myosin light chain kinase	0.0555556	AC=1;AF=0.500;AN=2;BaseQRankSum=-2.793;DP=500;Dels=0.00;EFF=NON_SYNONYMOUS_CODING(MODERATE|MISSENSE|cAa/cTa|Q1036L|1794|MYLK||CODING|NM_053028.3|17|1),NON_SYNONYMOUS_CODING(MODERATE|MISSENSE|cAa/cTa|Q1036L|1845|MYLK||CODING|NM_053026.3|17|1),NON_SYNONYMOUS_CODING(MODERATE|MISSENSE|cAa/cTa|Q1105L|1863|MYLK||CODING|NM_053027.3|18|1),NON_SYNONYMOUS_CODING(MODERATE|MISSENSE|cAa/cTa|Q1105L|1914|MYLK||…	chr3.123331142-123603149 ; 3q21.1 ; gain
MYLK3	myosin light chain kinase 3	0.583333	AC=1;AF=0.500;AN=2;BaseQRankSum=-10.227;DB;DP=500;Dels=0.00;EFF=NON_SYNONYMOUS_CODING(MODERATE|MISSENSE|Gtg/Ttg|V180L|819|MYLK3||CODING|NM_182493.2|2|1);FS=19.142;HaplotypeScore=7.6346;MLEAC=1;MLEAF=0.500;MQ=60.00;MQ0=0;MQRankSum=0.314;QD=12.13;ReadPosRankSum=1.658	chr16.46736193-46782221 ; 16q11.2 ; loss
MYO15A	myosin XVA	0.138889	AC=1;AF=0.500;AN=2;BaseQRankSum=1.587;DP=500;Dels=0.00;EFF=NON_SYNONYMOUS_CODING(MODERATE|MISSENSE|Ggg/Agg|G2309R|3530|MYO15A||CODING|NM_016239.3|32|1);FS=2.949;HaplotypeScore=9.2629;MLEAC=1;MLEAF=0.500;MQ=59.91;MQ0=0;MQRankSum=-0.123;QD=13.98;ReadPosRankSum=-0.052	chr17.18012019-18083116 ; 17p11.2 ; gain
MYOD1	myogenic differentiation 1	0.0555556	AC=1;AF=0.500;AN=2;BaseQRankSum=-4.641;DP=500;Dels=0.00;EFF=NON_SYNONYMOUS_CODING(MODERATE|MISSENSE|Ccg/Acg|P7T|320|MYOD1||CODING|NM_002478.4|1|1);FS=4.567;HaplotypeScore=10.7638;MLEAC=1;MLEAF=0.500;MQ=60.00;MQ0=0;MQRankSum=0.639;QD=4.95;ReadPosRankSum=0.096	chr11.17741109-17743678 ; 11p15.1 ; gain
MYT1	myelin transcription factor 1	0.111111	AC=1;AF=0.500;AN=2;BaseQRankSum=-14.026;DP=500;Dels=0.00;EFF=NON_SYNONYMOUS_CODING(MODERATE|MISSENSE|tGc/tAc|C1083Y|1121|MYT1||CODING|NM_004535.2|23|1);FS=8.590;HaplotypeScore=1.9970;MLEAC=1;MLEAF=0.500;MQ=60.00;MQ0=0;MQRankSum=0.614;QD=20.66;ReadPosRankSum=0.467	chr20.62795826-62873606 ; 20q13.33 ; gain
NARF	nuclear prelamin A recognition factor	0.111111	NA	chr17.80416059-80446143 ; 17q25.3 ; gain
NBAS	neuroblastoma amplified sequence	0.138889	AC=1;AF=0.500;AN=2;BaseQRankSum=8.540;DB;DP=500;Dels=0.00;EFF=EXON(MODIFIER|||||NBAS||CODING|NR_052013.2|47|1),NON_SYNONYMOUS_CODING(MODERATE|MISSENSE|Gcc/Acc|A2074T|2371|NBAS||CODING|NM_015909.3|47|1);FS=8.954;HaplotypeScore=8.4372;MLEAC=1;MLEAF=0.500;MQ=60.00;MQ0=0;MQRankSum=0.310;QD=12.63;ReadPosRankSum=-0.285	chr2.15307031-15701472 ; 2p24.3 ; gain
NBEA	neurobeachin	0.194444	AC=1;AF=0.500;AN=2;BaseQRankSum=1.859;DP=468;Dels=0.00;EFF=INTRON(MODIFIER||||2946|NBEA||CODING|NM_015678.4|41|1),INTRON(MODIFIER|||||MIR548F5||NON_CODING|NR_031646.1|4|1),NON_SYNONYMOUS_CODING(MODERATE|MISSENSE|Ggg/Agg|G244R|359|MAB21L1||CODING|NM_005584.4|1|1),UPSTREAM(MODIFIER||||739|NBEA||CODING|NM_001204197.1||1);FS=1.086;HaplotypeScore=10.2946;MLEAC=1;MLEAF=0.500;MQ=59.91;MQ0=0;MQRankSum=1.…	chr13.35516423-36246874 ; 13q13.3 ; gain
NCOA2	nuclear receptor coactivator 2	0.111111	AC=1;AF=0.500;AN=2;BaseQRankSum=1.684;DB;DP=500;Dels=0.00;EFF=NON_SYNONYMOUS_CODING(MODERATE|MISSENSE|caT/caA|H449Q|1464|NCOA2||CODING|NM_006540.2|11|1);FS=8.545;HaplotypeScore=7.1323;MLEAC=1;MLEAF=0.500;MQ=60.00;MQ0=0;MQRankSum=-0.965;QD=17.49;ReadPosRankSum=-1.107	chr8.71024266-71316020 ; 8q13.3 ; gain
NCSTN	nicastrin	0.166667	AC=2;AF=1.00;AN=2;BaseQRankSum=-2.766;DB;DP=500;Dels=0.00;EFF=NON_SYNONYMOUS_CODING(MODERATE|MISSENSE|Aat/Tat|N417Y|709|NCSTN||CODING|NM_015331.2|11|1);FS=1.004;HaplotypeScore=4.4791;MLEAC=2;MLEAF=1.00;MQ=60.00;MQ0=0;MQRankSum=-0.837;QD=31.44;ReadPosRankSum=0.091	chr1.160313062-160328742 ; 1q23.2 ; gain
NDN	necdin homolog (mouse)	0.138889	AC=1;AF=0.500;AN=2;BaseQRankSum=-4.720;DP=500;Dels=0.00;EFF=NON_SYNONYMOUS_CODING(MODERATE|MISSENSE|agG/agT|R178S|321|NDN||CODING|NM_002487.2|1|1);FS=13.660;HaplotypeScore=9.8558;MLEAC=1;MLEAF=0.500;MQ=60.00;MQ0=0;MQRankSum=-0.437;QD=8.51;ReadPosRankSum=0.458	chr15.23930553-23932450 ; 15q11.2 ; gain
NDUFAF3	NADH dehydrogenase (ubiquinone) 1 alpha subcomplex, assembly factor 3	0.0833333	AC=2;AF=1.00;AN=2;BaseQRankSum=1.177;DP=500;Dels=0.00;EFF=DOWNSTREAM(MODIFIER||||127|NDUFAF3||CODING|NM_199070.1||1),DOWNSTREAM(MODIFIER||||127|NDUFAF3||CODING|NM_199073.1||1),DOWNSTREAM(MODIFIER||||127|NDUFAF3||CODING|NM_199074.1||1),DOWNSTREAM(MODIFIER||||184|NDUFAF3||CODING|NM_199069.1||1),DOWNSTREAM(MODIFIER||||776|QRICH1||CODING|NM_017730.2||1),DOWNSTREAM(MODIFIER||||776|QRICH1||CODING|NM_19…	chr3.49057907-49060926 ; 3p21.31 ; gain
NDUFC2	NADH dehydrogenase (ubiquinone) 1, subcomplex unknown, 2, 14.5kDa	0.0555556	AC=1;AF=0.500;AN=2;BaseQRankSum=5.128;DB;DP=500;Dels=0.00;EFF=DOWNSTREAM(MODIFIER||||119|NDUFC2||CODING|NM_004549.5||1),DOWNSTREAM(MODIFIER||||88|NDUFC2||CODING|NM_001204054.1||1),DOWNSTREAM(MODIFIER||||96|NDUFC2||CODING|NM_001204055.1||1),INTRON(MODIFIER||||114|NDUFC2-KCTD14||CODING|NM_001203261.1|2|1),INTRON(MODIFIER||||134|NDUFC2-KCTD14||CODING|NM_001203260.1|2|1),INTRON(MODIFIER||||86|NDUFC2-…	chr11.77779392-77791265 ; 11q14.1 ; gain
NEB	nebulin	0.416667	AC=1;AF=0.500;AN=2;BaseQRankSum=6.137;DB;DP=500;Dels=0.00;EFF=NON_SYNONYMOUS_CODING(MODERATE|MISSENSE|Tcc/Ccc|S2912P|6657|NEB||CODING|NM_004543.4|62|1),NON_SYNONYMOUS_CODING(MODERATE|MISSENSE|Tcc/Ccc|S2912P|8525|NEB||CODING|NM_001164507.1|62|1),NON_SYNONYMOUS_CODING(MODERATE|MISSENSE|Tcc/Ccc|S2912P|8525|NEB||CODING|NM_001164508.1|62|1),NON_SYNONYMOUS_CODING(MODERATE|MISSENSE|Tcc/Ccc|S2912P|8560|N…	chr2.152341852-152591001 ; 2q23.3 ; gain
NEFM	neurofilament, medium polypeptide	0.138889	AC=1;AF=0.500;AN=2;BaseQRankSum=-2.943;DP=500;Dels=0.00;EFF=NON_SYNONYMOUS_CODING(MODERATE|MISSENSE|Cag/Gag|Q124E|916|NEFM||CODING|NM_005382.2|1|1),UPSTREAM(MODIFIER||||540|NEFM||CODING|NM_001105541.1||1);FS=10.645;HaplotypeScore=6.8263;MLEAC=1;MLEAF=0.500;MQ=60.00;MQ0=0;MQRankSum=-0.806;QD=12.98;ReadPosRankSum=-0.529	chr8.24771273-24776606 ; 8p21.2 ; gain
NES	nestin	0.111111	AC=1;AF=0.500;AN=2;BaseQRankSum=-2.732;DP=500;Dels=0.00;EFF=NON_SYNONYMOUS_CODING(MODERATE|MISSENSE|cCc/cAc|P1221H|1621|NES||CODING|NM_006617.1|4|1);FS=0.346;HaplotypeScore=15.1987;MLEAC=1;MLEAF=0.500;MQ=60.00;MQ0=0;MQRankSum=1.767;QD=19.68;ReadPosRankSum=0.665	chr1.156638555-156647189 ; 1q23.1 ; gain
NEU3	sialidase 3 (membrane sialidase)	0.0555556	AC=1;AF=0.500;AN=2;BaseQRankSum=7.550;DP=500;Dels=0.00;EFF=NON_SYNONYMOUS_CODING(MODERATE|MISSENSE|gAc/gGc|D291G|461|NEU3||CODING|NM_006656.5|3|1);FS=1.045;HaplotypeScore=9.9138;MLEAC=1;MLEAF=0.500;MQ=59.94;MQ0=0;MQRankSum=0.464;QD=13.84;ReadPosRankSum=-0.146	chr11.74699949-74718743 ; 11q13.4 ; gain
NFE2L2	nuclear factor (erythroid-derived 2)-like 2	0.138889	AC=1;AF=0.500;AN=2;BaseQRankSum=-5.981;DP=500;Dels=0.00;EFF=NON_SYNONYMOUS_CODING(MODERATE|MISSENSE|Tgg/Agg|W24R|605|NFE2L2||CODING|NM_006164.4|2|1),NON_SYNONYMOUS_CODING(MODERATE|MISSENSE|Tgg/Agg|W8R|582|NFE2L2||CODING|NM_001145413.2|2|1),NON_SYNONYMOUS_CODING(MODERATE|MISSENSE|Tgg/Agg|W8R|589|NFE2L2||CODING|NM_001145412.2|2|1);FS=3.406;HaplotypeScore=5.8320;MLEAC=1;MLEAF=0.500;MQ=60.00;MQ0=0;MQ…	chr2.178095030-178129859 ; 2q31.2 ; gain
NFYB	nuclear transcription factor Y, beta	0.111111	AC=1;AF=0.500;AN=2;BaseQRankSum=-9.290;DP=500;Dels=0.00;EFF=NON_SYNONYMOUS_CODING(MODERATE|MISSENSE|Ggc/Agc|G177S|207|NFYB||CODING|NM_006166.3|7|1);FS=0.695;HaplotypeScore=2.9969;MLEAC=1;MLEAF=0.500;MQ=60.00;MQ0=0;MQRankSum=-0.063;QD=14.14;ReadPosRankSum=2.422	chr12.104510857-104532040 ; 12q23.3 ; gain
NGFR	nerve growth factor receptor (TNFR superfamily, member 16)	0.0833333	AC=2;AF=1.00;AN=2;BaseQRankSum=0.206;DB;DP=500;Dels=0.00;EFF=NON_SYNONYMOUS_CODING(MODERATE|MISSENSE|tCg/tTg|S205L|427|NGFR||CODING|NM_002507.3|4|1);FS=0.000;HaplotypeScore=12.6380;MLEAC=2;MLEAF=1.00;MQ=60.00;MQ0=0;MQRankSum=-0.344;QD=32.45;ReadPosRankSum=0.909	chr17.47572654-47592382 ; 17q21.33 ; loss
NGLY1	N-glycanase 1	0.0555556	AC=2;AF=1.00;AN=2;BaseQRankSum=-1.219;DP=500;Dels=0.00;EFF=NON_SYNONYMOUS_CODING(MODERATE|MISSENSE|aGa/aAa|R387K|612|NGLY1||CODING|NM_001145294.1|9|1),NON_SYNONYMOUS_CODING(MODERATE|MISSENSE|aGa/aAa|R411K|636|NGLY1||CODING|NM_001145293.1|9|1),NON_SYNONYMOUS_CODING(MODERATE|MISSENSE|aGa/aAa|R429K|558|NGLY1||CODING|NM_001145295.1|9|1),NON_SYNONYMOUS_CODING(MODERATE|MISSENSE|aGa/aAa|R429K|654|NGLY1|…	chr3.25760434-25831530 ; 3p24.2 ; gain
NIN	ninein (GSK3B interacting protein)	0.111111	NA	chr14.51186480-51297839 ; 14q22.1 ; gain
NLRC5	NLR family, CARD domain containing 5	0.0833333	AC=1;AF=0.500;AN=2;BaseQRankSum=-1.738;DP=500;Dels=0.00;EFF=NON_SYNONYMOUS_CODING(MODERATE|MISSENSE|gaG/gaC|E1041D|1866|NLRC5||CODING|NM_032206.4|19|1);FS=2.396;HaplotypeScore=3.3647;MLEAC=1;MLEAF=0.500;MQ=60.00;MQ0=0;MQRankSum=-0.916;QD=13.62;ReadPosRankSum=1.127	chr16.57050985-57117436 ; 16q13 ; gain
NLRP3	NLR family, pyrin domain containing 3	0.0833333	AC=1;AF=0.500;AN=2;BaseQRankSum=-5.546;DP=404;Dels=0.00;EFF=NON_SYNONYMOUS_CODING(MODERATE|MISSENSE|Ggg/Tgg|G454W|1034|NLRP3||CODING|NM_001243133.1|3|1),NON_SYNONYMOUS_CODING(MODERATE|MISSENSE|Ggg/Tgg|G456W|1036|NLRP3||CODING|NM_001079821.2|5|1),NON_SYNONYMOUS_CODING(MODERATE|MISSENSE|Ggg/Tgg|G456W|1036|NLRP3||CODING|NM_004895.4|3|1),NON_SYNONYMOUS_CODING(MODERATE|MISSENSE|Ggg/Tgg|G456W|922|NLRP3…	chr1.247579457-247612406 ; 1q44 ; loss
NLRP4	NLR family, pyrin domain containing 4	0.166667	AC=1;AF=0.500;AN=2;BaseQRankSum=-12.942;DP=500;Dels=0.00;EFF=NON_SYNONYMOUS_CODING(MODERATE|MISSENSE|tCa/tTa|S840L|994|NLRP4||CODING|NM_134444.4|7|1);FS=0.322;HaplotypeScore=2.5279;MLEAC=1;MLEAF=0.500;MQ=60.00;MQ0=0;MQRankSum=0.943;QD=13.56;ReadPosRankSum=-1.039	chr19.56347943-56393220 ; 19q13.43 ; gain
NLRP5	NLR family, pyrin domain containing 5	0.166667	NA	chr19.56511091-56573174 ; 19q13.43 ; gain
NMS	neuromedin S	0.361111	AC=1;AF=0.500;AN=2;BaseQRankSum=-5.521;DB;DP=500;Dels=0.00;EFF=NON_SYNONYMOUS_CODING(MODERATE|MISSENSE|Ccc/Tcc|P6S|153|NMS||CODING|NM_001011717.1|1|1);FS=12.524;HaplotypeScore=4.8540;MLEAC=1;MLEAF=0.500;MQ=59.94;MQ0=1;MQRankSum=1.740;QD=3.71;ReadPosRankSum=0.550	chr2.101086943-101099742 ; 2q11.2 ; loss
NOP10	NOP10 ribonucleoprotein homolog (yeast)	0.111111	AC=1;AF=0.500;AN=2;BaseQRankSum=-1.504;DP=500;Dels=0.00;EFF=NON_SYNONYMOUS_CODING(MODERATE|MISSENSE|Tgc/Agc|C28S|64|NOP10||CODING|NM_018648.3|2|1),UPSTREAM(MODIFIER||||1091|SLC12A6||CODING|NM_001042494.1||1),UPSTREAM(MODIFIER||||1091|SLC12A6||CODING|NM_001042495.1||1),UPSTREAM(MODIFIER||||1132|C15orf55||CODING|NM_175741.1||1),UPSTREAM(MODIFIER||||1141|SLC12A6||CODING|NM_001042496.1||1);FS=6.571;H…	chr15.34633916-34635362 ; 15q14 ; gain
NOX4	NADPH oxidase 4	0.0833333	AC=1;AF=0.500;AN=2;BaseQRankSum=-1.119;DP=500;Dels=0.00;EFF=EXON(MODIFIER|||||NOX4||CODING|NR_026571.1|14|1),INTRON(MODIFIER||||538|NOX4||CODING|NM_001143836.1|13|1),NON_SYNONYMOUS_CODING(MODERATE|MISSENSE|cCt/cTt|P388L|554|NOX4||CODING|NM_001143837.1|17|1),NON_SYNONYMOUS_CODING(MODERATE|MISSENSE|cCt/cTt|P412L|578|NOX4||CODING|NM_016931.3|14|1);FS=7.046;HaplotypeScore=6.3199;MLEAC=1;MLEAF=0.500;M…	chr11.89057521-89322779 ; 11q14.3 ; gain
NPC1	Niemann-Pick disease, type C1	0.0555556	AC=1;AF=0.500;AN=2;BaseQRankSum=-1.961;DB;DP=500;Dels=0.00;EFF=NON_SYNONYMOUS_CODING(MODERATE|MISSENSE|tCg/tTg|S425L|1278|NPC1||CODING|NM_000271.4|8|1);FS=7.195;HaplotypeScore=3.5468;MLEAC=1;MLEAF=0.500;MQ=60.00;MQ0=0;MQRankSum=-0.342;QD=12.74;ReadPosRankSum=1.427	chr18.21111462-21166581 ; 18q11.2 ; gain
NQO1	NAD(P)H dehydrogenase, quinone 1	0.388889	AC=1;AF=0.500;AN=2;BaseQRankSum=-5.567;DB;DP=500;Dels=0.00;EFF=NON_SYNONYMOUS_CODING(MODERATE|MISSENSE|Cct/Tct|P149S|236|NQO1||CODING|NM_001025434.1|5|1),NON_SYNONYMOUS_CODING(MODERATE|MISSENSE|Cct/Tct|P153S|240|NQO1||CODING|NM_001025433.1|5|1),NON_SYNONYMOUS_CODING(MODERATE|MISSENSE|Cct/Tct|P187S|274|NQO1||CODING|NM_000903.2|6|1);FS=24.207;HaplotypeScore=4.4692;MLEAC=1;MLEAF=0.500;MQ=60.00;MQ0=0…	chr16.69743303-69760533 ; 16q22.1 ; gain
NRAP	nebulin-related anchoring protein	0.75	AC=1;AF=0.500;AN=2;BaseQRankSum=-11.375;DB;DP=500;Dels=0.00;EFF=NON_SYNONYMOUS_CODING(MODERATE|MISSENSE|Att/Gtt|I1148V|1695|NRAP||CODING|NM_006175.4|30|1),NON_SYNONYMOUS_CODING(MODERATE|MISSENSE|Att/Gtt|I1183V|1730|NRAP||CODING|NM_198060.3|31|1),NON_SYNONYMOUS_CODING(MODERATE|MISSENSE|Att/Gtt|I1183V|1731|NRAP||CODING|NM_001261463.1|31|1);FS=0.702;HaplotypeScore=3.7968;MLEAC=1;MLEAF=0.500;MQ=59.98…	chr10.115348582-115423829 ; 10q25.3 ; gain
NSFL1C	NSFL1 (p97) cofactor (p47)	0.0555556	NA	chr20.1422806-1448337 ; 20p13 ; gain
NTNG1	netrin G1	0.388889	AC=1;AF=0.500;AN=2;BaseQRankSum=-10.584;DP=500;Dels=0.00;EFF=NON_SYNONYMOUS_CODING(MODERATE|MISSENSE|Ccg/Acg|P68T|438|NTNG1||CODING|NM_014917.2|2|1),NON_SYNONYMOUS_CODING(MODERATE|MISSENSE|Ccg/Acg|P68T|480|NTNG1||CODING|NM_001113228.1|2|1),NON_SYNONYMOUS_CODING(MODERATE|MISSENSE|Ccg/Acg|P68T|539|NTNG1||CODING|NM_001113226.1|2|1);FS=13.427;HaplotypeScore=18.2604;MLEAC=1;MLEAF=0.500;MQ=59.83;MQ0=0;…	chr1.107682628-108024475 ; 1p13.3 ; gain
NTRK3	neurotrophic tyrosine kinase, receptor, type 3	0.138889	AC=1;AF=0.500;AN=2;BaseQRankSum=-2.391;DP=500;Dels=0.00;EFF=NON_SYNONYMOUS_CODING(MODERATE|MISSENSE|Cgg/Tgg|R343W|612|NTRK3||CODING|NM_001007156.2|10|1),NON_SYNONYMOUS_CODING(MODERATE|MISSENSE|Cgg/Tgg|R343W|817|NTRK3||CODING|NM_001243101.1|10|1),NON_SYNONYMOUS_CODING(MODERATE|MISSENSE|Cgg/Tgg|R343W|825|NTRK3||CODING|NM_002530.3|10|1),NON_SYNONYMOUS_CODING(MODERATE|MISSENSE|Cgg/Tgg|R343W|839|NTRK3…	chr15.88419987-88799962 ; 15q25.3 ; gain
NTSR1	neurotensin receptor 1 (high affinity)	0.0833333	AC=1;AF=0.500;AN=2;BaseQRankSum=-2.427;DP=500;Dels=0.00;EFF=NON_SYNONYMOUS_CODING(MODERATE|MISSENSE|Gcc/Tcc|A68S|418|NTSR1||CODING|NM_002531.2|1|1);FS=9.934;HaplotypeScore=11.5105;MLEAC=1;MLEAF=0.500;MQ=60.00;MQ0=0;MQRankSum=0.253;QD=24.95;ReadPosRankSum=-1.290	chr20.61340188-61394123 ; 20q13.33 ; gain
NUDT6	nudix (nucleoside diphosphate linked moiety X)-type motif 6	0.194444	AC=1;AF=0.500;AN=2;BaseQRankSum=15.363;DB;DP=500;Dels=0.00;EFF=NON_SYNONYMOUS_CODING(MODERATE|MISSENSE|cGg/cAg|R209Q|316|NUDT6||CODING|NM_007083.4|5|1),NON_SYNONYMOUS_CODING(MODERATE|MISSENSE|cGg/cAg|R40Q|147|NUDT6||CODING|NM_198041.2|5|1),UTR_3_PRIME(MODIFIER||||288|FGF2||CODING|NM_002006.4|3|1);FS=6.932;HaplotypeScore=5.2666;MLEAC=1;MLEAF=0.500;MQ=60.00;MQ0=0;MQRankSum=1.134;QD=12.80;ReadPosRan…	chr4.123813798-123844159 ; 4q28.1 ; loss
NUDT9	nudix (nucleoside diphosphate linked moiety X)-type motif 9	0.0555556	AC=1;AF=0.500;AN=2;BaseQRankSum=-9.359;DP=500;Dels=0.00;EFF=INTRON(MODIFIER||||300|NUDT9||CODING|NM_198038.2|1|1),NON_SYNONYMOUS_CODING(MODERATE|MISSENSE|Ctc/Ttc|L15F|318|NUDT9||CODING|NM_001248011.1|1|1),NON_SYNONYMOUS_CODING(MODERATE|MISSENSE|Ctc/Ttc|L15F|350|NUDT9||CODING|NM_024047.4|1|1);FS=1.872;HaplotypeScore=11.2658;MLEAC=1;MLEAF=0.500;MQ=60.00;MQ0=0;MQRankSum=-0.768;QD=12.35;ReadPosRankSu…	chr4.88343727-88380606 ; 4q22.1 ; gain
NUP210	nucleoporin 210kDa	0.0555556	AC=1;AF=0.500;AN=2;BaseQRankSum=8.703;DP=500;Dels=0.00;EFF=NON_SYNONYMOUS_CODING(MODERATE|MISSENSE|cGc/cTc|R1789L|1887|NUP210||CODING|NM_024923.2|37|1);FS=1.046;HaplotypeScore=14.3410;MLEAC=1;MLEAF=0.500;MQ=60.00;MQ0=0;MQRankSum=-0.046;QD=12.92;ReadPosRankSum=-0.452	chr3.13357736-13461809 ; 3p25.1 ; gain
NXF1	nuclear RNA export factor 1	0.0555556	AC=1;AF=0.500;AN=2;BaseQRankSum=3.021;DP=500;Dels=0.00;EFF=NON_SYNONYMOUS_CODING(MODERATE|MISSENSE|Ttg/Atg|L469M|619|NXF1||CODING|NM_006362.4|16|1),UPSTREAM(MODIFIER||||202|TMEM223||CODING|NM_001080501.2||1),UTR_3_PRIME(MODIFIER||||356|NXF1||CODING|NM_001081491.1|15|1);FS=0.331;HaplotypeScore=5.6118;MLEAC=1;MLEAF=0.500;MQ=60.00;MQ0=0;MQRankSum=-0.848;QD=11.62;ReadPosRankSum=1.928	chr11.62559597-62572964 ; 11q12.3 ; gain
OR10H4	olfactory receptor, family 10, subfamily H, member 4	0.305556	AC=1;AF=0.500;AN=2;BaseQRankSum=3.072;DB;DP=500;Dels=0.00;EFF=NON_SYNONYMOUS_CODING(MODERATE|MISSENSE|cAt/cGt|H144R|316|OR10H4||CODING|NM_001004465.1|1|1);FS=5.745;HaplotypeScore=6.6497;MLEAC=1;MLEAF=0.500;MQ=60.00;MQ0=0;MQRankSum=0.409;QD=13.31;ReadPosRankSum=1.094	chr19.16059817-16060768 ; 19p13.12 ; loss
OR10K2	olfactory receptor, family 10, subfamily K, member 2	0.111111	AC=1;AF=0.500;AN=2;BaseQRankSum=-4.860;DP=500;Dels=0.00;EFF=NON_SYNONYMOUS_CODING(MODERATE|MISSENSE|gGt/gTt|G233V|312|OR10K2||CODING|NM_001004476.1|1|1);FS=6.248;HaplotypeScore=5.4303;MLEAC=1;MLEAF=0.500;MQ=60.00;MQ0=0;MQRankSum=1.094;QD=15.44;ReadPosRankSum=1.694	chr1.158389717-158390656 ; 1q23.1 ; gain
OR10R2	olfactory receptor, family 10, subfamily R, member 2	0.75	AC=1;AF=0.500;AN=2;BaseQRankSum=-4.398;DB;DP=500;Dels=0.00;EFF=NON_SYNONYMOUS_CODING(MODERATE|MISSENSE|Gaa/Aaa|E31K|335|OR10R2||CODING|NM_001004472.1|1|1);FS=1.140;HaplotypeScore=5.6574;MLEAC=1;MLEAF=0.500;MQ=60.00;MQ0=0;MQRankSum=1.638;QD=13.05;ReadPosRankSum=-0.923 , AC=1;AF=0.500;AN=2;BaseQRankSum=7.698;DB;DP=500;Dels=0.00;EFF=NON_SYNONYMOUS_CODING(MODERATE|MISSENSE|gAa/gGa|E216G|335|OR10R2||C…	chr1.158449667-158450675 ; 1q23.1 ; gain
OR13A1	olfactory receptor, family 13, subfamily A, member 1	0.111111	AC=1;AF=0.500;AN=2;BaseQRankSum=-6.029;DP=253;Dels=0.00;EFF=NON_SYNONYMOUS_CODING(MODERATE|MISSENSE|Gtg/Ttg|V157L|328|OR13A1||CODING|NM_001004297.2|4|1);FS=1.008;HaplotypeScore=2.5619;MLEAC=1;MLEAF=0.500;MQ=60.00;MQ0=0;MQRankSum=1.271;QD=15.38;ReadPosRankSum=-0.884	chr10.45798101-45811056 ; 10q11.21 ; gain
OR13C2	olfactory receptor, family 13, subfamily C, member 2	0.0833333	NA	chr9.107366951-107367908 ; 9q31.1 ; loss
OR13C5	olfactory receptor, family 13, subfamily C, member 5	0.0555556	AC=1;AF=0.500;AN=2;BaseQRankSum=9.030;DB;DP=500;Dels=0.00;EFF=NON_SYNONYMOUS_CODING(MODERATE|MISSENSE|Gtg/Atg|V117M|318|OR13C5||CODING|NM_001004482.1|1|1);FS=3.095;HaplotypeScore=7.0338;MLEAC=1;MLEAF=0.500;MQ=46.69;MQ0=50;MQRankSum=-14.480;QD=1.70;ReadPosRankSum=0.901	chr9.107360737-107361694 ; 9q31.1 ; loss
OR13D1	olfactory receptor, family 13, subfamily D, member 1	0.0555556	AC=1;AF=0.500;AN=2;BaseQRankSum=-2.480;DP=500;Dels=0.00;EFF=NON_SYNONYMOUS_CODING(MODERATE|MISSENSE|Cca/Aca|P161T|346|OR13D1||CODING|NM_001004484.1|1|1);FS=31.370;HaplotypeScore=15.8854;MLEAC=1;MLEAF=0.500;MQ=47.36;MQ0=0;MQRankSum=8.412;QD=2.42;ReadPosRankSum=1.027	chr9.107456702-107457743 ; 9q31.1 ; loss
OR13F1	olfactory receptor, family 13, subfamily F, member 1	0.0833333	AC=2;AF=1.00;AN=2;BaseQRankSum=0.680;DB;DP=500;Dels=0.00;EFF=NON_SYNONYMOUS_CODING(MODERATE|MISSENSE|tGc/tAc|C97Y|319|OR13F1||CODING|NM_001004485.1|1|1);FS=2.295;HaplotypeScore=16.2527;MLEAC=2;MLEAF=1.00;MQ=59.95;MQ0=0;MQRankSum=0.816;QD=32.64;ReadPosRankSum=0.680	chr9.107266543-107267503 ; 9q31.1 ; loss
OR14C36	olfactory receptor, family 14, subfamily C, member 36	0.611111	AC=2;AF=1.00;AN=2;BaseQRankSum=-0.743;DB;DP=500;Dels=0.00;EFF=NON_SYNONYMOUS_CODING(MODERATE|MISSENSE|Ggg/Agg|G225R|312|OR14C36||CODING|NM_001001918.1|1|1);FS=0.000;HaplotypeScore=5.4287;MLEAC=2;MLEAF=1.00;MQ=60.00;MQ0=0;MQRankSum=-0.344;QD=34.81;ReadPosRankSum=0.722 , AC=2;AF=1.00;AN=2;BaseQRankSum=-1.676;DB;DP=500;Dels=0.00;EFF=NON_SYNONYMOUS_CODING(MODERATE|MISSENSE|Gac/Tac|D231Y|312|OR14C36||…	chr1.248512076-248513015 ; 1q44 ; loss
OR1F1	olfactory receptor, family 1, subfamily F, member 1	0.583333	AC=1;AF=0.500;AN=2;BaseQRankSum=8.783;DB;DP=500;Dels=0.00;EFF=NON_SYNONYMOUS_CODING(MODERATE|MISSENSE|tTc/tCc|F75S|312|OR1F1||CODING|NM_012360.1|1|1);FS=17.047;HaplotypeScore=3.3927;MLEAC=1;MLEAF=0.500;MQ=59.93;MQ0=0;MQRankSum=0.526;QD=14.29;ReadPosRankSum=-0.334	chr16.3254246-3255185 ; 16p13.3 ; gain
OR1L8	olfactory receptor, family 1, subfamily L, member 8	0.0555556	AC=2;AF=1.00;AN=2;BaseQRankSum=1.725;DP=500;Dels=0.00;EFF=NON_SYNONYMOUS_CODING(MODERATE|MISSENSE|Agc/Tgc|S113C|309|OR1L8||CODING|NM_001004454.1|1|1);FS=0.000;HaplotypeScore=6.3613;MLEAC=2;MLEAF=1.00;MQ=60.00;MQ0=0;MQRankSum=-1.296;QD=29.97;ReadPosRankSum=-0.984	chr9.125329826-125330756 ; 9q33.2 ; gain
OR2B2	olfactory receptor, family 2, subfamily B, member 2	0.0833333	AC=1;AF=0.500;AN=2;BaseQRankSum=-0.294;DP=500;Dels=0.00;EFF=NON_SYNONYMOUS_CODING(MODERATE|MISSENSE|cAa/cCa|Q261P|357|OR2B2||CODING|NM_033057.2|1|1);FS=14.243;HaplotypeScore=15.9349;MLEAC=1;MLEAF=0.500;MQ=59.94;MQ0=0;MQRankSum=0.032;QD=11.97;ReadPosRankSum=-0.346	chr6.27878962-27880174 ; 6p22.1 ; gain
OR2M2	olfactory receptor, family 2, subfamily M, member 2	0.611111	AC=2;AF=1.00;AN=2;DB;DP=500;Dels=0.00;EFF=NON_SYNONYMOUS_CODING(MODERATE|MISSENSE|Cga/Gga|R220G|347|OR2M2||CODING|NM_001004688.1|1|1);FS=0.000;HaplotypeScore=0.9159;MLEAC=2;MLEAF=1.00;MQ=33.37;MQ0=25;QD=30.12	chr1.248343287-248344331 ; 1q44 ; loss
OR2M3	olfactory receptor, family 2, subfamily M, member 3	0.0555556	AC=1;AF=0.500;AN=2;BaseQRankSum=-4.955;DP=500;Dels=0.00;EFF=NON_SYNONYMOUS_CODING(MODERATE|MISSENSE|aCc/aAc|T53N|312|OR2M3||CODING|NM_001004689.1|1|1);FS=1.873;HaplotypeScore=6.4908;MLEAC=1;MLEAF=0.500;MQ=42.67;MQ0=4;MQRankSum=12.555;QD=12.33;ReadPosRankSum=0.526	chr1.248366369-248367308 ; 1q44 ; loss
OR3A2	olfactory receptor, family 3, subfamily A, member 2	0.0555556	NA	chr17.3181183-3182268 ; 17p13.3 ; gain
OR4A15	olfactory receptor, family 4, subfamily A, member 15	0.0555556	AC=1;AF=0.500;AN=2;BaseQRankSum=-12.464;DP=500;Dels=0.00;EFF=NON_SYNONYMOUS_CODING(MODERATE|MISSENSE|aaG/aaC|K53N|344|OR4A15||CODING|NM_001005275.1|1|1);FS=5.426;HaplotypeScore=12.3303;MLEAC=1;MLEAF=0.500;MQ=59.87;MQ0=0;MQRankSum=1.084;QD=12.99;ReadPosRankSum=0.259	chr11.55135359-55136394 ; 11q11 ; loss
OR4D1	olfactory receptor, family 4, subfamily D, member 1	0.111111	AC=1;AF=0.500;AN=2;BaseQRankSum=-1.269;DB;DP=500;Dels=0.00;EFF=NON_SYNONYMOUS_CODING(MODERATE|MISSENSE|Cta/Ata|L174I|310|OR4D1||CODING|NM_012374.1|1|1),UPSTREAM(MODIFIER|||||MSX2P1||NON_CODING|NR_002307.1||1);FS=4.943;HaplotypeScore=23.9231;MLEAC=1;MLEAF=0.500;MQ=59.70;MQ0=0;MQRankSum=0.772;QD=14.53;ReadPosRankSum=0.381	chr17.56232514-56233447 ; 17q22 ; loss
OR4F6	olfactory receptor, family 4, subfamily F, member 6	0.0555556	NA	chr15.102345922-102346861 ; 15q26.3 ; gain
OR4K1	olfactory receptor, family 4, subfamily K, member 1	0.611111	AC=1;AF=0.500;AN=2;BaseQRankSum=-2.529;DP=500;Dels=0.00;EFF=NON_SYNONYMOUS_CODING(MODERATE|MISSENSE|atG/atA|M195I|311|OR4K1||CODING|NM_001004063.2|1|1);FS=5.265;HaplotypeScore=1.9459;MLEAC=1;MLEAF=0.500;MQ=60.00;MQ0=0;MQRankSum=-0.978;QD=6.62;ReadPosRankSum=-1.035	chr14.20403766-20404842 ; 14q11.2 ; gain
OR4M2	olfactory receptor, family 4, subfamily M, member 2	0.138889	AC=1;AF=0.500;AN=2;BaseQRankSum=-2.521;DP=500;Dels=0.00;EFF=EXON(MODIFIER|||||LOC727924||NON_CODING|NR_015416.1|10|1),NON_SYNONYMOUS_CODING(MODERATE|MISSENSE|tCt/tGt|S156C|313|OR4M2||CODING|NM_001004719.2|1|1);FS=0.000;HaplotypeScore=5.5608;MLEAC=1;MLEAF=0.500;MQ=46.78;MQ0=0;MQRankSum=2.102;QD=18.26;ReadPosRankSum=-0.701	chr15.22368477-22369561 ; 15q11.2 ; gain
OR4X1	olfactory receptor, family 4, subfamily X, member 1	0.277778	AC=1;AF=0.500;AN=2;BaseQRankSum=13.290;DB;DP=500;Dels=0.00;EFF=NON_SYNONYMOUS_CODING(MODERATE|MISSENSE|cCg/cTg|P165L|305|OR4X1||CODING|NM_001004726.1|1|1);FS=0.000;HaplotypeScore=5.4792;MLEAC=1;MLEAF=0.500;MQ=60.00;MQ0=0;MQRankSum=-0.542;QD=13.84;ReadPosRankSum=-0.945	chr11.48285412-48286330 ; 11p11.2 ; loss
OR51G2	olfactory receptor, family 51, subfamily G, member 2	0.25	AC=1;AF=0.500;AN=2;BaseQRankSum=-9.044;DB;DP=500;Dels=0.00;EFF=NON_SYNONYMOUS_CODING(MODERATE|MISSENSE|gCa/gAa|A94E|314|OR51G2||CODING|NM_001005238.1|1|1);FS=2.348;HaplotypeScore=4.0765;MLEAC=1;MLEAF=0.500;MQ=60.00;MQ0=0;MQRankSum=0.438;QD=13.08;ReadPosRankSum=-0.927	chr11.4935948-4936893 ; 11p15.4 ; gain
OR52A5	olfactory receptor, family 52, subfamily A, member 5	0.0555556	AC=1;AF=0.500;AN=2;BaseQRankSum=0.235;DP=500;Dels=0.00;EFF=NON_SYNONYMOUS_CODING(MODERATE|MISSENSE|atC/atG|I177M|316|OR52A5||CODING|NM_001005160.2|1|1);FS=0.671;HaplotypeScore=6.8074;MLEAC=1;MLEAF=0.500;MQ=60.00;MQ0=0;MQRankSum=-0.032;QD=13.42;ReadPosRankSum=1.383	chr11.5152921-5153872 ; 11p15.4 ; gain
OR52B6	olfactory receptor, family 52, subfamily B, member 6	0.0555556	AC=1;AF=0.500;AN=2;BaseQRankSum=2.912;DP=500;Dels=0.00;EFF=NON_SYNONYMOUS_CODING(MODERATE|MISSENSE|gTg/gAg|V314E|335|OR52B6||CODING|NM_001005162.2|1|1);FS=0.706;HaplotypeScore=4.4894;MLEAC=1;MLEAF=0.500;MQ=60.00;MQ0=0;MQRankSum=0.407;QD=13.85;ReadPosRankSum=0.252	chr11.5602106-5603114 ; 11p15.4 ; gain
OR52L1	olfactory receptor, family 52, subfamily L, member 1	0.0555556	AC=1;AF=0.500;AN=2;BaseQRankSum=-12.098;DP=500;Dels=0.00;EFF=NON_SYNONYMOUS_CODING(MODERATE|MISSENSE|Gtt/Att|V202I|329|OR52L1||CODING|NM_001005173.2|1|1);FS=1.867;HaplotypeScore=6.6055;MLEAC=1;MLEAF=0.500;MQ=56.02;MQ0=3;MQRankSum=-0.030;QD=13.50;ReadPosRankSum=-0.409	chr11.6007121-6008215 ; 11p15.4 ; gain
OR5AS1	olfactory receptor, family 5, subfamily AS, member 1	0.25	AC=1;AF=0.500;AN=2;BaseQRankSum=-1.472;DB;DP=500;Dels=0.00;EFF=NON_SYNONYMOUS_CODING(MODERATE|MISSENSE|cGc/cTc|R122L|324|OR5AS1||CODING|NM_001001921.1|1|1);FS=7.906;HaplotypeScore=1.3670;MLEAC=1;MLEAF=0.500;MQ=60.00;MQ0=0;MQRankSum=0.453;QD=13.01;ReadPosRankSum=-0.226	chr11.55797894-55798869 ; 11q12.1 ; loss
OR5H14	olfactory receptor, family 5, subfamily H, member 14	0.138889	AC=1;AF=0.500;AN=2;BaseQRankSum=10.980;DP=499;Dels=0.00;EFF=NON_SYNONYMOUS_CODING(MODERATE|MISSENSE|gAc/gGc|D180G|310|OR5H14||CODING|NM_001005514.1|1|1);FS=18.580;HaplotypeScore=7.9527;MLEAC=1;MLEAF=0.500;MQ=56.78;MQ0=0;MQRankSum=-8.094;QD=14.82;ReadPosRankSum=0.654	chr3.97868229-97869162 ; 3q11.2 ; gain
OR5H15	olfactory receptor, family 5, subfamily H, member 15	0.138889	NA	chr3.97887543-97888485 ; 3q11.2 ; gain
OR5P3	olfactory receptor, family 5, subfamily P, member 3	0.194444	AC=1;AF=0.500;AN=2;BaseQRankSum=0.285;DP=500;Dels=0.00;EFF=NON_SYNONYMOUS_CODING(MODERATE|MISSENSE|aCc/aTc|T279I|311|OR5P3||CODING|NM_153445.1|1|1);FS=3.114;HaplotypeScore=410.0351;MLEAC=1;MLEAF=0.500;MQ=53.42;MQ0=2;MQRankSum=-12.658;QD=9.69;ReadPosRankSum=10.283	chr11.7846583-7847519 ; 11p15.4 ; gain
OR5T1	olfactory receptor, family 5, subfamily T, member 1	0.0555556	AC=1;AF=0.500;AN=2;BaseQRankSum=-4.684;DP=500;Dels=0.00;EFF=NON_SYNONYMOUS_CODING(MODERATE|MISSENSE|Gtg/Ttg|V154L|326|OR5T1||CODING|NM_001004745.1|1|1);FS=2.367;HaplotypeScore=4.6995;MLEAC=1;MLEAF=0.500;MQ=50.17;MQ0=2;MQRankSum=17.329;QD=12.80;ReadPosRankSum=0.572	chr11.56043114-56044095 ; 11q12.1 ; loss
OR5T2	olfactory receptor, family 5, subfamily T, member 2	0.25	AC=1;AF=0.500;AN=2;BaseQRankSum=-0.803;DB;DP=500;Dels=0.00;EFF=NON_SYNONYMOUS_CODING(MODERATE|MISSENSE|Ctc/Gtc|L238V|359|OR5T2||CODING|NM_001004746.1|1|1);FS=9.790;HaplotypeScore=2.9543;MLEAC=1;MLEAF=0.500;MQ=59.98;MQ0=0;MQRankSum=0.698;QD=13.12;ReadPosRankSum=-0.304	chr11.55999581-56000661 ; 11q12.1 ; loss
OR5T3	olfactory receptor, family 5, subfamily T, member 3	0.0833333	AC=1;AF=0.500;AN=2;BaseQRankSum=-5.993;DP=500;Dels=0.00;EFF=NON_SYNONYMOUS_CODING(MODERATE|MISSENSE|atG/atT|M89I|340|OR5T3||CODING|NM_001004747.1|1|1);FS=3.252;HaplotypeScore=9.5305;MLEAC=1;MLEAF=0.500;MQ=59.79;MQ0=0;MQRankSum=-1.302;QD=15.51;ReadPosRankSum=-1.604	chr11.56019675-56020698 ; 11q12.1 ; loss
OR6B3	olfactory receptor, family 6, subfamily B, member 3	0.25	AC=2;AF=1.00;AN=2;BaseQRankSum=0.920;DB;DP=500;Dels=0.00;EFF=DOWNSTREAM(MODIFIER||||331|OR6B3||CODING|NM_173351.1||1),NON_SYNONYMOUS_CODING(MODERATE|MISSENSE|cGg/cTg|R95L|389|PRR21||CODING|NM_001080835.1|1|1);FS=0.000;HaplotypeScore=16.3176;MLEAC=2;MLEAF=1.00;MQ=54.84;MQ0=22;MQRankSum=4.696;QD=31.07;ReadPosRankSum=2.754	chr2.240984493-240985489 ; 2q37.3 ; gain
OR6K2	olfactory receptor, family 6, subfamily K, member 2	0.111111	AC=1;AF=0.500;AN=2;BaseQRankSum=-3.563;DP=500;Dels=0.00;EFF=NON_SYNONYMOUS_CODING(MODERATE|MISSENSE|Cca/Tca|P317S|324|OR6K2||CODING|NM_001005279.1|1|1);FS=1.949;HaplotypeScore=13.5599;MLEAC=1;MLEAF=0.500;MQ=60.00;MQ0=0;MQRankSum=-0.656;QD=2.41;ReadPosRankSum=0.175	chr1.158669467-158670442 ; 1q23.1 ; gain
OR6N1	olfactory receptor, family 6, subfamily N, member 1	0.111111	AC=1;AF=0.500;AN=2;BaseQRankSum=0.052;DP=500;Dels=0.00;EFF=NON_SYNONYMOUS_CODING(MODERATE|MISSENSE|gGg/gAg|G155E|312|OR6N1||CODING|NM_001005185.1|1|1);FS=1.979;HaplotypeScore=12.6814;MLEAC=1;MLEAF=0.500;MQ=59.90;MQ0=0;MQRankSum=0.519;QD=14.91;ReadPosRankSum=2.282	chr1.158735533-158736472 ; 1q23.1 ; gain
OR6P1	olfactory receptor, family 6, subfamily P, member 1	0.138889	AC=1;AF=0.500;AN=2;BaseQRankSum=-1.006;DP=500;Dels=0.00;EFF=NON_SYNONYMOUS_CODING(MODERATE|MISSENSE|Act/Tct|T110S|317|OR6P1||CODING|NM_001160325.1|1|1);FS=0.000;HaplotypeScore=17.5147;MLEAC=1;MLEAF=0.500;MQ=60.00;MQ0=0;MQRankSum=0.540;QD=24.96;ReadPosRankSum=1.314	chr1.158532440-158533394 ; 1q23.1 ; gain
OR6T1	olfactory receptor, family 6, subfamily T, member 1	0.0555556	AC=1;AF=0.500;AN=2;BaseQRankSum=-10.091;DP=500;Dels=0.00;EFF=DOWNSTREAM(MODIFIER||||323|OR6T1||CODING|NM_001005187.1||1),NON_SYNONYMOUS_CODING(MODERATE|MISSENSE|agC/agA|S227R|318|OR4D5||CODING|NM_001001965.1|1|1);FS=4.718;HaplotypeScore=3.5142;MLEAC=1;MLEAF=0.500;MQ=59.95;MQ0=0;MQRankSum=1.908;QD=12.80;ReadPosRankSum=0.017	chr11.123813573-123814545 ; 11q24.1 ; gain
OR6Y1	olfactory receptor, family 6, subfamily Y, member 1	0.527778	AC=1;AF=0.500;AN=2;BaseQRankSum=11.138;DB;DP=500;Dels=0.00;EFF=NON_SYNONYMOUS_CODING(MODERATE|MISSENSE|Gtc/Atc|V252I|325|OR6Y1||CODING|NM_001005189.1|1|1);FS=2.091;HaplotypeScore=4.6587;MLEAC=1;MLEAF=0.500;MQ=60.00;MQ0=0;MQRankSum=0.441;QD=13.77;ReadPosRankSum=0.507	chr1.158516917-158517895 ; 1q23.1 ; gain
OR8A1	olfactory receptor, family 8, subfamily A, member 1	0.0833333	AC=1;AF=0.500;AN=2;BaseQRankSum=11.187;DP=500;Dels=0.00;EFF=NON_SYNONYMOUS_CODING(MODERATE|MISSENSE|Tac/Cac|Y77H|326|OR8A1||CODING|NM_001005194.1|1|1);FS=1.749;HaplotypeScore=20.7895;MLEAC=1;MLEAF=0.500;MQ=59.65;MQ0=0;MQRankSum=0.881;QD=23.81;ReadPosRankSum=-0.707	chr11.124439964-124440945 ; 11q24.2 ; gain
OR8B4	olfactory receptor, family 8, subfamily B, member 4	0.416667	AC=1;AF=0.500;AN=2;BaseQRankSum=-9.549;DB;DP=500;Dels=0.00;EFF=NON_SYNONYMOUS_CODING(MODERATE|MISSENSE|tGc/tTc|C140F|309|OR8B4||CODING|NM_001005196.1|1|1);FS=5.105;HaplotypeScore=0.9973;MLEAC=1;MLEAF=0.500;MQ=60.00;MQ0=0;MQRankSum=-2.378;QD=13.95;ReadPosRankSum=-0.093 , AC=1;AF=0.500;AN=2;BaseQRankSum=3.366;DB;DP=500;Dels=0.00;EFF=NON_SYNONYMOUS_CODING(MODERATE|MISSENSE|Tac/Cac|Y131H|309|OR8B4||C…	chr11.124293837-124294767 ; 11q24.2 ; gain
OR8D4	olfactory receptor, family 8, subfamily D, member 4	0.277778	AC=2;AF=1.00;AN=2;BaseQRankSum=-0.539;DB;DP=500;Dels=0.00;EFF=NON_SYNONYMOUS_CODING(MODERATE|MISSENSE|cTt/cGt|L55R|314|OR8D4||CODING|NM_001005197.1|1|1);FS=2.048;HaplotypeScore=5.9075;MLEAC=2;MLEAF=1.00;MQ=59.95;MQ0=0;MQRankSum=-1.827;QD=33.36;ReadPosRankSum=0.490	chr11.123777138-123778083 ; 11q24.1 ; gain
OR8H3	olfactory receptor, family 8, subfamily H, member 3	0.277778	AC=1;AF=0.500;AN=2;BaseQRankSum=13.284;DB;DP=500;Dels=0.00;EFF=NON_SYNONYMOUS_CODING(MODERATE|MISSENSE|aCg/aTg|T16M|312|OR8H3||CODING|NM_001005201.1|1|1);FS=5.403;HaplotypeScore=2.8815;MLEAC=1;MLEAF=0.500;MQ=59.22;MQ0=0;MQRankSum=1.826;QD=13.86;ReadPosRankSum=0.331	chr11.55889848-55890787 ; 11q12.1 ; loss
OR8J3	olfactory receptor, family 8, subfamily J, member 3	0.25	AC=1;AF=0.500;AN=2;BaseQRankSum=9.952;DB;DP=500;Dels=0.00;EFF=NON_SYNONYMOUS_CODING(MODERATE|MISSENSE|gaT/gaG|D271E|315|OR8J3||CODING|NM_001004064.1|1|1);FS=5.582;HaplotypeScore=10.4134;MLEAC=1;MLEAF=0.500;MQ=59.91;MQ0=0;MQRankSum=1.376;QD=13.96;ReadPosRankSum=-0.783 , AC=1;AF=0.500;AN=2;BaseQRankSum=4.647;DB;DP=500;Dels=0.00;EFF=NON_SYNONYMOUS_CODING(MODERATE|MISSENSE|Tat/Cat|Y123H|315|OR8J3||CO…	chr11.55904246-55905194 ; 11q12.1 ; loss
OR9G1	olfactory receptor, family 9, subfamily G, member 9; olfactory receptor, family 9, subfamily G, member 1	0.111111	NA	chr11.56467863-56468781 ; 11q12.1 ; loss
OSBPL5	oxysterol binding protein-like 5	0.0555556	AC=1;AF=0.500;AN=2;BaseQRankSum=9.929;DP=470;Dels=0.00;EFF=NON_SYNONYMOUS_CODING(MODERATE|MISSENSE|cGg/cTg|R692L|811|OSBPL5||CODING|NM_001144063.1|19|1),NON_SYNONYMOUS_CODING(MODERATE|MISSENSE|cGg/cTg|R692L|811|OSBPL5||CODING|NM_145638.2|19|1),NON_SYNONYMOUS_CODING(MODERATE|MISSENSE|cGg/cTg|R760L|879|OSBPL5||CODING|NM_020896.3|20|1);FS=5.661;HaplotypeScore=3.9466;MLEAC=1;MLEAF=0.500;MQ=60.00;MQ0=…	chr11.3108345-3186582 ; 11p15.4 ; gain
OSGIN2	oxidative stress induced growth inhibitor family member 2	0.111111	AC=1;AF=0.500;AN=2;BaseQRankSum=-12.120;DP=500;Dels=0.00;EFF=NON_SYNONYMOUS_CODING(MODERATE|MISSENSE|tCa/tTa|S27L|505|OSGIN2||CODING|NM_004337.2|3|1),NON_SYNONYMOUS_CODING(MODERATE|MISSENSE|tCa/tTa|S71L|549|OSGIN2||CODING|NM_001126111.1|3|1);FS=2.658;HaplotypeScore=1.8934;MLEAC=1;MLEAF=0.500;MQ=60.00;MQ0=0;MQRankSum=1.647;QD=5.74;ReadPosRankSum=-0.511	chr8.90914095-90940095 ; 8q21.3 ; gain
OTUD7B	OTU domain containing 7B	0.138889	AC=1;AF=0.500;AN=2;BaseQRankSum=-6.727;DP=376;Dels=0.00;EFF=NON_SYNONYMOUS_CODING(MODERATE|MISSENSE|Ggc/Cgc|G704R|843|OTUD7B||CODING|NM_020205.2|12|1);FS=2.972;HaplotypeScore=14.2310;MLEAC=1;MLEAF=0.500;MQ=59.94;MQ0=0;MQRankSum=-0.368;QD=8.52;ReadPosRankSum=-1.524	chr1.149912231-149982686 ; 1q21.2 ; gain
OXSM	3-oxoacyl-ACP synthase, mitochondrial	0.0555556	AC=1;AF=0.500;AN=2;BaseQRankSum=2.385;DP=500;Dels=0.00;EFF=INTRON(MODIFIER|||||OXSM||CODING|NR_026937.1|2|1),NON_SYNONYMOUS_CODING(MODERATE|MISSENSE|gGg/gTg|G124V|376|OXSM||CODING|NM_001145391.1|2|1),NON_SYNONYMOUS_CODING(MODERATE|MISSENSE|gGg/gTg|G124V|459|OXSM||CODING|NM_017897.2|2|1),UPSTREAM(MODIFIER||||612|NGLY1||CODING|NM_001145294.1||1);FS=4.525;HaplotypeScore=4.5182;MLEAC=1;MLEAF=0.500;MQ…	chr3.25831562-25836025 ; 3p24.2 ; gain
P2RY2	purinergic receptor P2Y, G-protein coupled, 2	0.0555556	AC=1;AF=0.500;AN=2;BaseQRankSum=3.712;DB;DP=500;Dels=0.00;EFF=NON_SYNONYMOUS_CODING(MODERATE|MISSENSE|gaT/gaG|D17E|377|P2RY2||CODING|NM_002564.2|3|1),NON_SYNONYMOUS_CODING(MODERATE|MISSENSE|gaT/gaG|D17E|377|P2RY2||CODING|NM_176071.1|3|1),NON_SYNONYMOUS_CODING(MODERATE|MISSENSE|gaT/gaG|D17E|377|P2RY2||CODING|NM_176072.1|3|1);FS=10.183;HaplotypeScore=318.0518;MLEAC=1;MLEAF=0.500;MQ=59.65;MQ0=0;MQRa…	chr11.72929342-72953472 ; 11q13.4 ; gain
P4HTM	prolyl 4-hydroxylase, transmembrane (endoplasmic reticulum)	0.111111	AC=1;AF=0.500;AN=2;BaseQRankSum=-12.422;DP=500;Dels=0.00;EFF=NON_SYNONYMOUS_CODING(MODERATE|MISSENSE|Gag/Aag|E225K|502|P4HTM||CODING|NM_177939.2|4|1),NON_SYNONYMOUS_CODING(MODERATE|MISSENSE|Gag/Aag|E225K|563|P4HTM||CODING|NM_177938.2|4|1),UPSTREAM(MODIFIER||||1151|WDR6||CODING|NM_018031.3||1);FS=2.300;HaplotypeScore=8.4103;MLEAC=1;MLEAF=0.500;MQ=59.94;MQ0=0;MQRankSum=0.498;QD=13.83;ReadPosRankSum…	chr3.49027340-49044581 ; 3p21.31 ; gain
PACSIN1	protein kinase C and casein kinase substrate in neurons 1	0.0555556	AC=1;AF=0.500;AN=2;BaseQRankSum=5.504;DP=500;Dels=0.00;EFF=NON_SYNONYMOUS_CODING(MODERATE|MISSENSE|gTg/gAg|V267E|444|PACSIN1||CODING|NM_001199583.2|7|1),NON_SYNONYMOUS_CODING(MODERATE|MISSENSE|gTg/gAg|V267E|444|PACSIN1||CODING|NM_020804.4|7|1);FS=4.662;HaplotypeScore=6.0511;MLEAC=1;MLEAF=0.500;MQ=60.00;MQ0=0;MQRankSum=-2.159;QD=18.42;ReadPosRankSum=-0.266	chr6.34433837-34503000 ; 6p21.31 ; gain
PAK7	p21 protein (Cdc42/Rac)-activated kinase 7	0.111111	AC=1;AF=0.500;AN=2;BaseQRankSum=13.333;DP=500;Dels=0.00;EFF=NON_SYNONYMOUS_CODING(MODERATE|MISSENSE|Acg/Gcg|T46A|719|PAK7||CODING|NM_020341.3|4|1),NON_SYNONYMOUS_CODING(MODERATE|MISSENSE|Acg/Gcg|T46A|719|PAK7||CODING|NM_177990.2|3|1);FS=8.781;HaplotypeScore=14.8079;MLEAC=1;MLEAF=0.500;MQ=60.00;MQ0=0;MQRankSum=0.615;QD=9.01;ReadPosRankSum=0.466	chr20.9518036-9819687 ; 20p12.2 ; gain
PANX3	pannexin 3	0.0833333	AC=2;AF=1.00;AN=2;BaseQRankSum=0.005;DP=255;Dels=0.00;EFF=NON_SYNONYMOUS_CODING(MODERATE|MISSENSE|Gtg/Atg|V125M|392|PANX3||CODING|NM_052959.2|3|1);FS=2.691;HaplotypeScore=8.5452;MLEAC=2;MLEAF=1.00;MQ=59.97;MQ0=0;MQRankSum=0.112;QD=30.74;ReadPosRankSum=-1.423	chr11.124481452-124490251 ; 11q24.2 ; gain
PAPSS1	3-phosphoadenosine 5-phosphosulfate synthase 1	0.0555556	NA	chr4.108534821-108641419 ; 4q25 ; loss
PATE1	prostate and testis expressed 1	0.0555556	AC=1;AF=0.500;AN=2;BaseQRankSum=-11.304;DP=500;Dels=0.00;EFF=NON_SYNONYMOUS_CODING(MODERATE|MISSENSE|Gat/Aat|D28N|126|PATE1||CODING|NM_138294.2|2|1);FS=1.966;HaplotypeScore=11.6371;MLEAC=1;MLEAF=0.500;MQ=60.00;MQ0=0;MQRankSum=0.097;QD=12.33;ReadPosRankSum=-0.635	chr11.125616187-125619743 ; 11q24.2 ; gain
PAWR	PRKC, apoptosis, WT1, regulator	0.111111	AC=1;AF=0.500;AN=2;BaseQRankSum=1.588;DP=500;Dels=0.00;EFF=NON_SYNONYMOUS_CODING(MODERATE|MISSENSE|Gaa/Aaa|E318K|340|PAWR||CODING|NM_002583.2|7|1);FS=14.587;HaplotypeScore=8.0386;MLEAC=1;MLEAF=0.500;MQ=60.00;MQ0=0;MQRankSum=0.675;QD=15.98;ReadPosRankSum=0.919	chr12.79985744-80084790 ; 12q21.2 ; gain
PAX1	paired box 1	0.0555556	AC=1;AF=0.500;AN=2;BaseQRankSum=11.939;DP=500;Dels=0.00;EFF=NON_SYNONYMOUS_CODING(MODERATE|MISSENSE|Cgc/Agc|R197S|457|PAX1||CODING|NM_001257096.1|2|1),NON_SYNONYMOUS_CODING(MODERATE|MISSENSE|Cgc/Agc|R197S|534|PAX1||CODING|NM_006192.4|2|1);FS=0.397;HaplotypeScore=10.0368;MLEAC=1;MLEAF=0.500;MQ=60.00;MQ0=0;MQRankSum=0.724;QD=17.15;ReadPosRankSum=0.396	chr20.21686296-21699124 ; 20p11.22 ; gain
PAX8	paired box 8	0.0833333	AC=1;AF=0.500;AN=2;BaseQRankSum=2.224;DB;DP=500;Dels=0.00;EFF=INTRON(MODIFIER||||287|PAX8||CODING|NM_013992.3|7|1),INTRON(MODIFIER||||321|PAX8||CODING|NM_013953.3|7|1),NON_SYNONYMOUS_CODING(MODERATE|MISSENSE|Ttt/Ctt|F329L|450|PAX8||CODING|NM_003466.3|9|1),SYNONYMOUS_CODING(LOW|SILENT|ccT/ccC|P302|398|PAX8||CODING|NM_013952.3|9|1),UPSTREAM(MODIFIER|||||LOC654433||NON_CODING|NR_015377.2||1),UPSTREA…	chr2.113973573-114036498 ; 2q13 ; gain
PBRM1	polybromo 1	0.222222	AC=1;AF=0.500;AN=2;BaseQRankSum=-11.978;DP=500;Dels=0.00;EFF=NON_SYNONYMOUS_CODING(MODERATE|MISSENSE|Cca/Aca|P199T|1582|PBRM1||CODING|NM_018313.4|6|1);FS=8.624;HaplotypeScore=10.9446;MLEAC=1;MLEAF=0.500;MQ=60.00;MQ0=0;MQRankSum=-1.247;QD=3.94;ReadPosRankSum=0.067	chr3.52579367-52719866 ; 3p21.1 ; gain
PC	pyruvate carboxylase	0.0833333	AC=1;AF=0.500;AN=2;BaseQRankSum=-1.624;DP=500;Dels=0.00;EFF=NON_SYNONYMOUS_CODING(MODERATE|MISSENSE|gGg/gAg|G645E|1178|PC||CODING|NM_000920.3|15|1),NON_SYNONYMOUS_CODING(MODERATE|MISSENSE|gGg/gAg|G645E|1178|PC||CODING|NM_001040716.1|16|1),NON_SYNONYMOUS_CODING(MODERATE|MISSENSE|gGg/gAg|G645E|1178|PC||CODING|NM_022172.2|14|1);FS=0.000;HaplotypeScore=12.4900;MLEAC=1;MLEAF=0.500;MQ=60.00;MQ0=0;MQRan…	chr11.66615996-66725847 ; 11q13.2 ; gain
PCDH7	protocadherin 7	0.0555556	AC=1;AF=0.500;AN=2;BaseQRankSum=-5.745;DP=500;Dels=0.00;EFF=NON_SYNONYMOUS_CODING(MODERATE|MISSENSE|Gtg/Atg|V884M|1069|PCDH7||CODING|NM_002589.2|1|1),NON_SYNONYMOUS_CODING(MODERATE|MISSENSE|Gtg/Atg|V884M|1072|PCDH7||CODING|NM_032456.2|1|1),NON_SYNONYMOUS_CODING(MODERATE|MISSENSE|Gtg/Atg|V884M|1247|PCDH7||CODING|NM_032457.3|1|1),NON_SYNONYMOUS_CODING(MODERATE|MISSENSE|Gtg/Atg|V884M|1255|PCDH7||COD…	chr4.30722029-31148423 ; 4p15.1 ; loss
PCF11	PCF11, cleavage and polyadenylation factor subunit, homolog (S. cerevisiae)	0.0833333	AC=1;AF=0.500;AN=2;BaseQRankSum=-7.781;DP=500;Dels=0.00;EFF=NON_SYNONYMOUS_CODING(MODERATE|MISSENSE|tCt/tTt|S599F|1555|PCF11||CODING|NM_015885.3|5|1);FS=3.899;HaplotypeScore=4.4712;MLEAC=1;MLEAF=0.500;MQ=59.89;MQ0=1;MQRankSum=-1.145;QD=14.43;ReadPosRankSum=-1.197	chr11.82868136-82896835 ; 11q14.1 ; gain
PCOLCE2	procollagen C-endopeptidase enhancer 2	0.0555556	AC=1;AF=0.500;AN=2;BaseQRankSum=-7.841;DP=500;Dels=0.00;EFF=NON_SYNONYMOUS_CODING(MODERATE|MISSENSE|Ggc/Tgc|G353C|415|PCOLCE2||CODING|NM_013363.3|8|1);FS=12.317;HaplotypeScore=8.4272;MLEAC=1;MLEAF=0.500;MQ=60.00;MQ0=0;MQRankSum=-0.655;QD=11.15;ReadPosRankSum=0.562	chr3.142536701-142608045 ; 3q23 ; gain
PCSK1	proprotein convertase subtilisin/kexin type 1	0.0555556	AC=2;AF=1.00;AN=2;BaseQRankSum=-0.446;DP=500;Dels=0.00;EFF=NON_SYNONYMOUS_CODING(MODERATE|MISSENSE|aGt/aAt|S127N|443|PCSK1||CODING|NM_001177876.1|4|1),NON_SYNONYMOUS_CODING(MODERATE|MISSENSE|aGt/aAt|S390N|706|PCSK1||CODING|NM_001177875.1|10|1),NON_SYNONYMOUS_CODING(MODERATE|MISSENSE|aGt/aAt|S437N|753|PCSK1||CODING|NM_000439.4|10|1);FS=0.000;HaplotypeScore=7.4387;MLEAC=2;MLEAF=1.00;MQ=60.00;MQ0=0;…	chr5.95726039-95768985 ; 5q15 ; gain
PCSK5	proprotein convertase subtilisin/kexin type 5	0.305556	AC=1;AF=0.500;AN=2;BaseQRankSum=-6.324;DB;DP=500;Dels=0.00;EFF=NON_SYNONYMOUS_CODING(MODERATE|MISSENSE|gaC/gaA|D1699E|1860|PCSK5||CODING|NM_001190482.1|36|1);FS=4.445;HaplotypeScore=10.0027;MLEAC=1;MLEAF=0.500;MQ=60.00;MQ0=0;MQRankSum=0.929;QD=14.57;ReadPosRankSum=0.491	chr9.78505559-78977255 ; 9q21.13 ; gain
PDCD6IP	programmed cell death 6 interacting protein	0.333333	AC=2;AF=1.00;AN=2;BaseQRankSum=-0.059;DB;DP=500;Dels=0.00;EFF=NON_SYNONYMOUS_CODING(MODERATE|MISSENSE|Gtt/Att|V378I|868|PDCD6IP||CODING|NM_013374.5|9|1),NON_SYNONYMOUS_CODING(MODERATE|MISSENSE|Gtt/Att|V383I|873|PDCD6IP||CODING|NM_001162429.2|9|1);FS=0.000;HaplotypeScore=19.0414;MLEAC=2;MLEAF=1.00;MQ=48.30;MQ0=5;MQRankSum=2.625;QD=31.35;ReadPosRankSum=0.071	chr3.33840062-33911199 ; 3p22.3 ; gain
PDE12	phosphodiesterase 12	0.138889	AC=1;AF=0.500;AN=2;BaseQRankSum=-6.057;DP=500;Dels=0.00;EFF=NON_SYNONYMOUS_CODING(MODERATE|MISSENSE|Tgt/Cgt|C483R|609|PDE12||CODING|NM_177966.5|3|1);FS=1.645;HaplotypeScore=5.6096;MLEAC=1;MLEAF=0.500;MQ=59.82;MQ0=0;MQRankSum=0.000;QD=10.26;ReadPosRankSum=4.838	chr3.57541980-57547768 ; 3p14.3 ; gain
PDGFRA	platelet-derived growth factor receptor, alpha polypeptide	0.166667	AC=1;AF=0.500;AN=2;BaseQRankSum=-2.985;DP=500;Dels=0.00;EFF=NON_SYNONYMOUS_CODING(MODERATE|MISSENSE|Caa/Gaa|Q412E|1089|PDGFRA||CODING|NM_006206.4|8|1);FS=0.694;HaplotypeScore=4.7081;MLEAC=1;MLEAF=0.500;MQ=60.00;MQ0=0;MQRankSum=-0.478;QD=12.85;ReadPosRankSum=3.001	chr4.55095263-55164412 ; 4q12 ; gain
PDPR	pyruvate dehydrogenase phosphatase regulatory subunit	0.638889	AC=1;AF=0.500;AN=2;BaseQRankSum=5.144;DB;DP=500;Dels=0.00;EFF=NON_SYNONYMOUS_CODING(MODERATE|MISSENSE|Atc/Gtc|I206V|879|PDPR||CODING|NM_017990.3|7|1);FS=0.432;HaplotypeScore=1.9880;MLEAC=1;MLEAF=0.500;MQ=54.40;MQ0=0;MQRankSum=3.326;QD=3.38;ReadPosRankSum=-1.050	chr16.70147528-70195184 ; 16q22.1 ; gain
PDZD3	PDZ domain containing 3	0.444444	AC=1;AF=0.500;AN=2;BaseQRankSum=7.969;DB;DP=500;Dels=0.00;EFF=DOWNSTREAM(MODIFIER||||491|PDZD3||CODING|NM_024791.3||1),DOWNSTREAM(MODIFIER||||505|PDZD3||CODING|NM_001168468.1||1),DOWNSTREAM(MODIFIER|||||PDZD3||CODING|NR_033122.1||1),NON_SYNONYMOUS_CODING(MODERATE|MISSENSE|cGc/cAc|R101H|210|CCDC153||CODING|NM_001145018.1|5|1);FS=4.902;HaplotypeScore=10.0687;MLEAC=1;MLEAF=0.500;MQ=60.00;MQ0=0;MQRan…	chr11.119056165-119060932 ; 11q23.3 ; gain
PDZD8	PDZ domain containing 8	0.0833333	AC=1;AF=0.500;AN=2;BaseQRankSum=-11.882;DP=500;Dels=0.00;EFF=NON_SYNONYMOUS_CODING(MODERATE|MISSENSE|Gac/Tac|D574Y|1154|PDZD8||CODING|NM_173791.3|5|1);FS=24.434;HaplotypeScore=5.7053;MLEAC=1;MLEAF=0.500;MQ=60.00;MQ0=0;MQRankSum=1.052;QD=13.53;ReadPosRankSum=-1.127	chr10.119042605-119134937 ; 10q25.3 ; gain
PDZRN3	PDZ domain containing ring finger 3	0.138889	AC=2;AF=1.00;AN=2;BaseQRankSum=-4.372;DP=500;Dels=0.00;EFF=NON_SYNONYMOUS_CODING(MODERATE|MISSENSE|atG/atT|M900I|1066|PDZRN3||CODING|NM_015009.1|10|1);FS=1.266;HaplotypeScore=9.5228;MLEAC=2;MLEAF=1.00;MQ=59.98;MQ0=0;MQRankSum=0.905;QD=32.92;ReadPosRankSum=0.368	chr3.73431651-73674072 ; 3p13 ; gain
PEX11B	peroxisomal biogenesis factor 11 beta	0.138889	NA	chr1.145516164-145523732 ; 1q21.1 ; gain
PFKP	phosphofructokinase, platelet	0.0555556	AC=1;AF=0.500;AN=2;BaseQRankSum=14.857;DP=500;Dels=0.00;EFF=NON_SYNONYMOUS_CODING(MODERATE|MISSENSE|cCg/cTg|P476L|776|PFKP||CODING|NM_001242339.1|17|1),NON_SYNONYMOUS_CODING(MODERATE|MISSENSE|cCg/cTg|P484L|784|PFKP||CODING|NM_002627.4|15|1);FS=5.118;HaplotypeScore=5.2581;MLEAC=1;MLEAF=0.500;MQ=60.00;MQ0=0;MQRankSum=1.256;QD=11.07;ReadPosRankSum=0.510	chr10.3109711-3178997 ; 10p15.2 ; gain
PGC	progastricsin (pepsinogen C)	0.0555556	AC=1;AF=0.500;AN=2;BaseQRankSum=-8.966;DP=500;Dels=0.00;EFF=NON_SYNONYMOUS_CODING(MODERATE|MISSENSE|Gag/Aag|E159K|315|PGC||CODING|NM_001166424.1|5|1),NON_SYNONYMOUS_CODING(MODERATE|MISSENSE|Gag/Aag|E159K|388|PGC||CODING|NM_002630.3|5|1);FS=0.370;HaplotypeScore=6.6327;MLEAC=1;MLEAF=0.500;MQ=59.99;MQ0=0;MQRankSum=1.164;QD=12.86;ReadPosRankSum=-0.744	chr6.41704448-41715139 ; 6p21.1 ; gain
PGR	progesterone receptor	0.0555556	NA	chr11.100900354-101000544 ; 11q22.1 ; gain
PHF14	PHD finger protein 14	0.0555556	AC=1;AF=0.500;AN=2;BaseQRankSum=-6.265;DP=500;Dels=0.00;EFF=EXON(MODIFIER|||||PHF14||CODING|NR_033435.1|8|1),EXON(MODIFIER|||||PHF14||CODING|NR_033436.1|8|1),NON_SYNONYMOUS_CODING(MODERATE|MISSENSE|Gtt/Ttt|V560F|888|PHF14||CODING|NM_014660.3|9|1);FS=0.706;HaplotypeScore=5.8550;MLEAC=1;MLEAF=0.500;MQ=60.00;MQ0=0;MQRankSum=0.414;QD=15.06;ReadPosRankSum=-0.860	chr7.11013498-11209250 ; 7p21.3 ; gain
PHF19	PHD finger protein 19	0.0555556	AC=1;AF=0.500;AN=2;BaseQRankSum=-5.109;DP=500;Dels=0.00;EFF=NON_SYNONYMOUS_CODING(MODERATE|MISSENSE|aGa/aCa|R393T|580|PHF19||CODING|NM_015651.1|12|1);FS=10.839;HaplotypeScore=4.8593;MLEAC=1;MLEAF=0.500;MQ=59.98;MQ0=0;MQRankSum=-1.829;QD=6.04;ReadPosRankSum=-3.048	chr9.123617930-123639606 ; 9q33.2 ; gain
PHF3	PHD finger protein 3	0.0833333	AC=1;AF=0.500;AN=2;BaseQRankSum=-5.482;DP=500;Dels=0.00;EFF=NON_SYNONYMOUS_CODING(MODERATE|MISSENSE|Gca/Aca|A36T|2039|PHF3||CODING|NM_015153.2|1|1);FS=295.570;HaplotypeScore=10.6021;MLEAC=1;MLEAF=0.500;MQ=59.93;MQ0=0;MQRankSum=-0.227;QD=2.69;ReadPosRankSum=-1.254	chr6.64356430-64424405 ; 6q12 ; gain
PHLDB2	pleckstrin homology-like domain, family B, member 2; phosphatidylinositol-specific phospholipase C, X domain containing 2	0.111111	NA	chr3.111451326-111695364 ; 3q13.2 ; gain
PHLPP2	PH domain and leucine rich repeat protein phosphatase 2	0.111111	AC=1;AF=0.500;AN=2;BaseQRankSum=-7.697;DP=500;Dels=0.00;EFF=NON_SYNONYMOUS_CODING(MODERATE|MISSENSE|aGc/aAc|S260N|1323|PHLPP2||CODING|NM_015020.2|5|1);FS=1.452;HaplotypeScore=7.2253;MLEAC=1;MLEAF=0.500;MQ=60.00;MQ0=0;MQRankSum=-0.730;QD=13.99;ReadPosRankSum=0.074	chr16.71678851-71748704 ; 16q22.2 ; gain
PHOX2A	paired-like homeobox 2a	0.0555556	AC=1;AF=0.500;AN=2;BaseQRankSum=-3.133;DP=264;Dels=0.00;EFF=DOWNSTREAM(MODIFIER||||284|PHOX2A||CODING|NM_005169.3||1),NON_SYNONYMOUS_CODING(MODERATE|MISSENSE|cCc/cTc|P1100L|1258|INPPL1||CODING|NM_001567.3|26|1);FS=14.611;HaplotypeScore=5.9498;MLEAC=1;MLEAF=0.500;MQ=60.00;MQ0=0;MQRankSum=-1.134;QD=12.01;ReadPosRankSum=1.967	chr11.71950120-71955220 ; 11q13.4 ; gain
PI4KB	phosphatidylinositol 4-kinase, catalytic, beta	0.111111	NA	chr1.151264272-151300191 ; 1q21.3 ; gain
PIGN	phosphatidylinositol glycan anchor biosynthesis, class N	0.222222	AC=1;AF=0.500;AN=2;BaseQRankSum=-13.613;DP=500;Dels=0.00;EFF=NON_SYNONYMOUS_CODING(MODERATE|MISSENSE|tgG/tgT|W585C|931|PIGN||CODING|NM_012327.5|18|1),NON_SYNONYMOUS_CODING(MODERATE|MISSENSE|tgG/tgT|W585C|931|PIGN||CODING|NM_176787.4|19|1);FS=0.325;HaplotypeScore=4.2846;MLEAC=1;MLEAF=0.500;MQ=60.00;MQ0=0;MQRankSum=-0.876;QD=13.52;ReadPosRankSum=0.162	chr18.59711457-59854289 ; 18q21.33 ; gain
PITRM1	pitrilysin metallopeptidase 1	0.138889	AC=2;AF=1.00;AN=2;BaseQRankSum=-1.881;DB;DP=500;Dels=0.00;EFF=NON_SYNONYMOUS_CODING(MODERATE|MISSENSE|caG/caC|Q484H|939|PITRM1||CODING|NM_001242309.1|13|1),NON_SYNONYMOUS_CODING(MODERATE|MISSENSE|caG/caC|Q516H|1037|PITRM1||CODING|NM_014889.3|14|1),NON_SYNONYMOUS_CODING(MODERATE|MISSENSE|caG/caC|Q516H|1038|PITRM1||CODING|NM_001242307.1|14|1);FS=5.804;HaplotypeScore=13.0831;MLEAC=2;MLEAF=1.00;MQ=60…	chr10.3179918-3215033 ; 10p15.2 ; gain
PIWIL1	piwi-like 1 (Drosophila)	0.111111	NA	chr12.130822432-130856877 ; 12q24.33 ; gain
PIWIL4	piwi-like 4 (Drosophila)	0.0555556	AC=1;AF=0.500;AN=2;BaseQRankSum=5.160;DP=500;Dels=0.00;EFF=NON_SYNONYMOUS_CODING(MODERATE|MISSENSE|gTg/gAg|V94E|852|PIWIL4||CODING|NM_152431.2|3|1);FS=0.000;HaplotypeScore=3.7443;MLEAC=1;MLEAF=0.500;MQ=60.30;MQ0=0;MQRankSum=0.464;QD=15.51;ReadPosRankSum=-0.725	chr11.94300473-94354587 ; 11q21 ; gain
PKD1	polycystic kidney disease 1 (autosomal dominant)	0.0833333	AC=1;AF=0.500;AN=2;BaseQRankSum=5.638;DB;DP=500;Dels=0.00;EFF=NON_SYNONYMOUS_CODING(MODERATE|MISSENSE|aCg/aTg|T938M|4302|PKD1||CODING|NM_000296.3|11|1),NON_SYNONYMOUS_CODING(MODERATE|MISSENSE|aCg/aTg|T938M|4303|PKD1||CODING|NM_001009944.2|11|1);FS=88.309;HaplotypeScore=3.5276;MLEAC=1;MLEAF=0.500;MQ=32.27;MQ0=63;MQRankSum=-7.956;QD=1.44;ReadPosRankSum=-0.941	chr16.2138710-2185899 ; 16p13.3 ; gain
PLA2G4C	phospholipase A2, group IVC (cytosolic, calcium-independent)	0.0555556	AC=1;AF=0.500;AN=2;BaseQRankSum=-5.947;DP=500;Dels=0.00;EFF=NON_SYNONYMOUS_CODING(MODERATE|MISSENSE|Gct/Tct|A273S|527|PLA2G4C||CODING|NM_001159323.1|10|1),NON_SYNONYMOUS_CODING(MODERATE|MISSENSE|Gct/Tct|A273S|541|PLA2G4C||CODING|NM_003706.2|10|1),NON_SYNONYMOUS_CODING(MODERATE|MISSENSE|Gct/Tct|A283S|551|PLA2G4C||CODING|NM_001159322.1|10|1);FS=9.237;HaplotypeScore=5.4124;MLEAC=1;MLEAF=0.500;MQ=60.…	chr19.48551099-48614109 ; 19q13.33 ; gain
PLAGL2	pleiomorphic adenoma gene-like 2; similar to pleiomorphic adenoma gene-like 2	0.111111	AC=1;AF=0.500;AN=2;BaseQRankSum=-1.618;DP=500;Dels=0.00;EFF=NON_SYNONYMOUS_CODING(MODERATE|MISSENSE|aAg/aGg|K239R|496|PLAGL2||CODING|NM_002657.3|3|1);FS=0.000;HaplotypeScore=9.0923;MLEAC=1;MLEAF=0.500;MQ=59.99;MQ0=0;MQRankSum=0.973;QD=19.78;ReadPosRankSum=-1.527	chr20.30780306-30795546 ; 20q11.21 ; gain
PLCG1	phospholipase C, gamma 1	0.0555556	AC=2;AF=1.00;AN=2;BaseQRankSum=-0.286;DP=500;Dels=0.00;EFF=NON_SYNONYMOUS_CODING(MODERATE|MISSENSE|aaG/aaT|K431N|1290|PLCG1||CODING|NM_182811.1|13|1),NON_SYNONYMOUS_CODING(MODERATE|MISSENSE|aaG/aaT|K431N|1291|PLCG1||CODING|NM_002660.2|13|1);FS=0.000;HaplotypeScore=9.4506;MLEAC=2;MLEAF=1.00;MQ=59.84;MQ0=0;MQRankSum=2.120;QD=32.68;ReadPosRankSum=-0.508	chr20.39766160-39804357 ; 20q12 ; gain
PLEC	similar to Plectin 1 (PLTN) (PCN) (Hemidesmosomal protein 1) (HD1); plectin 1, intermediate filament binding protein 500kDa	0.0833333	AC=1;AF=0.500;AN=2;BaseQRankSum=-3.800;DP=285;Dels=0.00;EFF=NON_SYNONYMOUS_CODING(MODERATE|MISSENSE|cGg/cCg|R1213P|4515|PLEC||CODING|NM_201381.1|27|1),NON_SYNONYMOUS_CODING(MODERATE|MISSENSE|cGg/cCg|R1223P|4525|PLEC||CODING|NM_201379.1|27|1),NON_SYNONYMOUS_CODING(MODERATE|MISSENSE|cGg/cCg|R1231P|4533|PLEC||CODING|NM_201378.2|27|1),NON_SYNONYMOUS_CODING(MODERATE|MISSENSE|cGg/cCg|R1245P|4547|PLEC||…	chr8.144989320-145050913 ; 8q24.3 ; gain
PLEKHA5	pleckstrin homology domain containing, family A member 5	0.138889	AC=1;AF=0.500;AN=2;BaseQRankSum=0.228;DP=500;Dels=0.00;EFF=NON_SYNONYMOUS_CODING(MODERATE|MISSENSE|atG/atC|M1002I|1098|PLEKHA5||CODING|NM_001256787.1|23|1),NON_SYNONYMOUS_CODING(MODERATE|MISSENSE|atG/atC|M1020I|1116|PLEKHA5||CODING|NM_019012.5|23|1),NON_SYNONYMOUS_CODING(MODERATE|MISSENSE|atG/atC|M1078I|1174|PLEKHA5||CODING|NM_001143821.2|25|1),NON_SYNONYMOUS_CODING(MODERATE|MISSENSE|atG/atC|M118…	chr12.19282625-19529333 ; 12p12.3 ; gain
PLXNA2	plexin A2	0.0555556	AC=1;AF=0.500;AN=2;BaseQRankSum=2.769;DP=500;Dels=0.00;EFF=NON_SYNONYMOUS_CODING(MODERATE|MISSENSE|ttT/ttG|F1145L|1894|PLXNA2||CODING|NM_025179.3|18|1);FS=2.397;HaplotypeScore=9.8502;MLEAC=1;MLEAF=0.500;MQ=60.00;MQ0=0;MQRankSum=2.192;QD=12.92;ReadPosRankSum=0.429	chr1.208195587-208417665 ; 1q32.2 ; loss
PMCH	pro-melanin-concentrating hormone	0.111111	AC=1;AF=0.500;AN=2;BaseQRankSum=-13.023;DP=500;Dels=0.00;EFF=DOWNSTREAM(MODIFIER||||165|PMCH||CODING|NM_002674.2||1),NON_SYNONYMOUS_CODING(MODERATE|MISSENSE|tCa/tTa|S543L|579|PARPBP||CODING|NM_017915.3|11|1);FS=7.637;HaplotypeScore=5.4790;MLEAC=1;MLEAF=0.500;MQ=60.00;MQ0=0;MQRankSum=-0.373;QD=12.65;ReadPosRankSum=0.689	chr12.102590236-102591614 ; 12q23.2 ; gain
PNMAL1	PNMA-like 1	0.0555556	AC=1;AF=0.500;AN=2;BaseQRankSum=-11.001;DP=500;Dels=0.00;EFF=INTRON(MODIFIER||||378|PNMAL1||CODING|NM_001103149.1|2|1),NON_SYNONYMOUS_CODING(MODERATE|MISSENSE|gCc/gTc|A404V|439|PNMAL1||CODING|NM_018215.3|2|1);FS=3.300;HaplotypeScore=5.6575;MLEAC=1;MLEAF=0.500;MQ=60.00;MQ0=0;MQRankSum=-0.072;QD=12.76;ReadPosRankSum=0.014	chr19.46969747-46974820 ; 19q13.32 ; gain
PNP	nucleoside phosphorylase	0.333333	AC=1;AF=0.500;AN=2;BaseQRankSum=5.578;DB;DP=500;Dels=0.00;EFF=NON_SYNONYMOUS_CODING(MODERATE|MISSENSE|Ggt/Agt|G51S|289|PNP||CODING|NM_000270.3|2|1);FS=1.070;HaplotypeScore=3.5513;MLEAC=1;MLEAF=0.500;MQ=60.00;MQ0=0;MQRankSum=-1.326;QD=13.97;ReadPosRankSum=-1.258	chr14.20937537-20946165 ; 14q11.2 ; gain
POM121L2	POM121 membrane glycoprotein-like 2 (rat)	0.0833333	AC=1;AF=0.500;AN=2;BaseQRankSum=-10.434;DP=500;Dels=0.00;EFF=NON_SYNONYMOUS_CODING(MODERATE|MISSENSE|Cca/Tca|P992S|1035|POM121L2||CODING|NM_033482.3|1|1);FS=0.000;HaplotypeScore=8.0772;MLEAC=1;MLEAF=0.500;MQ=60.00;MQ0=0;MQRankSum=0.684;QD=13.82;ReadPosRankSum=1.332	chr6.27276841-27280011 ; 6p22.1 ; gain
POP1	processing of precursor 1, ribonuclease P/MRP subunit (S. cerevisiae)	0.0555556	AC=1;AF=0.500;AN=2;BaseQRankSum=-0.902;DP=500;Dels=0.00;EFF=NON_SYNONYMOUS_CODING(MODERATE|MISSENSE|Ggt/Tgt|G90C|1024|POP1||CODING|NM_001145860.1|3|1),NON_SYNONYMOUS_CODING(MODERATE|MISSENSE|Ggt/Tgt|G90C|1024|POP1||CODING|NM_001145861.1|3|1),NON_SYNONYMOUS_CODING(MODERATE|MISSENSE|Ggt/Tgt|G90C|1024|POP1||CODING|NM_015029.2|3|1);FS=1.570;HaplotypeScore=11.2283;MLEAC=1;MLEAF=0.500;MQ=60.00;MQ0=0;MQ…	chr8.99129520-99172069 ; 8q22.2 ; gain
POTEC	POTE ankyrin domain family, member D; POTE ankyrin domain family, member C; POTE ankyrin domain family, member B	0.194444	AC=1;AF=0.500;AN=2;BaseQRankSum=-13.536;DB;DP=500;Dels=0.00;EFF=NON_SYNONYMOUS_CODING(MODERATE|MISSENSE|tGc/tAc|C72Y|542|POTEC||CODING|NM_001137671.1|1|1);FS=18.232;HaplotypeScore=11.7416;MLEAC=1;MLEAF=0.500;MQ=38.13;MQ0=33;MQRankSum=-14.624;QD=7.20;ReadPosRankSum=0.397	chr18.14511736-14543599 ; 18p11.21 ; gain
POU2F1	POU class 2 homeobox 1	0.111111	AC=1;AF=0.500;AN=2;BaseQRankSum=10.898;DP=500;Dels=0.00;EFF=DOWNSTREAM(MODIFIER||||703|POU2F1||CODING|NM_001198786.1||1),DOWNSTREAM(MODIFIER||||755|POU2F1||CODING|NM_001198783.1||1),DOWNSTREAM(MODIFIER||||766|POU2F1||CODING|NM_002697.3||1),DOWNSTREAM(MODIFIER|||||POU2F1||CODING|NR_037163.1||1),NON_SYNONYMOUS_CODING(MODERATE|MISSENSE|Aca/Gca|T146A|163|CD247||CODING|NM_000734.3|8|1),NON_SYNONYMOUS_…	chr1.167190065-167396582 ; 1q24.1 ; gain
POU4F1	POU class 4 homeobox 1	0.0833333	AC=2;AF=1.00;AN=2;BaseQRankSum=0.086;DP=467;Dels=0.00;EFF=INTRON(MODIFIER|||||POU4F1-AS1||NON_CODING|NR_047001.1|3|1),NON_SYNONYMOUS_CODING(MODERATE|MISSENSE|gCc/gTc|A48V|419|POU4F1||CODING|NM_006237.3|2|1);FS=0.000;HaplotypeScore=14.5446;MLEAC=2;MLEAF=1.00;MQ=60.00;MQ0=0;MQRankSum=-1.468;QD=26.00;ReadPosRankSum=-0.380	chr13.79173229-79177695 ; 13q31.1 ; gain
POU5F1B	POU class 5 homeobox 1B	0.0833333	AC=1;AF=0.500;AN=2;BaseQRankSum=-6.556;DP=500;Dels=0.00;EFF=NON_SYNONYMOUS_CODING(MODERATE|MISSENSE|Tgg/Cgg|W207R|359|POU5F1B||CODING|NM_001159542.1|1|1);FS=7.004;HaplotypeScore=10.5657;MLEAC=1;MLEAF=0.500;MQ=43.17;MQ0=3;MQRankSum=1.452;QD=12.26;ReadPosRankSum=0.835	chr8.128427856-128429441 ; 8q24.21 ; gain
POU6F2	POU class 6 homeobox 2	0.527778	AC=1;AF=0.500;AN=2;BaseQRankSum=-9.353;DP=500;Dels=0.00;EFF=NON_SYNONYMOUS_CODING(MODERATE|MISSENSE|gTg/gCg|V50A|655|POU6F2||CODING|NM_001166018.1|3|1),NON_SYNONYMOUS_CODING(MODERATE|MISSENSE|gTg/gCg|V50A|691|POU6F2||CODING|NM_007252.3|3|1);FS=0.000;HaplotypeScore=4.4067;MLEAC=1;MLEAF=0.500;MQ=60.00;MQ0=0;MQRankSum=0.586;QD=3.01;ReadPosRankSum=3.191	chr7.39017608-39504390 ; 7p14.1 ; loss
PPAPDC1A	phosphatidic acid phosphatase type 2 domain containing 1A	0.0833333	AC=1;AF=0.500;AN=2;BaseQRankSum=2.384;DP=500;Dels=0.00;EFF=NON_SYNONYMOUS_CODING(MODERATE|MISSENSE|ttA/ttT|L85F|271|PPAPDC1A||CODING|NM_001030059.1|3|1);FS=7.468;HaplotypeScore=9.6598;MLEAC=1;MLEAF=0.500;MQ=60.00;MQ0=0;MQRankSum=-1.483;QD=14.20;ReadPosRankSum=-0.722	chr10.122216465-122349367 ; 10q26.12 ; gain
PPARG	peroxisome proliferator-activated receptor gamma	0.0555556	AC=1;AF=0.500;AN=2;BaseQRankSum=-4.112;DP=500;Dels=0.00;EFF=INTRON(MODIFIER||||477|PPARG||CODING|NM_005037.5|1|1),INTRON(MODIFIER||||477|PPARG||CODING|NM_138711.3|2|1),INTRON(MODIFIER||||477|PPARG||CODING|NM_138712.3|2|1),NON_SYNONYMOUS_CODING(MODERATE|MISSENSE|Ggt/Tgt|G2C|505|PPARG||CODING|NM_015869.4|1|1);FS=1.442;HaplotypeScore=12.8635;MLEAC=1;MLEAF=0.500;MQ=59.94;MQ0=0;MQRankSum=-0.306;QD=13.…	chr3.12329348-12475855 ; 3p25.2 ; gain
PPFIA2	protein tyrosine phosphatase, receptor type, f polypeptide (PTPRF), interacting protein (liprin), alpha 2	0.138889	AC=1;AF=0.500;AN=2;BaseQRankSum=-10.090;DP=500;Dels=0.00;EFF=EXON(MODIFIER|||||PPFIA2||CODING|NR_038265.1|28|1),NON_SYNONYMOUS_CODING(MODERATE|MISSENSE|gCt/gTt|A1116V|1152|PPFIA2||CODING|NM_001220478.1|27|1),NON_SYNONYMOUS_CODING(MODERATE|MISSENSE|gCt/gTt|A1120V|1156|PPFIA2||CODING|NM_001220477.1|27|1),NON_SYNONYMOUS_CODING(MODERATE|MISSENSE|gCt/gTt|A1200V|1236|PPFIA2||CODING|NM_001220475.1|29|1)…	chr12.81652044-82153109 ; 12q21.31 ; gain
PPIL1	peptidylprolyl isomerase (cyclophilin)-like 1	0.0555556	AC=1;AF=0.500;AN=2;BaseQRankSum=-6.437;DP=500;Dels=0.00;EFF=NON_SYNONYMOUS_CODING(MODERATE|MISSENSE|tCc/tTc|S149F|166|PPIL1||CODING|NM_016059.4|4|1);FS=10.628;HaplotypeScore=9.3581;MLEAC=1;MLEAF=0.500;MQ=60.00;MQ0=0;MQRankSum=-2.048;QD=13.39;ReadPosRankSum=-0.261	chr6.36822605-36842800 ; 6p21.2 ; gain
PPP1R9A	protein phosphatase 1, regulatory (inhibitor) subunit 9A	0.0833333	AC=1;AF=0.500;AN=2;BaseQRankSum=-3.853;DP=500;Dels=0.00;EFF=INTRON(MODIFIER||||1253|PPP1R9A||CODING|NM_001166162.1|16|1),NON_SYNONYMOUS_CODING(MODERATE|MISSENSE|caG/caT|Q1004H|1098|PPP1R9A||CODING|NM_017650.2|15|1),NON_SYNONYMOUS_CODING(MODERATE|MISSENSE|caG/caT|Q1202H|1296|PPP1R9A||CODING|NM_001166161.1|17|1),NON_SYNONYMOUS_CODING(MODERATE|MISSENSE|caG/caT|Q1280H|1374|PPP1R9A||CODING|NM_00116616…	chr7.94536948-94925727 ; 7q21.3 ; gain
PRAME	preferentially expressed antigen in melanoma	0.583333	AC=2;AF=1.00;AN=2;BaseQRankSum=-0.619;DB;DP=500;Dels=0.00;EFF=NON_SYNONYMOUS_CODING(MODERATE|MISSENSE|Tgg/Cgg|W7R|509|PRAME||CODING|NM_006115.3|3|1),NON_SYNONYMOUS_CODING(MODERATE|MISSENSE|Tgg/Cgg|W7R|509|PRAME||CODING|NM_206953.1|2|1),NON_SYNONYMOUS_CODING(MODERATE|MISSENSE|Tgg/Cgg|W7R|509|PRAME||CODING|NM_206954.1|3|1),NON_SYNONYMOUS_CODING(MODERATE|MISSENSE|Tgg/Cgg|W7R|509|PRAME||CODING|NM_206…	chr22.22890122-22901696 ; 22q11.22 ; loss
PRCP	prolylcarboxypeptidase (angiotensinase C)	0.0555556	AC=1;AF=0.500;AN=2;BaseQRankSum=-3.440;DP=500;Dels=0.00;EFF=NON_SYNONYMOUS_CODING(MODERATE|MISSENSE|Gct/Tct|A152S|496|PRCP||CODING|NM_005040.2|4|1),NON_SYNONYMOUS_CODING(MODERATE|MISSENSE|Gct/Tct|A173S|517|PRCP||CODING|NM_199418.2|5|1);FS=2.483;HaplotypeScore=5.9938;MLEAC=1;MLEAF=0.500;MQ=60.00;MQ0=0;MQRankSum=-1.274;QD=1.67;ReadPosRankSum=-0.224	chr11.82535408-82611557 ; 11q14.1 ; gain
PRDM8	PR domain containing 8	0.0555556	AC=2;AF=1.00;AN=2;BaseQRankSum=-0.084;DP=500;Dels=0.00;EFF=NON_SYNONYMOUS_CODING(MODERATE|MISSENSE|gCg/gTg|A172V|689|PRDM8||CODING|NM_001099403.1|4|1),NON_SYNONYMOUS_CODING(MODERATE|MISSENSE|gCg/gTg|A172V|689|PRDM8||CODING|NM_020226.3|10|1);FS=24.995;HaplotypeScore=11.2291;MLEAC=2;MLEAF=1.00;MQ=59.83;MQ0=0;MQRankSum=3.181;QD=31.94;ReadPosRankSum=0.978	chr4.81106423-81125482 ; 4q21.21 ; gain
PRG4	proteoglycan 4	0.0555556	AC=1;AF=0.500;AN=2;BaseQRankSum=-5.508;DP=500;Dels=0.00;EFF=DOWNSTREAM(MODIFIER||||1270|PRG4||CODING|NM_001127710.1||1),DOWNSTREAM(MODIFIER||||1311|PRG4||CODING|NM_001127709.1||1),DOWNSTREAM(MODIFIER||||1363|PRG4||CODING|NM_001127708.1||1),DOWNSTREAM(MODIFIER||||1404|PRG4||CODING|NM_005807.3||1),INTRON(MODIFIER|||||MIR548F1||NON_CODING|NR_031642.1|2|1),NON_SYNONYMOUS_CODING(MODERATE|MISSENSE|Ggt/…	chr1.186265404-186283688 ; 1q31.1 ; gain
PRKAG3	protein kinase, AMP-activated, gamma 3 non-catalytic subunit	0.194444	AC=1;AF=0.500;AN=2;BaseQRankSum=2.020;DB;DP=500;Dels=0.00;EFF=NON_SYNONYMOUS_CODING(MODERATE|MISSENSE|Cca/Gca|P71A|489|PRKAG3||CODING|NM_017431.2|3|1);FS=45.862;HaplotypeScore=6.5602;MLEAC=1;MLEAF=0.500;MQ=60.00;MQ0=0;MQRankSum=1.863;QD=20.10;ReadPosRankSum=-1.142	chr2.219687105-219696512 ; 2q35 ; gain
PRKD1	protein kinase D1	0.194444	NA	chr14.30045686-30396899 ; 14q12 ; gain
PRKD2	protein kinase D2	0.0555556	AC=2;AF=1.00;AN=2;BaseQRankSum=3.034;DP=500;Dels=0.00;EFF=NON_SYNONYMOUS_CODING(MODERATE|MISSENSE|Acc/Ccc|T240P|721|PRKD2||CODING|NM_001079882.1|7|1),NON_SYNONYMOUS_CODING(MODERATE|MISSENSE|Acc/Ccc|T397P|878|PRKD2||CODING|NM_001079880.1|9|1),NON_SYNONYMOUS_CODING(MODERATE|MISSENSE|Acc/Ccc|T397P|878|PRKD2||CODING|NM_001079881.1|9|1),NON_SYNONYMOUS_CODING(MODERATE|MISSENSE|Acc/Ccc|T397P|878|PRKD2||…	chr19.47177572-47220384 ; 19q13.32 ; gain
PROP1	PROP paired-like homeobox 1	0.277778	AC=1;AF=0.500;AN=2;BaseQRankSum=5.024;DB;DP=500;Dels=0.00;EFF=NON_SYNONYMOUS_CODING(MODERATE|MISSENSE|Gcc/Acc|A142T|226|PROP1||CODING|NM_006261.4|3|1);FS=0.330;HaplotypeScore=4.1545;MLEAC=1;MLEAF=0.500;MQ=60.00;MQ0=0;MQRankSum=0.412;QD=11.74;ReadPosRankSum=-1.028	chr5.177419235-177423243 ; 5q35.3 ; loss
PROS1	protein S (alpha)	0.111111	AC=1;AF=0.500;AN=2;BaseQRankSum=14.504;DP=500;Dels=0.00;EFF=NON_SYNONYMOUS_CODING(MODERATE|MISSENSE|Ata/Gta|I244V|676|PROS1||CODING|NM_000313.3|8|1);FS=6.453;HaplotypeScore=6.5142;MLEAC=1;MLEAF=0.500;MQ=59.83;MQ0=0;MQRankSum=0.768;QD=11.88;ReadPosRankSum=1.221	chr3.93591880-93692934 ; 3q11.1 ; gain
PROX1	prospero homeobox 1	0.0555556	AC=1;AF=0.500;AN=2;BaseQRankSum=-5.836;DP=500;Dels=0.00;EFF=NON_SYNONYMOUS_CODING(MODERATE|MISSENSE|Ggc/Tgc|G474C|737|PROX1||CODING|NM_001270616.1|2|1),NON_SYNONYMOUS_CODING(MODERATE|MISSENSE|Ggc/Tgc|G474C|737|PROX1||CODING|NM_002763.4|2|1);FS=2.599;HaplotypeScore=6.6912;MLEAC=1;MLEAF=0.500;MQ=60.00;MQ0=0;MQRankSum=-0.851;QD=6.02;ReadPosRankSum=1.279	chr1.214161277-214214847 ; 1q32.3 ; loss
PRR23C	FLJ46210 protein	0.0555556	AC=1;AF=0.500;AN=2;BaseQRankSum=-11.861;DP=500;Dels=0.00;EFF=NON_SYNONYMOUS_CODING(MODERATE|MISSENSE|Gac/Aac|D75N|262|PRR23C||CODING|NM_001134657.1|1|1);FS=6.462;HaplotypeScore=3.8107;MLEAC=1;MLEAF=0.500;MQ=60.00;MQ0=0;MQRankSum=-1.385;QD=13.23;ReadPosRankSum=-0.093	chr3.138760943-138763734 ; 3q23 ; gain
PRTG	protogenin homolog (Gallus gallus)	0.0555556	AC=1;AF=0.500;AN=2;BaseQRankSum=-0.992;DP=500;Dels=0.00;EFF=NON_SYNONYMOUS_CODING(MODERATE|MISSENSE|Cgc/Agc|R717S|1150|PRTG||CODING|NM_173814.4|13|1);FS=8.676;HaplotypeScore=6.5463;MLEAC=1;MLEAF=0.500;MQ=59.97;MQ0=0;MQRankSum=-0.068;QD=12.72;ReadPosRankSum=1.143	chr15.55903738-56035177 ; 15q21.3 ; gain
PSG3	pregnancy specific beta-1-glycoprotein 3	0.0833333	NA	chr19.43225793-43244668 ; 19q13.2 ; gain
PSG9	pregnancy specific beta-1-glycoprotein 9	0.25	AC=1;AF=0.500;AN=2;BaseQRankSum=12.292;DB;DP=500;Dels=0.00;EFF=NON_SYNONYMOUS_CODING(MODERATE|MISSENSE|cGg/cAg|R313Q|426|PSG9||CODING|NM_002784.3|4|1);FS=1.563;HaplotypeScore=3.9932;MLEAC=1;MLEAF=0.500;MQ=42.80;MQ0=3;MQRankSum=-3.001;QD=8.67;ReadPosRankSum=1.977	chr19.43757434-43773682 ; 19q13.31 ; gain
PTPLAD1	protein tyrosine phosphatase-like A domain containing 1	0.0833333	AC=1;AF=0.500;AN=2;BaseQRankSum=0.824;DP=500;Dels=0.00;EFF=NON_SYNONYMOUS_CODING(MODERATE|MISSENSE|cGt/cAt|R278H|362|PTPLAD1||CODING|NM_016395.2|9|1);FS=4.839;HaplotypeScore=6.3796;MLEAC=1;MLEAF=0.500;MQ=60.00;MQ0=0;MQRankSum=0.603;QD=14.34;ReadPosRankSum=-1.544	chr15.65822826-65870693 ; 15q22.31 ; gain
PTPN21	protein tyrosine phosphatase, non-receptor type 21	0.0833333	NA	chr14.88932121-89021123 ; 14q31.3 ; gain
PTPN23	protein tyrosine phosphatase, non-receptor type 23	0.111111	NA	chr3.47422490-47454931 ; 3p21.31 ; gain
PTPRB	protein tyrosine phosphatase, receptor type, B	0.111111	AC=1;AF=0.500;AN=2;BaseQRankSum=5.099;DP=500;Dels=0.00;EFF=NON_SYNONYMOUS_CODING(MODERATE|MISSENSE|aCa/aGa|T444R|1907|PTPRB||CODING|NM_001206971.1|6|1),NON_SYNONYMOUS_CODING(MODERATE|MISSENSE|aCa/aGa|T534R|1907|PTPRB||CODING|NM_001206972.1|7|1),NON_SYNONYMOUS_CODING(MODERATE|MISSENSE|aCa/aGa|T534R|1997|PTPRB||CODING|NM_002837.4|7|1),NON_SYNONYMOUS_CODING(MODERATE|MISSENSE|aCa/aGa|T752R|2215|PTPRB…	chr12.70910631-71031220 ; 12q15 ; gain
PTPRR	protein tyrosine phosphatase, receptor type, R	0.0833333	AC=1;AF=0.500;AN=2;BaseQRankSum=-3.679;DP=500;Dels=0.00;EFF=EXON(MODIFIER|||||PTPRR||CODING|NR_073474.1|3|1),NON_SYNONYMOUS_CODING(MODERATE|MISSENSE|Gtg/Ttg|V160L|412|PTPRR||CODING|NM_130846.2|4|1),NON_SYNONYMOUS_CODING(MODERATE|MISSENSE|Gtg/Ttg|V199L|451|PTPRR||CODING|NM_001207016.1|5|1),NON_SYNONYMOUS_CODING(MODERATE|MISSENSE|Gtg/Ttg|V293L|545|PTPRR||CODING|NM_001207015.1|7|1),NON_SYNONYMOUS_CO…	chr12.71031852-71314584 ; 12q15 ; gain
PTS	6-pyruvoyltetrahydropterin synthase	0.0833333	AC=1;AF=0.500;AN=2;BaseQRankSum=-6.962;DP=500;Dels=0.00;EFF=NON_SYNONYMOUS_CODING(MODERATE|MISSENSE|aGt/aAt|S32N|145|PTS||CODING|NM_000317.2|2|1);FS=6.748;HaplotypeScore=3.5086;MLEAC=1;MLEAF=0.500;MQ=59.87;MQ0=0;MQRankSum=0.308;QD=14.40;ReadPosRankSum=-0.891	chr11.112097087-112104695 ; 11q23.1 ; gain
PVRL3	poliovirus receptor-related 3	0.0555556	AC=1;AF=0.500;AN=2;BaseQRankSum=1.415;DP=500;Dels=0.00;EFF=NON_SYNONYMOUS_CODING(MODERATE|MISSENSE|Tat/Aat|Y309N|487|PVRL3||CODING|NM_001243288.1|5|1),NON_SYNONYMOUS_CODING(MODERATE|MISSENSE|Tat/Aat|Y332N|366|PVRL3||CODING|NM_001243286.1|5|1),NON_SYNONYMOUS_CODING(MODERATE|MISSENSE|Tat/Aat|Y332N|549|PVRL3||CODING|NM_015480.2|5|1);FS=1.115;HaplotypeScore=4.4493;MLEAC=1;MLEAF=0.500;MQ=60.00;MQ0=0;M…	chr3.110790605-110913016 ; 3q13.13 ; gain
PWWP2A	PWWP domain containing 2A	0.0555556	NA	chr5.159502891-159546452 ; 5q33.3 ; gain
PYHIN1	pyrin and HIN domain family, member 1	0.138889	AC=1;AF=0.500;AN=2;BaseQRankSum=0.700;DP=500;Dels=0.00;EFF=NON_SYNONYMOUS_CODING(MODERATE|MISSENSE|aaG/aaT|K444N|452|PYHIN1||CODING|NM_198930.3|7|1),NON_SYNONYMOUS_CODING(MODERATE|MISSENSE|aaG/aaT|K444N|483|PYHIN1||CODING|NM_198928.4|7|1),NON_SYNONYMOUS_CODING(MODERATE|MISSENSE|aaG/aaT|K453N|461|PYHIN1||CODING|NM_198929.4|7|1),NON_SYNONYMOUS_CODING(MODERATE|MISSENSE|aaG/aaT|K453N|492|PYHIN1||CODI…	chr1.158901336-158946849 ; 1q23.1 ; gain
PZP	pregnancy-zone protein	0.388889	AC=1;AF=0.500;AN=2;BaseQRankSum=-0.534;DB;DP=500;Dels=0.00;EFF=NON_SYNONYMOUS_CODING(MODERATE|MISSENSE|aTc/aAc|I1443N|1482|PZP||CODING|NM_002864.2|34|1);FS=5.395;HaplotypeScore=4.8958;MLEAC=1;MLEAF=0.500;MQ=59.95;MQ0=0;MQRankSum=-0.329;QD=17.16;ReadPosRankSum=1.561	chr12.9301435-9360966 ; 12p13.31 ; gain
QRFPR	pyroglutamylated RFamide peptide receptor	0.361111	AC=1;AF=0.500;AN=2;BaseQRankSum=-5.923;DB;DP=500;Dels=0.00;EFF=NON_SYNONYMOUS_CODING(MODERATE|MISSENSE|Ttt/Gtt|F61V|431|QRFPR||CODING|NM_198179.2|1|1);FS=13.985;HaplotypeScore=10.2208;MLEAC=1;MLEAF=0.500;MQ=60.00;MQ0=0;MQRankSum=0.944;QD=4.83;ReadPosRankSum=0.767	chr4.122249796-122302181 ; 4q27 ; loss
RAB27A	RAB27A, member RAS oncogene family	0.0555556	AC=1;AF=0.500;AN=2;BaseQRankSum=-11.863;DP=500;Dels=0.00;EFF=NON_SYNONYMOUS_CODING(MODERATE|MISSENSE|aGc/aTc|S83I|221|RAB27A||CODING|NM_004580.4|4|1),NON_SYNONYMOUS_CODING(MODERATE|MISSENSE|aGc/aTc|S83I|221|RAB27A||CODING|NM_183234.2|5|1),NON_SYNONYMOUS_CODING(MODERATE|MISSENSE|aGc/aTc|S83I|221|RAB27A||CODING|NM_183235.2|5|1),NON_SYNONYMOUS_CODING(MODERATE|MISSENSE|aGc/aTc|S83I|221|RAB27A||CODING…	chr15.55495163-55582013 ; 15q21.3 ; gain
RAD54B	RAD54 homolog B (S. cerevisiae)	0.0833333	AC=1;AF=0.500;AN=2;BaseQRankSum=-9.312;DP=500;Dels=0.00;EFF=NON_SYNONYMOUS_CODING(MODERATE|MISSENSE|gGa/gTa|G547V|726|RAD54B||CODING|NM_001205263.1|10|1),NON_SYNONYMOUS_CODING(MODERATE|MISSENSE|gGa/gTa|G731V|910|RAD54B||CODING|NM_012415.3|12|1);FS=11.186;HaplotypeScore=15.5280;MLEAC=1;MLEAF=0.500;MQ=59.95;MQ0=0;MQRankSum=1.505;QD=2.57;ReadPosRankSum=0.428	chr8.95384187-95487343 ; 8q22.1 ; gain
RAD54L2	RAD54-like 2 (S. cerevisiae)	0.166667	AC=1;AF=0.500;AN=2;BaseQRankSum=-3.499;DP=500;Dels=0.00;EFF=NON_SYNONYMOUS_CODING(MODERATE|MISSENSE|Agc/Ggc|S1000G|1467|RAD54L2||CODING|NM_015106.2|18|1);FS=0.470;HaplotypeScore=15.4383;MLEAC=1;MLEAF=0.500;MQ=60.00;MQ0=0;MQRankSum=-3.094;QD=13.08;ReadPosRankSum=-1.589	chr3.51575595-51697612 ; 3p21.2 ; gain
RAET1E	retinoic acid early transcript 1E	0.472222	AC=1;AF=0.500;AN=2;BaseQRankSum=-2.898;DB;DP=500;Dels=0.00;EFF=INTRON(MODIFIER|||||LOC100652739||NON_CODING|NR_045126.1|1|1),NON_SYNONYMOUS_CODING(MODERATE|MISSENSE|aCc/aTc|T106I|227|RAET1E||CODING|NM_001243325.1|3|1),NON_SYNONYMOUS_CODING(MODERATE|MISSENSE|aCc/aTc|T142I|209|RAET1E||CODING|NM_001243327.1|3|1),NON_SYNONYMOUS_CODING(MODERATE|MISSENSE|aCc/aTc|T142I|212|RAET1E||CODING|NM_001243328.1|…	chr6.150204510-150217195 ; 6q25.1 ; loss
RALGAPA2	chromosome 20 open reading frame 74	0.0555556	NA	chr20.20370271-20693266 ; 20p11.23 ; gain
RALYL	RALY RNA binding protein-like	0.111111	AC=1;AF=0.500;AN=2;BaseQRankSum=7.778;DP=500;Dels=0.00;EFF=NON_SYNONYMOUS_CODING(MODERATE|MISSENSE|cGt/cCt|R22P|291|RALYL||CODING|NM_001100392.1|3|1),NON_SYNONYMOUS_CODING(MODERATE|MISSENSE|cGt/cCt|R22P|291|RALYL||CODING|NM_001100393.1|2|1),NON_SYNONYMOUS_CODING(MODERATE|MISSENSE|cGt/cCt|R22P|291|RALYL||CODING|NM_173848.5|2|1),NON_SYNONYMOUS_CODING(MODERATE|MISSENSE|cGt/cCt|R35P|304|RALYL||CODING…	chr8.85095452-85834078 ; 8q21.2 ; gain
RASAL1	RAS protein activator like 1 (GAP1 like)	0.111111	AC=2;AF=1.00;AN=2;BaseQRankSum=-2.159;DP=500;Dels=0.00;EFF=DOWNSTREAM(MODIFIER||||776|RASAL1||CODING|NM_001193521.1||1),DOWNSTREAM(MODIFIER||||804|RASAL1||CODING|NM_004658.2||1),DOWNSTREAM(MODIFIER||||806|RASAL1||CODING|NM_001193520.1||1),NON_SYNONYMOUS_CODING(MODERATE|MISSENSE|tCc/tAc|S566Y|620|DTX1||CODING|NM_004416.2|9|1);FS=15.501;HaplotypeScore=8.9060;MLEAC=2;MLEAF=1.00;MQ=60.00;MQ0=0;MQRank…	chr12.113536623-113574044 ; 12q24.13 ; gain
RBBP8	retinoblastoma binding protein 8	0.138889	NA	chr18.20513294-20606449 ; 18q11.2 ; gain
RBL1	retinoblastoma-like 1 (p107)	0.0555556	AC=1;AF=0.500;AN=2;BaseQRankSum=8.497;DP=500;Dels=0.00;EFF=NON_SYNONYMOUS_CODING(MODERATE|MISSENSE|tAt/tTt|Y353F|1014|RBL1||CODING|NM_183404.1|8|1),NON_SYNONYMOUS_CODING(MODERATE|MISSENSE|tAt/tTt|Y353F|1068|RBL1||CODING|NM_002895.2|8|1);FS=7.848;HaplotypeScore=5.4726;MLEAC=1;MLEAF=0.500;MQ=60.00;MQ0=0;MQRankSum=0.485;QD=13.14;ReadPosRankSum=-0.433	chr20.35626177-35724410 ; 20q11.23 ; gain
RBL2	retinoblastoma-like 2 (p130)	0.138889	AC=1;AF=0.500;AN=2;BaseQRankSum=-5.315;DP=500;Dels=0.00;EFF=DOWNSTREAM(MODIFIER||||1139|RBL2||CODING|NM_005611.3||1),NON_SYNONYMOUS_CODING(MODERATE|MISSENSE|gaA/gaT|E260D|292|AKTIP||CODING|NM_001012398.1|10|1),NON_SYNONYMOUS_CODING(MODERATE|MISSENSE|gaA/gaT|E260D|292|AKTIP||CODING|NM_022476.2|10|1);FS=364.926;HaplotypeScore=2.8645;MLEAC=1;MLEAF=0.500;MQ=57.68;MQ0=0;MQRankSum=-6.955;QD=5.57;ReadPo…	chr16.53468350-53525560 ; 16q12.2 ; loss
RCSD1	RCSD domain containing 1	0.138889	AC=1;AF=0.500;AN=2;BaseQRankSum=-12.418;DP=500;Dels=0.00;EFF=NON_SYNONYMOUS_CODING(MODERATE|MISSENSE|Gac/Tac|D272Y|416|RCSD1||CODING|NM_052862.3|6|1);FS=5.685;HaplotypeScore=12.2844;MLEAC=1;MLEAF=0.500;MQ=60.00;MQ0=0;MQRankSum=0.864;QD=12.71;ReadPosRankSum=-1.501	chr1.167599473-167675486 ; 1q24.2 ; gain
RDH8	retinol dehydrogenase 8 (all-trans)	0.166667	AC=1;AF=0.500;AN=2;BaseQRankSum=0.519;DB;DP=500;Dels=0.00;EFF=NON_SYNONYMOUS_CODING(MODERATE|MISSENSE|caC/caG|H156Q|331|RDH8||CODING|NM_015725.2|3|1);FS=19.138;HaplotypeScore=10.3323;MLEAC=1;MLEAF=0.500;MQ=60.00;MQ0=0;MQRankSum=-0.498;QD=14.38;ReadPosRankSum=0.846	chr19.10123924-10132954 ; 19p13.2 ; loss
RET	ret proto-oncogene	0.138889	AC=1;AF=0.500;AN=2;BaseQRankSum=-10.239;DP=500;Dels=0.00;EFF=NON_SYNONYMOUS_CODING(MODERATE|MISSENSE|Ctc/Gtc|L643V|1072|RET||CODING|NM_020630.4|11|1),NON_SYNONYMOUS_CODING(MODERATE|MISSENSE|Ctc/Gtc|L643V|1114|RET||CODING|NM_020975.4|11|1);FS=4.801;HaplotypeScore=3.9523;MLEAC=1;MLEAF=0.500;MQ=60.00;MQ0=0;MQRankSum=0.324;QD=15.43;ReadPosRankSum=0.707	chr10.43572516-43625797 ; 10q11.21 ; gain
REV1	REV1 homolog (S. cerevisiae)	0.0555556	AC=1;AF=0.500;AN=2;BaseQRankSum=8.162;DP=500;Dels=0.00;EFF=NON_SYNONYMOUS_CODING(MODERATE|MISSENSE|Ata/Gta|I160V|1250|REV1||CODING|NM_001037872.1|5|1),NON_SYNONYMOUS_CODING(MODERATE|MISSENSE|Ata/Gta|I160V|1251|REV1||CODING|NM_016316.2|5|1);FS=1.276;HaplotypeScore=5.7444;MLEAC=1;MLEAF=0.500;MQ=59.95;MQ0=0;MQRankSum=0.090;QD=4.05;ReadPosRankSum=-0.588	chr2.100016937-100106480 ; 2q11.2 ; loss
REXO2	REX2, RNA exonuclease 2 homolog (S. cerevisiae)	0.111111	AC=1;AF=0.500;AN=2;BaseQRankSum=-2.413;DP=500;Dels=0.00;EFF=NON_SYNONYMOUS_CODING(MODERATE|MISSENSE|gGg/gTg|G230V|237|REXO2||CODING|NM_015523.3|7|1);FS=2.736;HaplotypeScore=10.5416;MLEAC=1;MLEAF=0.500;MQ=59.91;MQ0=0;MQRankSum=-0.803;QD=24.11;ReadPosRankSum=-2.005	chr11.114310107-114321000 ; 11q23.2 ; gain
RGPD3	RANBP2-like and GRIP domain containing 5; RANBP2-like and GRIP domain containing 4; RANBP2-like and GRIP domain containing 3; RANBP2-like and GRIP domain containing 8; RANBP2-like and GRIP domain containing 7; RANBP2-like and GRIP domain containing 6	0.0555556	AC=1;AF=0.500;AN=2;BaseQRankSum=12.432;DP=500;Dels=0.00;EFF=NON_SYNONYMOUS_CODING(MODERATE|MISSENSE|Ggt/Agt|G1230S|1758|RGPD3||CODING|NM_001144013.1|20|1);FS=3.066;HaplotypeScore=7.5158;MLEAC=1;MLEAF=0.500;MQ=33.69;MQ0=9;MQRankSum=4.185;QD=12.55;ReadPosRankSum=-0.554	chr2.107021135-107084801 ; 2q12.2 ; gain
RIMBP2	RIMS binding protein 2	0.111111	AC=1;AF=0.500;AN=2;BaseQRankSum=-11.095;DP=500;Dels=0.00;EFF=NON_SYNONYMOUS_CODING(MODERATE|MISSENSE|Ctc/Ttc|L862F|1052|RIMBP2||CODING|NM_015347.4|14|1);FS=3.439;HaplotypeScore=14.0344;MLEAC=1;MLEAF=0.500;MQ=60.00;MQ0=0;MQRankSum=-0.550;QD=15.56;ReadPosRankSum=-0.267	chr12.130880680-131002410 ; 12q24.33 ; gain
RIMS2	regulating synaptic membrane exocytosis 2	0.0555556	NA	chr8.104512975-105266656 ; 8q22.3 ; gain
RIOK1	RIO kinase 1 (yeast)	0.138889	NA	chr6.7390061-7418270 ; 6p24.3 ; gain
RNASEL	ribonuclease L (2',5'-oligoisoadenylate synthetase-dependent)	0.0555556	AC=1;AF=0.500;AN=2;BaseQRankSum=-6.558;DP=500;Dels=0.00;EFF=NON_SYNONYMOUS_CODING(MODERATE|MISSENSE|Gat/Aat|D541N|741|RNASEL||CODING|NM_021133.3|4|1);FS=0.365;HaplotypeScore=3.6627;MLEAC=1;MLEAF=0.500;MQ=60.00;MQ0=0;MQRankSum=0.372;QD=21.56;ReadPosRankSum=0.812	chr1.182542768-182558394 ; 1q25.3 ; gain
RNF144B	ring finger protein 144B	0.222222	AC=1;AF=0.500;AN=2;BaseQRankSum=6.512;DP=500;Dels=0.00;EFF=NON_SYNONYMOUS_CODING(MODERATE|MISSENSE|tGt/tCt|C126S|303|RNF144B||CODING|NM_182757.3|5|1);FS=4.474;HaplotypeScore=4.5543;MLEAC=1;MLEAF=0.500;MQ=59.99;MQ0=0;MQRankSum=2.234;QD=14.60;ReadPosRankSum=0.002	chr6.18387580-18469105 ; 6p22.3 ; gain
RNF182	ring finger protein 182	0.111111	AC=1;AF=0.500;AN=2;BaseQRankSum=0.786;DP=499;Dels=0.00;EFF=NON_SYNONYMOUS_CODING(MODERATE|MISSENSE|tGc/tCc|C173S|247|RNF182||CODING|NM_001165032.1|4|1),NON_SYNONYMOUS_CODING(MODERATE|MISSENSE|tGc/tCc|C173S|247|RNF182||CODING|NM_001165033.1|2|1),NON_SYNONYMOUS_CODING(MODERATE|MISSENSE|tGc/tCc|C173S|247|RNF182||CODING|NM_001165034.1|3|1),NON_SYNONYMOUS_CODING(MODERATE|MISSENSE|tGc/tCc|C173S|247|RNF…	chr6.13924676-13980240 ; 6p23 ; gain
RNMT	RNA (guanine-7-) methyltransferase	0.138889	NA	chr18.13726703-13764554 ; 18p11.21 ; gain
ROCK1	similar to Rho-associated, coiled-coil containing protein kinase 1; Rho-associated, coiled-coil containing protein kinase 1	0.0833333	AC=1;AF=0.500;AN=2;BaseQRankSum=11.592;DP=499;Dels=0.00;EFF=NON_SYNONYMOUS_CODING(MODERATE|MISSENSE|cGt/cAt|R403H|1354|ROCK1||CODING|NM_005406.2|10|1);FS=1.458;HaplotypeScore=6.6073;MLEAC=1;MLEAF=0.500;MQ=59.96;MQ0=0;MQRankSum=0.551;QD=14.44;ReadPosRankSum=-1.222	chr18.18529702-18691812 ; 18q11.1 ; gain
RP1	retinitis pigmentosa 1 (autosomal dominant)	0.361111	AC=1;AF=0.500;AN=2;BaseQRankSum=-9.258;DP=500;Dels=0.00;EFF=NON_SYNONYMOUS_CODING(MODERATE|MISSENSE|Cct/Tct|P32S|2156|RP1||CODING|NM_006269.1|2|1);FS=4.263;HaplotypeScore=9.5068;MLEAC=1;MLEAF=0.500;MQ=59.94;MQ0=1;MQRankSum=-0.895;QD=12.91;ReadPosRankSum=1.700 , AC=1;AF=0.500;AN=2;BaseQRankSum=3.403;DB;DP=500;Dels=0.00;EFF=NON_SYNONYMOUS_CODING(MODERATE|MISSENSE|Tct/Cct|S1691P|2156|RP1||CODING|NM_…	chr8.55528626-55543394 ; 8q12.1 ; loss
RPS6KA2	ribosomal protein S6 kinase, 90kDa, polypeptide 2; hypothetical LOC100127984	0.0555556	AC=1;AF=0.500;AN=2;BaseQRankSum=-12.943;DP=499;Dels=0.00;EFF=DOWNSTREAM(MODIFIER|||||MIR1913||NON_CODING|NR_031734.1||1),NON_SYNONYMOUS_CODING(MODERATE|MISSENSE|Ctg/Atg|L185M|733|RPS6KA2||CODING|NM_021135.4|6|1),NON_SYNONYMOUS_CODING(MODERATE|MISSENSE|Ctg/Atg|L193M|741|RPS6KA2||CODING|NM_001006932.1|7|1);FS=4.448;HaplotypeScore=5.5167;MLEAC=1;MLEAF=0.500;MQ=59.99;MQ0=0;MQRankSum=0.344;QD=10.74;Re…	chr6.166822853-167275771 ; 6q27 ; loss
RSPH3	radial spoke 3 homolog (Chlamydomonas)	0.222222	AC=1;AF=0.500;AN=2;BaseQRankSum=-8.551;DB;DP=500;Dels=0.00;EFF=NON_SYNONYMOUS_CODING(MODERATE|MISSENSE|aTg/aCg|M439T|560|RSPH3||CODING|NM_031924.4|7|1);FS=1.861;HaplotypeScore=3.5968;MLEAC=1;MLEAF=0.500;MQ=60.00;MQ0=0;MQRankSum=-0.944;QD=13.60;ReadPosRankSum=0.401 , AC=1;AF=0.500;AN=2;BaseQRankSum=14.235;DB;DP=500;Dels=0.00;EFF=NON_SYNONYMOUS_CODING(MODERATE|MISSENSE|cGg/cAg|R213Q|560|RSPH3||CODI…	chr6.159398265-159421198 ; 6q25.3 ; loss
RSU1	Ras suppressor protein 1	0.0555556	AC=1;AF=0.500;AN=2;BaseQRankSum=9.912;DP=500;Dels=0.00;EFF=NON_SYNONYMOUS_CODING(MODERATE|MISSENSE|aAc/aGc|N144S|277|RSU1||CODING|NM_012425.3|6|1),NON_SYNONYMOUS_CODING(MODERATE|MISSENSE|aAc/aGc|N91S|224|RSU1||CODING|NM_152724.2|5|1);FS=1.069;HaplotypeScore=5.3236;MLEAC=1;MLEAF=0.500;MQ=50.97;MQ0=0;MQRankSum=0.516;QD=13.92;ReadPosRankSum=1.025	chr10.16632616-16859453 ; 10p13 ; gain
S100A6	S100 calcium binding protein A6	0.166667	NA	chr1.153507075-153508717 ; 1q21.3 ; gain
S100A8	S100 calcium binding protein A8	0.111111	AC=1;AF=0.500;AN=2;BaseQRankSum=-5.772;DP=500;Dels=0.00;EFF=NON_SYNONYMOUS_CODING(MODERATE|MISSENSE|Gat/Tat|D32Y|93|S100A8||CODING|NM_002964.4|2|1);FS=5.911;HaplotypeScore=3.7947;MLEAC=1;MLEAF=0.500;MQ=59.93;MQ0=0;MQRankSum=-0.256;QD=10.08;ReadPosRankSum=5.654	chr1.153362507-153363664 ; 1q21.3 ; gain
SACS	spastic ataxia of Charlevoix-Saguenay (sacsin)	0.138889	NA	chr13.23902964-24007841 ; 13q12.12 ; gain
SALL3	sal-like 3 (Drosophila)	0.166667	AC=1;AF=0.500;AN=2;BaseQRankSum=-4.300;DP=500;Dels=0.00;EFF=NON_SYNONYMOUS_CODING(MODERATE|MISSENSE|Ctg/Atg|L793M|1300|SALL3||CODING|NM_171999.3|2|1);FS=6.545;HaplotypeScore=3.4665;MLEAC=1;MLEAF=0.500;MQ=60.00;MQ0=0;MQRankSum=0.161;QD=15.15;ReadPosRankSum=1.230	chr18.76740274-76758969 ; 18q23 ; gain
SAMSN1	SAM domain, SH3 domain and nuclear localization signals 1	0.0555556	AC=1;AF=0.500;AN=2;BaseQRankSum=-3.560;DP=500;Dels=0.00;EFF=EXON(MODIFIER|||||SAMSN1-AS1||NON_CODING|NR_046512.1|1|1),NON_SYNONYMOUS_CODING(MODERATE|MISSENSE|tgG/tgT|W62C|441|SAMSN1||CODING|NM_001256370.1|2|1);FS=2.482;HaplotypeScore=11.3836;MLEAC=1;MLEAF=0.500;MQ=59.99;MQ0=0;MQRankSum=0.002;QD=13.81;ReadPosRankSum=0.324	chr21.15857548-15955723 ; 21q11.2 ; gain
SCN3B	sodium channel, voltage-gated, type III, beta	0.0833333	AC=1;AF=0.500;AN=2;BaseQRankSum=-1.745;DP=500;Dels=0.00;EFF=NON_SYNONYMOUS_CODING(MODERATE|MISSENSE|Ggg/Agg|G90R|215|SCN3B||CODING|NM_001040151.1|4|1),NON_SYNONYMOUS_CODING(MODERATE|MISSENSE|Ggg/Agg|G90R|215|SCN3B||CODING|NM_018400.3|3|1);FS=3.463;HaplotypeScore=23.9103;MLEAC=1;MLEAF=0.500;MQ=60.00;MQ0=0;MQRankSum=0.102;QD=13.26;ReadPosRankSum=-0.366	chr11.123499894-123525315 ; 11q24.1 ; gain
SCN9A	sodium channel, voltage-gated, type IX, alpha subunit	0.0555556	AC=1;AF=0.500;AN=2;BaseQRankSum=-9.958;DP=500;Dels=0.00;EFF=NON_SYNONYMOUS_CODING(MODERATE|MISSENSE|Cct/Tct|P1800S|1977|SCN9A||CODING|NM_002977.3|27|1);FS=2.540;HaplotypeScore=5.8581;MLEAC=1;MLEAF=0.500;MQ=42.95;MQ0=3;MQRankSum=6.481;QD=13.84;ReadPosRankSum=-0.060	chr2.167051696-167232497 ; 2q24.3 ; loss
SCRIB	scribbled homolog (Drosophila)	0.0833333	AC=1;AF=0.500;AN=2;BaseQRankSum=-6.389;DP=500;Dels=0.00;EFF=NON_SYNONYMOUS_CODING(MODERATE|MISSENSE|aCc/aTc|T966I|1630|SCRIB||CODING|NM_015356.4|21|1),NON_SYNONYMOUS_CODING(MODERATE|MISSENSE|aCc/aTc|T966I|1655|SCRIB||CODING|NM_182706.4|21|1);FS=9.604;HaplotypeScore=14.8702;MLEAC=1;MLEAF=0.500;MQ=60.00;MQ0=0;MQRankSum=0.479;QD=15.14;ReadPosRankSum=0.997	chr8.144873089-144897549 ; 8q24.3 ; gain
SDAD1	SDA1 domain containing 1	0.0833333	AC=1;AF=0.500;AN=2;BaseQRankSum=1.957;DB;DP=500;Dels=0.00;EFF=NON_SYNONYMOUS_CODING(MODERATE|MISSENSE|gGa/gCa|G620A|687|SDAD1||CODING|NM_018115.2|21|1);FS=0.690;HaplotypeScore=4.9908;MLEAC=1;MLEAF=0.500;MQ=59.95;MQ0=0;MQRankSum=0.482;QD=12.77;ReadPosRankSum=0.099	chr4.76871067-76912113 ; 4q21.1 ; gain
SEC16A	SEC16 homolog A (S. cerevisiae)	0.0555556	NA	chr9.139334547-139378211 ; 9q34.3 ; gain
SEC31A	SEC31 homolog A (S. cerevisiae)	0.0555556	NA	chr4.83739813-83812419 ; 4q21.22 ; gain
SELP	selectin P (granule membrane protein 140kDa, antigen CD62)	0.111111	AC=1;AF=0.500;AN=2;BaseQRankSum=-7.436;DP=500;Dels=0.00;EFF=NON_SYNONYMOUS_CODING(MODERATE|MISSENSE|tCc/tTc|S56F|830|SELP||CODING|NM_003005.3|3|1);FS=14.180;HaplotypeScore=6.5941;MLEAC=1;MLEAF=0.500;MQ=60.00;MQ0=0;MQRankSum=-0.170;QD=13.64;ReadPosRankSum=0.495	chr1.169558087-169599377 ; 1q24.2 ; gain
SEMA3F	sema domain, immunoglobulin domain (Ig), short basic domain, secreted, (semaphorin) 3F	0.111111	AC=2;AF=1.00;AN=2;BaseQRankSum=-3.355;DP=359;Dels=0.00;EFF=NON_SYNONYMOUS_CODING(MODERATE|MISSENSE|Gcc/Tcc|A16S|785|SEMA3F||CODING|NM_004186.3|2|1);FS=1.149;HaplotypeScore=9.1184;MLEAC=2;MLEAF=1.00;MQ=60.00;MQ0=0;MQRankSum=-1.636;QD=27.85;ReadPosRankSum=0.019	chr3.50192847-50226508 ; 3p21.31 ; gain
SEMA6D	sema domain, transmembrane domain (TM), and cytoplasmic domain, (semaphorin) 6D	0.111111	AC=2;AF=1.00;AN=2;BaseQRankSum=-3.784;DP=500;Dels=0.00;EFF=NON_SYNONYMOUS_CODING(MODERATE|MISSENSE|Cag/Aag|Q1028K|1073|SEMA6D||CODING|NM_153618.1|19|1),NON_SYNONYMOUS_CODING(MODERATE|MISSENSE|Cag/Aag|Q953K|998|SEMA6D||CODING|NM_153616.1|17|1),NON_SYNONYMOUS_CODING(MODERATE|MISSENSE|Cag/Aag|Q966K|1011|SEMA6D||CODING|NM_001198999.1|20|1),NON_SYNONYMOUS_CODING(MODERATE|MISSENSE|Cag/Aag|Q966K|1011|SE…	chr15.47476402-48066420 ; 15q21.1 ; gain
SENP6	SUMO1/sentrin specific peptidase 6	0.0555556	AC=1;AF=0.500;AN=2;BaseQRankSum=3.080;DP=499;Dels=0.00;EFF=NON_SYNONYMOUS_CODING(MODERATE|MISSENSE|Act/Tct|T485S|1105|SENP6||CODING|NM_001100409.1|12|1),NON_SYNONYMOUS_CODING(MODERATE|MISSENSE|Act/Tct|T492S|1112|SENP6||CODING|NM_015571.2|13|1);FS=9.183;HaplotypeScore=0.9734;MLEAC=1;MLEAF=0.500;MQ=59.94;MQ0=0;MQRankSum=0.733;QD=13.90;ReadPosRankSum=-0.669	chr6.76311621-76427994 ; 6q14.1 ; gain
SERHL2	serine hydrolase-like 2	0.25	AC=1;AF=0.500;AN=2;BaseQRankSum=-9.475;DB;DP=500;Dels=0.00;EFF=EXON(MODIFIER|||||RRP7B||NON_CODING|NR_002184.2|7|1),NON_SYNONYMOUS_CODING(MODERATE|MISSENSE|Tgc/Cgc|C306R|314|SERHL2||CODING|NM_014509.3|12|1);FS=0.000;HaplotypeScore=5.6301;MLEAC=1;MLEAF=0.500;MQ=38.58;MQ0=22;MQRankSum=7.607;QD=12.32;ReadPosRankSum=-0.460	chr22.42949924-42970388 ; 22q13.2 ; loss
SERPINB10	serpin peptidase inhibitor, clade B (ovalbumin), member 10	0.305556	AC=1;AF=0.500;AN=2;BaseQRankSum=-6.042;DB;DP=500;Dels=0.00;EFF=NON_SYNONYMOUS_CODING(MODERATE|MISSENSE|Tct/Gct|S3A|397|SERPINB10||CODING|NM_005024.1|1|1);FS=4.371;HaplotypeScore=0.9933;MLEAC=1;MLEAF=0.500;MQ=60.00;MQ0=0;MQRankSum=1.588;QD=13.71;ReadPosRankSum=-1.226	chr18.61582744-61602476 ; 18q21.33 ; gain
SERPINB2	serpin peptidase inhibitor, clade B (ovalbumin), member 2	0.138889	AC=1;AF=0.500;AN=2;BaseQRankSum=-2.983;DP=500;Dels=0.00;EFF=NON_SYNONYMOUS_CODING(MODERATE|MISSENSE|Cca/Aca|P386T|415|SERPINB2||CODING|NM_001143818.1|9|1),NON_SYNONYMOUS_CODING(MODERATE|MISSENSE|Cca/Aca|P386T|415|SERPINB2||CODING|NM_002575.2|8|1);FS=0.000;HaplotypeScore=7.1126;MLEAC=1;MLEAF=0.500;MQ=60.00;MQ0=0;MQRankSum=-1.304;QD=12.04;ReadPosRankSum=0.330	chr18.61554938-61571124 ; 18q21.33 ; gain
SETD4	SET domain containing 4	0.0555556	AC=1;AF=0.500;AN=2;BaseQRankSum=-0.672;DP=500;Dels=0.00;EFF=EXON(MODIFIER|||||SETD4||CODING|NR_040086.1|11|1),EXON(MODIFIER|||||SETD4||CODING|NR_040087.1|9|1),NON_SYNONYMOUS_CODING(MODERATE|MISSENSE|aaG/aaT|K396N|440|SETD4||CODING|NM_017438.3|10|1);FS=2.920;HaplotypeScore=8.7992;MLEAC=1;MLEAF=0.500;MQ=60.00;MQ0=0;MQRankSum=-0.188;QD=18.31;ReadPosRankSum=1.808	chr21.37406838-37432819 ; 21q22.12 ; gain
SETD5	SET domain containing 5	0.0555556	AC=2;AF=1.00;AN=2;BaseQRankSum=-1.257;DP=500;Dels=0.00;EFF=NON_SYNONYMOUS_CODING(MODERATE|MISSENSE|caG/caT|Q640H|1442|SETD5||CODING|NM_001080517.1|15|1);FS=4.141;HaplotypeScore=4.1787;MLEAC=2;MLEAF=1.00;MQ=59.97;MQ0=0;MQRankSum=0.517;QD=34.42;ReadPosRankSum=-0.943	chr3.9439402-9519838 ; 3p25.3 ; gain
SFMBT2	Scm-like with four mbt domains 2	0.0833333	NA	chr10.7200585-7453448 ; 10p14 ; gain
SGIP1	SH3-domain GRB2-like (endophilin) interacting protein 1	0.25	AC=2;AF=1.00;AN=2;DB;DP=500;Dels=0.00;EFF=NON_SYNONYMOUS_CODING(MODERATE|MISSENSE|aAg/aGg|K131R|828|SGIP1||CODING|NM_032291.2|7|1);FS=0.000;HaplotypeScore=0.9967;MLEAC=2;MLEAF=1.00;MQ=60.00;MQ0=0;QD=24.36	chr1.66999824-67210768 ; 1p31.3 ; loss
SH2B1	SH2B adaptor protein 1	0.0833333	NA	chr16.28875077-28885534 ; 16p11.2 ; gain
SH3GL3	SH3-domain GRB2-like 3	0.166667	NA	chr15.84116090-84287493 ; 15q25.2 ; gain
SHARPIN	SHANK-associated RH domain interactor	0.0833333	AC=1;AF=0.500;AN=2;BaseQRankSum=-3.563;DP=500;Dels=0.00;EFF=DOWNSTREAM(MODIFIER||||387|SHARPIN||CODING|NM_030974.3||1),DOWNSTREAM(MODIFIER|||||SHARPIN||CODING|NR_038270.1||1),NON_SYNONYMOUS_CODING(MODERATE|MISSENSE|caG/caC|Q265H|325|CYC1||CODING|NM_001916.3|6|1);FS=4.630;HaplotypeScore=1.7719;MLEAC=1;MLEAF=0.500;MQ=59.92;MQ0=1;MQRankSum=0.972;QD=18.06;ReadPosRankSum=-0.045	chr8.145153535-145159140 ; 8q24.3 ; gain
SHQ1	SHQ1 homolog (S. cerevisiae)	0.416667	AC=1;AF=0.500;AN=2;BaseQRankSum=-10.032;DB;DP=500;Dels=0.00;EFF=NON_SYNONYMOUS_CODING(MODERATE|MISSENSE|aGt/aAt|S489N|577|SHQ1||CODING|NM_018130.2|11|1);FS=0.736;HaplotypeScore=1.7329;MLEAC=1;MLEAF=0.500;MQ=60.00;MQ0=0;MQRankSum=1.386;QD=13.36;ReadPosRankSum=-1.670	chr3.72798427-72897598 ; 3p13 ; gain
SIGLEC11	sialic acid binding Ig-like lectin 11	0.0555556	NA	chr19.50452249-50464429 ; 19q13.33 ; gain
SIGLEC12	sialic acid binding Ig-like lectin 12	0.25	AC=1;AF=0.500;AN=2;BaseQRankSum=-1.183;DB;DP=500;Dels=0.00;EFF=NON_SYNONYMOUS_CODING(MODERATE|MISSENSE|cCa/cAa|P428Q|477|SIGLEC12||CODING|NM_033329.1|7|1),NON_SYNONYMOUS_CODING(MODERATE|MISSENSE|cCa/cAa|P546Q|595|SIGLEC12||CODING|NM_053003.2|8|1);FS=3.818;HaplotypeScore=13.9415;MLEAC=1;MLEAF=0.500;MQ=60.00;MQ0=0;MQRankSum=0.207;QD=14.43;ReadPosRankSum=-1.068	chr19.51994612-52005043 ; 19q13.41 ; loss
SLC12A1	solute carrier family 12 (sodium/potassium/chloride transporters), member 1	0.305556	AC=1;AF=0.500;AN=2;BaseQRankSum=-6.910;DP=488;Dels=0.00;EFF=NON_SYNONYMOUS_CODING(MODERATE|MISSENSE|Gtt/Att|V614I|1099|SLC12A1||CODING|NM_000338.2|15|1),NON_SYNONYMOUS_CODING(MODERATE|MISSENSE|Gtt/Att|V614I|1099|SLC12A1||CODING|NM_001184832.1|15|1);FS=2.981;HaplotypeScore=10.5834;MLEAC=1;MLEAF=0.500;MQ=59.82;MQ0=0;MQRankSum=-0.720;QD=11.32;ReadPosRankSum=14.701	chr15.48498497-48596275 ; 15q21.1 ; gain
SLC13A2	solute carrier family 13 (sodium-dependent dicarboxylate transporter), member 2	0.388889	AC=1;AF=0.500;AN=2;BaseQRankSum=5.693;DB;DP=500;Dels=0.00;EFF=EXON(MODIFIER|||||SLC13A2||CODING|NR_027384.1|13|1),NON_SYNONYMOUS_CODING(MODERATE|MISSENSE|Atc/Gtc|I550V|592|SLC13A2||CODING|NM_003984.3|12|1),NON_SYNONYMOUS_CODING(MODERATE|MISSENSE|Atc/Gtc|I599V|641|SLC13A2||CODING|NM_001145975.1|12|1);FS=0.332;HaplotypeScore=6.0463;MLEAC=1;MLEAF=0.500;MQ=60.00;MQ0=0;MQRankSum=-0.532;QD=11.36;ReadPo…	chr17.26800663-26824798 ; 17q11.2 ; loss
SLC17A8	solute carrier family 17 (sodium-dependent inorganic phosphate cotransporter), member 8	0.111111	AC=2;AF=1.00;AN=2;BaseQRankSum=2.326;DP=500;Dels=0.00;EFF=NON_SYNONYMOUS_CODING(MODERATE|MISSENSE|gGc/gAc|G130D|539|SLC17A8||CODING|NM_001145288.1|3|1),NON_SYNONYMOUS_CODING(MODERATE|MISSENSE|gGc/gAc|G130D|589|SLC17A8||CODING|NM_139319.2|3|1);FS=0.000;HaplotypeScore=4.8647;MLEAC=2;MLEAF=1.00;MQ=60.00;MQ0=0;MQRankSum=-1.389;QD=33.43;ReadPosRankSum=0.156	chr12.100750856-100815837 ; 12q23.1 ; gain
SLC25A26	solute carrier family 25, member 26	0.111111	AC=1;AF=0.500;AN=2;BaseQRankSum=-5.615;DP=500;Dels=0.00;EFF=DOWNSTREAM(MODIFIER||||186|SLC25A26||CODING|NM_001164796.1||1),DOWNSTREAM(MODIFIER||||274|SLC25A26||CODING|NM_173471.3||1),DOWNSTREAM(MODIFIER|||||SLC25A26||CODING|NR_028475.1||1),NON_SYNONYMOUS_CODING(MODERATE|MISSENSE|Gag/Aag|E1035K|1093|LRIG1||CODING|NM_015541.2|19|1);FS=9.052;HaplotypeScore=10.5943;MLEAC=1;MLEAF=0.500;MQ=60.00;MQ0=0;…	chr3.66119284-66429351 ; 3p14.1 ; gain
SLC25A3	solute carrier family 25 (mitochondrial carrier; phosphate carrier), member 3	0.0833333	NA	chr12.98987402-98995778 ; 12q23.1 ; gain
SLC26A10	RhoA/RAC/CDC42 exchange factor; solute carrier family 26, member 10	0.0555556	AC=1;AF=0.500;AN=2;BaseQRankSum=12.571;DP=500;Dels=0.00;EFF=DOWNSTREAM(MODIFIER||||563|SLC26A10||CODING|NM_133489.2||1),NON_SYNONYMOUS_CODING(MODERATE|MISSENSE|tAc/tGc|Y170C|478|B4GALNT1||CODING|NM_001276468.1|5|1),NON_SYNONYMOUS_CODING(MODERATE|MISSENSE|tAc/tGc|Y225C|328|B4GALNT1||CODING|NM_001276469.1|6|1),NON_SYNONYMOUS_CODING(MODERATE|MISSENSE|tAc/tGc|Y225C|533|B4GALNT1||CODING|NM_001478.4|6|…	chr12.58013692-58019934 ; 12q13.3 ; gain
SLC26A8	solute carrier family 26, member 8	0.388889	AC=1;AF=0.500;AN=2;BaseQRankSum=10.220;DB;DP=500;Dels=0.00;EFF=NON_SYNONYMOUS_CODING(MODERATE|MISSENSE|Gtg/Atg|V73M|865|SLC26A8||CODING|NM_138718.2|3|1),NON_SYNONYMOUS_CODING(MODERATE|MISSENSE|Gtg/Atg|V73M|970|SLC26A8||CODING|NM_001193476.1|3|1),NON_SYNONYMOUS_CODING(MODERATE|MISSENSE|Gtg/Atg|V73M|970|SLC26A8||CODING|NM_052961.3|3|1);FS=6.479;HaplotypeScore=5.9381;MLEAC=1;MLEAF=0.500;MQ=60.00;MQ0…	chr6.35911290-35992413 ; 6p21.31 ; gain
SLC29A3	solute carrier family 29 (nucleoside transporters), member 3; Sp9 transcription factor homolog (mouse)	0.472222	AC=1;AF=0.500;AN=2;BaseQRankSum=-3.546;DB;DP=500;Dels=0.00;EFF=EXON(MODIFIER|||||SLC29A3||CODING|NR_033413.1|2|1),EXON(MODIFIER|||||SLC29A3||CODING|NR_033414.1|2|1),NON_SYNONYMOUS_CODING(MODERATE|MISSENSE|Aga/Gga|R18G|258|SLC29A3||CODING|NM_001174098.1|2|1),NON_SYNONYMOUS_CODING(MODERATE|MISSENSE|Aga/Gga|R18G|475|SLC29A3||CODING|NM_018344.5|2|1);FS=6.910;HaplotypeScore=8.9095;MLEAC=1;MLEAF=0.500;…	chr10.73079009-73123147 ; 10q22.1 ; gain
SLC2A3	solute carrier family 2 (facilitated glucose transporter), member 3	0.0833333	AC=1;AF=0.500;AN=2;BaseQRankSum=-8.929;DP=500;Dels=0.00;EFF=NON_SYNONYMOUS_CODING(MODERATE|MISSENSE|aGa/aTa|R262I|496|SLC2A3||CODING|NM_006931.2|6|1);FS=5.786;HaplotypeScore=5.9313;MLEAC=1;MLEAF=0.500;MQ=37.15;MQ0=5;MQRankSum=10.301;QD=10.59;ReadPosRankSum=-1.682	chr12.8071823-8088892 ; 12p13.31 ; gain
SLC35F1	solute carrier family 35, member F1	0.0555556	AC=1;AF=0.500;AN=2;BaseQRankSum=-11.098;DP=500;Dels=0.01;EFF=NON_SYNONYMOUS_CODING(MODERATE|MISSENSE|aCc/aAc|T358N|408|SLC35F1||CODING|NM_001029858.3|8|1);FS=27.511;HaplotypeScore=25.0896;MLEAC=1;MLEAF=0.500;MQ=60.00;MQ0=0;MQRankSum=-0.175;QD=19.75;ReadPosRankSum=1.103	chr6.118228688-118638839 ; 6q22.1 ; loss
SLC5A3	solute carrier family 5 (sodium/myo-inositol cotransporter), member 3	0.166667	NA	chr21.35445869-35478561 ; 21q22.11 ; gain
SLC7A2	solute carrier family 7 (cationic amino acid transporter, y+ system), member 2	0.277778	AC=1;AF=0.500;AN=2;BaseQRankSum=4.836;DB;DP=500;Dels=0.00;EFF=INTRON(MODIFIER||||658|SLC7A2||CODING|NM_001008539.3|1|1),NON_SYNONYMOUS_CODING(MODERATE|MISSENSE|Gac/Cac|D28H|697|SLC7A2||CODING|NM_003046.5|1|1),NON_SYNONYMOUS_CODING(MODERATE|MISSENSE|Gac/Cac|D28H|698|SLC7A2||CODING|NM_001164771.1|1|1);FS=0.000;HaplotypeScore=4.8373;MLEAC=1;MLEAF=0.500;MQ=59.89;MQ0=0;MQRankSum=-0.683;QD=18.84;ReadPo…	chr8.17354596-17428077 ; 8p22 ; gain
SLC9A9	solute carrier family 9 (sodium/hydrogen exchanger), member 9	0.194444	AC=1;AF=0.500;AN=2;BaseQRankSum=-8.534;DB;DP=500;Dels=0.00;EFF=NON_SYNONYMOUS_CODING(MODERATE|MISSENSE|Ata/Gta|I589V|645|SLC9A9||CODING|NM_173653.3|16|1);FS=0.322;HaplotypeScore=11.8810;MLEAC=1;MLEAF=0.500;MQ=60.00;MQ0=0;MQRankSum=-0.118;QD=12.37;ReadPosRankSum=1.870	chr3.142984063-143567373 ; 3q24 ; gain
SLCO5A1	solute carrier organic anion transporter family, member 5A1	0.0833333	AC=1;AF=0.500;AN=2;BaseQRankSum=-12.615;DP=500;Dels=0.00;EFF=NON_SYNONYMOUS_CODING(MODERATE|MISSENSE|tCt/tTt|S385F|687|SLCO5A1||CODING|NM_001146008.1|3|1),NON_SYNONYMOUS_CODING(MODERATE|MISSENSE|tCt/tTt|S385F|793|SLCO5A1||CODING|NM_001146009.1|3|1),NON_SYNONYMOUS_CODING(MODERATE|MISSENSE|tCt/tTt|S385F|848|SLCO5A1||CODING|NM_030958.2|4|1);FS=0.333;HaplotypeScore=4.8325;MLEAC=1;MLEAF=0.500;MQ=59.95…	chr8.70584567-70747299 ; 8q13.3 ; gain
SLFN12L	schlafen family member 12-like	0.805556	AC=1;AF=0.500;AN=2;BaseQRankSum=11.517;DB;DP=500;Dels=0.00;EFF=NON_SYNONYMOUS_CODING(MODERATE|MISSENSE|tAt/tGt|Y383C|588|SLFN12L||CODING|NM_001195790.1|3|1);FS=9.163;HaplotypeScore=5.9872;MLEAC=1;MLEAF=0.500;MQ=60.00;MQ0=0;MQRankSum=1.198;QD=13.38;ReadPosRankSum=-1.314	chr17.33801941-33814758 ; 17q12 ; loss
SLITRK5	SLIT and NTRK-like family, member 5	0.166667	AC=1;AF=0.500;AN=2;BaseQRankSum=-2.780;DP=500;Dels=0.00;EFF=NON_SYNONYMOUS_CODING(MODERATE|MISSENSE|Gag/Aag|E277K|958|SLITRK5||CODING|NM_015567.1|2|1);FS=10.339;HaplotypeScore=12.3914;MLEAC=1;MLEAF=0.500;MQ=60.00;MQ0=0;MQRankSum=-0.292;QD=13.49;ReadPosRankSum=-1.759	chr13.88324869-88331870 ; 13q31.2 ; gain
SMC3	structural maintenance of chromosomes 3	0.0555556	AC=1;AF=0.500;AN=2;BaseQRankSum=-14.522;DP=500;Dels=0.00;EFF=NON_SYNONYMOUS_CODING(MODERATE|MISSENSE|aaG/aaT|K1058N|1217|SMC3||CODING|NM_005445.3|26|1);FS=1.199;HaplotypeScore=12.9529;MLEAC=1;MLEAF=0.500;MQ=40.33;MQ0=26;MQRankSum=0.891;QD=19.28;ReadPosRankSum=-0.262	chr10.112327448-112364392 ; 10q25.2 ; gain
SMNDC1	survival motor neuron domain containing 1	0.138889	AC=1;AF=0.500;AN=2;BaseQRankSum=-6.960;DP=500;Dels=0.00;EFF=NON_SYNONYMOUS_CODING(MODERATE|MISSENSE|gGt/gTt|G110V|238|SMNDC1||CODING|NM_005871.3|4|1);FS=147.565;HaplotypeScore=5.4188;MLEAC=1;MLEAF=0.500;MQ=60.00;MQ0=0;MQRankSum=-0.598;QD=2.42;ReadPosRankSum=-0.623	chr10.112052797-112064707 ; 10q25.2 ; gain
SNTG1	syntrophin, gamma 1	0.0555556	AC=1;AF=0.500;AN=2;BaseQRankSum=-12.375;DP=500;Dels=0.00;EFF=NON_SYNONYMOUS_CODING(MODERATE|MISSENSE|aaC/aaA|N275K|517|SNTG1||CODING|NM_018967.2|13|1);FS=12.614;HaplotypeScore=7.8417;MLEAC=1;MLEAF=0.500;MQ=60.00;MQ0=0;MQRankSum=-0.726;QD=5.75;ReadPosRankSum=-0.338	chr8.50824596-51705427 ; 8q11.21 ; gain
SOCS2	suppressor of cytokine signaling 2	0.111111	AC=1;AF=0.500;AN=2;BaseQRankSum=-6.468;DP=500;Dels=0.00;EFF=NON_SYNONYMOUS_CODING(MODERATE|MISSENSE|aCc/aAc|T170N|198|SOCS2||CODING|NM_001270467.1|3|1),NON_SYNONYMOUS_CODING(MODERATE|MISSENSE|aCc/aAc|T170N|198|SOCS2||CODING|NM_001270468.1|3|1),NON_SYNONYMOUS_CODING(MODERATE|MISSENSE|aCc/aAc|T170N|198|SOCS2||CODING|NM_001270469.1|3|1),NON_SYNONYMOUS_CODING(MODERATE|MISSENSE|aCc/aAc|T170N|198|SOCS2…	chr12.93963597-93970521 ; 12q22 ; gain
SON	SON DNA binding protein	0.222222	NA	chr21.34915349-34949812 ; 21q22.11 ; gain
SORBS1	sorbin and SH3 domain containing 1	0.111111	AC=1;AF=0.500;AN=2;BaseQRankSum=1.563;DP=500;Dels=0.00;EFF=INTRON(MODIFIER||||684|SORBS1||CODING|NM_006434.2|11|1),INTRON(MODIFIER||||740|SORBS1||CODING|NM_001034957.1|11|1),INTRON(MODIFIER||||781|SORBS1||CODING|NM_024991.1|15|1),INTRON(MODIFIER||||816|SORBS1||CODING|NM_015385.2|15|1),NON_SYNONYMOUS_CODING(MODERATE|MISSENSE|gGg/gTg|G462V|905|SORBS1||CODING|NM_001034956.1|15|1),NON_SYNONYMOUS_CODI…	chr10.97071529-97321171 ; 10q24.1 ; gain
SORT1	sortilin 1	0.0555556	AC=1;AF=0.500;AN=2;BaseQRankSum=-10.198;DP=500;Dels=0.00;EFF=NON_SYNONYMOUS_CODING(MODERATE|MISSENSE|cAt/cGt|H354R|694|SORT1||CODING|NM_001205228.1|12|1),NON_SYNONYMOUS_CODING(MODERATE|MISSENSE|cAt/cGt|H491R|831|SORT1||CODING|NM_002959.5|12|1);FS=1.920;HaplotypeScore=2.4328;MLEAC=1;MLEAF=0.500;MQ=60.00;MQ0=0;MQRankSum=1.146;QD=12.25;ReadPosRankSum=1.506	chr1.109852187-109940563 ; 1p13.3 ; gain
SP100	SP100 nuclear antigen	0.0833333	AC=1;AF=0.500;AN=2;BaseQRankSum=-3.452;DP=500;Dels=0.00;EFF=NON_SYNONYMOUS_CODING(MODERATE|MISSENSE|aGa/aCa|R389T|445|SP100||CODING|NM_001206704.1|14|1),NON_SYNONYMOUS_CODING(MODERATE|MISSENSE|aGa/aCa|R399T|452|SP100||CODING|NM_001206703.1|12|1),NON_SYNONYMOUS_CODING(MODERATE|MISSENSE|aGa/aCa|R424T|480|SP100||CODING|NM_001206702.1|13|1),NON_SYNONYMOUS_CODING(MODERATE|MISSENSE|aGa/aCa|R424T|688|SP…	chr2.231280870-231410317 ; 2q37.1 ; gain
SPAG6	sperm associated antigen 6	0.0555556	AC=1;AF=0.500;AN=2;BaseQRankSum=10.773;DP=500;Dels=0.00;EFF=NON_SYNONYMOUS_CODING(MODERATE|MISSENSE|Tct/Cct|S247P|484|SPAG6||CODING|NM_001253854.1|9|1),NON_SYNONYMOUS_CODING(MODERATE|MISSENSE|Tct/Cct|S250P|484|SPAG6||CODING|NM_001253855.1|5|1),NON_SYNONYMOUS_CODING(MODERATE|MISSENSE|Tct/Cct|S272P|458|SPAG6||CODING|NM_172242.2|6|1),NON_SYNONYMOUS_CODING(MODERATE|MISSENSE|Tct/Cct|S272P|509|SPAG6||C…	chr10.22634373-22706539 ; 10p12.2 ; gain
SPATA6	spermatogenesis associated 6	0.5	AC=1;AF=0.500;AN=2;BaseQRankSum=-9.278;DB;DP=500;Dels=0.00;EFF=NON_SYNONYMOUS_CODING(MODERATE|MISSENSE|tGt/tAt|C478Y|488|SPATA6||CODING|NM_019073.2|13|1);FS=4.898;HaplotypeScore=9.8767;MLEAC=1;MLEAF=0.500;MQ=60.00;MQ0=0;MQRankSum=-1.429;QD=13.77;ReadPosRankSum=2.185	chr1.48761043-48937876 ; 1p33 ; gain
SPHKAP	SPHK1 interactor, AKAP domain containing	0.388889	AC=1;AF=0.500;AN=2;BaseQRankSum=9.452;DB;DP=500;Dels=0.00;EFF=NON_SYNONYMOUS_CODING(MODERATE|MISSENSE|caT/caG|H847Q|1671|SPHKAP||CODING|NM_030623.3|7|1),NON_SYNONYMOUS_CODING(MODERATE|MISSENSE|caT/caG|H847Q|1700|SPHKAP||CODING|NM_001142644.1|7|1);FS=1.183;HaplotypeScore=3.3584;MLEAC=1;MLEAF=0.500;MQ=59.98;MQ0=0;MQRankSum=-0.072;QD=14.67;ReadPosRankSum=0.132	chr2.228844669-229046361 ; 2q36.3 ; gain
SPICE1	NA	0.0833333	AC=1;AF=0.500;AN=2;BaseQRankSum=-6.245;DP=500;Dels=0.00;EFF=NON_SYNONYMOUS_CODING(MODERATE|MISSENSE|tGc/tTc|C629F|855|SPICE1||CODING|NM_144718.3|14|1);FS=0.000;HaplotypeScore=5.6751;MLEAC=1;MLEAF=0.500;MQ=60.00;MQ0=0;MQRankSum=0.108;QD=14.47;ReadPosRankSum=1.771	chr3.113161564-113234034 ; 3q13.2 ; gain
SPTA1	spectrin, alpha, erythrocytic 1 (elliptocytosis 2)	0.194444	AC=1;AF=0.500;AN=2;BaseQRankSum=-3.296;DP=500;Dels=0.00;EFF=DOWNSTREAM(MODIFIER||||2419|SPTA1||CODING|NM_003126.2||1),NON_SYNONYMOUS_CODING(MODERATE|MISSENSE|Cac/Aac|H131N|313|OR10Z1||CODING|NM_001004478.1|1|1);FS=4.981;HaplotypeScore=16.7314;MLEAC=1;MLEAF=0.500;MQ=60.00;MQ0=0;MQRankSum=-0.353;QD=18.96;ReadPosRankSum=2.017	chr1.158580495-158656506 ; 1q23.1 ; gain
SRSF7	NA	0.138889	NA	chr2.38970740-38978636 ; 2p22.1 ; loss
SSTR3	somatostatin receptor 3	0.0555556	AC=1;AF=0.500;AN=2;BaseQRankSum=-10.277;DP=500;Dels=0.00;EFF=NON_SYNONYMOUS_CODING(MODERATE|MISSENSE|gCc/gTc|A18V|418|SSTR3||CODING|NM_001051.2|2|1);FS=0.713;HaplotypeScore=6.5082;MLEAC=1;MLEAF=0.500;MQ=60.00;MQ0=0;MQRankSum=1.216;QD=17.15;ReadPosRankSum=1.468	chr22.37602244-37608353 ; 22q13.1 ; gain
ST3GAL4	ST3 beta-galactoside alpha-2,3-sialyltransferase 4	0.0555556	AC=2;AF=1.00;AN=2;BaseQRankSum=-0.694;DP=500;Dels=0.00;EFF=NON_SYNONYMOUS_CODING(MODERATE|MISSENSE|aAg/aCg|K252T|329|ST3GAL4||CODING|NM_006278.2|9|1),NON_SYNONYMOUS_CODING(MODERATE|MISSENSE|aAg/aCg|K255T|332|ST3GAL4||CODING|NM_001254759.1|7|1),NON_SYNONYMOUS_CODING(MODERATE|MISSENSE|aAg/aCg|K256T|333|ST3GAL4||CODING|NM_001254757.1|9|1),NON_SYNONYMOUS_CODING(MODERATE|MISSENSE|aAg/aCg|K256T|333|ST3…	chr11.126225539-126284536 ; 11q24.2 ; gain
ST7L	suppression of tumorigenicity 7 like	0.444444	AC=1;AF=0.500;AN=2;BaseQRankSum=7.189;DB;DP=500;Dels=0.00;EFF=NON_SYNONYMOUS_CODING(MODERATE|MISSENSE|cGa/cAa|R434Q|558|ST7L||CODING|NM_138727.3|12|1),NON_SYNONYMOUS_CODING(MODERATE|MISSENSE|cGa/cAa|R451Q|544|ST7L||CODING|NM_138728.2|12|1),NON_SYNONYMOUS_CODING(MODERATE|MISSENSE|cGa/cAa|R451Q|555|ST7L||CODING|NM_138729.3|12|1),NON_SYNONYMOUS_CODING(MODERATE|MISSENSE|cGa/cAa|R451Q|575|ST7L||CODING…	chr1.113066140-113162040 ; 1p13.2 ; gain
ST8SIA6	ST8 alpha-N-acetyl-neuraminide alpha-2,8-sialyltransferase 6	0.0555556	AC=1;AF=0.500;AN=2;BaseQRankSum=-4.602;DP=500;Dels=0.00;EFF=NON_SYNONYMOUS_CODING(MODERATE|MISSENSE|aAa/aTa|K314I|398|ST8SIA6||CODING|NM_001004470.1|8|1);FS=14.756;HaplotypeScore=7.2946;MLEAC=1;MLEAF=0.500;MQ=59.95;MQ0=0;MQRankSum=-0.668;QD=13.62;ReadPosRankSum=2.212	chr10.17362675-17496254 ; 10p12.33 ; gain
STAB2	stabilin 2	0.111111	AC=1;AF=0.500;AN=2;BaseQRankSum=-3.341;DP=500;Dels=0.00;EFF=NON_SYNONYMOUS_CODING(MODERATE|MISSENSE|cCa/cGa|P2413R|2551|STAB2||CODING|NM_017564.9|65|1);FS=1.241;HaplotypeScore=7.1053;MLEAC=1;MLEAF=0.500;MQ=60.00;MQ0=0;MQRankSum=-0.178;QD=3.54;ReadPosRankSum=-2.548	chr12.103981068-104160502 ; 12q23.3 ; gain
STAG1	stromal antigen 1	0.0555556	AC=1;AF=0.500;AN=2;BaseQRankSum=-1.729;DP=500;Dels=0.00;EFF=NON_SYNONYMOUS_CODING(MODERATE|MISSENSE|Cat/Tat|H948Y|1258|STAG1||CODING|NM_005862.2|27|1);FS=6.180;HaplotypeScore=6.4836;MLEAC=1;MLEAF=0.500;MQ=60.00;MQ0=0;MQRankSum=-0.464;QD=14.42;ReadPosRankSum=0.390	chr3.136055998-136471245 ; 3q22.3 ; gain
STARD3	StAR-related lipid transfer (START) domain containing 3	0.777778	AC=1;AF=0.500;AN=2;BaseQRankSum=-11.262;DB;DP=500;Dels=0.00;EFF=NON_SYNONYMOUS_CODING(MODERATE|MISSENSE|gGg/gCg|G198A|427|STARD3||CODING|NM_001165938.1|7|1),NON_SYNONYMOUS_CODING(MODERATE|MISSENSE|gGg/gCg|G216A|445|STARD3||CODING|NM_001165937.1|8|1),NON_SYNONYMOUS_CODING(MODERATE|MISSENSE|gGg/gCg|G216A|445|STARD3||CODING|NM_006804.3|8|1);FS=20.495;HaplotypeScore=8.1913;MLEAC=1;MLEAF=0.500;MQ=60.0…	chr17.37793332-37820454 ; 17q12 ; gain
STOML1	stomatin (EPB72)-like 1	0.0555556	AC=1;AF=0.500;AN=2;BaseQRankSum=-7.857;DP=500;Dels=0.00;EFF=NON_SYNONYMOUS_CODING(MODERATE|MISSENSE|Gtg/Atg|V264M|310|STOML1||CODING|NM_001256676.1|7|1),NON_SYNONYMOUS_CODING(MODERATE|MISSENSE|Gtg/Atg|V281M|327|STOML1||CODING|NM_001256675.1|6|1),NON_SYNONYMOUS_CODING(MODERATE|MISSENSE|Gtg/Atg|V301M|347|STOML1||CODING|NM_001256674.1|6|1),NON_SYNONYMOUS_CODING(MODERATE|MISSENSE|Gtg/Atg|V302M|348|ST…	chr15.74275558-74286963 ; 15q24.1 ; gain
STRA6	stimulated by retinoic acid gene 6 homolog (mouse)	0.0555556	AC=1;AF=0.500;AN=2;BaseQRankSum=4.301;DP=500;Dels=0.00;EFF=NON_SYNONYMOUS_CODING(MODERATE|MISSENSE|Acg/Tcg|T157S|658|STRA6||CODING|NM_001142619.1|7|1),NON_SYNONYMOUS_CODING(MODERATE|MISSENSE|Acg/Tcg|T166S|667|STRA6||CODING|NM_001142617.1|7|1),NON_SYNONYMOUS_CODING(MODERATE|MISSENSE|Acg/Tcg|T166S|667|STRA6||CODING|NM_001142618.1|7|1),NON_SYNONYMOUS_CODING(MODERATE|MISSENSE|Acg/Tcg|T166S|667|STRA6|…	chr15.74471807-74502046 ; 15q24.1 ; gain
STT3B	STT3, subunit of the oligosaccharyltransferase complex, homolog B (S. cerevisiae)	0.0555556	AC=1;AF=0.500;AN=2;BaseQRankSum=5.992;DP=500;Dels=0.00;EFF=NON_SYNONYMOUS_CODING(MODERATE|MISSENSE|Tac/Cac|Y562H|826|STT3B||CODING|NM_178862.1|11|1);FS=0.327;HaplotypeScore=2.8304;MLEAC=1;MLEAF=0.500;MQ=59.95;MQ0=0;MQRankSum=-1.175;QD=13.83;ReadPosRankSum=-2.203	chr3.31574490-31677556 ; 3p23 ; gain
SULT2A1	sulfotransferase family, cytosolic, 2A, dehydroepiandrosterone (DHEA)-preferring, member 1	0.0555556	AC=1;AF=0.500;AN=2;BaseQRankSum=-0.207;DP=500;Dels=0.00;EFF=NON_SYNONYMOUS_CODING(MODERATE|MISSENSE|tGg/tTg|W77L|285|SULT2A1||CODING|NM_003167.3|2|1);FS=18.285;HaplotypeScore=5.9267;MLEAC=1;MLEAF=0.500;MQ=60.00;MQ0=0;MQRankSum=-0.701;QD=14.21;ReadPosRankSum=0.344	chr19.48373722-48389654 ; 19q13.33 ; gain
SUPV3L1	suppressor of var1, 3-like 1 (S. cerevisiae)	0.0555556	AC=1;AF=0.500;AN=2;BaseQRankSum=-8.121;DB;DP=498;Dels=0.00;EFF=NON_SYNONYMOUS_CODING(MODERATE|MISSENSE|cCa/cTa|P692L|786|SUPV3L1||CODING|NM_003171.3|15|1);FS=4.044;HaplotypeScore=4.7318;MLEAC=1;MLEAF=0.500;MQ=60.00;MQ0=0;MQRankSum=0.310;QD=12.78;ReadPosRankSum=-0.044	chr10.70939992-70968849 ; 10q22.1 ; gain
SV2B	synaptic vesicle glycoprotein 2B; hypothetical protein LOC100128403	0.0833333	AC=1;AF=0.500;AN=2;BaseQRankSum=-12.710;DP=500;Dels=0.00;EFF=NON_SYNONYMOUS_CODING(MODERATE|MISSENSE|aGc/aAc|S149N|532|SV2B||CODING|NM_001167580.1|4|1),NON_SYNONYMOUS_CODING(MODERATE|MISSENSE|aGc/aAc|S300N|683|SV2B||CODING|NM_014848.4|6|1);FS=7.701;HaplotypeScore=5.9475;MLEAC=1;MLEAF=0.500;MQ=60.00;MQ0=0;MQRankSum=1.096;QD=13.56;ReadPosRankSum=-1.452	chr15.91643181-91844539 ; 15q26.1 ; gain
SVEP1	sushi, von Willebrand factor type A, EGF and pentraxin domain containing 1	0.0555556	AC=1;AF=0.500;AN=2;BaseQRankSum=-2.003;DP=500;Dels=0.00;EFF=NON_SYNONYMOUS_CODING(MODERATE|MISSENSE|Gct/Act|A3470T|3571|SVEP1||CODING|NM_153366.3|44|1);FS=2.627;HaplotypeScore=1.9559;MLEAC=1;MLEAF=0.500;MQ=60.00;MQ0=0;MQRankSum=0.066;QD=18.75;ReadPosRankSum=0.825	chr9.113127528-113342160 ; 9q31.3 ; gain
SVIL	supervillin	0.444444	AC=1;AF=0.500;AN=2;BaseQRankSum=-12.421;DP=500;Dels=0.00;EFF=NON_SYNONYMOUS_CODING(MODERATE|MISSENSE|Ttg/Gtg|L1029V|2214|SVIL||CODING|NM_021738.2|15|1),NON_SYNONYMOUS_CODING(MODERATE|MISSENSE|Ttg/Gtg|L603V|1788|SVIL||CODING|NM_003174.3|13|1);FS=12.250;HaplotypeScore=7.6753;MLEAC=1;MLEAF=0.500;MQ=59.90;MQ0=0;MQRankSum=-0.724;QD=11.47;ReadPosRankSum=1.424	chr10.29746276-30024730 ; 10p11.23 ; gain
SVOP	SV2 related protein homolog (rat)	0.111111	AC=1;AF=0.500;AN=2;BaseQRankSum=7.090;DP=500;Dels=0.00;EFF=NON_SYNONYMOUS_CODING(MODERATE|MISSENSE|cCg/cTg|P423L|495|SVOP||CODING|NM_018711.2|14|1);FS=1.548;HaplotypeScore=4.6422;MLEAC=1;MLEAF=0.500;MQ=60.00;MQ0=0;MQRankSum=-0.021;QD=16.82;ReadPosRankSum=-1.495	chr12.109304657-109458845 ; 12q24.11 ; gain
SYT4	synaptotagmin IV	0.138889	AC=1;AF=0.500;AN=2;BaseQRankSum=-0.993;DP=499;Dels=0.00;EFF=NON_SYNONYMOUS_CODING(MODERATE|MISSENSE|cCc/cTc|P106L|425|SYT4||CODING|NM_020783.3|2|1);FS=6.597;HaplotypeScore=9.7196;MLEAC=1;MLEAF=0.500;MQ=60.00;MQ0=0;MQRankSum=-1.381;QD=14.31;ReadPosRankSum=-1.129	chr18.40847856-40857615 ; 18q12.3 ; gain
SYT7	synaptotagmin XVII; synaptotagmin VII	0.0555556	AC=1;AF=0.500;AN=2;BaseQRankSum=-5.465;DP=500;Dels=0.00;EFF=NON_SYNONYMOUS_CODING(MODERATE|MISSENSE|Ggc/Tgc|G137C|403|SYT7||CODING|NM_004200.3|5|1),NON_SYNONYMOUS_CODING(MODERATE|MISSENSE|Ggc/Tgc|G212C|478|SYT7||CODING|NM_001252065.1|6|1);FS=0.000;HaplotypeScore=7.8458;MLEAC=1;MLEAF=0.500;MQ=60.00;MQ0=0;MQRankSum=2.373;QD=14.59;ReadPosRankSum=0.204	chr11.61281187-61348344 ; 11q12.2 ; gain
TAOK2	TAO kinase 2	0.0555556	AC=1;AF=0.500;AN=2;BaseQRankSum=-0.949;DP=500;Dels=0.00;EFF=DOWNSTREAM(MODIFIER||||1049|TAOK2||CODING|NM_004783.3||1),INTRON(MODIFIER||||175|HIRIP3||CODING|NM_001197323.1|3|1),NON_SYNONYMOUS_CODING(MODERATE|MISSENSE|Cca/Aca|P109T|556|HIRIP3||CODING|NM_003609.4|4|1),UPSTREAM(MODIFIER||||244|INO80E||CODING|NM_173618.1||1);FS=0.328;HaplotypeScore=12.6515;MLEAC=1;MLEAF=0.500;MQ=59.99;MQ0=0;MQRankSum=…	chr16.29985187-30003582 ; 16p11.2 ; gain
TAS2R31	taste receptor, type 2, member 31	0.166667	AC=1;AF=0.500;AN=2;BaseQRankSum=-6.581;DB;DP=500;Dels=0.00;EFF=INTRON(MODIFIER|||||PRH1-PRR4||NON_CODING|NR_037918.1|3|1),NON_SYNONYMOUS_CODING(MODERATE|MISSENSE|Gtg/Atg|V297M|309|TAS2R31||CODING|NM_176885.2|1|1);FS=147.232;HaplotypeScore=3.3383;MLEAC=1;MLEAF=0.500;MQ=51.74;MQ0=8;MQRankSum=-16.903;QD=3.90;ReadPosRankSum=1.629	chr12.11182985-11184006 ; 12p13.2 ; gain
TATDN1	TatD DNase domain containing 1	0.0833333	AC=1;AF=0.500;AN=2;BaseQRankSum=-0.744;DP=500;Dels=0.00;EFF=DOWNSTREAM(MODIFIER||||250|TATDN1||CODING|NM_001146160.1||1),DOWNSTREAM(MODIFIER||||297|TATDN1||CODING|NM_032026.3||1),DOWNSTREAM(MODIFIER|||||TATDN1||CODING|NR_027427.1||1),NON_SYNONYMOUS_CODING(MODERATE|MISSENSE|Gat/Cat|D594H|664|RNF139||CODING|NM_007218.3|2|1);FS=1.553;HaplotypeScore=3.9945;MLEAC=1;MLEAF=0.500;MQ=59.97;MQ0=0;MQRankSum…	chr8.125500734-125551329 ; 8q24.13 ; gain
TBCEL	tubulin folding cofactor E-like	0.111111	AC=1;AF=0.500;AN=2;BaseQRankSum=-3.709;DP=499;Dels=0.00;EFF=NON_SYNONYMOUS_CODING(MODERATE|MISSENSE|Gat/Aat|D2N|424|TBCEL||CODING|NM_001130047.1|2|1),NON_SYNONYMOUS_CODING(MODERATE|MISSENSE|Gat/Aat|D2N|424|TBCEL||CODING|NM_152715.3|2|1);FS=2.787;HaplotypeScore=4.6533;MLEAC=1;MLEAF=0.500;MQ=59.94;MQ0=0;MQRankSum=0.103;QD=13.75;ReadPosRankSum=0.634	chr11.120894802-120960354 ; 11q23.3 ; gain
TCF7L2	transcription factor 7-like 2 (T-cell specific, HMG-box)	0.166667	NA	chr10.114710008-114927436 ; 10q25.2 ; gain
TEAD3	TEA domain family member 3	0.0555556	AC=1;AF=0.500;AN=2;BaseQRankSum=3.421;DP=500;Dels=0.00;EFF=NON_SYNONYMOUS_CODING(MODERATE|MISSENSE|agT/agA|S138R|435|TEAD3||CODING|NM_003214.3|6|1);FS=0.000;HaplotypeScore=5.6437;MLEAC=1;MLEAF=0.500;MQ=59.99;MQ0=0;MQRankSum=0.109;QD=12.77;ReadPosRankSum=-0.555	chr6.35441373-35464861 ; 6p21.31 ; gain
TECRL	steroid 5 alpha-reductase 2-like 2	0.0833333	AC=1;AF=0.500;AN=2;BaseQRankSum=-0.025;DP=500;Dels=0.00;EFF=NON_SYNONYMOUS_CODING(MODERATE|MISSENSE|Gac/Cac|D136H|363|TECRL||CODING|NM_001010874.4|4|1);FS=0.670;HaplotypeScore=4.6842;MLEAC=1;MLEAF=0.500;MQ=59.94;MQ0=0;MQRankSum=-1.420;QD=13.37;ReadPosRankSum=-0.210	chr4.65144176-65275178 ; 4q13.1 ; gain
TECTA	tectorin alpha	0.138889	AC=1;AF=0.500;AN=2;BaseQRankSum=-2.677;DP=500;Dels=0.00;EFF=NON_SYNONYMOUS_CODING(MODERATE|MISSENSE|cCc/cTc|P1305L|2155|TECTA||CODING|NM_005422.2|11|1);FS=2.332;HaplotypeScore=13.4494;MLEAC=1;MLEAF=0.500;MQ=60.00;MQ0=0;MQRankSum=-1.416;QD=13.48;ReadPosRankSum=-0.932	chr11.120973374-121061515 ; 11q23.3 ; gain
TET2	tet oncogene family member 2	0.333333	AC=1;AF=0.500;AN=2;BaseQRankSum=-6.089;DB;DP=500;Dels=0.00;EFF=NON_SYNONYMOUS_CODING(MODERATE|MISSENSE|Ata/Gta|I1762V|2002|TET2||CODING|NM_001127208.2|11|1);FS=0.000;HaplotypeScore=8.4352;MLEAC=1;MLEAF=0.500;MQ=59.95;MQ0=0;MQRankSum=-0.227;QD=20.02;ReadPosRankSum=-0.451	chr4.106067031-106200960 ; 4q24 ; loss
TGFBR2	transforming growth factor, beta receptor II (70/80kDa)	0.0833333	NA	chr3.30647993-30735633 ; 3p24.1 ; gain
TIGD7	tigger transposable element derived 7	0.0833333	AC=1;AF=0.500;AN=2;BaseQRankSum=-7.770;DP=500;Dels=0.00;EFF=NON_SYNONYMOUS_CODING(MODERATE|MISSENSE|Gtc/Ttc|V274F|549|TIGD7||CODING|NM_033208.3|2|1);FS=0.000;HaplotypeScore=12.1375;MLEAC=1;MLEAF=0.500;MQ=60.00;MQ0=0;MQRankSum=-0.216;QD=15.90;ReadPosRankSum=0.361	chr16.3348807-3355439 ; 16p13.3 ; gain
TLR4	toll-like receptor 4	0.138889	AC=2;AF=1.00;AN=2;DP=499;Dels=0.00;EFF=NON_SYNONYMOUS_CODING(MODERATE|MISSENSE|cCa/cAa|P180Q|799|TLR4||CODING|NM_003266.3|4|1),NON_SYNONYMOUS_CODING(MODERATE|MISSENSE|cCa/cAa|P20Q|639|TLR4||CODING|NM_138557.2|2|1),NON_SYNONYMOUS_CODING(MODERATE|MISSENSE|cCa/cAa|P220Q|839|TLR4||CODING|NM_138554.4|3|1);FS=0.000;HaplotypeScore=7.6094;MLEAC=2;MLEAF=1.00;MQ=60.00;MQ0=0;QD=34.04	chr9.120466452-120479769 ; 9q33.1 ; gain
TM4SF19	transmembrane 4 L six family member 19	0.777778	AC=1;AF=0.500;AN=2;BaseQRankSum=-6.732;DB;DP=500;Dels=0.00;EFF=EXON(MODIFIER|||||TM4SF19-TCTEX1D2||NON_CODING|NR_037950.1|2|1),NON_SYNONYMOUS_CODING(MODERATE|MISSENSE|cAg/cCg|Q8P|183|TM4SF19||CODING|NM_001204898.1|2|1),NON_SYNONYMOUS_CODING(MODERATE|MISSENSE|cAg/cCg|Q8P|209|TM4SF19||CODING|NM_138461.3|2|1),NON_SYNONYMOUS_CODING(MODERATE|MISSENSE|cAg/cCg|Q8P|242|TM4SF19||CODING|NM_001204897.1|2|1)…	chr3.196050416-196065291 ; 3q29 ; gain
TMC1	transmembrane channel-like 1	0.0833333	AC=1;AF=0.500;AN=2;BaseQRankSum=8.595;DP=500;Dels=0.00;EFF=NON_SYNONYMOUS_CODING(MODERATE|MISSENSE|cGg/cTg|R44L|760|TMC1||CODING|NM_138691.2|7|1);FS=7.700;HaplotypeScore=8.4853;MLEAC=1;MLEAF=0.500;MQ=59.97;MQ0=0;MQRankSum=-0.999;QD=14.15;ReadPosRankSum=3.044	chr9.75136716-75451267 ; 9q21.13 ; gain
TMED2	transmembrane emp24 domain trafficking protein 2	0.111111	AC=1;AF=0.500;AN=2;BaseQRankSum=-0.378;DP=500;Dels=0.00;EFF=NON_SYNONYMOUS_CODING(MODERATE|MISSENSE|Gaa/Caa|E30Q|201|TMED2||CODING|NM_006815.3|1|1);FS=1.263;HaplotypeScore=7.1060;MLEAC=1;MLEAF=0.500;MQ=60.00;MQ0=0;MQRankSum=-0.336;QD=3.21;ReadPosRankSum=-0.258	chr12.124069075-124082688 ; 12q24.31 ; gain
TMEM132B	transmembrane protein 132B; hypothetical LOC121296	0.111111	AC=1;AF=0.500;AN=2;BaseQRankSum=2.837;DB;DP=500;Dels=0.00;EFF=NON_SYNONYMOUS_CODING(MODERATE|MISSENSE|Gat/Aat|D469N|1078|TMEM132B||CODING|NM_052907.2|5|1);FS=7.543;HaplotypeScore=3.9419;MLEAC=1;MLEAF=0.500;MQ=59.37;MQ0=1;MQRankSum=2.483;QD=13.92;ReadPosRankSum=0.623	chr12.125811161-126143589 ; 12q24.31 ; gain
TMEM136	transmembrane protein 136	0.111111	AC=2;AF=1.00;AN=2;BaseQRankSum=-4.794;DP=500;Dels=0.00;EFF=INTRON(MODIFIER||||126|TMEM136||CODING|NM_001198674.1|3|1),INTRON(MODIFIER||||148|TMEM136||CODING|NM_174926.2|3|1),NON_SYNONYMOUS_CODING(MODERATE|MISSENSE|Gta/Tta|V159L|245|TMEM136||CODING|NM_001198671.1|3|1),NON_SYNONYMOUS_CODING(MODERATE|MISSENSE|Gta/Tta|V181L|267|TMEM136||CODING|NM_001198670.1|3|1),NON_SYNONYMOUS_CODING(MODERATE|MISSEN…	chr11.120195837-120204388 ; 11q23.3 ; gain
TMEM147	transmembrane protein 147	0.111111	AC=1;AF=0.500;AN=2;BaseQRankSum=-8.841;DP=500;Dels=0.00;EFF=DOWNSTREAM(MODIFIER||||150|TMEM147||CODING|NM_001242598.1||1),DOWNSTREAM(MODIFIER||||175|TMEM147||CODING|NM_001242597.1||1),DOWNSTREAM(MODIFIER||||224|TMEM147||CODING|NM_032635.3||1),NON_SYNONYMOUS_CODING(MODERATE|MISSENSE|gGa/gAa|G1020E|1035|ATP4A||CODING|NM_000704.2|21|1),UPSTREAM(MODIFIER|||||LOC100506469||NON_CODING|NR_038396.1||1);F…	chr19.36036501-36038429 ; 19q13.12 ; gain
TMEM200A	transmembrane protein 200A	0.0833333	AC=1;AF=0.500;AN=2;BaseQRankSum=-8.121;DP=500;Dels=0.00;EFF=NON_SYNONYMOUS_CODING(MODERATE|MISSENSE|Gct/Tct|A143S|491|TMEM200A||CODING|NM_001258276.1|2|1),NON_SYNONYMOUS_CODING(MODERATE|MISSENSE|Gct/Tct|A143S|491|TMEM200A||CODING|NM_001258277.1|3|1),NON_SYNONYMOUS_CODING(MODERATE|MISSENSE|Gct/Tct|A143S|491|TMEM200A||CODING|NM_001258278.1|2|1),NON_SYNONYMOUS_CODING(MODERATE|MISSENSE|Gct/Tct|A143S|…	chr6.130687425-130764210 ; 6q23.1 ; loss
TMPRSS13	transmembrane protease, serine 13	0.111111	AC=1;AF=0.500;AN=2;BaseQRankSum=8.598;DP=500;Dels=0.00;EFF=NON_SYNONYMOUS_CODING(MODERATE|MISSENSE|Gcc/Ccc|A381P|532|TMPRSS13||CODING|NM_001206789.1|8|1),NON_SYNONYMOUS_CODING(MODERATE|MISSENSE|Gcc/Ccc|A416P|491|TMPRSS13||CODING|NM_001206790.1|9|1),NON_SYNONYMOUS_CODING(MODERATE|MISSENSE|Gcc/Ccc|A416P|563|TMPRSS13||CODING|NM_001244995.1|9|1),NON_SYNONYMOUS_CODING(MODERATE|MISSENSE|Gcc/Ccc|A416P|5…	chr11.117771355-117800168 ; 11q23.3 ; gain
TMPRSS15	NA	0.0833333	NA	chr21.19641432-19775970 ; 21q21.1 ; gain
TMTC1	transmembrane and tetratricopeptide repeat containing 1	0.0555556	AC=1;AF=0.500;AN=2;BaseQRankSum=-5.077;DP=500;Dels=0.00;EFF=NON_SYNONYMOUS_CODING(MODERATE|MISSENSE|Gcc/Tcc|A179S|882|TMTC1||CODING|NM_001193451.1|3|1),NON_SYNONYMOUS_CODING(MODERATE|MISSENSE|Gcc/Tcc|A71S|774|TMTC1||CODING|NM_175861.3|3|1);FS=0.723;HaplotypeScore=7.1697;MLEAC=1;MLEAF=0.500;MQ=60.00;MQ0=0;MQRankSum=-0.292;QD=12.79;ReadPosRankSum=3.411	chr12.29653745-29937692 ; 12p11.22 ; gain
TMUB2	transmembrane and ubiquitin-like domain containing 2	0.0555556	AC=1;AF=0.500;AN=2;BaseQRankSum=8.304;DP=499;Dels=0.00;EFF=DOWNSTREAM(MODIFIER||||301|TMUB2||CODING|NM_024107.2||1),DOWNSTREAM(MODIFIER||||301|TMUB2||CODING|NM_177441.2||1),DOWNSTREAM(MODIFIER||||321|TMUB2||CODING|NM_001076674.1||1),NON_SYNONYMOUS_CODING(MODERATE|MISSENSE|cCg/cTg|P335L|347|ATXN7L3||CODING|NM_001098833.1|12|1),NON_SYNONYMOUS_CODING(MODERATE|MISSENSE|cCg/cTg|P342L|354|ATXN7L3||CODI…	chr17.42264353-42269099 ; 17q21.31 ; gain
TNC	tenascin C	0.0833333	NA	chr9.117781853-117880536 ; 9q33.1 ; gain
TNR	tenascin R (restrictin, janusin)	0.0555556	NA	chr1.175291934-175712752 ; 1q25.1 ; gain
TP53	tumor protein p53	0.861111	AC=1;AF=0.500;AN=2;BaseQRankSum=-7.916;DP=500;Dels=0.00;EFF=NON_SYNONYMOUS_CODING(MODERATE|MISSENSE|Cat/Tat|H140Y|354|TP53||CODING|NM_001126118.1|4|1),NON_SYNONYMOUS_CODING(MODERATE|MISSENSE|Cat/Tat|H179Y|341|TP53||CODING|NM_001126114.2|5|1),NON_SYNONYMOUS_CODING(MODERATE|MISSENSE|Cat/Tat|H179Y|346|TP53||CODING|NM_001126113.2|5|1),NON_SYNONYMOUS_CODING(MODERATE|MISSENSE|Cat/Tat|H179Y|393|TP53||CO…	chr17.7571719-7590868 ; 17p13.1 ; gain
TPMT	thiopurine S-methyltransferase	0.138889	AC=1;AF=0.500;AN=2;BaseQRankSum=9.545;DP=500;Dels=0.00;EFF=NON_SYNONYMOUS_CODING(MODERATE|MISSENSE|gTt/gCt|V74A|245|TPMT||CODING|NM_000367.2|3|1);FS=1.061;HaplotypeScore=8.6433;MLEAC=1;MLEAF=0.500;MQ=59.85;MQ0=0;MQRankSum=0.224;QD=14.45;ReadPosRankSum=-1.192	chr6.18128544-18155374 ; 6p22.3 ; gain
TPR	translocated promoter region (to activated MET oncogene)	0.25	AC=1;AF=0.500;AN=2;BaseQRankSum=-4.101;DB;DP=500;Dels=0.00;EFF=INTRON(MODIFIER|||||MIR548F1||NON_CODING|NR_031642.1|1|1),NON_SYNONYMOUS_CODING(MODERATE|MISSENSE|Gta/Ata|V779I|2363|TPR||CODING|NM_003292.2|19|1);FS=2.879;HaplotypeScore=1.8675;MLEAC=1;MLEAF=0.500;MQ=60.00;MQ0=0;MQRankSum=0.479;QD=11.32;ReadPosRankSum=0.709	chr1.186280785-186344457 ; 1q31.1 ; gain
TPTE	transmembrane phosphatase with tensin homology	0.0555556	AC=1;AF=0.500;AN=2;BaseQRankSum=-3.987;DB;DP=500;Dels=0.00;EFF=NON_SYNONYMOUS_CODING(MODERATE|MISSENSE|Gga/Aga|G346R|513|TPTE||CODING|NM_199260.2|17|1),NON_SYNONYMOUS_CODING(MODERATE|MISSENSE|Gga/Aga|G366R|533|TPTE||CODING|NM_199259.2|18|1),NON_SYNONYMOUS_CODING(MODERATE|MISSENSE|Gga/Aga|G384R|551|TPTE||CODING|NM_199261.2|19|1);FS=0.419;HaplotypeScore=5.0672;MLEAC=1;MLEAF=0.500;MQ=58.65;MQ0=0;MQR…	chr21.10906742-10990920 ; 21p11.1 ; loss
TRAK1	trafficking protein, kinesin binding 1	0.138889	AC=1;AF=0.500;AN=2;BaseQRankSum=-10.283;DP=500;Dels=0.00;EFF=NON_SYNONYMOUS_CODING(MODERATE|MISSENSE|tCc/tTc|S796F|953|TRAK1||CODING|NM_001042646.2|16|1);FS=1.568;HaplotypeScore=41.3697;MLEAC=1;MLEAF=0.500;MQ=59.90;MQ0=1;MQRankSum=-0.579;QD=11.50;ReadPosRankSum=0.093	chr3.42132745-42267382 ; 3p22.1 ; gain
TRAK2	trafficking protein, kinesin binding 2	0.0833333	AC=1;AF=0.500;AN=2;BaseQRankSum=-8.960;DP=500;Dels=0.00;EFF=NON_SYNONYMOUS_CODING(MODERATE|MISSENSE|aGa/aCa|R265T|914|TRAK2||CODING|NM_015049.2|8|1);FS=0.428;HaplotypeScore=4.4859;MLEAC=1;MLEAF=0.500;MQ=59.86;MQ0=0;MQRankSum=-0.133;QD=21.39;ReadPosRankSum=0.456	chr2.202241929-202316319 ; 2q33.1 ; gain
TRERF1	transcriptional regulating factor 1	0.0555556	AC=1;AF=0.500;AN=2;BaseQRankSum=7.526;DP=500;Dels=0.00;EFF=NON_SYNONYMOUS_CODING(MODERATE|MISSENSE|gCg/gAg|A1122E|1200|TRERF1||CODING|NM_033502.2|18|1);FS=1.062;HaplotypeScore=2.6147;MLEAC=1;MLEAF=0.500;MQ=60.00;MQ0=0;MQRankSum=0.455;QD=15.17;ReadPosRankSum=0.175	chr6.42192668-42419783 ; 6p21.1 ; gain
TRIM33	tripartite motif-containing 33	0.138889	NA	chr1.114935398-115053781 ; 1p13.2 ; gain
TRIM48	tripartite motif-containing 53; similar to Tripartite motif protein 49 (RING finger protein 18) (Testis-specific ring-finger protein); similar to ring finger protein 18; similar to hCG1988749; tripartite motif-containing 49; tripartite motif-containing 48; hypothetical protein LOC100131392	0.194444	AC=1;AF=0.500;AN=2;BaseQRankSum=-6.216;DP=500;Dels=0.00;EFF=NON_SYNONYMOUS_CODING(MODERATE|MISSENSE|aCc/aTc|T9I|224|TRIM48||CODING|NM_024114.3|1|1);FS=7.925;HaplotypeScore=2.9941;MLEAC=1;MLEAF=0.500;MQ=43.70;MQ0=1;MQRankSum=9.149;QD=11.91;ReadPosRankSum=1.386	chr11.55029657-55038595 ; 11q11 ; loss
TRIM58	tripartite motif-containing 58	0.361111	AC=2;AF=1.00;AN=2;DB;DP=499;Dels=0.00;EFF=NON_SYNONYMOUS_CODING(MODERATE|MISSENSE|aCg/aTg|T374M|486|TRIM58||CODING|NM_015431.3|6|1);FS=0.000;HaplotypeScore=3.2205;MLEAC=2;MLEAF=1.00;MQ=60.00;MQ0=0;QD=34.99	chr1.248020500-248043438 ; 1q44 ; loss
TRPC1	transient receptor potential cation channel, subfamily C, member 1	0.0833333	AC=1;AF=0.500;AN=2;BaseQRankSum=-2.126;DP=500;Dels=0.00;EFF=NON_SYNONYMOUS_CODING(MODERATE|MISSENSE|cGa/cTa|R309L|759|TRPC1||CODING|NM_003304.4|6|1),NON_SYNONYMOUS_CODING(MODERATE|MISSENSE|cGa/cTa|R343L|793|TRPC1||CODING|NM_001251845.1|7|1);FS=2.245;HaplotypeScore=2.5440;MLEAC=1;MLEAF=0.500;MQ=59.99;MQ0=0;MQRankSum=-1.130;QD=21.51;ReadPosRankSum=-1.978	chr3.142443265-142526729 ; 3q23 ; gain
TRPS1	trichorhinophalangeal syndrome I	0.0833333	AC=1;AF=0.500;AN=2;BaseQRankSum=-8.864;DP=500;Dels=0.00;EFF=NON_SYNONYMOUS_CODING(MODERATE|MISSENSE|Cag/Aag|Q881K|1294|TRPS1||CODING|NM_014112.2|5|1);FS=0.799;HaplotypeScore=24.2590;MLEAC=1;MLEAF=0.500;MQ=60.00;MQ0=0;MQRankSum=-0.145;QD=14.10;ReadPosRankSum=0.197	chr8.116420723-116681228 ; 8q23.3 ; gain
TRPV4	transient receptor potential cation channel, subfamily V, member 4	0.111111	AC=1;AF=0.500;AN=2;BaseQRankSum=0.445;DP=475;Dels=0.00;EFF=NON_SYNONYMOUS_CODING(MODERATE|MISSENSE|Cgc/Ggc|R650G|764|TRPV4||CODING|NM_001177433.1|11|1),NON_SYNONYMOUS_CODING(MODERATE|MISSENSE|Cgc/Ggc|R697G|811|TRPV4||CODING|NM_147204.2|12|1),NON_SYNONYMOUS_CODING(MODERATE|MISSENSE|Cgc/Ggc|R710G|824|TRPV4||CODING|NM_001177428.1|12|1),NON_SYNONYMOUS_CODING(MODERATE|MISSENSE|Cgc/Ggc|R723G|837|TRPV4|…	chr12.110220891-110271212 ; 12q24.11 ; gain
TSC1	tuberous sclerosis 1	0.0555556	AC=2;AF=1.00;AN=2;DB;DP=500;Dels=0.00;EFF=NON_SYNONYMOUS_CODING(MODERATE|MISSENSE|aTg/aCg|M271T|1113|TSC1||CODING|NM_001162427.1|9|1),NON_SYNONYMOUS_CODING(MODERATE|MISSENSE|aTg/aCg|M322T|1163|TSC1||CODING|NM_001162426.1|10|1),NON_SYNONYMOUS_CODING(MODERATE|MISSENSE|aTg/aCg|M322T|1164|TSC1||CODING|NM_000368.4|10|1);FS=0.000;HaplotypeScore=6.3994;MLEAC=2;MLEAF=1.00;MQ=60.00;MQ0=0;QD=31.83	chr9.135766734-135820020 ; 9q34.13 ; loss
TSC2	tuberous sclerosis 2	0.0833333	AC=1;AF=0.500;AN=2;BaseQRankSum=-4.324;DP=499;Dels=0.00;EFF=NON_SYNONYMOUS_CODING(MODERATE|MISSENSE|cAg/cGg|Q732R|1740|TSC2||CODING|NM_001077183.1|20|1),NON_SYNONYMOUS_CODING(MODERATE|MISSENSE|cAg/cGg|Q732R|1784|TSC2||CODING|NM_001114382.1|20|1),NON_SYNONYMOUS_CODING(MODERATE|MISSENSE|cAg/cGg|Q732R|1807|TSC2||CODING|NM_000548.3|20|1);FS=0.349;HaplotypeScore=6.6311;MLEAC=1;MLEAF=0.500;MQ=60.00;MQ0…	chr16.2097989-2138713 ; 16p13.3 ; gain
TSNARE1	t-SNARE domain containing 1	0.5	AC=1;AF=0.500;AN=2;BaseQRankSum=10.138;DB;DP=500;Dels=0.00;EFF=NON_SYNONYMOUS_CODING(MODERATE|MISSENSE|Gtc/Atc|V268I|513|TSNARE1||CODING|NM_145003.3|5|1);FS=1.107;HaplotypeScore=11.4343;MLEAC=1;MLEAF=0.500;MQ=60.00;MQ0=0;MQRankSum=0.942;QD=11.76;ReadPosRankSum=1.274	chr8.143293440-143484543 ; 8q24.3 ; gain
TST	thiosulfate sulfurtransferase (rhodanese)	0.0555556	AC=1;AF=0.500;AN=2;BaseQRankSum=5.559;DP=500;Dels=0.00;EFF=NON_SYNONYMOUS_CODING(MODERATE|MISSENSE|Tgg/Agg|W279R|297|TST||CODING|NM_001270483.1|3|1),NON_SYNONYMOUS_CODING(MODERATE|MISSENSE|Tgg/Agg|W279R|297|TST||CODING|NM_003312.5|3|1),UPSTREAM(MODIFIER||||195|TEX33||CODING|NM_178552.3||1),UPSTREAM(MODIFIER||||280|TEX33||CODING|NM_001163857.1||1);FS=7.168;HaplotypeScore=12.5050;MLEAC=1;MLEAF=0.50…	chr22.37406899-37416224 ; 22q12.3 ; gain
TTC23	tetratricopeptide repeat domain 23	0.0555556	AC=1;AF=0.500;AN=2;BaseQRankSum=-9.035;DP=500;Dels=0.00;EFF=NON_SYNONYMOUS_CODING(MODERATE|MISSENSE|tCc/tTc|S121F|447|TTC23||CODING|NM_001040655.1|6|1),NON_SYNONYMOUS_CODING(MODERATE|MISSENSE|tCc/tTc|S121F|447|TTC23||CODING|NM_001040656.1|4|1),NON_SYNONYMOUS_CODING(MODERATE|MISSENSE|tCc/tTc|S121F|447|TTC23||CODING|NM_001040657.1|5|1),NON_SYNONYMOUS_CODING(MODERATE|MISSENSE|tCc/tTc|S121F|447|TTC23…	chr15.99676527-99789815 ; 15q26.3 ; gain
TTC29	tetratricopeptide repeat domain 29	0.333333	AC=1;AF=0.500;AN=2;BaseQRankSum=-14.536;DB;DP=500;Dels=0.00;EFF=NON_SYNONYMOUS_CODING(MODERATE|MISSENSE|Gcc/Acc|A276T|475|TTC29||CODING|NM_031956.2|8|1);FS=10.171;HaplotypeScore=9.0612;MLEAC=1;MLEAF=0.500;MQ=60.00;MQ0=0;MQRankSum=1.130;QD=8.74;ReadPosRankSum=0.155	chr4.147628178-147867034 ; 4q31.22 ; loss
TTLL13	tubulin tyrosine ligase-like family, member 13	0.388889	AC=1;AF=0.500;AN=2;BaseQRankSum=-2.195;DB;DP=500;Dels=0.00;EFF=NON_SYNONYMOUS_CODING(MODERATE|MISSENSE|Gct/Act|A126T|459|TTLL13||CODING|NM_001029964.2|4|1);FS=1.986;HaplotypeScore=8.0529;MLEAC=1;MLEAF=0.500;MQ=60.00;MQ0=0;MQRankSum=-0.679;QD=13.78;ReadPosRankSum=-0.198	chr15.90792763-90802312 ; 15q26.1 ; gain
TTLL2	tubulin tyrosine ligase-like family, member 2	0.111111	AC=1;AF=0.500;AN=2;BaseQRankSum=9.840;DB;DP=500;Dels=0.00;EFF=NON_SYNONYMOUS_CODING(MODERATE|MISSENSE|aAa/aCa|K441T|592|TTLL2||CODING|NM_031949.4|3|1);FS=0.736;HaplotypeScore=5.3879;MLEAC=1;MLEAF=0.500;MQ=60.00;MQ0=0;MQRankSum=-0.117;QD=16.27;ReadPosRankSum=-0.774 , AC=1;AF=0.500;AN=2;BaseQRankSum=-7.903;DB;DP=500;Dels=0.00;EFF=NON_SYNONYMOUS_CODING(MODERATE|MISSENSE|caG/caT|Q529H|592|TTLL2||CODI…	chr6.167738573-167756177 ; 6q27 ; loss
TTLL7	tubulin tyrosine ligase-like family, member 7	0.0555556	NA	chr1.84335056-84464833 ; 1p31.1 ; loss
TUBA3C	tubulin, alpha 3d; tubulin, alpha 3c	0.138889	AC=1;AF=0.500;AN=2;BaseQRankSum=-8.739;DP=500;Dels=0.00;EFF=NON_SYNONYMOUS_CODING(MODERATE|MISSENSE|tGt/tTt|C200F|450|TUBA3C||CODING|NM_006001.2|4|1);FS=5.214;HaplotypeScore=4.5701;MLEAC=1;MLEAF=0.500;MQ=42.01;MQ0=10;MQRankSum=9.228;QD=10.41;ReadPosRankSum=-0.631	chr13.19747909-19755992 ; 13q12.11 ; gain
TUBD1	tubulin, delta 1	0.5	AC=2;AF=1.00;AN=2;BaseQRankSum=0.004;DB;DP=500;Dels=0.00;EFF=INTRON(MODIFIER||||237|TUBD1||CODING|NM_001193613.1|1|1),NON_SYNONYMOUS_CODING(MODERATE|MISSENSE|aTg/aCg|M76T|351|TUBD1||CODING|NM_001193611.1|3|1),NON_SYNONYMOUS_CODING(MODERATE|MISSENSE|aTg/aCg|M76T|396|TUBD1||CODING|NM_001193610.1|3|1),NON_SYNONYMOUS_CODING(MODERATE|MISSENSE|aTg/aCg|M76T|398|TUBD1||CODING|NM_001193609.1|3|1),NON_SYNO…	chr17.57936840-57970306 ; 17q23.1 ; loss
TUBGCP5	tubulin, gamma complex associated protein 5	0.166667	AC=1;AF=0.500;AN=2;BaseQRankSum=11.527;DP=500;Dels=0.00;EFF=NON_SYNONYMOUS_CODING(MODERATE|MISSENSE|cGg/cAg|R470Q|1024|TUBGCP5||CODING|NM_001102610.1|12|1),NON_SYNONYMOUS_CODING(MODERATE|MISSENSE|cGg/cAg|R470Q|1024|TUBGCP5||CODING|NM_052903.4|12|1);FS=0.000;HaplotypeScore=15.7121;MLEAC=1;MLEAF=0.500;MQ=60.00;MQ0=0;MQRankSum=-0.613;QD=12.26;ReadPosRankSum=1.878	chr15.22833394-22873891 ; 15q11.2 ; gain
TULP1	tubby like protein 1	0.444444	AC=1;AF=0.500;AN=2;BaseQRankSum=8.718;DB;DP=499;Dels=0.00;EFF=NON_SYNONYMOUS_CODING(MODERATE|MISSENSE|aTa/aCa|I259T|542|TULP1||CODING|NM_003322.3|8|1);FS=0.000;HaplotypeScore=5.1899;MLEAC=1;MLEAF=0.500;MQ=59.92;MQ0=0;MQRankSum=-0.038;QD=5.96;ReadPosRankSum=0.603	chr6.35465650-35480647 ; 6p21.31 ; gain
TYK2	tyrosine kinase 2	0.0555556	AC=2;AF=1.00;AN=2;BaseQRankSum=-1.870;DP=434;Dels=0.00;EFF=NON_SYNONYMOUS_CODING(MODERATE|MISSENSE|gGc/gTc|G320V|1187|TYK2||CODING|NM_003331.4|7|1);FS=0.000;HaplotypeScore=6.6865;MLEAC=2;MLEAF=1.00;MQ=60.00;MQ0=0;MQRankSum=-0.245;QD=28.61;ReadPosRankSum=-1.928	chr19.10461203-10491248 ; 19p13.2 ; loss
TYSND1	trypsin domain containing 1	0.0555556	NA	chr10.71897736-71906496 ; 10q22.1 ; gain
UBE2Q1	ubiquitin-conjugating enzyme E2Q family member 1	0.305556	AC=1;AF=0.500;AN=2;BaseQRankSum=2.207;DB;DP=500;Dels=0.00;EFF=DOWNSTREAM(MODIFIER||||422|UBE2Q1||CODING|NM_017582.6||1),NON_SYNONYMOUS_CODING(MODERATE|MISSENSE|cGa/cAa|R181Q|351|TDRD10||CODING|NM_182499.3|9|1),NON_SYNONYMOUS_CODING(MODERATE|MISSENSE|cGa/cAa|R181Q|366|TDRD10||CODING|NM_001098475.1|9|1);FS=6.650;HaplotypeScore=11.1807;MLEAC=1;MLEAF=0.500;MQ=60.00;MQ0=0;MQRankSum=0.100;QD=23.99;Read…	chr1.154521050-154531120 ; 1q21.3 ; gain
UBE2Q2	ubiquitin-conjugating enzyme E2Q family member 2	0.25	AC=1;AF=0.500;AN=2;BaseQRankSum=8.218;DP=488;Dels=0.00;EFF=NON_SYNONYMOUS_CODING(MODERATE|MISSENSE|caC/caA|H21Q|375|UBE2Q2||CODING|NM_173469.2|1|1),UPSTREAM(MODIFIER||||359|UBE2Q2||CODING|NM_001145335.1||1);FS=44.958;HaplotypeScore=7.0729;MLEAC=1;MLEAF=0.500;MQ=59.99;MQ0=0;MQRankSum=-0.731;QD=1.79;ReadPosRankSum=-3.721	chr15.76135621-76193388 ; 15q24.2 ; gain
UBE3B	ubiquitin protein ligase E3B	0.138889	AC=1;AF=0.500;AN=2;BaseQRankSum=-1.454;DP=500;Dels=0.00;EFF=NON_SYNONYMOUS_CODING(MODERATE|MISSENSE|gGg/gTg|G448V|1068|UBE3B||CODING|NM_130466.3|14|1),NON_SYNONYMOUS_CODING(MODERATE|MISSENSE|gGg/gTg|G448V|1068|UBE3B||CODING|NM_183415.2|14|1);FS=2.599;HaplotypeScore=7.5656;MLEAC=1;MLEAF=0.500;MQ=60.00;MQ0=0;MQRankSum=-0.038;QD=6.59;ReadPosRankSum=-0.156	chr12.109915427-109974510 ; 12q24.11 ; gain
UBN2	ubinuclein 2	0.138889	NA	chr7.138916230-138992982 ; 7q34 ; gain
UBR4	ubiquitin protein ligase E3 component n-recognin 4	0.0555556	AC=1;AF=0.500;AN=2;BaseQRankSum=-6.844;DP=498;Dels=0.00;EFF=NON_SYNONYMOUS_CODING(MODERATE|MISSENSE|gGc/gTc|G3524V|5183|UBR4||CODING|NM_020765.2|72|1);FS=0.333;HaplotypeScore=4.5222;MLEAC=1;MLEAF=0.500;MQ=60.00;MQ0=0;MQRankSum=0.185;QD=13.15;ReadPosRankSum=0.943	chr1.19400999-19536746 ; 1p36.13 ; loss
UCKL1	uridine-cytidine kinase 1-like 1	0.0833333	AC=1;AF=0.500;AN=2;BaseQRankSum=-0.993;DP=500;Dels=0.00;EFF=NON_SYNONYMOUS_CODING(MODERATE|MISSENSE|Gag/Cag|E229Q|533|UCKL1||CODING|NM_001193379.1|6|1),NON_SYNONYMOUS_CODING(MODERATE|MISSENSE|Gag/Cag|E244Q|548|UCKL1||CODING|NM_017859.3|6|1),UPSTREAM(MODIFIER|||||MIR1914||NON_CODING|NR_031735.1||1),UPSTREAM(MODIFIER|||||MIR647||NON_CODING|NR_030377.1||1);FS=1.669;HaplotypeScore=7.2558;MLEAC=1;MLEA…	chr20.62571181-62587800 ; 20q13.33 ; gain
UFC1	ubiquitin-fold modifier conjugating enzyme 1	0.138889	AC=1;AF=0.500;AN=2;BaseQRankSum=-0.162;DP=500;Dels=0.00;EFF=DOWNSTREAM(MODIFIER||||167|UFC1||CODING|NM_016406.3||1),NON_SYNONYMOUS_CODING(MODERATE|MISSENSE|cGa/cTa|R22L|565|USP21||CODING|NM_001014443.2|3|1),NON_SYNONYMOUS_CODING(MODERATE|MISSENSE|cGa/cTa|R22L|565|USP21||CODING|NM_012475.4|2|1);FS=2.813;HaplotypeScore=8.3140;MLEAC=1;MLEAF=0.500;MQ=59.96;MQ0=0;MQRankSum=0.972;QD=13.09;ReadPosRankSu…	chr1.161123533-161128646 ; 1q23.3 ; gain
UGT1A9	UDP glucuronosyltransferase 1 family, polypeptide A3; UDP glucuronosyltransferase 1 family, polypeptide A5; UDP glucuronosyltransferase 1 family, polypeptide A4; UDP glucuronosyltransferase 1 family, polypeptide A7; UDP glucuronosyltransferase 1 family, polypeptide A6; UDP glucuronosyltransferase 1 family, polypeptide A10; UDP glucuronosyltransferase 1 family, polypeptide A9; UDP glucuronosyltran…	0.0555556	NA	chr2.234580543-234681951 ; 2q37.1 ; gain
UGT2B7	UDP glucuronosyltransferase 2 family, polypeptide B7	0.0555556	AC=1;AF=0.500;AN=2;BaseQRankSum=8.241;DP=500;Dels=0.00;EFF=NON_SYNONYMOUS_CODING(MODERATE|MISSENSE|aaC/aaA|N322K|529|UGT2B7||CODING|NM_001074.2|3|1);FS=4.941;HaplotypeScore=6.3107;MLEAC=1;MLEAF=0.500;MQ=58.94;MQ0=0;MQRankSum=2.058;QD=13.26;ReadPosRankSum=-2.230	chr4.69962192-69978705 ; 4q13.2 ; gain
UNC13B	unc-13 homolog B (C. elegans)	0.138889	AC=1;AF=0.500;AN=2;BaseQRankSum=4.204;DP=500;Dels=0.00;EFF=NON_SYNONYMOUS_CODING(MODERATE|MISSENSE|Aca/Tca|T22S|1591|UNC13B||CODING|NM_006377.3|3|1);FS=7.005;HaplotypeScore=1.9940;MLEAC=1;MLEAF=0.500;MQ=60.00;MQ0=0;MQRankSum=-0.850;QD=17.11;ReadPosRankSum=-0.313	chr9.35161988-35405332 ; 9p13.3 ; gain
UNC93A	unc-93 homolog A (C. elegans)	0.222222	AC=1;AF=0.500;AN=2;BaseQRankSum=5.913;DB;DP=499;Dels=0.00;EFF=NON_SYNONYMOUS_CODING(MODERATE|MISSENSE|Gtc/Atc|V367I|415|UNC93A||CODING|NM_001143947.1|7|1),NON_SYNONYMOUS_CODING(MODERATE|MISSENSE|Gtc/Atc|V409I|457|UNC93A||CODING|NM_018974.3|8|1);FS=24.951;HaplotypeScore=4.5562;MLEAC=1;MLEAF=0.500;MQ=38.12;MQ0=9;MQRankSum=5.149;QD=8.02;ReadPosRankSum=0.690	chr6.167704802-167729502 ; 6q27 ; loss
USH2A	Usher syndrome 2A (autosomal recessive, mild)	0.555556	AC=1;AF=0.500;AN=2;BaseQRankSum=1.436;DP=500;Dels=0.00;EFF=NON_SYNONYMOUS_CODING(MODERATE|MISSENSE|Aat/Tat|N1071Y|1546|USH2A||CODING|NM_007123.5|16|1),NON_SYNONYMOUS_CODING(MODERATE|MISSENSE|Aat/Tat|N1071Y|5202|USH2A||CODING|NM_206933.2|16|1);FS=2.015;HaplotypeScore=1.9931;MLEAC=1;MLEAF=0.500;MQ=59.89;MQ0=0;MQRankSum=1.610;QD=14.58;ReadPosRankSum=2.400	chr1.215796235-216596738 ; 1q41 ; loss
USP18	ubiquitin specific peptidase 18	0.527778	AC=2;AF=1.00;AN=2;DB;DP=500;Dels=0.00;EFF=NON_SYNONYMOUS_CODING(MODERATE|MISSENSE|aCg/aTg|T169M|372|USP18||CODING|NM_017414.3|6|1);FS=0.000;HaplotypeScore=5.6414;MLEAC=2;MLEAF=1.00;MQ=46.69;MQ0=4;QD=32.94	chr22.18632757-18660162 ; 22q11.21 ; gain
USP2	ubiquitin specific peptidase 2	0.111111	AC=2;AF=1.00;AN=2;BaseQRankSum=-0.772;DP=500;Dels=0.00;EFF=INTRON(MODIFIER||||362|USP2||CODING|NM_001243759.1|1|1),NON_SYNONYMOUS_CODING(MODERATE|MISSENSE|Gac/Aac|D145N|605|USP2||CODING|NM_004205.4|2|1);FS=0.000;HaplotypeScore=5.4768;MLEAC=2;MLEAF=1.00;MQ=60.00;MQ0=0;MQRankSum=-0.543;QD=34.15;ReadPosRankSum=-1.280	chr11.119225924-119252436 ; 11q23.3 ; gain
USP21	ubiquitin specific peptidase 21	0.138889	NA	chr1.161129253-161135516 ; 1q23.3 ; gain
USP24	ubiquitin specific peptidase 24	0.111111	AC=1;AF=0.500;AN=2;BaseQRankSum=-11.099;DP=500;Dels=0.00;EFF=NON_SYNONYMOUS_CODING(MODERATE|MISSENSE|gGa/gTa|G293V|2620|USP24||CODING|NM_015306.2|7|1);FS=6.292;HaplotypeScore=3.8980;MLEAC=1;MLEAF=0.500;MQ=59.99;MQ0=0;MQRankSum=0.969;QD=16.12;ReadPosRankSum=-0.476	chr1.55532031-55681039 ; 1p32.3 ; gain
USP29	ubiquitin specific peptidase 29	0.694444	AC=1;AF=0.500;AN=2;BaseQRankSum=-12.427;DB;DP=500;Dels=0.00;EFF=DOWNSTREAM(MODIFIER||||922|USP29||CODING|NM_020903.2||1),NON_SYNONYMOUS_CODING(MODERATE|MISSENSE|Aat/Gat|N157D|472|ZIM3||CODING|NM_052882.1|5|1);FS=1.156;HaplotypeScore=7.4968;MLEAC=1;MLEAF=0.500;MQ=60.00;MQ0=0;MQRankSum=-0.582;QD=10.31;ReadPosRankSum=1.538	chr19.57631508-57643293 ; 19q13.43 ; gain
USP34	ubiquitin specific peptidase 34	0.25	AC=1;AF=0.500;AN=2;BaseQRankSum=8.775;DP=500;Dels=0.00;EFF=NON_SYNONYMOUS_CODING(MODERATE|MISSENSE|Ttt/Ctt|F2756L|3546|USP34||CODING|NM_014709.3|68|1);FS=6.210;HaplotypeScore=5.2881;MLEAC=1;MLEAF=0.500;MQ=60.00;MQ0=0;MQRankSum=0.876;QD=2.71;ReadPosRankSum=3.165	chr2.61414589-61697849 ; 2p15 ; loss
UTP20	similar to Down-regulated in metastasis protein (Key-1A6 protein) (Novel nucleolar protein 73) (NNP73); UTP20, small subunit (SSU) processome component, homolog (yeast)	0.111111	AC=1;AF=0.500;AN=2;BaseQRankSum=8.202;DP=499;Dels=0.00;EFF=NON_SYNONYMOUS_CODING(MODERATE|MISSENSE|aTc/aCc|I2130T|2785|UTP20||CODING|NM_014503.2|49|1);FS=1.085;HaplotypeScore=9.3773;MLEAC=1;MLEAF=0.500;MQ=59.98;MQ0=0;MQRankSum=-1.918;QD=10.96;ReadPosRankSum=-0.358	chr12.101673904-101780397 ; 12q23.2 ; gain
UVRAG	UV radiation resistance associated gene	0.0555556	AC=1;AF=0.500;AN=2;BaseQRankSum=5.201;DP=500;Dels=0.00;EFF=NON_SYNONYMOUS_CODING(MODERATE|MISSENSE|tgG/tgC|W131C|699|UVRAG||CODING|NM_003369.3|4|1);FS=3.807;HaplotypeScore=3.8108;MLEAC=1;MLEAF=0.500;MQ=60.00;MQ0=0;MQRankSum=-0.815;QD=7.14;ReadPosRankSum=0.050	chr11.75526211-75855282 ; 11q13.5 ; gain
VAC14	Vac14 homolog (S. cerevisiae)	0.0833333	AC=1;AF=0.500;AN=2;BaseQRankSum=9.719;DP=500;Dels=0.00;EFF=INTRON(MODIFIER|||||LOC100130894||NON_CODING|NR_034083.1|3|1),NON_SYNONYMOUS_CODING(MODERATE|MISSENSE|Gac/Tac|D398Y|782|VAC14||CODING|NM_018052.3|11|1);FS=16.950;HaplotypeScore=4.3768;MLEAC=1;MLEAF=0.500;MQ=60.00;MQ0=0;MQRankSum=1.916;QD=14.50;ReadPosRankSum=-1.843	chr16.70721341-70835061 ; 16q22.1 ; gain
VAV3	vav 3 guanine nucleotide exchange factor	0.25	AC=1;AF=0.500;AN=2;BaseQRankSum=-3.121;DB;DP=500;Dels=0.00;EFF=NON_SYNONYMOUS_CODING(MODERATE|MISSENSE|caG/caC|Q58H|287|VAV3||CODING|NM_001079874.1|3|1),NON_SYNONYMOUS_CODING(MODERATE|MISSENSE|caG/caC|Q618H|847|VAV3||CODING|NM_006113.4|20|1);FS=2.758;HaplotypeScore=5.2137;MLEAC=1;MLEAF=0.500;MQ=60.00;MQ0=0;MQRankSum=-0.120;QD=14.34;ReadPosRankSum=1.676	chr1.108113781-108507545 ; 1p13.3 ; loss
VCL	vinculin	0.0555556	AC=1;AF=0.500;AN=2;BaseQRankSum=-6.676;DP=500;Dels=0.00;EFF=INTRON(MODIFIER||||1066|VCL||CODING|NM_003373.3|18|1),NON_SYNONYMOUS_CODING(MODERATE|MISSENSE|cCt/cGt|P951R|1134|VCL||CODING|NM_014000.2|19|1);FS=1.502;HaplotypeScore=3.8114;MLEAC=1;MLEAF=0.500;MQ=60.00;MQ0=0;MQRankSum=-1.589;QD=10.53;ReadPosRankSum=1.000	chr10.75757871-75879914 ; 10q22.2 ; gain
VENTX	VENT homeobox homolog (Xenopus laevis)	0.0833333	AC=1;AF=0.500;AN=2;BaseQRankSum=-5.970;DB;DP=428;Dels=0.00;EFF=NON_SYNONYMOUS_CODING(MODERATE|MISSENSE|gCg/gAg|A226E|258|VENTX||CODING|NM_014468.2|3|1);FS=11.256;HaplotypeScore=10.3320;MLEAC=1;MLEAF=0.500;MQ=60.00;MQ0=0;MQRankSum=0.182;QD=13.75;ReadPosRankSum=1.588	chr10.135051407-135055433 ; 10q26.3 ; gain
VIPR1	vasoactive intestinal peptide receptor 1	0.138889	NA	chr3.42530790-42579065 ; 3p22.1 ; gain
VN1R4	similar to Vomeronasal type-1 receptor 4; vomeronasal 1 receptor 4	0.527778	AC=1;AF=0.500;AN=2;BaseQRankSum=-12.590;DB;DP=500;Dels=0.00;EFF=NON_SYNONYMOUS_CODING(MODERATE|MISSENSE|gCc/gTc|A52V|301|VN1R4||CODING|NM_173857.2|1|1);FS=0.740;HaplotypeScore=5.2372;MLEAC=1;MLEAF=0.500;MQ=53.90;MQ0=7;MQRankSum=2.140;QD=10.86;ReadPosRankSum=0.609	chr19.53770012-53770918 ; 19q13.42 ; gain
VPRBP	Vpr (HIV-1) binding protein	0.138889	NA	chr3.51433297-51534018 ; 3p21.2 ; gain
VPS13B	vacuolar protein sorting 13 homolog B (yeast)	0.25	NA	chr8.100025493-100889814 ; 8q22.2 ; gain
VPS36	vacuolar protein sorting 36 homolog (S. cerevisiae)	0.138889	AC=2;AF=1.00;AN=2;BaseQRankSum=-1.644;DP=500;Dels=0.00;EFF=NON_SYNONYMOUS_CODING(MODERATE|MISSENSE|Gag/Aag|E321K|386|VPS36||CODING|NM_016075.2|12|1);FS=8.309;HaplotypeScore=5.7288;MLEAC=2;MLEAF=1.00;MQ=59.95;MQ0=0;MQRankSum=1.563;QD=33.02;ReadPosRankSum=-0.350	chr13.52986736-53024763 ; 13q14.3 ; gain
WAPAL	wings apart-like homolog (Drosophila)	0.194444	NA	chr10.88195012-88281541 ; 10q23.2 ; gain
WDR11	bromodomain and WD repeat domain containing 2	0.0833333	AC=1;AF=0.500;AN=2;BaseQRankSum=8.570;DB;DP=500;Dels=0.00;EFF=INTRON(MODIFIER|||||MIR5694||NON_CODING|NR_049879.1|3|1),NON_SYNONYMOUS_CODING(MODERATE|MISSENSE|Att/Gtt|I436V|1224|WDR11||CODING|NM_018117.11|10|1);FS=14.663;HaplotypeScore=4.9105;MLEAC=1;MLEAF=0.500;MQ=60.00;MQ0=0;MQRankSum=1.083;QD=14.91;ReadPosRankSum=0.748	chr10.122610686-122669038 ; 10q26.12 ; gain
WDR48	WD repeat domain 48	0.111111	NA	chr3.39093506-39137881 ; 3p22.2 ; gain
WDR66	WD repeat domain 66	0.111111	AC=1;AF=0.500;AN=2;BaseQRankSum=-12.459;DP=500;Dels=0.00;EFF=DOWNSTREAM(MODIFIER||||941|WDR66||CODING|NM_001178003.1||1),NON_SYNONYMOUS_CODING(MODERATE|MISSENSE|Gag/Aag|E1001K|1149|WDR66||CODING|NM_144668.5|19|1);FS=8.590;HaplotypeScore=6.2150;MLEAC=1;MLEAF=0.500;MQ=59.98;MQ0=0;MQRankSum=-1.475;QD=12.83;ReadPosRankSum=-1.165	chr12.122356462-122441832 ; 12q24.31 ; gain
WDR72	WD repeat domain 72	0.305556	AC=1;AF=0.500;AN=2;BaseQRankSum=-1.332;DB;DP=500;Dels=0.00;EFF=NON_SYNONYMOUS_CODING(MODERATE|MISSENSE|Ctc/Ttc|L819F|1102|WDR72||CODING|NM_182758.2|15|1);FS=12.957;HaplotypeScore=8.9357;MLEAC=1;MLEAF=0.500;MQ=60.00;MQ0=0;MQRankSum=0.893;QD=10.74;ReadPosRankSum=1.188	chr15.53805937-54055075 ; 15q21.3 ; gain
WDR93	WD repeat domain 93	0.111111	AC=1;AF=0.500;AN=2;BaseQRankSum=-11.210;DP=500;Dels=0.00;EFF=NON_SYNONYMOUS_CODING(MODERATE|MISSENSE|Ctt/Ttt|L279F|686|WDR93||CODING|NM_020212.1|8|1);FS=1.433;HaplotypeScore=6.3301;MLEAC=1;MLEAF=0.500;MQ=60.00;MQ0=0;MQRankSum=2.358;QD=13.97;ReadPosRankSum=-2.325	chr15.90234027-90286869 ; 15q26.1 ; gain
WIPF2	WAS/WASL interacting protein family, member 2	0.0555556	AC=1;AF=0.500;AN=2;BaseQRankSum=-10.057;DP=500;Dels=0.00;EFF=NON_SYNONYMOUS_CODING(MODERATE|MISSENSE|gGa/gTa|G214V|440|WIPF2||CODING|NM_133264.4|5|1);FS=3.655;HaplotypeScore=9.6452;MLEAC=1;MLEAF=0.500;MQ=59.98;MQ0=0;MQRankSum=0.741;QD=15.87;ReadPosRankSum=-0.072	chr17.38375573-38438439 ; 17q21.1 ; gain
WNT3	wingless-type MMTV integration site family, member 3	0.0833333	NA	chr17.44839871-44896126 ; 17q21.31 ; gain
WNT5A	wingless-type MMTV integration site family, member 5A	0.138889	NA	chr3.55499742-55521670 ; 3p14.3 ; gain
WNT9B	wingless-type MMTV integration site family, member 9B	0.0833333	AC=1;AF=0.500;AN=2;BaseQRankSum=-1.806;DP=278;Dels=0.00;EFF=NON_SYNONYMOUS_CODING(MODERATE|MISSENSE|Cag/Aag|Q334K|357|WNT9B||CODING|NM_003396.1|4|1);FS=2.029;HaplotypeScore=2.6927;MLEAC=1;MLEAF=0.500;MQ=60.00;MQ0=0;MQRankSum=-0.376;QD=12.61;ReadPosRankSum=1.035	chr17.44928967-44954437 ; 17q21.32 ; gain
XIRP2	xin actin-binding repeat containing 2	0.111111	AC=1;AF=0.500;AN=2;BaseQRankSum=-7.354;DP=500;Dels=0.00;EFF=NON_SYNONYMOUS_CODING(MODERATE|MISSENSE|Gaa/Aaa|E302K|3549|XIRP2||CODING|NM_152381.5|6|1),NON_SYNONYMOUS_CODING(MODERATE|MISSENSE|Gaa/Aaa|E302K|938|XIRP2||CODING|NM_001079810.3|6|1),NON_SYNONYMOUS_CODING(MODERATE|MISSENSE|Gaa/Aaa|E335K|971|XIRP2||CODING|NM_001199143.1|7|1),NON_SYNONYMOUS_CODING(MODERATE|MISSENSE|Gaa/Aaa|E80K|3327|XIRP2||…	chr2.167744996-168116261 ; 2q24.3 ; loss
XPC	xeroderma pigmentosum, complementation group C	0.416667	AC=2;AF=1.00;AN=2;DB;DP=500;Dels=0.00;EFF=EXON(MODIFIER|||||XPC||CODING|NR_027299.1|8|1),NON_SYNONYMOUS_CODING(MODERATE|MISSENSE|gCg/gTg|A462V|903|XPC||CODING|NM_001145769.1|9|1),NON_SYNONYMOUS_CODING(MODERATE|MISSENSE|gCg/gTg|A499V|940|XPC||CODING|NM_004628.4|9|1);FS=0.000;HaplotypeScore=1.7333;MLEAC=2;MLEAF=1.00;MQ=60.00;MQ0=0;QD=32.87	chr3.14186647-14220172 ; 3p25.1 ; gain
XPO4	exportin 4	0.527778	NA	chr13.21351467-21476913 ; 13q12.11 ; gain
YIPF7	Yip1 domain family, member 7	0.0555556	AC=1;AF=0.500;AN=2;BaseQRankSum=8.552;DP=500;Dels=0.00;EFF=NON_SYNONYMOUS_CODING(MODERATE|MISSENSE|gGt/gCt|G49A|280|YIPF7||CODING|NM_182592.2|2|1);FS=3.870;HaplotypeScore=6.2033;MLEAC=1;MLEAF=0.500;MQ=60.00;MQ0=0;MQRankSum=0.114;QD=4.77;ReadPosRankSum=-0.807	chr4.44624353-44653658 ; 4p12 ; gain
YTHDF1	YTH domain family, member 1	0.0833333	NA	chr20.61826781-61847538 ; 20q13.33 ; gain
ZBP1	Z-DNA binding protein 1	0.0555556	AC=1;AF=0.500;AN=2;BaseQRankSum=-2.749;DP=500;Dels=0.00;EFF=DOWNSTREAM(MODIFIER||||248|ZBP1||CODING|NM_001160419.2||1),NON_SYNONYMOUS_CODING(MODERATE|MISSENSE|gAg/gCg|E284A|354|ZBP1||CODING|NM_001160418.1|6|1),NON_SYNONYMOUS_CODING(MODERATE|MISSENSE|gAg/gCg|E358A|428|ZBP1||CODING|NM_001160417.1|7|1),NON_SYNONYMOUS_CODING(MODERATE|MISSENSE|gAg/gCg|E359A|429|ZBP1||CODING|NM_030776.2|7|1);FS=0.335;H…	chr20.56178901-56195632 ; 20q13.31 ; gain
ZBTB20	zinc finger and BTB domain containing 20	0.0833333	AC=1;AF=0.500;AN=2;BaseQRankSum=1.586;DP=500;Dels=0.00;EFF=NON_SYNONYMOUS_CODING(MODERATE|MISSENSE|Atg/Ttg|M524L|668|ZBTB20||CODING|NM_001164343.1|11|1),NON_SYNONYMOUS_CODING(MODERATE|MISSENSE|Atg/Ttg|M524L|668|ZBTB20||CODING|NM_001164344.1|7|1),NON_SYNONYMOUS_CODING(MODERATE|MISSENSE|Atg/Ttg|M524L|668|ZBTB20||CODING|NM_001164345.1|6|1),NON_SYNONYMOUS_CODING(MODERATE|MISSENSE|Atg/Ttg|M524L|668|ZB…	chr3.114056946-114866127 ; 3q13.31 ; gain
ZDHHC17	zinc finger, DHHC-type containing 17	0.111111	AC=1;AF=0.500;AN=2;BaseQRankSum=3.761;DP=500;Dels=0.00;EFF=NON_SYNONYMOUS_CODING(MODERATE|MISSENSE|gaA/gaT|E71D|632|ZDHHC17||CODING|NM_015336.2|3|1);FS=0.000;HaplotypeScore=6.8583;MLEAC=1;MLEAF=0.500;MQ=60.00;MQ0=0;MQRankSum=0.038;QD=16.22;ReadPosRankSum=-1.831	chr12.77157853-77247474 ; 12q21.2 ; gain
ZEB1	zinc finger E-box binding homeobox 1	0.0555556	AC=1;AF=0.500;AN=2;BaseQRankSum=-1.399;DP=500;Dels=0.00;EFF=INTRON(MODIFIER||||1057|ZEB1||CODING|NM_001174095.1|1|1),NON_SYNONYMOUS_CODING(MODERATE|MISSENSE|Gat/Cat|D42H|1107|ZEB1||CODING|NM_001174094.1|2|1),NON_SYNONYMOUS_CODING(MODERATE|MISSENSE|Gat/Cat|D42H|1108|ZEB1||CODING|NM_001128128.2|2|1),NON_SYNONYMOUS_CODING(MODERATE|MISSENSE|Gat/Cat|D59H|1104|ZEB1||CODING|NM_001174093.1|2|1),NON_SYNON…	chr10.31608100-31818742 ; 10p11.22 ; gain
ZEB2	zinc finger E-box binding homeobox 2	0.111111	AC=1;AF=0.500;AN=2;BaseQRankSum=1.030;DP=500;Dels=0.00;EFF=NON_SYNONYMOUS_CODING(MODERATE|MISSENSE|aAt/aTt|N445I|1190|ZEB2||CODING|NM_001171653.1|7|1),NON_SYNONYMOUS_CODING(MODERATE|MISSENSE|aAt/aTt|N469I|1214|ZEB2||CODING|NM_014795.3|8|1);FS=4.758;HaplotypeScore=6.2100;MLEAC=1;MLEAF=0.500;MQ=59.94;MQ0=0;MQRankSum=1.807;QD=18.52;ReadPosRankSum=0.299	chr2.145141941-145277958 ; 2q22.3 ; loss
ZFAND3	zinc finger, AN1-type domain 3	0.0833333	NA	chr6.37787306-38122399 ; 6p21.2 ; gain
ZFP106	zinc finger protein 106 homolog (mouse)	0.194444	AC=1;AF=0.500;AN=2;BaseQRankSum=-0.382;DP=500;Dels=0.00;EFF=DOWNSTREAM(MODIFIER||||1883|ZFP106||CODING|NM_022473.1||1),NON_SYNONYMOUS_CODING(MODERATE|MISSENSE|Gag/Cag|E183Q|309|CAPN3||CODING|NM_173088.1|8|1),NON_SYNONYMOUS_CODING(MODERATE|MISSENSE|Gag/Cag|E30Q|156|CAPN3||CODING|NM_173089.1|4|1),NON_SYNONYMOUS_CODING(MODERATE|MISSENSE|Gag/Cag|E30Q|156|CAPN3||CODING|NM_173090.1|5|1),NON_SYNONYMOUS_…	chr15:42412437-42491197 ; 15q15.1 ; gain
ZFP112	zinc finger protein 112 homolog (mouse)	0.138889	AC=1;AF=0.500;AN=2;BaseQRankSum=3.199;DP=500;Dels=0.00;EFF=NON_SYNONYMOUS_CODING(MODERATE|MISSENSE|gGg/gAg|G256E|907|ZFP112||CODING|NM_013380.3|4|1),NON_SYNONYMOUS_CODING(MODERATE|MISSENSE|gGg/gAg|G262E|913|ZFP112||CODING|NM_001083335.1|5|1);FS=3.255;HaplotypeScore=1.8311;MLEAC=1;MLEAF=0.500;MQ=60.00;MQ0=0;MQRankSum=0.342;QD=13.15;ReadPosRankSum=-0.128	chr19.44830705-44860856 ; 19q13.31 ; gain
ZFP42	zinc finger protein 42 homolog (mouse)	0.0833333	AC=1;AF=0.500;AN=2;BaseQRankSum=12.217;DP=499;Dels=0.00;EFF=NON_SYNONYMOUS_CODING(MODERATE|MISSENSE|aCg/aTg|T302M|310|ZFP42||CODING|NM_174900.3|4|1);FS=7.461;HaplotypeScore=2.8051;MLEAC=1;MLEAF=0.500;MQ=60.00;MQ0=0;MQRankSum=-1.104;QD=11.98;ReadPosRankSum=2.377	chr4.188916924-188926199 ; 4q35.2 ; gain
ZFP64	zinc finger protein 64 homolog (mouse)	0.0555556	AC=1;AF=0.500;AN=2;BaseQRankSum=-7.436;DP=414;Dels=0.00;EFF=NON_SYNONYMOUS_CODING(MODERATE|MISSENSE|Tgc/Cgc|C416R|645|ZFP64||CODING|NM_199427.2|9|1);FS=3.748;HaplotypeScore=10.4296;MLEAC=1;MLEAF=0.500;MQ=59.91;MQ0=1;MQRankSum=0.994;QD=11.45;ReadPosRankSum=-1.148	chr20.50700549-50808524 ; 20q13.2 ; gain
ZFPM2	zinc finger protein, multitype 2	0.0833333	NA	chr8.106331146-106816767 ; 8q23.1 ; gain
ZHX2	zinc fingers and homeoboxes 2	0.0833333	AC=1;AF=0.500;AN=2;BaseQRankSum=-5.576;DP=500;Dels=0.00;EFF=NON_SYNONYMOUS_CODING(MODERATE|MISSENSE|gAg/gTg|E204V|837|ZHX2||CODING|NM_014943.3|3|1);FS=7.074;HaplotypeScore=15.0609;MLEAC=1;MLEAF=0.500;MQ=60.00;MQ0=0;MQRankSum=-0.676;QD=17.98;ReadPosRankSum=0.467	chr8.123793900-123986755 ; 8q24.13 ; gain
ZIC1	Zic family member 1 (odd-paired homolog, Drosophila)	0.138889	AC=1;AF=0.500;AN=2;BaseQRankSum=9.839;DP=499;Dels=0.00;EFF=NON_SYNONYMOUS_CODING(MODERATE|MISSENSE|gCg/gAg|A75E|447|ZIC1||CODING|NM_003412.3|1|1),UPSTREAM(MODIFIER||||128|ZIC4||CODING|NM_001243256.1||1),UPSTREAM(MODIFIER||||334|ZIC4||CODING|NM_032153.5||1),UPSTREAM(MODIFIER||||372|ZIC4||CODING|NM_001168379.1||1);FS=4.328;HaplotypeScore=15.1240;MLEAC=1;MLEAF=0.500;MQ=60.00;MQ0=0;MQRankSum=0.586;QD…	chr3.147127180-147134506 ; 3q24 ; gain
ZIM2	paternally expressed 3; PEG3 antisense RNA (non-protein coding); zinc finger, imprinted 2	0.333333	AC=1;AF=0.500;AN=2;BaseQRankSum=6.528;DB;DP=500;Dels=0.00;EFF=EXON(MODIFIER|||||PEG3-AS1||NON_CODING|NR_023847.2|1|1),INTRON(MODIFIER||||527|ZIM2||CODING|NM_001146326.1|8|1),INTRON(MODIFIER||||527|ZIM2||CODING|NM_001146327.1|8|1),INTRON(MODIFIER||||527|ZIM2||CODING|NM_015363.4|7|1),NON_SYNONYMOUS_CODING(MODERATE|MISSENSE|cGc/cAc|R1450H|1462|PEG3||CODING|NM_001146185.1|9|1),NON_SYNONYMOUS_CODING(M…	chr19.57285922-57352097 ; 19q13.43 ; gain
ZMYM2	zinc finger, MYM-type 2	0.138889	AC=2;AF=1.00;AN=2;BaseQRankSum=-2.120;DP=500;Dels=0.00;EFF=NON_SYNONYMOUS_CODING(MODERATE|MISSENSE|aGc/aTc|S1067I|1377|ZMYM2||CODING|NM_001190964.1|21|1),NON_SYNONYMOUS_CODING(MODERATE|MISSENSE|aGc/aTc|S1067I|1377|ZMYM2||CODING|NM_001190965.1|20|1),NON_SYNONYMOUS_CODING(MODERATE|MISSENSE|aGc/aTc|S1067I|1377|ZMYM2||CODING|NM_003453.3|21|1),NON_SYNONYMOUS_CODING(MODERATE|MISSENSE|aGc/aTc|S1067I|137…	chr13.20532809-20665968 ; 13q12.11 ; gain
ZNF107	zinc finger protein 107	0.0555556	NA	chr7.64126510-64171401 ; 7q11.21 ; gain
ZNF117	zinc finger protein 117	0.0555556	AC=1;AF=0.500;AN=2;BaseQRankSum=-5.600;DP=500;Dels=0.00;EFF=NON_SYNONYMOUS_CODING(MODERATE|MISSENSE|Gaa/Caa|E393Q|483|ZNF117||CODING|NM_015852.3|4|1);FS=0.691;HaplotypeScore=8.8150;MLEAC=1;MLEAF=0.500;MQ=59.98;MQ0=0;MQRankSum=1.408;QD=14.78;ReadPosRankSum=0.464	chr7.64434829-64451414 ; 7q11.21 ; gain
ZNF133	zinc finger protein 133	0.194444	AC=1;AF=0.500;AN=2;BaseQRankSum=10.112;DP=500;Dels=0.00;EFF=NON_SYNONYMOUS_CODING(MODERATE|MISSENSE|aAc/aGc|N457S|653|ZNF133||CODING|NM_001083330.1|4|1),NON_SYNONYMOUS_CODING(MODERATE|MISSENSE|aAc/aGc|N457S|653|ZNF133||CODING|NM_003434.4|7|1);FS=4.337;HaplotypeScore=6.7053;MLEAC=1;MLEAF=0.500;MQ=59.96;MQ0=0;MQRankSum=-0.159;QD=13.72;ReadPosRankSum=1.241	chr20.18269120-18297640 ; 20p11.23 ; gain
ZNF138	zinc finger protein 138	0.638889	AC=2;AF=1.00;AN=2;BaseQRankSum=-1.588;DB;DP=500;Dels=0.00;EFF=EXON(MODIFIER|||||ZNF138||CODING|NR_073391.1|5|1),INTRON(MODIFIER|||||ZNF138||CODING|NR_073389.1|2|1),NON_SYNONYMOUS_CODING(MODERATE|MISSENSE|gGa/gAa|G119E|319|ZNF138||CODING|NM_001271639.1|4|1),NON_SYNONYMOUS_CODING(MODERATE|MISSENSE|gGa/gAa|G87E|287|ZNF138||CODING|NM_001271638.1|4|1),NON_SYNONYMOUS_CODING(MODERATE|MISSENSE|gGa/gAa|G9…	chr7.64254765-64314178 ; 7q11.21 ; gain
ZNF214	zinc finger protein 214	0.0555556	AC=1;AF=0.500;AN=2;BaseQRankSum=11.169;DP=499;Dels=0.00;EFF=NON_SYNONYMOUS_CODING(MODERATE|MISSENSE|aAc/aGc|N175S|606|ZNF214||CODING|NM_013249.2|3|1);FS=1.439;HaplotypeScore=5.4150;MLEAC=1;MLEAF=0.500;MQ=60.00;MQ0=0;MQRankSum=0.451;QD=14.33;ReadPosRankSum=0.385	chr11.7020548-7041586 ; 11p15.4 ; gain
ZNF230	zinc finger protein 230	0.305556	AC=1;AF=0.500;AN=2;BaseQRankSum=-10.114;DB;DP=499;Dels=0.00;EFF=NON_SYNONYMOUS_CODING(MODERATE|MISSENSE|gaC/gaA|D441E|474|ZNF230||CODING|NM_006300.3|5|1);FS=0.827;HaplotypeScore=7.8217;MLEAC=1;MLEAF=0.500;MQ=58.50;MQ0=0;MQRankSum=3.324;QD=13.69;ReadPosRankSum=-2.043	chr19.44507076-44518072 ; 19q13.31 ; gain
ZNF257	zinc finger protein 257	0.0833333	AC=1;AF=0.500;AN=2;BaseQRankSum=-4.919;DP=500;Dels=0.00;EFF=NON_SYNONYMOUS_CODING(MODERATE|MISSENSE|Caa/Aaa|Q135K|563|ZNF257||CODING|NM_033468.2|4|1);FS=11.514;HaplotypeScore=22.1969;MLEAC=1;MLEAF=0.500;MQ=59.81;MQ0=0;MQRankSum=1.001;QD=17.90;ReadPosRankSum=-0.893	chr19.22235265-22273903 ; 19p12 ; gain
ZNF286B	zinc finger protein 286B	0.5	AC=1;AF=0.500;AN=2;BaseQRankSum=3.805;DB;DP=500;Dels=0.00;EFF=DOWNSTREAM(MODIFIER|||||FOXO3B||NON_CODING|NR_026718.1||1),NON_SYNONYMOUS_CODING(MODERATE|MISSENSE|aCc/aGc|T490S|522|ZNF286B||CODING|NM_001145045.1|5|1);FS=4.360;HaplotypeScore=11.5624;MLEAC=1;MLEAF=0.500;MQ=53.73;MQ0=7;MQRankSum=6.110;QD=14.15;ReadPosRankSum=-0.075	chr17.18561741-18585572 ; 17p11.2 ; gain
ZNF317	zinc finger protein 317	0.333333	AC=1;AF=0.500;AN=2;BaseQRankSum=-5.812;DB;DP=500;Dels=0.00;EFF=NON_SYNONYMOUS_CODING(MODERATE|MISSENSE|caG/caT|Q19H|563|ZNF317||CODING|NM_001190791.1|3|1),NON_SYNONYMOUS_CODING(MODERATE|MISSENSE|caG/caT|Q19H|595|ZNF317||CODING|NM_020933.4|3|1);FS=6.811;HaplotypeScore=3.8190;MLEAC=1;MLEAF=0.500;MQ=59.97;MQ0=0;MQRankSum=1.471;QD=13.10;ReadPosRankSum=-1.860	chr19.9251055-9274091 ; 19p13.2 ; loss
ZNF318	zinc finger protein 318	0.0555556	AC=1;AF=0.500;AN=2;BaseQRankSum=-0.861;DP=500;Dels=0.00;EFF=NON_SYNONYMOUS_CODING(MODERATE|MISSENSE|tTg/tGg|L367W|2279|ZNF318||CODING|NM_014345.2|3|1);FS=8.253;HaplotypeScore=5.8821;MLEAC=1;MLEAF=0.500;MQ=60.00;MQ0=0;MQRankSum=0.199;QD=9.24;ReadPosRankSum=-1.073	chr6.43303807-43337181 ; 6p21.1 ; gain
ZNF382	zinc finger protein 382	0.111111	AC=1;AF=0.500;AN=2;BaseQRankSum=-12.905;DP=500;Dels=0.00;EFF=NON_SYNONYMOUS_CODING(MODERATE|MISSENSE|aGa/aTa|R98I|549|ZNF382||CODING|NM_001256838.1|5|1),NON_SYNONYMOUS_CODING(MODERATE|MISSENSE|aGa/aTa|R99I|550|ZNF382||CODING|NM_032825.4|5|1);FS=3.283;HaplotypeScore=6.3019;MLEAC=1;MLEAF=0.500;MQ=60.00;MQ0=0;MQRankSum=0.657;QD=12.91;ReadPosRankSum=0.114	chr19.37096206-37119499 ; 19q13.12 ; gain
ZNF383	zinc finger protein 383	0.111111	AC=1;AF=0.500;AN=2;BaseQRankSum=-10.168;DP=500;Dels=0.00;EFF=NON_SYNONYMOUS_CODING(MODERATE|MISSENSE|cAg/cGg|Q189R|475|ZNF383||CODING|NM_152604.1|5|1);FS=20.043;HaplotypeScore=6.5695;MLEAC=1;MLEAF=0.500;MQ=60.00;MQ0=0;MQRankSum=2.161;QD=9.17;ReadPosRankSum=-1.849	chr19.37717365-37734574 ; 19q13.12 ; gain
ZNF408	zinc finger protein 408	0.0833333	NA	chr11.46722316-46727466 ; 11p11.2 ; gain
ZNF425	zinc finger protein 425	0.0555556	AC=1;AF=0.500;AN=2;BaseQRankSum=-9.094;DP=500;Dels=0.00;EFF=NON_SYNONYMOUS_CODING(MODERATE|MISSENSE|Aca/Gca|T59A|752|ZNF425||CODING|NM_001001661.2|3|1);FS=5.633;HaplotypeScore=5.4461;MLEAC=1;MLEAF=0.500;MQ=60.00;MQ0=0;MQRankSum=1.388;QD=12.08;ReadPosRankSum=2.333	chr7.148799877-148823438 ; 7q36.1 ; loss
ZNF429	zinc finger protein 429	0.0555556	AC=1;AF=0.500;AN=2;BaseQRankSum=-14.264;DP=499;Dels=0.00;EFF=NON_SYNONYMOUS_CODING(MODERATE|MISSENSE|Cat/Aat|H475N|674|ZNF429||CODING|NM_001001415.2|4|1);FS=0.330;HaplotypeScore=9.5869;MLEAC=1;MLEAF=0.500;MQ=58.52;MQ0=4;MQRankSum=0.832;QD=11.24;ReadPosRankSum=-0.872	chr19.21688436-21721079 ; 19p12 ; gain
ZNF461	zinc finger protein 461	0.111111	AC=1;AF=0.500;AN=2;BaseQRankSum=-8.337;DP=500;Dels=0.00;EFF=NON_SYNONYMOUS_CODING(MODERATE|MISSENSE|gGt/gTt|G493V|563|ZNF461||CODING|NM_153257.2|6|1);FS=18.821;HaplotypeScore=4.8206;MLEAC=1;MLEAF=0.500;MQ=59.66;MQ0=3;MQRankSum=-0.452;QD=3.25;ReadPosRankSum=0.050	chr19.37128282-37157739 ; 19q13.12 ; gain
ZNF462	zinc finger protein 462	0.277778	AC=1;AF=0.500;AN=2;BaseQRankSum=7.827;DB;DP=500;Dels=0.00;EFF=INTRON(MODIFIER|||||MIR548Q||NON_CODING|NR_031752.1|2|1),NON_SYNONYMOUS_CODING(MODERATE|MISSENSE|Atg/Gtg|M404V|2506|ZNF462||CODING|NM_021224.4|3|1);FS=1.509;HaplotypeScore=5.2210;MLEAC=1;MLEAF=0.500;MQ=60.00;MQ0=0;MQRankSum=0.870;QD=14.07;ReadPosRankSum=-1.267	chr9.109625377-109773796 ; 9q31.2 ; loss
ZNF479	zinc finger protein 479; zinc finger protein 733	0.138889	AC=1;AF=0.500;AN=2;BaseQRankSum=-4.789;DP=500;Dels=0.00;EFF=NON_SYNONYMOUS_CODING(MODERATE|MISSENSE|Gaa/Caa|E24Q|524|ZNF479||CODING|NM_033273.1|3|1);FS=0.000;HaplotypeScore=5.4199;MLEAC=1;MLEAF=0.500;MQ=52.57;MQ0=18;MQRankSum=1.230;QD=12.75;ReadPosRankSum=0.833	chr7.57187325-57207571 ; 7p11.2 ; gain
ZNF511	zinc finger protein 511	0.0833333	AC=1;AF=0.500;AN=2;BaseQRankSum=4.023;DP=500;Dels=0.00;EFF=INTRON(MODIFIER|||||TUBGCP2||CODING|NR_046330.1|1|1),NON_SYNONYMOUS_CODING(MODERATE|MISSENSE|Gga/Aga|G119R|252|ZNF511||CODING|NM_145806.2|3|1),UPSTREAM(MODIFIER||||772|TUBGCP2||CODING|NM_001256618.1||1),UPSTREAM(MODIFIER||||902|TUBGCP2||CODING|NM_006659.3||1),UPSTREAM(MODIFIER||||930|TUBGCP2||CODING|NM_001256617.1||1);FS=10.956;HaplotypeS…	chr10.135122422-135126666 ; 10q26.3 ; gain
ZNF518A	zinc finger protein 518A	0.0555556	NA	chr10.97889471-97923517 ; 10q24.1 ; gain
ZNF536	zinc finger protein 536	0.166667	AC=1;AF=0.500;AN=2;BaseQRankSum=11.819;DB;DP=500;Dels=0.00;EFF=NON_SYNONYMOUS_CODING(MODERATE|MISSENSE|Ggt/Agt|G911S|1300|ZNF536||CODING|NM_014717.1|4|1);FS=2.123;HaplotypeScore=10.5737;MLEAC=1;MLEAF=0.500;MQ=60.00;MQ0=0;MQRankSum=-0.309;QD=14.94;ReadPosRankSum=-1.871	chr19.30863327-31048965 ; 19q12 ; gain
ZNF560	zinc finger protein 560	0.0833333	AC=2;AF=1.00;AN=2;BaseQRankSum=1.704;DP=500;Dels=0.00;EFF=NON_SYNONYMOUS_CODING(MODERATE|MISSENSE|Gaa/Caa|E327Q|790|ZNF560||CODING|NM_152476.2|10|1);FS=0.000;HaplotypeScore=11.3175;MLEAC=2;MLEAF=1.00;MQ=60.00;MQ0=0;MQRankSum=-0.084;QD=30.99;ReadPosRankSum=1.550	chr19.9577030-9609279 ; 19p13.2 ; loss
ZNF573	zinc finger protein 573	0.138889	AC=1;AF=0.500;AN=2;BaseQRankSum=-0.342;DP=500;Dels=0.00;EFF=NON_SYNONYMOUS_CODING(MODERATE|MISSENSE|cAa/cTa|Q315L|577|ZNF573||CODING|NM_001172689.1|6|1),NON_SYNONYMOUS_CODING(MODERATE|MISSENSE|cAa/cTa|Q315L|577|ZNF573||CODING|NM_001172692.1|4|1),NON_SYNONYMOUS_CODING(MODERATE|MISSENSE|cAa/cTa|Q345L|607|ZNF573||CODING|NM_152360.3|8|1),NON_SYNONYMOUS_CODING(MODERATE|MISSENSE|cAa/cTa|Q401L|663|ZNF57…	chr19.38229202-38270230 ; 19q13.12 ; gain
ZNF583	zinc finger protein 583	0.166667	NA	chr19.56915382-56936400 ; 19q13.43 ; gain
ZNF609	zinc finger protein 609	0.0555556	AC=1;AF=0.500;AN=2;BaseQRankSum=-0.775;DP=500;Dels=0.00;EFF=NON_SYNONYMOUS_CODING(MODERATE|MISSENSE|gAg/gGg|E251G|1411|ZNF609||CODING|NM_015042.1|2|1);FS=8.654;HaplotypeScore=5.7599;MLEAC=1;MLEAF=0.500;MQ=60.00;MQ0=0;MQRankSum=-0.175;QD=13.07;ReadPosRankSum=0.346	chr15.64791618-64978266 ; 15q22.31 ; gain
ZNF610	zinc finger protein 610	0.0555556	NA	chr19.52839497-52870376 ; 19q13.41 ; gain
ZNF615	zinc finger protein 615	0.388889	AC=1;AF=0.500;AN=2;BaseQRankSum=-2.149;DB;DP=500;Dels=0.00;EFF=NON_SYNONYMOUS_CODING(MODERATE|MISSENSE|aGg/aAg|R727K|731|ZNF615||CODING|NM_198480.3|6|1),NON_SYNONYMOUS_CODING(MODERATE|MISSENSE|aGg/aAg|R738K|742|ZNF615||CODING|NM_001199324.1|7|1);FS=0.824;HaplotypeScore=7.9207;MLEAC=1;MLEAF=0.500;MQ=59.89;MQ0=0;MQRankSum=-1.189;QD=2.76;ReadPosRankSum=-0.486 , AC=1;AF=0.500;AN=2;BaseQRankSum=-4.391…	chr19.52494586-52511483 ; 19q13.41 ; loss
ZNF644	zinc finger protein 644	0.166667	NA	chr1.91380856-91487812 ; 1p22.2 ; loss
ZNF679	zinc finger protein 679; zinc finger protein 735	0.0555556	AC=1;AF=0.500;AN=2;BaseQRankSum=-15.833;DP=500;Dels=0.00;EFF=NON_SYNONYMOUS_CODING(MODERATE|MISSENSE|Gac/Tac|D386Y|411|ZNF679||CODING|NM_153363.2|5|1);FS=2.936;HaplotypeScore=9.5039;MLEAC=1;MLEAF=0.500;MQ=59.90;MQ0=0;MQRankSum=-1.065;QD=13.02;ReadPosRankSum=-0.274	chr7.63688851-63727309 ; 7q11.21 ; gain
ZNF681	zinc finger protein 681	0.0555556	AC=1;AF=0.500;AN=2;BaseQRankSum=9.647;DP=499;Dels=0.00;EFF=NON_SYNONYMOUS_CODING(MODERATE|MISSENSE|aTt/aCt|I221T|645|ZNF681||CODING|NM_138286.2|4|1);FS=9.136;HaplotypeScore=4.9278;MLEAC=1;MLEAF=0.500;MQ=60.02;MQ0=0;MQRankSum=-0.097;QD=13.15;ReadPosRankSum=0.312	chr19.23921996-23941693 ; 19p12 ; gain
ZNF687	zinc finger protein 687	0.0555556	NA	chr1.151254790-151264381 ; 1q21.3 ; gain
ZNF7	zinc finger protein 7	0.0833333	NA	chr8.146052902-146068606 ; 8q24.3 ; gain
ZNF704	zinc finger protein 704	0.0833333	AC=1;AF=0.500;AN=2;BaseQRankSum=9.345;DP=500;Dels=0.00;EFF=NON_SYNONYMOUS_CODING(MODERATE|MISSENSE|cGg/cAg|R42Q|412|ZNF704||CODING|NM_001033723.2|2|1);FS=1.136;HaplotypeScore=6.6689;MLEAC=1;MLEAF=0.500;MQ=60.00;MQ0=0;MQRankSum=0.827;QD=9.52;ReadPosRankSum=-0.810	chr8.81540685-81787016 ; 8q21.13 ; gain
ZNF721	zinc finger protein 721	0.0555556	AC=2;AF=1.00;AN=2;BaseQRankSum=1.585;DP=496;Dels=0.00;EFF=INTRON(MODIFIER|||||ABCA11P||NON_CODING|NR_002451.2|2|1),NON_SYNONYMOUS_CODING(MODERATE|MISSENSE|gGa/gCa|G917A|923|ZNF721||CODING|NM_133474.2|3|1);FS=0.000;HaplotypeScore=2.6912;MLEAC=2;MLEAF=1.00;MQ=59.60;MQ0=0;MQRankSum=1.627;QD=33.84;ReadPosRankSum=-0.996	chr4.433772-492960 ; 4p16.3 ; gain
ZNF727	zinc finger protein 727	0.0555556	AC=1;AF=0.500;AN=2;BaseQRankSum=-4.407;DP=500;Dels=0.00;EFF=NON_SYNONYMOUS_CODING(MODERATE|MISSENSE|gAg/gTg|E84V|499|ZNF727||CODING|NM_001159522.1|4|1);FS=6.819;HaplotypeScore=7.2186;MLEAC=1;MLEAF=0.500;MQ=59.99;MQ0=0;MQRankSum=1.345;QD=12.45;ReadPosRankSum=-1.775	chr7.63505820-63538927 ; 7q11.21 ; gain
ZNF80	zinc finger protein 80	0.0833333	NA	chr3.113953479-113956425 ; 3q13.31 ; gain
ZNF805	zinc finger protein 805	0.138889	AC=1;AF=0.500;AN=2;BaseQRankSum=-1.607;DP=500;Dels=0.00;EFF=NON_SYNONYMOUS_CODING(MODERATE|MISSENSE|cCc/cTc|P181L|494|ZNF805||CODING|NM_001145078.1|3|1),NON_SYNONYMOUS_CODING(MODERATE|MISSENSE|cCc/cTc|P314L|627|ZNF805||CODING|NM_001023563.3|4|1);FS=1.882;HaplotypeScore=11.0413;MLEAC=1;MLEAF=0.500;MQ=50.16;MQ0=0;MQRankSum=2.633;QD=13.57;ReadPosRankSum=-0.595	chr19.57752052-57774106 ; 19q13.43 ; gain
ZNF836	zinc finger protein 836	0.0833333	AC=1;AF=0.500;AN=2;BaseQRankSum=0.316;DP=500;Dels=0.00;EFF=NON_SYNONYMOUS_CODING(MODERATE|MISSENSE|Cgg/Tgg|R489W|936|ZNF836||CODING|NM_001102657.1|5|1);FS=0.677;HaplotypeScore=0.9973;MLEAC=1;MLEAF=0.500;MQ=59.58;MQ0=0;MQRankSum=0.004;QD=14.33;ReadPosRankSum=0.704	chr19.52658124-52674896 ; 19q13.41 ; loss
ZNF98	zinc finger protein 98 (F7175); keratin associated protein 1-1; zinc finger protein 492; zinc finger protein 849 pseudogene	0.0555556	NA	chr19.22573898-22605148 ; 19p12 ; gain
ZNF99	zinc finger protein 99	0.25	AC=2;AF=1.00;AN=2;BaseQRankSum=2.167;DB;DP=500;Dels=0.00;EFF=NON_SYNONYMOUS_CODING(MODERATE|MISSENSE|Tgc/Agc|C374S|864|ZNF99||CODING|NM_001080409.2|4|1);FS=3.004;HaplotypeScore=5.8268;MLEAC=2;MLEAF=1.00;MQ=55.40;MQ0=2;MQRankSum=-1.578;QD=34.73;ReadPosRankSum=0.399	chr19.22934984-22966973 ; 19p12 ; gain
ZSCAN29	zinc finger and SCAN domain containing 29	0.111111	NA	chr15.43650369-43662258 ; 15q15.3 ; gain

## Sheet: Table S2
Table S2: Summarized clinic-pathological features of NSCLC cohorts			GSE42127	GSE68465				GSE50081
Study	GSE68929		Tang, H (2013)	Director's Challenge Consortium (2008)				Der, SD (2014)
First Author (Year)	Wang, D (2016)		A 12-gene set predicts survival benefits from adjuvant chemotherapy in non-small cell lung cancer patients	Gene expression-based survival prediction in lung adenocarcinoma: a multi-site, blinded validation study				Validation of a histology-independent prognostic gene signature for early stage, non-small cell lung cancer including stage IA patients
Title	Molecular heterogeneity of non-small cell lung carcinoma patient-derived xenografts closely relect their primary tumors		Illumina Human-WG6 V3 assay was used to profile snap frozen tumor sepcimens from the Director’s Challenge Consortium.	Affymetrix Human Genome U133A Array				Affymetrix Human Genome U133 Plus 2.0 Array
Expression array method	Illumina DASL HT-12 V4 assay was used to profile snap frozen PDX specimens			UM	HLM	CAN/DF	MSK
Cohort	high NAG	low NAG	176	177	79	82	104	181
Total patients	27	9
Sex			83 (47.2%)	78 (44%)	39 (49%)	36 (44%)	66 (64%)	83 (46%)
Female	10(37%)	4(44.4%)	93 (52.8%)	99 (56%)	40 (51%)	46 (56%)	37 (36%)	98 (54%)
Male	17(63%)	5(55.6%)
Stage			112 (63.6%)	117 (66%)	43 (54%)	56 (68%)	63 (61%)	127 (70%)
I	14(51.9%)	5(55.6%)	32 (18.2%)	28 (16%)	20 (26%)	26 (32%)	20 (19%)	54 (30%)
II	4(14.8%)	1(11.1%)	30 (17.0%)	32 (18%)	15 (19%)	-	21 (20%)
III	8(29.6%)	0(0%)	1 (0.6%)	-	-	-	-	-
IV	1(3.7%)	3(33.3%)	1 (0.6%)	-	-	-	-	-
unknown
Histology			133 (75.6%)	177 (100%)	79 (100%)	82 (100%)	104 (100%)	128 (71%)
adenocarinoma	11(40.7%)	4(44.4%)	43 (24.4%)	-	-	-	-	43 (24%0
squamous	15(55.6%)	3(33.3%)		-	-	-	-	10 (6%)
Others	1(3.7%)	2(22.2%)

## Sheet: Table S3
Table S3: List of 36 NSCLC cases in the discovery set characterized by NAG levels and assoicated clinic-pathological features
phlcid	NAG.level	sex	stage	hist
12	High	F	3	ADC
50	High	M	2B	SQC
55	High	M	4	SQC
57	High	M	2B	SQC
77	High	M	3A	SQC
81	High	F	1A	ADC
85	High	M	3A	SQC
86	High	M	2B	SQC
89	High	M	1B	LCNEC
106	High	F	1A	SQC
108	High	M	1A	ADC
110	High	F	1B	ADC
113	High	M	1B	SQC
119	High	F	3A	ADC
132	High	M	1B	SQC
137	High	F	3A	ADC
139	High	M	1B	SQC
140	High	M	1B	SQC
148	High	F	3A	ADC
149	High	M	1B	SQC
152	High	M	1A	SQC
154	High	M	2B	ADC
162	High	F	1B	SQC
169	High	M	3B	ADC
178	High	F	3B	ADC
193	High	M	1B	SQC
207	High	F	1B	ADC
62	Low	M	1B	SQC
82	Low	F	1B	ADC
83	Low	M	4	ADC
88	Low	M	1B	LCNEC
123	Low	M	1A	SQC
133	Low	F	1B	ADC
134	Low	M	4	Sarcomatoid
142	Low	F	2B	SQC
191	Low	F	4	ADC

## Sheet: Table S4
Table S4: Differentially expressed genes between high and low NAG patients in the discovery set
Gene	Description	Function	log2 fold change (high NAG / low NAG)	fold change p-value	Prognostic Signature Coefficient
ABCA4	ATP-binding cassette, sub-family A (ABC1), member 4	Stargardt Disease	1.36381	0.0312948	-7.14e-06
ADRB2	adrenergic, beta-2-, receptor, surface	regulation of apoptosis	1.23188	0.0349718	-0.00201834
AGR3	anterior gradient homolog 3 (Xenopus laevis)	NA	-1.48125	0.0309001	0
ALDH1A3	aldehyde dehydrogenase 1 family, member A3	retinoic acid metabolic process	1.1736	0.0485968	0
AMHR2	anti-Mullerian hormone receptor, type II	TGF-beta signalling pathway	-1.53683	0.0357933	0
ANKRD35	ankyrin repeat domain 35	NA	1.48127	0.0014416	0
ARSE	arylsulfatase E (chondrodysplasia punctata 1)	NA	-1.00496	0.0318355	0
ATOH8	atonal homolog 8 (Drosophila)	Regulation of Transcription	-1.49735	0.0114012	-0.0764374
ATP13A4	ATPase type 13A4	transcription target: hsa_V$CEBP_Q2_01	1.25748	0.000485241	-0.0361053
AUTS2	autism susceptibility candidate 2	transcription target: hsa_CAGGTG_V$E12_Q6	1.32982	0.0308267	0
BEX2	brain expressed X-linked 2	NA	1.13589	0.0389581	0
C1orf110	chromosome 1 open reading frame 110	NA	1.04285	0.0349832	0
C1orf61	chromosome 1 open reading frame 61	Nucleus	-1.07946	0.0398898	0.0143282
CA8	carbonic anhydrase VIII	NA	-1.75779	0.0276525	0
CHDH	choline dehydrogenase	NA	-1.11369	0.00737416	0
CLDN8	claudin 8	cell adhesion	1.09255	0.0054064	0
COL8A1	collagen, type VIII, alpha 1	Extracellular Matrix	-1.47435	0.0372111	0
COX7B2	cytochrome c oxidase subunit VIIb2	NA	1.06518	0.0108244	-0.00010785
CRABP1	cellular retinoic acid binding protein 1	NA	-1.86296	0.0037779	0
CYP2S1	cytochrome P450, family 2, subfamily S, polypeptide 1	aromatase	1.97293	0.0293178	-0.00442242
CYP4B1	cytochrome P450, family 4, subfamily B, polypeptide 1	aromatase	1.07838	0.0376185	-0.0554445
DENND2A	DENN/MADD domain containing 2A	NA	-1.13081	0.0280996	0
DHRS9	dehydrogenase/reductase (SDR family) member 9	retinoic acid metabolic process	1.42488	0.0017469	0
DNAJC12	DnaJ (Hsp40) homolog, subfamily C, member 12	NA	-1.4738	0.0397068	0
DOCK3	dedicator of cytokinesis 3	transcription target: hsa_CAGGTG_V$E12_Q6	1.03624	0.00387751	0
EFS	embryonal Fyn-associated substrate	cell adhesion	1.59327	0.0463605	0
ELFN2	extracellular leucine-rich repeat and fibronectin type III domain containing 2	NA	-1.14713	0.0209107	-0.0124456
ELOVL4	elongation of very long chain fatty acids (FEN1/Elo2, SUR4/Elo3, yeast)-like 4	Stargardt Disease	1.76978	0.0187782	0
F2R	coagulation factor II (thrombin) receptor	blood coagulation	1.32913	0.0192459	0
F2RL2	coagulation factor II (thrombin) receptor-like 2	blood coagulation	1.06403	0.00117071	0
FAM167A	family with sequence similarity 167, member A	NA	-1.2199	0.0380043	-0.0595736
FCGBP	Fc fragment of IgG binding protein; similar to IgGFc-binding protein precursor (FcgammaBP) (Fcgamma-binding protein antigen)	von Willebrand factor, type C	-1.22087	0.0261625	0
FLJ23834	hypothetical protein LOC222256	NA	-1.65279	0.043678	0
FMOD	fibromodulin	Extracellular Matrix	-1.48811	0.0222715	0
FNDC4	fibronectin type III domain containing 4	NA	1.07146	0.0217917	0
GABRB3	gamma-aminobutyric acid (GABA) A receptor, beta 3	NA	-1.89922	0.0217711	0
HCK	hemopoietic cell kinase	Focal Adhesion	1.18354	0.0016556	-0.0740522
HIST1H2BG	histone cluster 1, H2bi; histone cluster 1, H2bg; histone cluster 1, H2be; histone cluster 1, H2bf; histone cluster 1, H2bc	DNA Binding	-1.37234	0.00509022	0
HRASLS	HRAS-like suppressor	NA	1.35332	0.0334949	0
ID2	inhibitor of DNA binding 2, dominant negative helix-loop-helix protein	Regulation of Cell Proliferation	-1.05418	0.0454838	0
IGFBP5	insulin-like growth factor binding protein 5	Regulation of Cell Proliferation	-1.3142	0.0456483	-0.000142459
IL17RB	interleukin 17 receptor B	Cytokine-cytokine receptor interaction	-1.04401	0.000297099	0
ITGB8	integrin, beta 8	cell adhesion	1.44566	0.00165993	0
KCNF1	potassium voltage-gated channel, subfamily F, member 1	NA	-1.16273	0.025928	0
KCNJ6	potassium inwardly-rectifying channel, subfamily J, member 6	NA	-1.49418	0.00592914	0.122631
KHDRBS3	KH domain containing, RNA binding, signal transduction associated 3	Regulation of Transcription	-1.29289	0.00753043	0
LOC100216001	hypothetical LOC100216001	NA	1.08694	0.0297299	NA
LOC399959	hypothetical LOC399959	NA	-1.52372	0.00987171	NA
LRMP	lymphoid-restricted membrane protein	NA	1.09409	0.0177472	0
LY6D	lymphocyte antigen 6 complex, locus D	cell adhesion	1.73778	0.0124468	0.0351272
MCTP1	multiple C2 domains, transmembrane 1	NA	-1.61524	0.00397644	0
MFSD4	major facilitator superfamily domain containing 4	transcription target: hsa_CAGGTG_V$E12_Q6	1.07456	0.000266376	0
MGP	matrix Gla protein	Extracellular Matrix	-1.69359	0.0313676	0
MID2	midline 2	transcription target: hsa_CAGGTG_V$E12_Q6	1.01589	0.0177898	-0.0543432
MMP10	matrix metallopeptidase 10 (stromelysin 2)	NA	1.5204	0.0497783	0
MT1G	metallothionein 1G	NA	-1.62953	0.00722216	0.0443708
OSTalpha	organic solute transporter alpha	NA	1.05822	0.00431184	0.0165701
PADI3	peptidyl arginine deiminase, type III	NA	1.17429	0.0179744	0
PCDH19	protocadherin 19	cell adhesion	1.21191	0.0189837	0
PDE4B	phosphodiesterase 4B, cAMP-specific	Integrated Pancreatic Cancer Pathway	-1.29749	0.0107356	-0.0174593
PKIB	protein kinase (cAMP-dependent, catalytic) inhibitor beta	NA	-1.50815	0.0241165	3.73e-06
POPDC3	popeye domain containing 3	NA	-1.03979	0.0232434	0
PRRX1	paired related homeobox 1	Regulation of Cell Proliferation	-1.31196	0.038849	0
PTGS1	prostaglandin-endoperoxide synthase 1 (prostaglandin G/H synthase and cyclooxygenase)	Regulation of Cell Proliferation	-1.10562	0.0134247	0
RAMP1	receptor (G protein-coupled) activity modifying protein 1	NA	-1.03269	0.0119208	-0.0177616
RYR1	ryanodine receptor 1 (skeletal)	transcription target: hsa_CAGGTG_V$E12_Q6	1.42119	0.0461247	0
SCGB1A1	secretoglobin, family 1A, member 1 (uteroglobin)	regulation of transcription, DNA-dependent	1.62495	0.0204381	0
SLC44A5	solute carrier family 44, member 5	NA	1.24387	0.000880914	0.0181831
SPOCK2	sparc/osteonectin, cwcv and kazal-like domains proteoglycan (testican) 2	Extracellular Matrix	-1.02547	0.012996	-0.0458421
SULT1B1	sulfotransferase family, cytosolic, 1B, member 1	NA	-1.03416	0.0320826	0
SYTL4	synaptotagmin-like 4	NA	1.01983	0.0484379	0
THBS1	thrombospondin 1	Regulation of Cell Proliferation	-1.18866	0.00989401	0
TMEM22	transmembrane protein 22	NA	-1.21966	0.00179445	0.0213527
TMEM40	transmembrane protein 40	NA	1.27461	0.0215287	0
TTC9	tetratricopeptide repeat domain 9	NA	1.06536	0.00705636	NA
ZFP37	zinc finger protein 37 homolog (mouse)	ZnF_C2H2	1.12798	0.0345635	0
ZNF135	zinc finger protein 135	ZnF_C2H2	1.21654	0.0200806	0
ZNF334	zinc finger protein 334	ZnF_C2H2	1.14496	0.0427808	0
ZNF365	zinc finger protein 365	ZnF_C2H2	1.42219	0.00255343	0

## Sheet: Table S7
Table S7: Comparison of mutation burden measures and their association with survival in early stage NSCLC
PMID	Year	First Author	Title	NSCLC cases	omics platform	Tumor mutation burden (TMB) method	results	Comments
NA	2018	Wang D	Non-driver somatic alteration burden confers good prognosis in non-small cell lung cancer.	With DNA + RNA: 218 stage I NSCLC (TCGA). With RNA: 127 chemo-naive NSCLC (GSE42127), 181 Stage I NSCLC (GSE50081), 330 stage I lung adeno (GSE68465)	whole exome, SNP array, RNAseq and microarrays	1st quartile is 88 altered genes (CNV or somatic nonsynonymous SNV) out of 865 genes. Plus burden metric for RNA expression and neoantigens	High overall burden associated with better prognosis. RNA signature for burden also identifies patients with better prognosis. Presence of neoantigens (>0) identify group with even better prognosis.
30253973	2018	Yu H	Correlation of PD-L1 expression with tumor mutation burden and gene signatures for prognosis in early stage squamous cell lung carcinoma.	199 squamous, resected, stage I and II, SPECS program	1,537 targeted genome sequencing, DNA from formalin-fixed, paraffin-embedded (FFPE) samples with macrodissection, no matched normal, germline variants were derived from public databases	Median 31 somatic mutations/Mb (range 17-195), high TMB is the TMB value at or above the median level.	No association of tumor mutation burden (TMB) with clinicopathological features and prognosis.
30106638	2018	Devarakonda S	Tumor Mutation Burden as a Biomarker in Resected Non-Small-Cell Lung Cancer	414 squamous, 375 adenocarcinoma, resected, majority stage II, LACE-Bio study	1,538 targeted genome sequencing; DNA from FFPE samples with no matched normal, germline variants were derived from public databases	Nonsynomous mutations occurred in most genes, terile categories identified, low (<4 or equal to mutations/Mb), intermediate (>4 to < or equal 8/Mb), high (> 8/Mb).	High nonsynonymous TMB (> 8 mutations/Mb) was associated with favourable prognosis when histologies, squamous and adenocarcinoma, were combined or analyzed independently. Prognosis was not assoicated with mutations in DNA repair pathways, tumor-infiltrating lymphocytes, TP53 alteration subtype and intratumor heterogeneity.
29654927	2018	Owada-Ozaki Y	Prognostic Impact of Tumor Mutation Burden in Patients With Completely Resected Non-Small Cell Lung Cancer: Brief Report	27 squaoumous, 63 adenocarcinoma, resected, mostly IA IB, some relapse patients received chemotherapy or targeted therapy.	whole exome, DNA from fresh tissue tumor and paired normal	Median is 62 nonsynomous mutations (range 10-502), equal or higher is considered high TMB.	High TMB was associated with worse overall survival in multivariate analysis.
29127022	2017	Dong ZY	Genetic and Immune Profiles of Solid Predominant Lung Adenocarcinoma Reveal Potential Immunotherapeutic Strategies	Adenocarcinoma subtypes, mostly early stage with smoking, 194 from TCGA study and 146 from Broad Institute, with matched normal. Whole genome sequencing was performed on the validation Great Lakes Cancer Institute (GLCI) set with matched normal.	somatic mutation retrieved from whole exome from TCGA data portal and cbioportal for the 2 public cohorts.	Somatic TMB was calculated from mutated genes with 1 or greater nonsynonymous mutation in the coding region per tumor.	Solid subtype compared to nonsolid subtypes had a poorer prognosis and was characterized with higher TMB.
26940869	2016	McGranahan N	Clonal neoantigens elicit T cell immunoreactivity and sensitivity to immune checkpoint blockade	92 squamous and 106 adenocarcinoma, mostly early stage, TCGA study	whole exome	Median is 326 neoantigens TMB per tumor (range 80-741), the upper quartile is high TMB.	High TMB was associated with significantly longer overall survival in adenocarcinoma. However, with similar ranges in TMB, there was no association with survival for squamous. HLA down-regulation in squamous compared to matched normal may contribute to escape of immune surveillance.
26752676	2015	Karasaki T	Identification of Individual Cancer-Specific Somatic Mutations for Neoantigen-Based Immunotherapy of Lung Cancer	6 squamous and 9 adenocarcinoma, mostly early stage, smokers, no outcome data.	whole exome, DNA from fresh tissue tumor and paired normal	Approach 1 off-the shelf-pipeline used shared mutations in the Catalogue Of Somatic Mutations In Cancer (COSMIC) occurring in >1% patients: 18 shared missense mutations in squamous and 22 in adenocarcinoma cases. Resulted in 10 off-the shelf potential neoantigens for squamous (range 5-12) and adenocarcinoma (range 5-13). Approach 2 Personalized: missense mutations were selected from whole exome d…	No survival test. Identification of individual cancer specific somatic mutations for potential neoantigens. Missense mutations were not shared among patients in this cohort, thus a personalized approach to predict potential neoantigen load would be favoured compared to an off-the-shelf pipeline.
